# Supplementary material for: Spatiotemporal and Individual Patterns of Domestic Cat (<em>Felis catus</em>) Hunting Behaviour in France
Source: Preprints.org preprint supplement (doi:10.20944/preprints202307.0128.v1), 2023-07-04
Supplement: Supplementary file 1 [file supplementary]

## Sheet: Feuil1
intern_number	Observation	enr_bdd_cat	catID	city	year	month	sexe	age	SUPER_CLASS	CLASSE	ORDER	SUPER_FAMILY	FAMILY	GENUS	Species	preys_taxa	buffer_100mtemp	buffer_100mprecip	buffer_100mFPI
1	32413	32448	abby_christine_gosseaume	31370	2018	5	Femelle	7	Tetrapoda	Mammalia	Rodentia	Myomorpha	Muridae	apodemus	Apodemus_sp	muroids	12.3966	866	40
2	475	497	abou_carole_violon	16000	2015	7	Male	3	Tetrapoda	Mammalia	Rodentia	Myomorpha	Muridae	apodemus	Apodemus_sp	muroids	12.456	851	89
3	561	583	abou_carole_violon	16000	2015	8	Male	3	Tetrapoda	Squamata	Squamata	Lacertilia	Lacertidae	podarcis	Podarcis_muralis	lacertilia	12.456	851	89
4	7996	8023	abou_niess_elise_lieffroy	88460	2015	11	Male	10	Tetrapoda	Aves	Passeriformes	Passeri	Paridae	cyanistes	Cyanistes_caeruleus	passeriforms	8.53542	1015	40
5	38526	PILON_03_08_20_05_08_20	abricot_nathalie_pilon	37530	2020	8	Male	9	Tetrapoda	Aves	Passeriformes	Passeri	Phylloscopidae	phylloscopus	Phylloscopus_collybita	passeriforms	11.3069	675	40
6	4785	4807	abricot_pascal_reboud	26400	2015	9	Male	6	Tetrapoda	Mammalia	Rodentia	Sciuromorpha	Sciuridae	sciurus	Sciurus_vulgaris	other_mammals	12.025	930	76
7	21827	21862	abricot_pascal_reboud	26400	2016	8	Male	7	Tetrapoda	Mammalia	Rodentia	Sciuromorpha	Gliridae	glis	Glis_glis	other_mammals	12.025	930	76
8	21828	21863	abricot_pascal_reboud	26400	2016	8	Male	7	Tetrapoda	Mammalia	Rodentia	Sciuromorpha	Gliridae	glis	Glis_glis	other_mammals	12.025	930	76
9	5582	5604	abricot_pascal_reboud	26400	2015	10	Male	6	Tetrapoda	Mammalia	Rodentia	Myomorpha	Muroidea_fam_gen_sp	Muroidea_fam_gen_sp	Muroidea_fam_gen_sp	muroids	12.025	930	76
10	6901	6928	abricot_pascal_reboud	26400	2015	10	Male	6	Tetrapoda	Mammalia	Rodentia	Myomorpha	Muridae	rattus	Rattus_norvegicus	muroids	12.025	930	76
11	17632	17667	abricot_pascal_reboud	26400	2016	6	Male	7	Tetrapoda	Mammalia	Rodentia	Myomorpha	Muridae	rattus	Rattus_norvegicus	muroids	12.025	930	76
12	8938	8965	abricot_pascal_reboud	26400	2015	12	Male	6	Tetrapoda	Mammalia	Rodentia	Myomorpha	Muridae	mus	Mus_musculus	muroids	12.025	930	76
13	17633	17668	abricot_pascal_reboud	26400	2016	6	Male	7	Tetrapoda	Squamata	Squamata	Lacertilia	Lacertidae	lacerta	Lacerta_bilineata	lacertilia	12.025	930	76
14	21826	21861	abricot_pascal_reboud	26400	2016	7	Male	7	Tetrapoda	Squamata	Squamata	Lacertilia	Lacertidae	lacerta	Lacerta_bilineata	lacertilia	12.025	930	76
15	36514	36550	abricot_petitcollin_julie	89310	2019	6	Male	5	Tetrapoda	Aves	Passeriformes	Passeri	Muscicapidae	phoenicurus	Phoenicurus_ochruros	passeriforms	10.2326	786	40
16	1474	1496	absolem_julie_roux	67340	2015	8	Male	1	Tetrapoda	Aves	Passeriformes	Passeri	Sylviidae	sylvia	Sylvia_atricapilla	passeriforms	9.21529	812	21
17	6094	6116	absolem_julie_roux	67340	2015	10	Male	1	Tetrapoda	Mammalia	Rodentia	Myomorpha	Cricetidae	microtus	Microtus_arvalis	cricetids	9.21529	812	21
18	7220	7247	absolem_julie_roux	67340	2015	10	Male	1	Tetrapoda	Mammalia	Rodentia	Myomorpha	Muridae	mus	Mus_musculus	muroids	9.21529	812	21
19	38285	VEZON_01_01_20_28_04_20	absolem_nathalie_vezon	63490	2020	1	Male	4	Tetrapoda	Mammalia	Rodentia	Myomorpha	Cricetidae	microtus	Microtus_arvalis	cricetids	10.0559	637	28
20	38286	VEZON_04_01_20_28_04_20	absolem_nathalie_vezon	63490	2020	1	Male	4	Tetrapoda	Mammalia	Rodentia	Myomorpha	Muridae	apodemus	Apodemus_sp	muroids	10.0559	637	28
21	38287	VEZON_27_12_19_28_04_20	absolem_nathalie_vezon	63490	2019	12	Male	3	Tetrapoda	Mammalia	Eulipotyphla	Soricidae	Soricidae	Soricidae_gen_sp	Soricidae_gen_sp	soricids	10.0559	637	28
22	9785	9812	acajou_sophie_noally	42130	2016	1	Male	12	Tetrapoda	Mammalia	Rodentia	Myomorpha	Muridae	mus	Mus_musculus	muroids	10.7802	717	46
23	22491	22526	achille_dorinne_henrard	66000	2016	9	Male	9	Arthropoda	Hexapoda	Lepidoptera	Lepidoptera_fam_gen_sp	Lepidoptera_fam_gen_sp	Lepidoptera_fam_gen_sp	Lepidoptera_fam_gen_sp	hexapods	15.2572	545	90
24	22654	22689	achille_dorinne_henrard	66000	2016	9	Male	9	Tetrapoda	Mammalia	Rodentia	Myomorpha	Muridae	mus	Mus_musculus	muroids	15.2572	545	90
25	18069	18104	achille_dorinne_henrard	66000	2016	6	Male	9	Tetrapoda	Squamata	Squamata	Lacertilia	Lacertilia_fam_gen_sp	Lacertilia_fam_gen_sp	Lacertilia_fam_gen_sp	lacertilia	15.2572	545	90
26	18070	18105	achille_dorinne_henrard	66000	2016	6	Male	9	Tetrapoda	Squamata	Squamata	Lacertilia	Lacertilia_fam_gen_sp	Lacertilia_fam_gen_sp	Lacertilia_fam_gen_sp	lacertilia	15.2572	545	90
27	18072	18107	achille_dorinne_henrard	66000	2016	6	Male	9	Tetrapoda	Squamata	Squamata	Lacertilia	Lacertilia_fam_gen_sp	Lacertilia_fam_gen_sp	Lacertilia_fam_gen_sp	lacertilia	15.2572	545	90
28	18074	18109	achille_dorinne_henrard	66000	2016	6	Male	9	Tetrapoda	Squamata	Squamata	Lacertilia	Lacertilia_fam_gen_sp	Lacertilia_fam_gen_sp	Lacertilia_fam_gen_sp	lacertilia	15.2572	545	90
29	18131	18166	achille_dorinne_henrard	66000	2016	6	Male	9	Tetrapoda	Squamata	Squamata	Lacertilia	Lacertilia_fam_gen_sp	Lacertilia_fam_gen_sp	Lacertilia_fam_gen_sp	lacertilia	15.2572	545	90
30	18854	18889	achille_dorinne_henrard	66000	2016	6	Male	9	Tetrapoda	Squamata	Squamata	Lacertilia	Lacertilia_fam_gen_sp	Lacertilia_fam_gen_sp	Lacertilia_fam_gen_sp	lacertilia	15.2572	545	90
31	18855	18890	achille_dorinne_henrard	66000	2016	6	Male	9	Tetrapoda	Squamata	Squamata	Lacertilia	Lacertilia_fam_gen_sp	Lacertilia_fam_gen_sp	Lacertilia_fam_gen_sp	lacertilia	15.2572	545	90
32	19488	19523	achille_dorinne_henrard	66000	2016	7	Male	9	Tetrapoda	Squamata	Squamata	Lacertilia	Lacertilia_fam_gen_sp	Lacertilia_fam_gen_sp	Lacertilia_fam_gen_sp	lacertilia	15.2572	545	90
33	20192	20227	achille_dorinne_henrard	66000	2016	7	Male	9	Tetrapoda	Squamata	Squamata	Lacertilia	Lacertilia_fam_gen_sp	Lacertilia_fam_gen_sp	Lacertilia_fam_gen_sp	lacertilia	15.2572	545	90
34	10714	10749	achille_nadia_turminel	37460	2016	1	Male	1	Tetrapoda	Aves	Aves_ord_fam_gen_sp	Aves_ord_fam_gen_sp	Aves_ord_fam_gen_sp	Aves_ord_fam_gen_sp	Aves_ord_fam_gen_sp	other_birds	11.2013	703	25
35	9384	9411	achille_nadia_turminel	37460	2015	12	Male	0	Tetrapoda	Mammalia	Eulipotyphla	Soricidae	Soricidae	Soricidae_gen_sp	Soricidae_gen_sp	soricids	11.2013	703	25
36	10712	10747	achille_nadia_turminel	37460	2015	12	Male	0	Tetrapoda	Mammalia	Eulipotyphla	Soricidae	Soricidae	Soricidae_gen_sp	Soricidae_gen_sp	soricids	11.2013	703	25
37	10713	10748	achille_nadia_turminel	37460	2016	1	Male	1	Tetrapoda	Mammalia	Eulipotyphla	Soricidae	Soricidae	Soricidae_gen_sp	Soricidae_gen_sp	soricids	11.2013	703	25
38	11956	11991	achille_nadia_turminel	37460	2016	3	Male	1	Tetrapoda	Squamata	Squamata	Lacertilia	Lacertidae	lacerta	Lacerta_sp	lacertilia	11.2013	703	25
39	NA	NA	adonis_francoise_viala	31190	2020	11	Male	0	Tetrapoda	Mammalia	Rodentia	Myomorpha	Muroidea_fam_gen_sp	Muroidea_fam_gen_sp	Muroidea_fam_gen_sp	muroids	12.6816	729	84
40	3065	3087	adonis_francoise_viala	31190	2015	9	Male	3	Tetrapoda	Aves	Passeriformes	Passeri	Passeridae	passer	Passer_domesticus	passeriforms	12.7658	744	40
41	25279	25314	adonis_francoise_viala	31190	2017	1	Male	5	Tetrapoda	Mammalia	Rodentia	Myomorpha	Cricetidae	microtus	Microtus_arvalis	cricetids	12.7658	744	40
42	577	599	adonis_francoise_viala	31190	2015	7	Male	3	Tetrapoda	Mammalia	Rodentia	Myomorpha	Muroidea_fam_gen_sp	Muroidea_fam_gen_sp	Muroidea_fam_gen_sp	muroids	12.7658	744	40
43	3063	3085	adonis_francoise_viala	31190	2015	9	Male	3	Tetrapoda	Mammalia	Rodentia	Myomorpha	Muridae	apodemus	Apodemus_sp	muroids	12.7658	744	40
44	3064	3086	adonis_francoise_viala	31190	2015	9	Male	3	Tetrapoda	Mammalia	Rodentia	Myomorpha	Muridae	apodemus	Apodemus_sp	muroids	12.7658	744	40
45	3066	3088	adonis_francoise_viala	31190	2015	9	Male	3	Tetrapoda	Mammalia	Rodentia	Myomorpha	Muridae	apodemus	Apodemus_sp	muroids	12.7658	744	40
46	3067	3089	adonis_francoise_viala	31190	2015	9	Male	3	Tetrapoda	Mammalia	Rodentia	Myomorpha	Muridae	apodemus	Apodemus_sp	muroids	12.7658	744	40
47	35982	36017	adonis_francoise_viala	31190	2019	7	Male	7	Tetrapoda	Mammalia	Rodentia	Myomorpha	Muridae	apodemus	Apodemus_sp	muroids	12.7658	744	40
48	20358	20393	adonis_francoise_viala	31190	2016	7	Male	4	Tetrapoda	Mammalia	Eulipotyphla	Soricidae	Soricidae	sorex	Sorex_coronatus	soricids	12.7658	744	40
49	25280	25315	adonis_francoise_viala	31190	2017	1	Male	5	Tetrapoda	Mammalia	Eulipotyphla	Soricidae	Soricidae	Soricidae_gen_sp	Soricidae_gen_sp	soricids	12.7658	744	40
50	576	598	adonis_francoise_viala	31190	2015	8	Male	3	Tetrapoda	Mammalia	Rodentia	Myomorpha	Cricetidae	Cricetidae_gen_sp	Cricetidae_gen_sp	cricetids	12.7658	744	40
51	685	707	adonis_francoise_viala	31190	2015	8	Male	3	Tetrapoda	Mammalia	Rodentia	Myomorpha	Cricetidae	Cricetidae_gen_sp	Cricetidae_gen_sp	cricetids	12.7658	744	40
52	20161	20196	adonis_francoise_viala	31190	2016	7	Male	4	Tetrapoda	Mammalia	Rodentia	Myomorpha	Cricetidae	Cricetidae_gen_sp	Cricetidae_gen_sp	cricetids	12.7658	744	40
53	20160	20195	adonis_francoise_viala	31190	2016	7	Male	4	Tetrapoda	Mammalia	Rodentia	Myomorpha	Muroidea_fam_gen_sp	Muroidea_fam_gen_sp	Muroidea_fam_gen_sp	muroids	12.7658	744	40
54	20162	20197	adonis_francoise_viala	31190	2016	7	Male	4	Tetrapoda	Mammalia	Rodentia	Myomorpha	Muroidea_fam_gen_sp	Muroidea_fam_gen_sp	Muroidea_fam_gen_sp	muroids	12.7658	744	40
55	20357	20392	adonis_francoise_viala	31190	2016	7	Male	4	Tetrapoda	Mammalia	Rodentia	Myomorpha	Muroidea_fam_gen_sp	Muroidea_fam_gen_sp	Muroidea_fam_gen_sp	muroids	12.7658	744	40
56	22603	22638	aglae_agnes_cadier	22190	2016	9	Femelle	13	Arthropoda	Hexapoda	Lepidoptera	Lepidoptera_fam_gen_sp	Lepidoptera_fam_gen_sp	Lepidoptera_fam_gen_sp	Lepidoptera_fam_gen_sp	hexapods	11.3639	908	NA
57	6778	6805	aglae_agnes_cadier	22190	2015	10	Femelle	12	Arthropoda	Hexapoda	Orthoptera	Orthoptera_fam_gen_sp	Orthoptera_fam_gen_sp	Orthoptera_fam_gen_sp	Orthoptera_fam_gen_sp	hexapods	11.3639	908	NA
58	16785	16820	aglae_agnes_cadier	22190	2016	6	Femelle	13	Tetrapoda	Mammalia	Eulipotyphla	Soricidae	Soricidae	Soricidae_gen_sp	Soricidae_gen_sp	soricids	11.3639	908	NA
59	4184	4206	aglae_agnes_cadier	22190	2015	9	Femelle	12	Tetrapoda	Mammalia	Rodentia	Myomorpha	Muroidea_fam_gen_sp	Muroidea_fam_gen_sp	Muroidea_fam_gen_sp	muroids	11.3639	908	NA
60	8663	8690	aglae_agnes_cadier	22190	2015	12	Femelle	12	Tetrapoda	Mammalia	Rodentia	Myomorpha	Muroidea_fam_gen_sp	Muroidea_fam_gen_sp	Muroidea_fam_gen_sp	muroids	11.3639	908	NA
61	16057	16092	aglae_agnes_cadier	22190	2016	5	Femelle	13	Tetrapoda	Mammalia	Rodentia	Myomorpha	Muroidea_fam_gen_sp	Muroidea_fam_gen_sp	Muroidea_fam_gen_sp	muroids	11.3639	908	NA
62	17124	17159	aglae_agnes_cadier	22190	2016	6	Femelle	13	Tetrapoda	Mammalia	Rodentia	Myomorpha	Muroidea_fam_gen_sp	Muroidea_fam_gen_sp	Muroidea_fam_gen_sp	muroids	11.3639	908	NA
63	18435	18470	aglae_agnes_cadier	22190	2016	6	Femelle	13	Tetrapoda	Mammalia	Rodentia	Myomorpha	Muroidea_fam_gen_sp	Muroidea_fam_gen_sp	Muroidea_fam_gen_sp	muroids	11.3639	908	NA
64	18744	18779	aglae_agnes_cadier	22190	2016	7	Femelle	13	Tetrapoda	Mammalia	Rodentia	Myomorpha	Muroidea_fam_gen_sp	Muroidea_fam_gen_sp	Muroidea_fam_gen_sp	muroids	11.3639	908	NA
65	19279	19314	aglae_agnes_cadier	22190	2016	7	Femelle	13	Tetrapoda	Mammalia	Rodentia	Myomorpha	Muroidea_fam_gen_sp	Muroidea_fam_gen_sp	Muroidea_fam_gen_sp	muroids	11.3639	908	NA
66	19424	19459	aglae_agnes_cadier	22190	2016	7	Femelle	13	Tetrapoda	Mammalia	Rodentia	Myomorpha	Muroidea_fam_gen_sp	Muroidea_fam_gen_sp	Muroidea_fam_gen_sp	muroids	11.3639	908	NA
67	19936	19971	aglae_agnes_cadier	22190	2016	7	Femelle	13	Tetrapoda	Mammalia	Rodentia	Myomorpha	Muroidea_fam_gen_sp	Muroidea_fam_gen_sp	Muroidea_fam_gen_sp	muroids	11.3639	908	NA
68	21272	21307	aglae_agnes_cadier	22190	2016	8	Femelle	13	Tetrapoda	Mammalia	Rodentia	Myomorpha	Muroidea_fam_gen_sp	Muroidea_fam_gen_sp	Muroidea_fam_gen_sp	muroids	11.3639	908	NA
69	21386	21421	aglae_agnes_cadier	22190	2016	8	Femelle	13	Tetrapoda	Mammalia	Rodentia	Myomorpha	Muroidea_fam_gen_sp	Muroidea_fam_gen_sp	Muroidea_fam_gen_sp	muroids	11.3639	908	NA
70	16315	16350	aglae_agnes_cadier	22190	2016	5	Femelle	13	Tetrapoda	Mammalia	Rodentia	Myomorpha	Muroidea_fam_gen_sp	Muroidea_fam_gen_sp	Muroidea_fam_gen_sp	muroids	11.3639	908	NA
71	20820	20855	aglae_agnes_cadier	22190	2016	8	Femelle	13	Tetrapoda	Mammalia	Rodentia	Myomorpha	Muroidea_fam_gen_sp	Muroidea_fam_gen_sp	Muroidea_fam_gen_sp	muroids	11.3639	908	NA
72	20821	20856	aglae_agnes_cadier	22190	2016	8	Femelle	13	Tetrapoda	Mammalia	Rodentia	Myomorpha	Muroidea_fam_gen_sp	Muroidea_fam_gen_sp	Muroidea_fam_gen_sp	muroids	11.3639	908	NA
73	17121	17156	aglae_agnes_cadier	22190	2016	6	Femelle	13	Tetrapoda	Mammalia	Rodentia	Myomorpha	Muroidea_fam_gen_sp	Muroidea_fam_gen_sp	Muroidea_fam_gen_sp	muroids	11.3639	908	NA
74	4185	4207	aglae_agnes_cadier	22190	2015	9	Femelle	12	Tetrapoda	Mammalia	Rodentia	Myomorpha	Muroidea_fam_gen_sp	Muroidea_fam_gen_sp	Muroidea_fam_gen_sp	muroids	11.3639	908	NA
75	2090	2112	ahmes_benedicte_charbonnier	28500	2015	8	Femelle	3	Arthropoda	Hexapoda	Diptera	Diptera_fam_gen_sp	Diptera_fam_gen_sp	Diptera_fam_gen_sp	Diptera_fam_gen_sp	hexapods	10.3007	613	78
76	1217	1239	ahmes_benedicte_charbonnier	28500	2015	8	Femelle	3	Arthropoda	Hexapoda	Lepidoptera	Lepidoptera_fam_gen_sp	Lepidoptera_fam_gen_sp	Lepidoptera_fam_gen_sp	Lepidoptera_fam_gen_sp	hexapods	10.3007	613	78
77	2499	2521	airo_damien_reinhard	22800	2015	8	Male	4	Osteichtyes	Actinopterygii	Siluriformes	Ictaluridae	Ictaluridae	ameiurus	Ameiurus_melas	fishes	10.8588	971	21
78	2496	2518	airo_damien_reinhard	22800	2015	8	Male	4	Tetrapoda	Mammalia	Lagomorpha	Leporidae	Leporidae	oryctolagus	Oryctolagus_cuniculus	other_mammals	10.8588	971	21
79	2497	2519	airo_damien_reinhard	22800	2015	8	Male	4	Tetrapoda	Mammalia	Lagomorpha	Leporidae	Leporidae	oryctolagus	Oryctolagus_cuniculus	other_mammals	10.8588	971	21
80	28522	28557	airo_damien_reinhard	22800	2017	6	Male	6	Tetrapoda	Mammalia	Lagomorpha	Leporidae	Leporidae	oryctolagus	Oryctolagus_cuniculus	other_mammals	10.8588	971	21
81	2495	2517	airo_damien_reinhard	22800	2015	8	Male	4	Tetrapoda	Mammalia	Eulipotyphla	Soricidae	Soricidae	Soricidae_gen_sp	Soricidae_gen_sp	soricids	10.8588	971	21
82	21625	21660	airo_damien_reinhard	22800	2016	8	Male	5	Tetrapoda	Mammalia	Eulipotyphla	Soricidae	Soricidae	Soricidae_gen_sp	Soricidae_gen_sp	soricids	10.8588	971	21
83	3181	3203	airo_damien_reinhard	22800	2015	9	Male	4	Tetrapoda	Mammalia	Rodentia	Myomorpha	Muroidea_fam_gen_sp	Muroidea_fam_gen_sp	Muroidea_fam_gen_sp	muroids	10.8588	971	21
84	20283	20318	airo_damien_reinhard	22800	2016	7	Male	5	Tetrapoda	Mammalia	Rodentia	Myomorpha	Muroidea_fam_gen_sp	Muroidea_fam_gen_sp	Muroidea_fam_gen_sp	muroids	10.8588	971	21
85	20284	20319	airo_damien_reinhard	22800	2016	7	Male	5	Tetrapoda	Mammalia	Rodentia	Myomorpha	Muroidea_fam_gen_sp	Muroidea_fam_gen_sp	Muroidea_fam_gen_sp	muroids	10.8588	971	21
86	22486	22521	airo_damien_reinhard	22800	2016	9	Male	5	Tetrapoda	Mammalia	Rodentia	Myomorpha	Muroidea_fam_gen_sp	Muroidea_fam_gen_sp	Muroidea_fam_gen_sp	muroids	10.8588	971	21
87	11788	11823	airo_damien_reinhard	22800	2016	3	Male	5	Tetrapoda	Mammalia	Rodentia	Myomorpha	Muridae	mus	Mus_musculus	muroids	10.8588	971	21
88	11821	11856	airo_damien_reinhard	22800	2016	3	Male	5	Tetrapoda	Mammalia	Rodentia	Myomorpha	Muridae	mus	Mus_musculus	muroids	10.8588	971	21
89	11822	11857	airo_damien_reinhard	22800	2016	3	Male	5	Tetrapoda	Mammalia	Rodentia	Myomorpha	Muridae	mus	Mus_musculus	muroids	10.8588	971	21
90	12239	12274	airo_damien_reinhard	22800	2016	4	Male	5	Tetrapoda	Mammalia	Rodentia	Myomorpha	Muridae	mus	Mus_musculus	muroids	10.8588	971	21
91	22485	22520	airo_damien_reinhard	22800	2016	9	Male	5	Tetrapoda	Mammalia	Rodentia	Myomorpha	Muridae	mus	Mus_musculus	muroids	10.8588	971	21
92	28523	28558	airo_damien_reinhard	22800	2017	6	Male	6	Tetrapoda	Mammalia	Rodentia	Myomorpha	Muridae	mus	Mus_musculus	muroids	10.8588	971	21
93	28816	28851	airo_damien_reinhard	22800	2017	7	Male	6	Tetrapoda	Mammalia	Rodentia	Myomorpha	Muridae	mus	Mus_musculus	muroids	10.8588	971	21
94	29273	29308	airo_damien_reinhard	22800	2017	7	Male	6	Tetrapoda	Mammalia	Rodentia	Myomorpha	Muridae	mus	Mus_musculus	muroids	10.8588	971	21
95	19745	19780	akalitus_alexandra_bul	13770	2016	7	Femelle	4	Tetrapoda	Aves	Passeriformes	Passeri	Prunellidae	prunella	Prunella_modularis	passeriforms	13.5317	698	34
96	23081	23116	akalitus_alexandra_bul	13770	2016	9	Femelle	4	Arthropoda	Hexapoda	Lepidoptera	Lepidoptera_fam_gen_sp	Lepidoptera_fam_gen_sp	Lepidoptera_fam_gen_sp	Lepidoptera_fam_gen_sp	hexapods	13.5317	698	34
97	11610	11645	akalitus_alexandra_bul	13770	2016	3	Femelle	4	Tetrapoda	Mammalia	Rodentia	Myomorpha	Muridae	apodemus	Apodemus_sp	muroids	13.5317	698	34
98	14516	14551	akalitus_alexandra_bul	13770	2016	5	Femelle	4	Tetrapoda	Mammalia	Rodentia	Myomorpha	Muridae	apodemus	Apodemus_sp	muroids	13.5317	698	34
99	9719	9746	akalitus_alexandra_bul	13770	2016	1	Femelle	4	Tetrapoda	Mammalia	Eulipotyphla	Soricidae	Soricidae	Soricidae_gen_sp	Soricidae_gen_sp	soricids	13.5317	698	34
100	10909	10944	akalitus_alexandra_bul	13770	2016	2	Femelle	4	Tetrapoda	Mammalia	Eulipotyphla	Soricidae	Soricidae	Soricidae_gen_sp	Soricidae_gen_sp	soricids	13.5317	698	34
101	11862	11897	akalitus_alexandra_bul	13770	2016	3	Femelle	4	Tetrapoda	Mammalia	Eulipotyphla	Soricidae	Soricidae	Soricidae_gen_sp	Soricidae_gen_sp	soricids	13.5317	698	34
102	11863	11898	akalitus_alexandra_bul	13770	2016	3	Femelle	4	Tetrapoda	Mammalia	Eulipotyphla	Soricidae	Soricidae	Soricidae_gen_sp	Soricidae_gen_sp	soricids	13.5317	698	34
103	14517	14552	akalitus_alexandra_bul	13770	2016	5	Femelle	4	Tetrapoda	Mammalia	Eulipotyphla	Soricidae	Soricidae	Soricidae_gen_sp	Soricidae_gen_sp	soricids	13.5317	698	34
104	14518	14553	akalitus_alexandra_bul	13770	2016	5	Femelle	4	Tetrapoda	Mammalia	Eulipotyphla	Soricidae	Soricidae	Soricidae_gen_sp	Soricidae_gen_sp	soricids	13.5317	698	34
105	14521	14556	akalitus_alexandra_bul	13770	2016	5	Femelle	4	Tetrapoda	Mammalia	Eulipotyphla	Soricidae	Soricidae	Soricidae_gen_sp	Soricidae_gen_sp	soricids	13.5317	698	34
106	17140	17175	akalitus_alexandra_bul	13770	2016	6	Femelle	4	Tetrapoda	Mammalia	Eulipotyphla	Soricidae	Soricidae	Soricidae_gen_sp	Soricidae_gen_sp	soricids	13.5317	698	34
107	19743	19778	akalitus_alexandra_bul	13770	2016	6	Femelle	4	Tetrapoda	Mammalia	Eulipotyphla	Soricidae	Soricidae	Soricidae_gen_sp	Soricidae_gen_sp	soricids	13.5317	698	34
108	19744	19779	akalitus_alexandra_bul	13770	2016	7	Femelle	4	Tetrapoda	Mammalia	Eulipotyphla	Soricidae	Soricidae	Soricidae_gen_sp	Soricidae_gen_sp	soricids	13.5317	698	34
109	11642	11677	akalitus_alexandra_bul	13770	2016	3	Femelle	4	Tetrapoda	Squamata	Squamata	Lacertilia	Lacertidae	podarcis	Podarcis_muralis	lacertilia	13.5317	698	34
110	11666	11701	akalitus_alexandra_bul	13770	2016	3	Femelle	4	Tetrapoda	Squamata	Squamata	Lacertilia	Lacertidae	podarcis	Podarcis_muralis	lacertilia	13.5317	698	34
111	14520	14555	akalitus_alexandra_bul	13770	2016	5	Femelle	4	Tetrapoda	Squamata	Squamata	Lacertilia	Lacertidae	podarcis	Podarcis_muralis	lacertilia	13.5317	698	34
112	19742	19777	akalitus_alexandra_bul	13770	2016	6	Femelle	4	Tetrapoda	Squamata	Squamata	Lacertilia	Lacertidae	podarcis	Podarcis_muralis	lacertilia	13.5317	698	34
113	14519	14554	akalitus_alexandra_bul	13770	2016	5	Femelle	4	Tetrapoda	Squamata	Squamata	Lacertilia	Lacertilia_fam_gen_sp	Lacertilia_fam_gen_sp	Lacertilia_fam_gen_sp	lacertilia	13.5317	698	34
114	12617	12652	akalitus_alexandra_bul	13770	2016	4	Femelle	4	Tetrapoda	Squamata	Squamata	Lacertilia	Anguidae	anguis	Anguis_fragilis	lacertilia	13.5317	698	34
115	20040	20075	akasha_gabrielle_cogne	94400	2016	7	Femelle	2	Tetrapoda	Aves	Passeriformes	Passeri	Sylviidae	sylvia	Sylvia_atricapilla	passeriforms	11.669	642	75
116	4450	4472	akasha_gabrielle_cogne	94400	2015	6	Femelle	1	Tetrapoda	Aves	Aves_ord_fam_gen_sp	Aves_ord_fam_gen_sp	Aves_ord_fam_gen_sp	Aves_ord_fam_gen_sp	Aves_ord_fam_gen_sp	other_birds	11.669	642	75
117	12255	12290	akasha_gabrielle_cogne	94400	2016	4	Femelle	2	Tetrapoda	Aves	Aves_ord_fam_gen_sp	Aves_ord_fam_gen_sp	Aves_ord_fam_gen_sp	Aves_ord_fam_gen_sp	Aves_ord_fam_gen_sp	other_birds	11.669	642	75
118	7524	7551	akasha_gabrielle_cogne	94400	2015	11	Femelle	1	Tetrapoda	Aves	Passeriformes	Passeri	Muscicapidae	erithacus	Erithacus_rubecula	passeriforms	11.669	642	75
119	15139	15174	akasha_gabrielle_cogne	94400	2016	4	Femelle	2	Tetrapoda	Aves	Passeriformes	Passeri	Muscicapidae	erithacus	Erithacus_rubecula	passeriforms	11.669	642	75
120	20158	20193	akasha_gabrielle_cogne	94400	2016	7	Femelle	2	Tetrapoda	Mammalia	Mammalia_ord_fam_gen_sp	Mammalia_ord_fam_gen_sp	Mammalia_ord_fam_gen_sp	Mammalia_ord_fam_gen_sp	Mammalia_ord_fam_gen_sp	other_mammals	11.669	642	75
121	23077	23112	akasha_gabrielle_cogne	94400	2016	9	Femelle	2	Tetrapoda	Mammalia	Mammalia_ord_fam_gen_sp	Mammalia_ord_fam_gen_sp	Mammalia_ord_fam_gen_sp	Mammalia_ord_fam_gen_sp	Mammalia_ord_fam_gen_sp	other_mammals	11.669	642	75
122	8343	8370	akasha_gabrielle_cogne	94400	2015	11	Femelle	1	Tetrapoda	Mammalia	Rodentia	Myomorpha	Muridae	apodemus	Apodemus_sp	muroids	11.669	642	75
123	9922	9949	akasha_gabrielle_cogne	94400	2016	1	Femelle	2	Tetrapoda	Mammalia	Rodentia	Myomorpha	Muridae	apodemus	Apodemus_sp	muroids	11.669	642	75
124	9923	9950	akasha_gabrielle_cogne	94400	2016	1	Femelle	2	Tetrapoda	Mammalia	Rodentia	Myomorpha	Muridae	apodemus	Apodemus_sp	muroids	11.669	642	75
125	9924	9951	akasha_gabrielle_cogne	94400	2016	1	Femelle	2	Tetrapoda	Mammalia	Rodentia	Myomorpha	Muridae	apodemus	Apodemus_sp	muroids	11.669	642	75
126	9925	9952	akasha_gabrielle_cogne	94400	2016	1	Femelle	2	Tetrapoda	Mammalia	Rodentia	Myomorpha	Muridae	apodemus	Apodemus_sp	muroids	11.669	642	75
127	9926	9953	akasha_gabrielle_cogne	94400	2016	1	Femelle	2	Tetrapoda	Mammalia	Rodentia	Myomorpha	Muridae	apodemus	Apodemus_sp	muroids	11.669	642	75
128	9927	9954	akasha_gabrielle_cogne	94400	2016	1	Femelle	2	Tetrapoda	Mammalia	Rodentia	Myomorpha	Muridae	apodemus	Apodemus_sp	muroids	11.669	642	75
129	18353	18388	akasha_gabrielle_cogne	94400	2016	6	Femelle	2	Tetrapoda	Mammalia	Rodentia	Myomorpha	Muridae	apodemus	Apodemus_sp	muroids	11.669	642	75
130	18354	18389	akasha_gabrielle_cogne	94400	2016	6	Femelle	2	Tetrapoda	Mammalia	Rodentia	Myomorpha	Muridae	apodemus	Apodemus_sp	muroids	11.669	642	75
131	18355	18390	akasha_gabrielle_cogne	94400	2016	6	Femelle	2	Tetrapoda	Mammalia	Rodentia	Myomorpha	Muridae	apodemus	Apodemus_sp	muroids	11.669	642	75
132	20159	20194	akasha_gabrielle_cogne	94400	2016	7	Femelle	2	Tetrapoda	Mammalia	Rodentia	Myomorpha	Muridae	apodemus	Apodemus_sp	muroids	11.669	642	75
133	20218	20253	akasha_gabrielle_cogne	94400	2016	7	Femelle	2	Tetrapoda	Mammalia	Rodentia	Myomorpha	Muridae	apodemus	Apodemus_sp	muroids	11.669	642	75
134	9921	9948	akasha_gabrielle_cogne	94400	2016	1	Femelle	2	Tetrapoda	Mammalia	Rodentia	Myomorpha	Muridae	apodemus	Apodemus_sp	muroids	10.5303	638	70
135	4324	4346	akasha_gabrielle_cogne	94400	2015	6	Femelle	1	Tetrapoda	Mammalia	Eulipotyphla	Soricidae	Soricidae	Soricidae_gen_sp	Soricidae_gen_sp	soricids	11.669	642	75
136	4446	4468	akasha_gabrielle_cogne	94400	2015	6	Femelle	1	Tetrapoda	Mammalia	Eulipotyphla	Soricidae	Soricidae	Soricidae_gen_sp	Soricidae_gen_sp	soricids	11.669	642	75
137	4447	4469	akasha_gabrielle_cogne	94400	2015	6	Femelle	1	Tetrapoda	Mammalia	Eulipotyphla	Soricidae	Soricidae	Soricidae_gen_sp	Soricidae_gen_sp	soricids	11.669	642	75
138	4452	4474	akasha_gabrielle_cogne	94400	2015	6	Femelle	1	Tetrapoda	Mammalia	Eulipotyphla	Soricidae	Soricidae	Soricidae_gen_sp	Soricidae_gen_sp	soricids	11.669	642	75
139	4453	4475	akasha_gabrielle_cogne	94400	2015	6	Femelle	1	Tetrapoda	Mammalia	Eulipotyphla	Soricidae	Soricidae	Soricidae_gen_sp	Soricidae_gen_sp	soricids	11.669	642	75
140	8508	8535	akasha_gabrielle_cogne	94400	2015	11	Femelle	1	Tetrapoda	Mammalia	Eulipotyphla	Soricidae	Soricidae	Soricidae_gen_sp	Soricidae_gen_sp	soricids	11.669	642	75
141	21673	21708	akasha_gabrielle_cogne	94400	2016	8	Femelle	2	Tetrapoda	Mammalia	Eulipotyphla	Soricidae	Soricidae	Soricidae_gen_sp	Soricidae_gen_sp	soricids	11.669	642	75
142	22651	22686	akasha_gabrielle_cogne	94400	2016	8	Femelle	2	Tetrapoda	Mammalia	Eulipotyphla	Soricidae	Soricidae	Soricidae_gen_sp	Soricidae_gen_sp	soricids	11.669	642	75
143	22652	22687	akasha_gabrielle_cogne	94400	2016	8	Femelle	2	Tetrapoda	Mammalia	Eulipotyphla	Soricidae	Soricidae	Soricidae_gen_sp	Soricidae_gen_sp	soricids	11.669	642	75
144	4455	4477	akasha_gabrielle_cogne	94400	2015	8	Femelle	1	Tetrapoda	Mammalia	Eulipotyphla	Soricidae	Soricidae	Soricidae_gen_sp	Soricidae_gen_sp	soricids	10.5303	638	70
145	22653	22688	akasha_gabrielle_cogne	94400	2016	9	Femelle	2	Tetrapoda	Mammalia	Rodentia	Myomorpha	Cricetidae	Cricetidae_gen_sp	Cricetidae_gen_sp	cricetids	11.669	642	75
146	32444	32479	alban_elodie_ibt	2400	2018	5	Male	2	Tetrapoda	Mammalia	Rodentia	Myomorpha	Cricetidae	arvicola	Arvicola_amphibius	cricetids	9.95575	646	76
147	32445	32480	alban_elodie_ibt	2400	2018	5	Male	2	Tetrapoda	Mammalia	Eulipotyphla	Soricidae	Soricidae	Soricidae_gen_sp	Soricidae_gen_sp	soricids	9.95575	646	76
148	32446	32481	alban_elodie_ibt	2400	2018	5	Male	2	Tetrapoda	Mammalia	Eulipotyphla	Soricidae	Soricidae	Soricidae_gen_sp	Soricidae_gen_sp	soricids	9.95575	646	76
149	32447	32482	alban_elodie_ibt	2400	2018	5	Male	2	Tetrapoda	Mammalia	Eulipotyphla	Soricidae	Soricidae	Soricidae_gen_sp	Soricidae_gen_sp	soricids	9.95575	646	76
150	31798	31833	alban_elodie_ibt	2400	2018	4	Male	2	Tetrapoda	Mammalia	Rodentia	Myomorpha	Muridae	mus	Mus_musculus	muroids	9.95575	646	76
151	29422	29457	albator_delphine_texier	35340	2017	7	Male	3	Tetrapoda	Amphibia	Anoura	Anoura	Ranidae	Ranidae_gen_sp	Ranidae_gen_sp	amphibians	11.1518	741	20
152	28710	28745	albator_delphine_texier	35340	2017	7	Male	3	Tetrapoda	Amphibia	Anoura	Anoura	Ranidae	pelophylax	Pelophylax_kl_esculentus	amphibians	11.1518	741	20
153	15484	15519	albator_delphine_texier	35340	2016	4	Male	1	Tetrapoda	Aves	Passeriformes	Passeri	Turdidae	turdus	Turdus_philomelos	passeriforms	11.1518	741	20
154	22580	22615	albator_delphine_texier	35340	2016	9	Male	2	Tetrapoda	Aves	Passeriformes	Passeri	Turdidae	turdus	Turdus_philomelos	passeriforms	11.1518	741	20
155	26963	26998	albator_delphine_texier	35340	2017	4	Male	3	Tetrapoda	Aves	Passeriformes	Passeri	Turdidae	turdus	Turdus_philomelos	passeriforms	11.1518	741	20
156	28363	28398	albator_delphine_texier	35340	2017	6	Male	3	Tetrapoda	Aves	Passeriformes	Passeri	Turdidae	turdus	Turdus_philomelos	passeriforms	11.1518	741	20
157	28364	28399	albator_delphine_texier	35340	2017	6	Male	3	Tetrapoda	Aves	Passeriformes	Passeri	Turdidae	turdus	Turdus_philomelos	passeriforms	11.1518	741	20
158	28709	28744	albator_delphine_texier	35340	2017	7	Male	3	Tetrapoda	Aves	Passeriformes	Passeri	Turdidae	turdus	Turdus_philomelos	passeriforms	11.1518	741	20
159	25378	25413	albator_delphine_texier	35340	2017	1	Male	3	Tetrapoda	Aves	Passeriformes	Passeri	Turdidae	turdus	Turdus_sp	passeriforms	11.1518	741	20
160	29421	29456	albator_delphine_texier	35340	2017	8	Male	3	Tetrapoda	Aves	Passeriformes	Passeri	Turdidae	turdus	Turdus_sp	passeriforms	11.1518	741	20
161	26260	26295	albator_delphine_texier	35340	2017	3	Male	3	Tetrapoda	Aves	Passeriformes	Passeri	Turdidae	turdus	Turdus_merula	passeriforms	11.1518	741	20
162	27208	27243	albator_delphine_texier	35340	2017	5	Male	3	Tetrapoda	Aves	Passeriformes	Passeri	Paridae	cyanistes	Cyanistes_caeruleus	passeriforms	11.1518	741	20
163	19714	19749	albator_delphine_texier	35340	2016	7	Male	2	Tetrapoda	Aves	Passeriformes	Passeri	Passeridae	passer	Passer_domesticus	passeriforms	11.1518	741	20
164	27929	27964	albator_delphine_texier	35340	2017	6	Male	3	Tetrapoda	Aves	Passeriformes	Passeri	Passeridae	passer	Passer_domesticus	passeriforms	11.1518	741	20
165	20286	20321	albator_delphine_texier	35340	2016	7	Male	2	Tetrapoda	Aves	Aves_ord_fam_gen_sp	Aves_ord_fam_gen_sp	Aves_ord_fam_gen_sp	Aves_ord_fam_gen_sp	Aves_ord_fam_gen_sp	other_birds	11.1518	741	20
166	15481	15516	albator_delphine_texier	35340	2016	5	Male	1	Tetrapoda	Aves	Aves_ord_fam_gen_sp	Aves_ord_fam_gen_sp	Aves_ord_fam_gen_sp	Aves_ord_fam_gen_sp	Aves_ord_fam_gen_sp	other_birds	11.1518	741	20
167	15482	15517	albator_delphine_texier	35340	2016	5	Male	1	Tetrapoda	Aves	Aves_ord_fam_gen_sp	Aves_ord_fam_gen_sp	Aves_ord_fam_gen_sp	Aves_ord_fam_gen_sp	Aves_ord_fam_gen_sp	other_birds	11.1518	741	20
168	15864	15899	albator_delphine_texier	35340	2016	5	Male	2	Tetrapoda	Aves	Aves_ord_fam_gen_sp	Aves_ord_fam_gen_sp	Aves_ord_fam_gen_sp	Aves_ord_fam_gen_sp	Aves_ord_fam_gen_sp	other_birds	11.1518	741	20
169	18496	18531	albator_delphine_texier	35340	2016	6	Male	2	Tetrapoda	Aves	Aves_ord_fam_gen_sp	Aves_ord_fam_gen_sp	Aves_ord_fam_gen_sp	Aves_ord_fam_gen_sp	Aves_ord_fam_gen_sp	other_birds	11.1518	741	20
170	26926	26961	albator_delphine_texier	35340	2017	4	Male	3	Tetrapoda	Aves	Aves_ord_fam_gen_sp	Aves_ord_fam_gen_sp	Aves_ord_fam_gen_sp	Aves_ord_fam_gen_sp	Aves_ord_fam_gen_sp	other_birds	11.1518	741	20
171	27300	27335	albator_delphine_texier	35340	2017	5	Male	3	Tetrapoda	Aves	Aves_ord_fam_gen_sp	Aves_ord_fam_gen_sp	Aves_ord_fam_gen_sp	Aves_ord_fam_gen_sp	Aves_ord_fam_gen_sp	other_birds	11.1518	741	20
172	27301	27336	albator_delphine_texier	35340	2017	5	Male	3	Tetrapoda	Aves	Aves_ord_fam_gen_sp	Aves_ord_fam_gen_sp	Aves_ord_fam_gen_sp	Aves_ord_fam_gen_sp	Aves_ord_fam_gen_sp	other_birds	11.1518	741	20
173	27741	27776	albator_delphine_texier	35340	2017	5	Male	3	Tetrapoda	Aves	Aves_ord_fam_gen_sp	Aves_ord_fam_gen_sp	Aves_ord_fam_gen_sp	Aves_ord_fam_gen_sp	Aves_ord_fam_gen_sp	other_birds	11.1518	741	20
174	29503	29538	albator_delphine_texier	35340	2017	8	Male	3	Tetrapoda	Aves	Aves_ord_fam_gen_sp	Aves_ord_fam_gen_sp	Aves_ord_fam_gen_sp	Aves_ord_fam_gen_sp	Aves_ord_fam_gen_sp	other_birds	11.1518	741	20
175	28350	28385	albator_delphine_texier	35340	2017	6	Male	3	Tetrapoda	Aves	Columbiformes	Columbiformes	Columbidae	columba	Columba_sp	other_birds	11.1518	741	20
176	25349	25384	albator_delphine_texier	35340	2017	1	Male	3	Tetrapoda	Aves	Passeriformes	Passeri	Muscicapidae	erithacus	Erithacus_rubecula	passeriforms	11.1518	741	20
177	28782	28817	albator_delphine_texier	35340	2017	7	Male	3	Tetrapoda	Aves	Passeriformes	Passeri	Muscicapidae	erithacus	Erithacus_rubecula	passeriforms	11.1518	741	20
178	15863	15898	albator_delphine_texier	35340	2016	5	Male	2	Tetrapoda	Mammalia	Rodentia	Myomorpha	Cricetidae	Cricetidae_gen_sp	Cricetidae_gen_sp	cricetids	11.1518	741	20
179	15936	15971	albator_delphine_texier	35340	2016	5	Male	2	Tetrapoda	Mammalia	Rodentia	Myomorpha	Cricetidae	Cricetidae_gen_sp	Cricetidae_gen_sp	cricetids	11.1518	741	20
180	15937	15972	albator_delphine_texier	35340	2016	5	Male	2	Tetrapoda	Mammalia	Rodentia	Myomorpha	Cricetidae	Cricetidae_gen_sp	Cricetidae_gen_sp	cricetids	11.1518	741	20
181	26261	26296	albator_delphine_texier	35340	2017	3	Male	3	Tetrapoda	Mammalia	Rodentia	Myomorpha	Cricetidae	Cricetidae_gen_sp	Cricetidae_gen_sp	cricetids	11.1518	741	20
182	27674	27709	albator_delphine_texier	35340	2017	5	Male	3	Tetrapoda	Mammalia	Rodentia	Myomorpha	Cricetidae	Cricetidae_gen_sp	Cricetidae_gen_sp	cricetids	11.1518	741	20
183	27675	27710	albator_delphine_texier	35340	2017	5	Male	3	Tetrapoda	Mammalia	Rodentia	Myomorpha	Cricetidae	Cricetidae_gen_sp	Cricetidae_gen_sp	cricetids	11.1518	741	20
184	27970	28005	albator_delphine_texier	35340	2017	6	Male	3	Tetrapoda	Mammalia	Rodentia	Myomorpha	Cricetidae	Cricetidae_gen_sp	Cricetidae_gen_sp	cricetids	11.1518	741	20
185	28536	28571	albator_delphine_texier	35340	2017	7	Male	3	Tetrapoda	Mammalia	Rodentia	Myomorpha	Cricetidae	Cricetidae_gen_sp	Cricetidae_gen_sp	cricetids	11.1518	741	20
186	27815	27850	albator_delphine_texier	35340	2017	5	Male	3	Tetrapoda	Mammalia	Rodentia	Myomorpha	Cricetidae	arvicola	Arvicola_sp	cricetids	11.1518	741	20
187	15866	15901	albator_delphine_texier	35340	2015	9	Male	1	Tetrapoda	Mammalia	Lagomorpha	Leporidae	Leporidae	oryctolagus	Oryctolagus_cuniculus	other_mammals	11.1518	741	20
188	18374	18409	albator_delphine_texier	35340	2016	6	Male	2	Tetrapoda	Mammalia	Mammalia_ord_fam_gen_sp	Mammalia_ord_fam_gen_sp	Mammalia_ord_fam_gen_sp	Mammalia_ord_fam_gen_sp	Mammalia_ord_fam_gen_sp	other_mammals	11.1518	741	20
189	18668	18703	albator_delphine_texier	35340	2016	6	Male	2	Tetrapoda	Mammalia	Mammalia_ord_fam_gen_sp	Mammalia_ord_fam_gen_sp	Mammalia_ord_fam_gen_sp	Mammalia_ord_fam_gen_sp	Mammalia_ord_fam_gen_sp	other_mammals	11.1518	741	20
190	19321	19356	albator_delphine_texier	35340	2016	7	Male	2	Tetrapoda	Mammalia	Mammalia_ord_fam_gen_sp	Mammalia_ord_fam_gen_sp	Mammalia_ord_fam_gen_sp	Mammalia_ord_fam_gen_sp	Mammalia_ord_fam_gen_sp	other_mammals	11.1518	741	20
191	22723	22758	albator_delphine_texier	35340	2016	9	Male	2	Tetrapoda	Mammalia	Mammalia_ord_fam_gen_sp	Mammalia_ord_fam_gen_sp	Mammalia_ord_fam_gen_sp	Mammalia_ord_fam_gen_sp	Mammalia_ord_fam_gen_sp	other_mammals	11.1518	741	20
192	23702	23737	albator_delphine_texier	35340	2016	10	Male	2	Tetrapoda	Mammalia	Mammalia_ord_fam_gen_sp	Mammalia_ord_fam_gen_sp	Mammalia_ord_fam_gen_sp	Mammalia_ord_fam_gen_sp	Mammalia_ord_fam_gen_sp	other_mammals	11.1518	741	20
193	24121	24156	albator_delphine_texier	35340	2016	11	Male	2	Tetrapoda	Mammalia	Mammalia_ord_fam_gen_sp	Mammalia_ord_fam_gen_sp	Mammalia_ord_fam_gen_sp	Mammalia_ord_fam_gen_sp	Mammalia_ord_fam_gen_sp	other_mammals	11.1518	741	20
194	27966	28001	albator_delphine_texier	35340	2017	6	Male	3	Tetrapoda	Mammalia	Mammalia_ord_fam_gen_sp	Mammalia_ord_fam_gen_sp	Mammalia_ord_fam_gen_sp	Mammalia_ord_fam_gen_sp	Mammalia_ord_fam_gen_sp	other_mammals	11.1518	741	20
195	28295	28330	albator_delphine_texier	35340	2017	6	Male	3	Tetrapoda	Mammalia	Mammalia_ord_fam_gen_sp	Mammalia_ord_fam_gen_sp	Mammalia_ord_fam_gen_sp	Mammalia_ord_fam_gen_sp	Mammalia_ord_fam_gen_sp	other_mammals	11.1518	741	20
196	16863	16898	albator_delphine_texier	35340	2016	6	Male	2	Tetrapoda	Mammalia	Mammalia_ord_fam_gen_sp	Mammalia_ord_fam_gen_sp	Mammalia_ord_fam_gen_sp	Mammalia_ord_fam_gen_sp	Mammalia_ord_fam_gen_sp	other_mammals	11.1518	741	20
197	17141	17176	albator_delphine_texier	35340	2016	6	Male	2	Tetrapoda	Mammalia	Mammalia_ord_fam_gen_sp	Mammalia_ord_fam_gen_sp	Mammalia_ord_fam_gen_sp	Mammalia_ord_fam_gen_sp	Mammalia_ord_fam_gen_sp	other_mammals	11.1518	741	20
198	16864	16899	albator_delphine_texier	35340	2016	6	Male	2	Tetrapoda	Mammalia	Mammalia_ord_fam_gen_sp	Mammalia_ord_fam_gen_sp	Mammalia_ord_fam_gen_sp	Mammalia_ord_fam_gen_sp	Mammalia_ord_fam_gen_sp	other_mammals	11.1518	741	20
199	15478	15513	albator_delphine_texier	35340	2016	5	Male	1	Tetrapoda	Mammalia	Eulipotyphla	Soricidae	Soricidae	Soricidae_gen_sp	Soricidae_gen_sp	soricids	11.1518	741	20
200	22102	22137	albator_delphine_texier	35340	2016	8	Male	2	Tetrapoda	Mammalia	Eulipotyphla	Soricidae	Soricidae	Soricidae_gen_sp	Soricidae_gen_sp	soricids	11.1518	741	20
201	23581	23616	albator_delphine_texier	35340	2016	10	Male	2	Tetrapoda	Mammalia	Eulipotyphla	Soricidae	Soricidae	Soricidae_gen_sp	Soricidae_gen_sp	soricids	11.1518	741	20
202	24383	24418	albator_delphine_texier	35340	2016	11	Male	2	Tetrapoda	Mammalia	Eulipotyphla	Soricidae	Soricidae	Soricidae_gen_sp	Soricidae_gen_sp	soricids	11.1518	741	20
203	24790	24825	albator_delphine_texier	35340	2016	12	Male	2	Tetrapoda	Mammalia	Eulipotyphla	Soricidae	Soricidae	Soricidae_gen_sp	Soricidae_gen_sp	soricids	11.1518	741	20
204	25568	25603	albator_delphine_texier	35340	2017	1	Male	3	Tetrapoda	Mammalia	Eulipotyphla	Soricidae	Soricidae	Soricidae_gen_sp	Soricidae_gen_sp	soricids	11.1518	741	20
205	25965	26000	albator_delphine_texier	35340	2017	3	Male	3	Tetrapoda	Mammalia	Eulipotyphla	Soricidae	Soricidae	Soricidae_gen_sp	Soricidae_gen_sp	soricids	11.1518	741	20
206	25966	26001	albator_delphine_texier	35340	2017	3	Male	3	Tetrapoda	Mammalia	Eulipotyphla	Soricidae	Soricidae	Soricidae_gen_sp	Soricidae_gen_sp	soricids	11.1518	741	20
207	27207	27242	albator_delphine_texier	35340	2017	5	Male	3	Tetrapoda	Mammalia	Eulipotyphla	Soricidae	Soricidae	Soricidae_gen_sp	Soricidae_gen_sp	soricids	11.1518	741	20
208	28425	28460	albator_delphine_texier	35340	2017	6	Male	3	Tetrapoda	Mammalia	Eulipotyphla	Soricidae	Soricidae	Soricidae_gen_sp	Soricidae_gen_sp	soricids	11.1518	741	20
209	28471	28506	albator_delphine_texier	35340	2017	6	Male	3	Tetrapoda	Mammalia	Eulipotyphla	Soricidae	Soricidae	Soricidae_gen_sp	Soricidae_gen_sp	soricids	11.1518	741	20
210	28744	28779	albator_delphine_texier	35340	2017	7	Male	3	Tetrapoda	Mammalia	Eulipotyphla	Soricidae	Soricidae	Soricidae_gen_sp	Soricidae_gen_sp	soricids	11.1518	741	20
211	29746	29781	albator_delphine_texier	35340	2017	8	Male	3	Tetrapoda	Mammalia	Eulipotyphla	Soricidae	Soricidae	Soricidae_gen_sp	Soricidae_gen_sp	soricids	11.1518	741	20
212	20287	20322	albator_delphine_texier	35340	2016	7	Male	2	Tetrapoda	Mammalia	Rodentia	Myomorpha	Cricetidae	Cricetidae_gen_sp	Cricetidae_gen_sp	cricetids	11.1518	741	20
213	15477	15512	albator_delphine_texier	35340	2016	5	Male	1	Tetrapoda	Mammalia	Rodentia	Myomorpha	Cricetidae	Cricetidae_gen_sp	Cricetidae_gen_sp	cricetids	11.1518	741	20
214	15507	15542	albator_delphine_texier	35340	2016	5	Male	2	Tetrapoda	Mammalia	Rodentia	Myomorpha	Cricetidae	Cricetidae_gen_sp	Cricetidae_gen_sp	cricetids	11.1518	741	20
215	15526	15561	albator_delphine_texier	35340	2016	5	Male	2	Tetrapoda	Mammalia	Rodentia	Myomorpha	Cricetidae	Cricetidae_gen_sp	Cricetidae_gen_sp	cricetids	11.1518	741	20
216	15865	15900	albator_delphine_texier	35340	2016	5	Male	2	Tetrapoda	Mammalia	Rodentia	Myomorpha	Cricetidae	Cricetidae_gen_sp	Cricetidae_gen_sp	cricetids	11.1518	741	20
217	16354	16389	albator_delphine_texier	35340	2016	5	Male	2	Tetrapoda	Mammalia	Rodentia	Myomorpha	Cricetidae	Cricetidae_gen_sp	Cricetidae_gen_sp	cricetids	11.1518	741	20
218	16355	16390	albator_delphine_texier	35340	2016	5	Male	2	Tetrapoda	Mammalia	Rodentia	Myomorpha	Cricetidae	Cricetidae_gen_sp	Cricetidae_gen_sp	cricetids	11.1518	741	20
219	16356	16391	albator_delphine_texier	35340	2016	5	Male	2	Tetrapoda	Mammalia	Rodentia	Myomorpha	Cricetidae	Cricetidae_gen_sp	Cricetidae_gen_sp	cricetids	11.1518	741	20
220	16744	16779	albator_delphine_texier	35340	2016	6	Male	2	Tetrapoda	Mammalia	Rodentia	Myomorpha	Cricetidae	Cricetidae_gen_sp	Cricetidae_gen_sp	cricetids	11.1518	741	20
221	16865	16900	albator_delphine_texier	35340	2016	6	Male	2	Tetrapoda	Mammalia	Rodentia	Myomorpha	Cricetidae	Cricetidae_gen_sp	Cricetidae_gen_sp	cricetids	11.1518	741	20
222	17139	17174	albator_delphine_texier	35340	2016	6	Male	2	Tetrapoda	Mammalia	Rodentia	Myomorpha	Cricetidae	Cricetidae_gen_sp	Cricetidae_gen_sp	cricetids	11.1518	741	20
223	17142	17177	albator_delphine_texier	35340	2016	6	Male	2	Tetrapoda	Mammalia	Rodentia	Myomorpha	Cricetidae	Cricetidae_gen_sp	Cricetidae_gen_sp	cricetids	11.1518	741	20
224	17417	17452	albator_delphine_texier	35340	2016	6	Male	2	Tetrapoda	Mammalia	Rodentia	Myomorpha	Cricetidae	Cricetidae_gen_sp	Cricetidae_gen_sp	cricetids	11.1518	741	20
225	18001	18036	albator_delphine_texier	35340	2016	6	Male	2	Tetrapoda	Mammalia	Rodentia	Myomorpha	Cricetidae	Cricetidae_gen_sp	Cricetidae_gen_sp	cricetids	11.1518	741	20
226	18003	18038	albator_delphine_texier	35340	2016	6	Male	2	Tetrapoda	Mammalia	Rodentia	Myomorpha	Cricetidae	Cricetidae_gen_sp	Cricetidae_gen_sp	cricetids	11.1518	741	20
227	18375	18410	albator_delphine_texier	35340	2016	6	Male	2	Tetrapoda	Mammalia	Rodentia	Myomorpha	Cricetidae	Cricetidae_gen_sp	Cricetidae_gen_sp	cricetids	11.1518	741	20
228	18543	18578	albator_delphine_texier	35340	2016	6	Male	2	Tetrapoda	Mammalia	Rodentia	Myomorpha	Cricetidae	Cricetidae_gen_sp	Cricetidae_gen_sp	cricetids	11.1518	741	20
229	19227	19262	albator_delphine_texier	35340	2016	7	Male	2	Tetrapoda	Mammalia	Rodentia	Myomorpha	Cricetidae	Cricetidae_gen_sp	Cricetidae_gen_sp	cricetids	11.1518	741	20
230	19228	19263	albator_delphine_texier	35340	2016	7	Male	2	Tetrapoda	Mammalia	Rodentia	Myomorpha	Cricetidae	Cricetidae_gen_sp	Cricetidae_gen_sp	cricetids	11.1518	741	20
231	19618	19653	albator_delphine_texier	35340	2016	7	Male	2	Tetrapoda	Mammalia	Rodentia	Myomorpha	Cricetidae	Cricetidae_gen_sp	Cricetidae_gen_sp	cricetids	11.1518	741	20
232	19619	19654	albator_delphine_texier	35340	2016	7	Male	2	Tetrapoda	Mammalia	Rodentia	Myomorpha	Cricetidae	Cricetidae_gen_sp	Cricetidae_gen_sp	cricetids	11.1518	741	20
233	21830	21865	albator_delphine_texier	35340	2016	8	Male	2	Tetrapoda	Mammalia	Rodentia	Myomorpha	Cricetidae	Cricetidae_gen_sp	Cricetidae_gen_sp	cricetids	11.1518	741	20
234	21831	21866	albator_delphine_texier	35340	2016	8	Male	2	Tetrapoda	Mammalia	Rodentia	Myomorpha	Cricetidae	Cricetidae_gen_sp	Cricetidae_gen_sp	cricetids	11.1518	741	20
235	22184	22219	albator_delphine_texier	35340	2016	9	Male	2	Tetrapoda	Mammalia	Rodentia	Myomorpha	Cricetidae	Cricetidae_gen_sp	Cricetidae_gen_sp	cricetids	11.1518	741	20
236	22267	22302	albator_delphine_texier	35340	2016	9	Male	2	Tetrapoda	Mammalia	Rodentia	Myomorpha	Cricetidae	Cricetidae_gen_sp	Cricetidae_gen_sp	cricetids	11.1518	741	20
237	22548	22583	albator_delphine_texier	35340	2016	9	Male	2	Tetrapoda	Mammalia	Rodentia	Myomorpha	Cricetidae	Cricetidae_gen_sp	Cricetidae_gen_sp	cricetids	11.1518	741	20
238	22549	22584	albator_delphine_texier	35340	2016	9	Male	2	Tetrapoda	Mammalia	Rodentia	Myomorpha	Cricetidae	Cricetidae_gen_sp	Cricetidae_gen_sp	cricetids	11.1518	741	20
239	23701	23736	albator_delphine_texier	35340	2016	10	Male	2	Tetrapoda	Mammalia	Rodentia	Myomorpha	Cricetidae	Cricetidae_gen_sp	Cricetidae_gen_sp	cricetids	11.1518	741	20
240	24791	24826	albator_delphine_texier	35340	2016	12	Male	2	Tetrapoda	Mammalia	Rodentia	Myomorpha	Cricetidae	Cricetidae_gen_sp	Cricetidae_gen_sp	cricetids	11.1518	741	20
241	27510	27545	albator_delphine_texier	35340	2017	5	Male	3	Tetrapoda	Mammalia	Rodentia	Myomorpha	Muroidea_fam_gen_sp	Muroidea_fam_gen_sp	Muroidea_fam_gen_sp	muroids	11.1518	741	20
242	27615	27650	albator_delphine_texier	35340	2017	5	Male	3	Tetrapoda	Mammalia	Rodentia	Myomorpha	Muroidea_fam_gen_sp	Muroidea_fam_gen_sp	Muroidea_fam_gen_sp	muroids	11.1518	741	20
243	27616	27651	albator_delphine_texier	35340	2017	5	Male	3	Tetrapoda	Mammalia	Rodentia	Myomorpha	Muroidea_fam_gen_sp	Muroidea_fam_gen_sp	Muroidea_fam_gen_sp	muroids	11.1518	741	20
244	23608	23643	albator_delphine_texier	35340	2016	10	Male	2	Tetrapoda	Mammalia	Rodentia	Myomorpha	Muridae	rattus	Rattus_norvegicus	muroids	11.1518	741	20
245	17420	17455	albator_delphine_texier	35340	2016	6	Male	2	Tetrapoda	Mammalia	Rodentia	Myomorpha	Muridae	mus	Mus_musculus	muroids	11.1518	741	20
246	19320	19355	albator_delphine_texier	35340	2016	7	Male	2	Tetrapoda	Mammalia	Rodentia	Myomorpha	Muridae	mus	Mus_musculus	muroids	11.1518	741	20
247	24384	24419	albator_delphine_texier	35340	2016	11	Male	2	Tetrapoda	Mammalia	Rodentia	Myomorpha	Muridae	mus	Mus_musculus	muroids	11.1518	741	20
248	27509	27544	albator_delphine_texier	35340	2017	5	Male	3	Tetrapoda	Mammalia	Rodentia	Myomorpha	Muridae	mus	Mus_musculus	muroids	11.1518	741	20
249	27511	27546	albator_delphine_texier	35340	2017	5	Male	3	Tetrapoda	Mammalia	Rodentia	Myomorpha	Muridae	mus	Mus_musculus	muroids	11.1518	741	20
250	28294	28329	albator_delphine_texier	35340	2017	6	Male	3	Tetrapoda	Mammalia	Rodentia	Myomorpha	Muridae	mus	Mus_musculus	muroids	11.1518	741	20
251	29747	29782	albator_delphine_texier	35340	2017	8	Male	3	Tetrapoda	Mammalia	Rodentia	Myomorpha	Muridae	mus	Mus_musculus	muroids	11.1518	741	20
252	16438	16473	albator_delphine_texier	35340	2016	5	Male	2	Tetrapoda	Mammalia	Eulipotyphla	Talpidae	Talpidae	talpa	Talpa_sp	other_mammals	11.1518	741	20
253	21947	21982	albator_delphine_texier	35340	2016	8	Male	2	Tetrapoda	Mammalia	Eulipotyphla	Talpidae	Talpidae	talpa	Talpa_sp	other_mammals	11.1518	741	20
254	23582	23617	albator_delphine_texier	35340	2016	10	Male	2	Tetrapoda	Mammalia	Eulipotyphla	Talpidae	Talpidae	talpa	Talpa_sp	other_mammals	11.1518	741	20
255	26312	26347	albator_delphine_texier	35340	2017	3	Male	3	Tetrapoda	Mammalia	Eulipotyphla	Talpidae	Talpidae	talpa	Talpa_sp	other_mammals	11.1518	741	20
256	27614	27649	albator_delphine_texier	35340	2017	5	Male	3	Tetrapoda	Mammalia	Eulipotyphla	Talpidae	Talpidae	talpa	Talpa_sp	other_mammals	11.1518	741	20
257	27673	27708	albator_delphine_texier	35340	2017	5	Male	3	Tetrapoda	Mammalia	Eulipotyphla	Talpidae	Talpidae	talpa	Talpa_sp	other_mammals	11.1518	741	20
258	27927	27962	albator_delphine_texier	35340	2017	6	Male	3	Tetrapoda	Mammalia	Eulipotyphla	Talpidae	Talpidae	talpa	Talpa_sp	other_mammals	11.1518	741	20
259	28743	28778	albator_delphine_texier	35340	2017	7	Male	3	Tetrapoda	Mammalia	Eulipotyphla	Talpidae	Talpidae	talpa	Talpa_sp	other_mammals	11.1518	741	20
260	29420	29455	albator_delphine_texier	35340	2017	8	Male	3	Tetrapoda	Mammalia	Eulipotyphla	Talpidae	Talpidae	talpa	Talpa_sp	other_mammals	11.1518	741	20
261	7574	7601	albert_judith_ducau	85440	2015	11	Male	2	Tetrapoda	Mammalia	Rodentia	Myomorpha	Muroidea_fam_gen_sp	Muroidea_fam_gen_sp	Muroidea_fam_gen_sp	muroids	11.0446	772	32
262	7792	7819	albert_judith_ducau	85440	2015	11	Male	2	Tetrapoda	Mammalia	Rodentia	Myomorpha	Muroidea_fam_gen_sp	Muroidea_fam_gen_sp	Muroidea_fam_gen_sp	muroids	11.0446	772	32
263	9901	9928	albert_judith_ducau	85440	2016	1	Male	3	Tetrapoda	Mammalia	Rodentia	Myomorpha	Muroidea_fam_gen_sp	Muroidea_fam_gen_sp	Muroidea_fam_gen_sp	muroids	11.0446	772	32
264	18539	18574	albert_judith_ducau	85440	2016	6	Male	3	Tetrapoda	Mammalia	Rodentia	Myomorpha	Muroidea_fam_gen_sp	Muroidea_fam_gen_sp	Muroidea_fam_gen_sp	muroids	11.0446	772	32
265	21229	21264	albert_judith_ducau	85440	2016	8	Male	3	Tetrapoda	Mammalia	Rodentia	Myomorpha	Muroidea_fam_gen_sp	Muroidea_fam_gen_sp	Muroidea_fam_gen_sp	muroids	11.0446	772	32
266	23646	23681	albert_judith_ducau	85440	2016	10	Male	3	Tetrapoda	Mammalia	Rodentia	Myomorpha	Muroidea_fam_gen_sp	Muroidea_fam_gen_sp	Muroidea_fam_gen_sp	muroids	11.0446	772	32
267	25706	25741	albert_judith_ducau	85440	2016	11	Male	3	Tetrapoda	Mammalia	Rodentia	Myomorpha	Muroidea_fam_gen_sp	Muroidea_fam_gen_sp	Muroidea_fam_gen_sp	muroids	11.0446	772	32
268	25707	25742	albert_judith_ducau	85440	2017	2	Male	4	Tetrapoda	Mammalia	Rodentia	Myomorpha	Muroidea_fam_gen_sp	Muroidea_fam_gen_sp	Muroidea_fam_gen_sp	muroids	11.0446	772	32
269	11077	11112	aldo_aurelie_dehez	34400	2016	2	Male	1	Tetrapoda	Aves	Passeriformes	Passeri	Sturnidae	sturnus	Sturnus_vulgaris	passeriforms	14.7986	691	59
270	11078	11113	aldo_aurelie_dehez	34400	2016	2	Male	1	Tetrapoda	Aves	Passeriformes	Passeri	Sturnidae	sturnus	Sturnus_vulgaris	passeriforms	14.7986	691	59
271	11079	11114	aldo_aurelie_dehez	34400	2016	2	Male	1	Tetrapoda	Squamata	Squamata	Lacertilia	Lacertidae	podarcis	Podarcis_muralis	lacertilia	14.7986	691	59
272	19717	19752	aldo_magali_hidalgo	44690	2016	7	Male	3	Tetrapoda	Aves	Passeriformes	Passeri	Troglodytidae	troglodytes	Troglodytes_troglodytes	passeriforms	11.7894	773	76
273	3583	3605	alf_sylvie_caillault	18220	2015	9	Male	10	Tetrapoda	Mammalia	Rodentia	Myomorpha	Muridae	mus	Mus_musculus	muroids	10.6824	734	35
274	4652	4674	alfred_herve_debar	51370	2015	9	Male	8	Tetrapoda	Mammalia	Rodentia	Myomorpha	Cricetidae	Cricetidae_gen_sp	Cricetidae_gen_sp	cricetids	10.2439	623	84
275	16149	16184	alfred_raphaelle_caubriere	56610	2016	5	Male	13	Tetrapoda	Aves	Passeriformes	Passeri_fam_gen_sp	Passeri_fam_gen_sp	Passeri_fam_gen_sp	Passeri_fam_gen_sp	passeriforms	12.4462	865	64
276	15201	15236	alfred_raphaelle_caubriere	56610	2016	5	Male	13	Tetrapoda	Aves	Passeriformes	Passeri	Muscicapidae	erithacus	Erithacus_rubecula	passeriforms	12.4462	865	64
277	14679	14714	alfred_raphaelle_caubriere	56610	2016	5	Male	13	Tetrapoda	Aves	Passeriformes	Passeri	Fringillidae	carduelis	Carduelis_chloris	passeriforms	12.4462	865	64
278	15130	15165	alfred_raphaelle_caubriere	56610	2016	5	Male	13	Tetrapoda	Mammalia	Rodentia	Myomorpha	Muridae	mus	Mus_musculus	muroids	12.4462	865	64
279	15595	15630	alfred_raphaelle_caubriere	56610	2016	5	Male	13	Tetrapoda	Mammalia	Rodentia	Myomorpha	Muridae	mus	Mus_musculus	muroids	12.4462	865	64
280	16148	16183	alfred_raphaelle_caubriere	56610	2016	5	Male	13	Tetrapoda	Mammalia	Rodentia	Myomorpha	Muridae	mus	Mus_musculus	muroids	12.4462	865	64
281	14838	14873	alfred_raphaelle_caubriere	56610	2016	5	Male	13	Tetrapoda	Mammalia	Rodentia	Myomorpha	Muridae	mus	Mus_musculus	muroids	12.4462	865	64
282	14680	14715	alfred_raphaelle_caubriere	56610	2016	5	Male	13	Tetrapoda	Mammalia	Rodentia	Myomorpha	Muridae	mus	Mus_musculus	muroids	12.4462	865	64
283	14894	14929	ali_laura_monnier	44260	2016	5	Male	1	Tetrapoda	Aves	Passeriformes	Passeri	Passeridae	passer	Passer_domesticus	passeriforms	12.0625	798	76
284	13007	13042	ali_laura_monnier	44260	2016	1	Male	1	Tetrapoda	Aves	Passeriformes	Passeri	Passeridae	passer	Passer_domesticus	passeriforms	12.0625	798	76
285	NA	NA	allien_fanny_leprovost	50140	2021	5	Femelle	0	Tetrapoda	Aves	Passeriformes	Passeri	Fringillidae	fringilla	Fringilla_coelebs	passeriforms	10.5404	827	26
286	NA	NA	allien_fanny_leprovost	50140	2022	8	Femelle	0	Tetrapoda	Aves	Passeriformes	Passeri	Muscicapidae	erithacus	Erithacus_rubecula	passeriforms	10.5404	827	26
287	NA	NA	allien_fanny_leprovost	50140	2021	1	Femelle	0	Tetrapoda	Mammalia	Rodentia	Myomorpha	Cricetidae	arvicola	Arvicola_amphibius	cricetids	10.5404	827	26
288	NA	NA	allien_fanny_leprovost	50140	2021	6	Femelle	0	Tetrapoda	Mammalia	Rodentia	Myomorpha	Cricetidae	microtus	Microtus_arvalis	cricetids	10.5404	827	26
289	NA	NA	allien_fanny_leprovost	50140	2021	11	Femelle	0	Tetrapoda	Mammalia	Rodentia	Myomorpha	Cricetidae	microtus	Microtus_arvalis	cricetids	10.5404	827	26
290	NA	NA	allien_fanny_leprovost	50140	2022	8	Femelle	0	Tetrapoda	Mammalia	Lagomorpha	Leporidae	Leporidae	oryctolagus	Oryctolagus_cuniculus	other_mammals	10.5404	827	26
291	NA	NA	allien_fanny_leprovost	50140	2022	8	Femelle	0	Tetrapoda	Mammalia	Lagomorpha	Leporidae	Leporidae	oryctolagus	Oryctolagus_cuniculus	other_mammals	10.5404	827	26
292	NA	NA	allien_fanny_leprovost	50140	2021	8	Femelle	0	Tetrapoda	Mammalia	Lagomorpha	Leporidae	Leporidae	oryctolagus	Oryctolagus_cuniculus	other_mammals	10.5404	827	26
293	NA	NA	allien_fanny_leprovost	50140	2022	8	Femelle	0	Tetrapoda	Mammalia	Lagomorpha	Leporidae	Leporidae	oryctolagus	Oryctolagus_cuniculus	other_mammals	10.5404	827	26
294	NA	NA	allien_fanny_leprovost	50140	2021	8	Femelle	0	Tetrapoda	Mammalia	Lagomorpha	Leporidae	Leporidae	oryctolagus	Oryctolagus_cuniculus	other_mammals	10.5404	827	26
295	NA	NA	allien_fanny_leprovost	50140	2022	7	Femelle	0	Tetrapoda	Mammalia	Lagomorpha	Leporidae	Leporidae	oryctolagus	Oryctolagus_cuniculus	other_mammals	10.5404	827	26
296	NA	NA	allien_fanny_leprovost	50140	2020	10	Femelle	0	Tetrapoda	Mammalia	Rodentia	Myomorpha	Muridae	apodemus	Apodemus_sp	muroids	10.5404	827	26
297	NA	NA	allien_fanny_leprovost	50140	2020	10	Femelle	0	Tetrapoda	Mammalia	Rodentia	Myomorpha	Muridae	apodemus	Apodemus_sp	muroids	10.5404	827	26
298	NA	NA	allien_fanny_leprovost	50140	2021	6	Femelle	0	Tetrapoda	Mammalia	Rodentia	Myomorpha	Muridae	apodemus	Apodemus_sp	muroids	10.5404	827	26
299	NA	NA	allien_fanny_leprovost	50140	2021	5	Femelle	0	Tetrapoda	Mammalia	Rodentia	Myomorpha	Muridae	apodemus	Apodemus_sp	muroids	10.5404	827	26
300	NA	NA	allien_fanny_leprovost	50140	2021	8	Femelle	0	Tetrapoda	Mammalia	Rodentia	Myomorpha	Muridae	apodemus	Apodemus_sp	muroids	10.5404	827	26
301	NA	NA	allien_fanny_leprovost	50140	2022	3	Femelle	0	Tetrapoda	Mammalia	Rodentia	Myomorpha	Muridae	apodemus	Apodemus_sp	muroids	10.5404	827	26
302	NA	NA	allien_fanny_leprovost	50140	2021	5	Femelle	0	Tetrapoda	Mammalia	Rodentia	Myomorpha	Muridae	apodemus	Apodemus_sp	muroids	10.5404	827	26
303	NA	NA	allien_fanny_leprovost	50140	2021	5	Femelle	0	Tetrapoda	Mammalia	Rodentia	Myomorpha	Muridae	apodemus	Apodemus_sp	muroids	10.5404	827	26
304	NA	NA	allien_fanny_leprovost	50140	2021	8	Femelle	0	Tetrapoda	Mammalia	Rodentia	Myomorpha	Muridae	apodemus	Apodemus_sp	muroids	10.5404	827	26
305	NA	NA	allien_fanny_leprovost	50140	2021	10	Femelle	0	Tetrapoda	Mammalia	Rodentia	Myomorpha	Muridae	apodemus	Apodemus_sp	muroids	10.5404	827	26
306	NA	NA	allien_fanny_leprovost	50140	2021	9	Femelle	0	Tetrapoda	Mammalia	Rodentia	Myomorpha	Muridae	apodemus	Apodemus_sp	muroids	10.5404	827	26
307	NA	NA	allien_fanny_leprovost	50140	2021	8	Femelle	0	Tetrapoda	Mammalia	Rodentia	Myomorpha	Muridae	apodemus	Apodemus_sp	muroids	10.5404	827	26
308	NA	NA	allien_fanny_leprovost	50140	2021	5	Femelle	0	Tetrapoda	Mammalia	Rodentia	Myomorpha	Muridae	apodemus	Apodemus_sp	muroids	10.5404	827	26
309	NA	NA	allien_fanny_leprovost	50140	2021	8	Femelle	0	Tetrapoda	Mammalia	Rodentia	Myomorpha	Muridae	apodemus	Apodemus_sp	muroids	10.5404	827	26
310	NA	NA	allien_fanny_leprovost	50140	2021	5	Femelle	0	Tetrapoda	Mammalia	Rodentia	Myomorpha	Muridae	apodemus	Apodemus_sp	muroids	10.5404	827	26
311	NA	NA	allien_fanny_leprovost	50140	2021	5	Femelle	0	Tetrapoda	Mammalia	Rodentia	Myomorpha	Muridae	apodemus	Apodemus_sp	muroids	10.5404	827	26
312	NA	NA	allien_fanny_leprovost	50140	2021	2	Femelle	0	Tetrapoda	Mammalia	Rodentia	Myomorpha	Cricetidae	Cricetidae_gen_sp	Cricetidae_gen_sp	cricetids	10.5404	827	39
313	NA	NA	allien_fanny_leprovost	50140	2021	4	Femelle	0	Tetrapoda	Mammalia	Rodentia	Myomorpha	Muroidea_fam_gen_sp	Muroidea_fam_gen_sp	Muroidea_fam_gen_sp	muroids	10.5404	827	26
314	NA	NA	allien_fanny_leprovost	50140	2021	8	Femelle	0	Tetrapoda	Mammalia	Rodentia	Myomorpha	Cricetidae	Cricetidae_gen_sp	Cricetidae_gen_sp	cricetids	10.5404	827	26
315	NA	NA	allien_fanny_leprovost	50140	2021	10	Femelle	0	Tetrapoda	Mammalia	Rodentia	Myomorpha	Cricetidae	Cricetidae_gen_sp	Cricetidae_gen_sp	cricetids	10.5404	827	26
316	NA	NA	allien_fanny_leprovost	50140	2022	6	Femelle	0	Tetrapoda	Mammalia	Rodentia	Myomorpha	Cricetidae	Cricetidae_gen_sp	Cricetidae_gen_sp	cricetids	10.5404	827	26
317	NA	NA	allien_fanny_leprovost	50140	2021	4	Femelle	0	Tetrapoda	Mammalia	Rodentia	Myomorpha	Cricetidae	Cricetidae_gen_sp	Cricetidae_gen_sp	cricetids	10.5404	827	39
318	NA	NA	allien_fanny_leprovost	50140	2021	4	Femelle	0	Tetrapoda	Mammalia	Rodentia	Myomorpha	Muroidea_fam_gen_sp	Muroidea_fam_gen_sp	Muroidea_fam_gen_sp	muroids	10.5404	827	26
319	NA	NA	allien_fanny_leprovost	50140	2020	10	Femelle	0	Tetrapoda	Squamata	Squamata	Lacertilia	Anguidae	anguis	Anguis_fragilis	lacertilia	10.5404	827	26
320	38377	Leprovost_01_09_20_03_09_20	allien_fanny_leprovost	50140	2020	9	Femelle	7	Tetrapoda	Aves	Passeriformes	Passeri	Emberizidae	emberiza	Emberiza_citrinella	passeriforms	10.5404	827	26
321	26612	26647	allien_fanny_leprovost	50140	2017	4	Femelle	4	Tetrapoda	Aves	Passeriformes	Passeri	Sturnidae	sturnus	Sturnus_vulgaris	passeriforms	10.5404	827	26
322	26613	26648	allien_fanny_leprovost	50140	2017	4	Femelle	4	Tetrapoda	Aves	Passeriformes	Passeri	Sturnidae	sturnus	Sturnus_vulgaris	passeriforms	10.5404	827	26
323	8683	8710	allien_fanny_leprovost	50140	2015	12	Femelle	2	Tetrapoda	Aves	Galliformes	Phasiani	Phasianidae	phasianus	Phasianus_colchicus	other_birds	10.5404	827	26
324	7717	7744	allien_fanny_leprovost	50140	2015	11	Femelle	2	Tetrapoda	Aves	Passeriformes	Passeri	Paridae	cyanistes	Cyanistes_caeruleus	passeriforms	10.5404	827	26
325	8032	8059	allien_fanny_leprovost	50140	2015	11	Femelle	2	Tetrapoda	Aves	Passeriformes	Passeri	Passeridae	passer	Passer_domesticus	passeriforms	10.5404	827	26
326	28367	28402	allien_fanny_leprovost	50140	2017	6	Femelle	4	Tetrapoda	Aves	Passeriformes	Passeri	Passeridae	passer	Passer_domesticus	passeriforms	10.5404	827	26
327	5964	5986	allien_fanny_leprovost	50140	2015	10	Femelle	2	Tetrapoda	Aves	Passeriformes	Passeri	Passeridae	passer	Passer_sp	passeriforms	10.5404	827	26
328	6536	6558	allien_fanny_leprovost	50140	2015	10	Femelle	2	Tetrapoda	Aves	Aves_ord_fam_gen_sp	Aves_ord_fam_gen_sp	Aves_ord_fam_gen_sp	Aves_ord_fam_gen_sp	Aves_ord_fam_gen_sp	other_birds	10.5404	827	26
329	15420	15455	allien_fanny_leprovost	50140	2016	5	Femelle	3	Tetrapoda	Aves	Aves_ord_fam_gen_sp	Aves_ord_fam_gen_sp	Aves_ord_fam_gen_sp	Aves_ord_fam_gen_sp	Aves_ord_fam_gen_sp	other_birds	10.5404	827	26
330	16909	16944	allien_fanny_leprovost	50140	2016	6	Femelle	3	Tetrapoda	Aves	Aves_ord_fam_gen_sp	Aves_ord_fam_gen_sp	Aves_ord_fam_gen_sp	Aves_ord_fam_gen_sp	Aves_ord_fam_gen_sp	other_birds	10.5404	827	26
331	16323	16358	allien_fanny_leprovost	50140	2016	5	Femelle	3	Tetrapoda	Aves	Passeriformes	Passeri_fam_gen_sp	Passeri_fam_gen_sp	Passeri_fam_gen_sp	Passeri_fam_gen_sp	passeriforms	10.5404	827	26
332	21419	21454	allien_fanny_leprovost	50140	2016	8	Femelle	3	Tetrapoda	Aves	Passeriformes	Passeri_fam_gen_sp	Passeri_fam_gen_sp	Passeri_fam_gen_sp	Passeri_fam_gen_sp	passeriforms	10.5404	827	26
333	10666	10701	allien_fanny_leprovost	50140	2016	2	Femelle	3	Tetrapoda	Aves	Passeriformes	Passeri	Fringillidae	fringilla	Fringilla_coelebs	passeriforms	10.5404	827	26
334	3456	3478	allien_fanny_leprovost	50140	2015	9	Femelle	2	Tetrapoda	Aves	Passeriformes	Passeri	Phylloscopidae	phylloscopus	Phylloscopus_collybita	passeriforms	10.5404	827	26
335	7825	7852	allien_fanny_leprovost	50140	2015	11	Femelle	2	Tetrapoda	Aves	Passeriformes	Passeri	Muscicapidae	erithacus	Erithacus_rubecula	passeriforms	10.5404	827	26
336	38517	Leprovost_22_07_20_08_08_20	allien_fanny_leprovost	50140	2020	7	Femelle	7	Tetrapoda	Aves	Passeriformes	Passeri	Muscicapidae	erithacus	Erithacus_rubecula	passeriforms	10.5404	827	26
337	1569	1591	allien_fanny_leprovost	50140	2015	8	Femelle	2	Arthropoda	Hexapoda	Odonata	Odonata_fan_gen_sp	Odonata_fan_gen_sp	Odonata_fan_gen_sp	Odonata_fan_gen_sp	hexapods	10.5404	827	26
338	23406	23441	allien_fanny_leprovost	50140	2016	10	Femelle	3	Tetrapoda	Mammalia	Rodentia	Myomorpha	Cricetidae	Cricetidae_gen_sp	Cricetidae_gen_sp	cricetids	10.5404	827	26
339	23666	23701	allien_fanny_leprovost	50140	2016	10	Femelle	3	Tetrapoda	Mammalia	Rodentia	Myomorpha	Cricetidae	Cricetidae_gen_sp	Cricetidae_gen_sp	cricetids	10.5404	827	26
340	25815	25850	allien_fanny_leprovost	50140	2017	2	Femelle	4	Tetrapoda	Mammalia	Rodentia	Myomorpha	Cricetidae	Cricetidae_gen_sp	Cricetidae_gen_sp	cricetids	10.5404	827	26
341	25896	25931	allien_fanny_leprovost	50140	2017	2	Femelle	4	Tetrapoda	Mammalia	Rodentia	Myomorpha	Cricetidae	Cricetidae_gen_sp	Cricetidae_gen_sp	cricetids	10.5404	827	26
342	26840	26875	allien_fanny_leprovost	50140	2017	4	Femelle	4	Tetrapoda	Mammalia	Rodentia	Myomorpha	Cricetidae	Cricetidae_gen_sp	Cricetidae_gen_sp	cricetids	10.5404	827	26
343	29498	29533	allien_fanny_leprovost	50140	2017	8	Femelle	4	Tetrapoda	Mammalia	Rodentia	Myomorpha	Cricetidae	Cricetidae_gen_sp	Cricetidae_gen_sp	cricetids	10.5404	827	26
344	31850	31885	allien_fanny_leprovost	50140	2018	4	Femelle	5	Tetrapoda	Mammalia	Rodentia	Myomorpha	Cricetidae	Cricetidae_gen_sp	Cricetidae_gen_sp	cricetids	10.5404	827	26
345	36087	36122	allien_fanny_leprovost	50140	2019	3	Femelle	6	Tetrapoda	Mammalia	Rodentia	Myomorpha	Cricetidae	arvicola	Arvicola_amphibius	cricetids	10.5404	827	26
346	38485	Leprovost_18_08_20_20_08_20	allien_fanny_leprovost	50140	2020	8	Femelle	7	Tetrapoda	Mammalia	Lagomorpha	Leporidae	Leporidae	oryctolagus	Oryctolagus_cuniculus	other_mammals	10.5404	827	26
347	29684	29719	allien_fanny_leprovost	50140	2017	8	Femelle	4	Tetrapoda	Mammalia	Lagomorpha	Leporidae	Leporidae	oryctolagus	Oryctolagus_cuniculus	other_mammals	10.5404	827	26
348	38379	Leprovost_02_09_20_03_09_20	allien_fanny_leprovost	50140	2020	9	Femelle	7	Tetrapoda	Mammalia	Rodentia	Myomorpha	Muridae	apodemus	Apodemus_sp	muroids	10.5404	827	26
349	38378	Leprovost_02_09_20_03_09_20	allien_fanny_leprovost	50140	2020	9	Femelle	7	Tetrapoda	Mammalia	Rodentia	Myomorpha	Muridae	apodemus	Apodemus_sp	muroids	10.5404	827	26
350	38373	Leprovost_04_09_20_04_09_20	allien_fanny_leprovost	50140	2020	9	Femelle	7	Tetrapoda	Mammalia	Rodentia	Myomorpha	Muridae	apodemus	Apodemus_sp	muroids	10.5404	827	26
351	38060	Leprovost_08_05_20_10_05_20	allien_fanny_leprovost	50140	2020	5	Femelle	7	Tetrapoda	Mammalia	Rodentia	Myomorpha	Muridae	apodemus	Apodemus_sp	muroids	10.5404	827	26
352	8030	8057	allien_fanny_leprovost	50140	2015	11	Femelle	2	Tetrapoda	Mammalia	Rodentia	Myomorpha	Muridae	apodemus	Apodemus_sp	muroids	10.5404	827	26
353	14372	14407	allien_fanny_leprovost	50140	2016	5	Femelle	3	Tetrapoda	Mammalia	Rodentia	Myomorpha	Muridae	apodemus	Apodemus_sp	muroids	10.5404	827	26
354	15663	15698	allien_fanny_leprovost	50140	2016	5	Femelle	3	Tetrapoda	Mammalia	Rodentia	Myomorpha	Muridae	apodemus	Apodemus_sp	muroids	10.5404	827	26
355	23338	23373	allien_fanny_leprovost	50140	2016	10	Femelle	3	Tetrapoda	Mammalia	Rodentia	Myomorpha	Muridae	apodemus	Apodemus_sp	muroids	10.5404	827	26
356	24153	24188	allien_fanny_leprovost	50140	2016	11	Femelle	3	Tetrapoda	Mammalia	Rodentia	Myomorpha	Muridae	apodemus	Apodemus_sp	muroids	10.5404	827	26
357	24585	24620	allien_fanny_leprovost	50140	2016	12	Femelle	3	Tetrapoda	Mammalia	Rodentia	Myomorpha	Muridae	apodemus	Apodemus_sp	muroids	10.5404	827	26
358	24586	24621	allien_fanny_leprovost	50140	2016	12	Femelle	3	Tetrapoda	Mammalia	Rodentia	Myomorpha	Muridae	apodemus	Apodemus_sp	muroids	10.5404	827	26
359	24767	24802	allien_fanny_leprovost	50140	2016	12	Femelle	3	Tetrapoda	Mammalia	Rodentia	Myomorpha	Muridae	apodemus	Apodemus_sp	muroids	10.5404	827	26
360	26616	26651	allien_fanny_leprovost	50140	2017	4	Femelle	4	Tetrapoda	Mammalia	Rodentia	Myomorpha	Muridae	apodemus	Apodemus_sp	muroids	10.5404	827	26
361	27572	27607	allien_fanny_leprovost	50140	2017	5	Femelle	4	Tetrapoda	Mammalia	Rodentia	Myomorpha	Muridae	apodemus	Apodemus_sp	muroids	10.5404	827	26
362	28441	28476	allien_fanny_leprovost	50140	2017	6	Femelle	4	Tetrapoda	Mammalia	Rodentia	Myomorpha	Muridae	apodemus	Apodemus_sp	muroids	10.5404	827	26
363	28981	29016	allien_fanny_leprovost	50140	2017	7	Femelle	4	Tetrapoda	Mammalia	Rodentia	Myomorpha	Muridae	apodemus	Apodemus_sp	muroids	10.5404	827	26
364	29458	29493	allien_fanny_leprovost	50140	2017	8	Femelle	4	Tetrapoda	Mammalia	Rodentia	Myomorpha	Muridae	apodemus	Apodemus_sp	muroids	10.5404	827	26
365	29802	29837	allien_fanny_leprovost	50140	2017	9	Femelle	4	Tetrapoda	Mammalia	Rodentia	Myomorpha	Muridae	apodemus	Apodemus_sp	muroids	10.5404	827	26
366	29851	29886	allien_fanny_leprovost	50140	2017	9	Femelle	4	Tetrapoda	Mammalia	Rodentia	Myomorpha	Muridae	apodemus	Apodemus_sp	muroids	10.5404	827	26
367	29852	29887	allien_fanny_leprovost	50140	2017	9	Femelle	4	Tetrapoda	Mammalia	Rodentia	Myomorpha	Muridae	apodemus	Apodemus_sp	muroids	10.5404	827	26
368	30825	30860	allien_fanny_leprovost	50140	2017	10	Femelle	4	Tetrapoda	Mammalia	Rodentia	Myomorpha	Muridae	apodemus	Apodemus_sp	muroids	10.5404	827	26
369	1570	1592	allien_fanny_leprovost	50140	2015	8	Femelle	2	Tetrapoda	Mammalia	Eulipotyphla	Soricidae	Soricidae	Soricidae_gen_sp	Soricidae_gen_sp	soricids	10.5404	827	26
370	4705	4727	allien_fanny_leprovost	50140	2015	9	Femelle	2	Tetrapoda	Mammalia	Eulipotyphla	Soricidae	Soricidae	Soricidae_gen_sp	Soricidae_gen_sp	soricids	10.5404	827	26
371	7718	7745	allien_fanny_leprovost	50140	2015	11	Femelle	2	Tetrapoda	Mammalia	Eulipotyphla	Soricidae	Soricidae	Soricidae_gen_sp	Soricidae_gen_sp	soricids	10.5404	827	26
372	8323	8350	allien_fanny_leprovost	50140	2015	11	Femelle	2	Tetrapoda	Mammalia	Eulipotyphla	Soricidae	Soricidae	Soricidae_gen_sp	Soricidae_gen_sp	soricids	10.5404	827	26
373	15150	15185	allien_fanny_leprovost	50140	2016	5	Femelle	3	Tetrapoda	Mammalia	Eulipotyphla	Soricidae	Soricidae	Soricidae_gen_sp	Soricidae_gen_sp	soricids	10.5404	827	26
374	15357	15392	allien_fanny_leprovost	50140	2016	5	Femelle	3	Tetrapoda	Mammalia	Eulipotyphla	Soricidae	Soricidae	Soricidae_gen_sp	Soricidae_gen_sp	soricids	10.5404	827	26
375	16322	16357	allien_fanny_leprovost	50140	2016	5	Femelle	3	Tetrapoda	Mammalia	Eulipotyphla	Soricidae	Soricidae	Soricidae_gen_sp	Soricidae_gen_sp	soricids	10.5404	827	26
376	16400	16435	allien_fanny_leprovost	50140	2016	5	Femelle	3	Tetrapoda	Mammalia	Eulipotyphla	Soricidae	Soricidae	Soricidae_gen_sp	Soricidae_gen_sp	soricids	10.5404	827	26
377	16596	16631	allien_fanny_leprovost	50140	2016	5	Femelle	3	Tetrapoda	Mammalia	Eulipotyphla	Soricidae	Soricidae	Soricidae_gen_sp	Soricidae_gen_sp	soricids	10.5404	827	26
378	17656	17691	allien_fanny_leprovost	50140	2016	6	Femelle	3	Tetrapoda	Mammalia	Eulipotyphla	Soricidae	Soricidae	Soricidae_gen_sp	Soricidae_gen_sp	soricids	10.5404	827	26
379	17657	17692	allien_fanny_leprovost	50140	2016	6	Femelle	3	Tetrapoda	Mammalia	Eulipotyphla	Soricidae	Soricidae	Soricidae_gen_sp	Soricidae_gen_sp	soricids	10.5404	827	26
380	18944	18979	allien_fanny_leprovost	50140	2016	7	Femelle	3	Tetrapoda	Mammalia	Eulipotyphla	Soricidae	Soricidae	Soricidae_gen_sp	Soricidae_gen_sp	soricids	10.5404	827	26
381	19657	19692	allien_fanny_leprovost	50140	2016	7	Femelle	3	Tetrapoda	Mammalia	Eulipotyphla	Soricidae	Soricidae	Soricidae_gen_sp	Soricidae_gen_sp	soricids	10.5404	827	26
382	20855	20890	allien_fanny_leprovost	50140	2016	8	Femelle	3	Tetrapoda	Mammalia	Eulipotyphla	Soricidae	Soricidae	Soricidae_gen_sp	Soricidae_gen_sp	soricids	10.5404	827	26
383	20889	20924	allien_fanny_leprovost	50140	2016	8	Femelle	3	Tetrapoda	Mammalia	Eulipotyphla	Soricidae	Soricidae	Soricidae_gen_sp	Soricidae_gen_sp	soricids	10.5404	827	26
384	21028	21063	allien_fanny_leprovost	50140	2016	8	Femelle	3	Tetrapoda	Mammalia	Eulipotyphla	Soricidae	Soricidae	Soricidae_gen_sp	Soricidae_gen_sp	soricids	10.5404	827	26
385	21129	21164	allien_fanny_leprovost	50140	2016	8	Femelle	3	Tetrapoda	Mammalia	Eulipotyphla	Soricidae	Soricidae	Soricidae_gen_sp	Soricidae_gen_sp	soricids	10.5404	827	26
386	21446	21481	allien_fanny_leprovost	50140	2016	8	Femelle	3	Tetrapoda	Mammalia	Eulipotyphla	Soricidae	Soricidae	Soricidae_gen_sp	Soricidae_gen_sp	soricids	10.5404	827	26
387	21841	21876	allien_fanny_leprovost	50140	2016	8	Femelle	3	Tetrapoda	Mammalia	Eulipotyphla	Soricidae	Soricidae	Soricidae_gen_sp	Soricidae_gen_sp	soricids	10.5404	827	26
388	22026	22061	allien_fanny_leprovost	50140	2016	8	Femelle	3	Tetrapoda	Mammalia	Eulipotyphla	Soricidae	Soricidae	Soricidae_gen_sp	Soricidae_gen_sp	soricids	10.5404	827	26
389	22095	22130	allien_fanny_leprovost	50140	2016	8	Femelle	3	Tetrapoda	Mammalia	Eulipotyphla	Soricidae	Soricidae	Soricidae_gen_sp	Soricidae_gen_sp	soricids	10.5404	827	26
390	22136	22171	allien_fanny_leprovost	50140	2016	8	Femelle	3	Tetrapoda	Mammalia	Eulipotyphla	Soricidae	Soricidae	Soricidae_gen_sp	Soricidae_gen_sp	soricids	10.5404	827	26
391	22319	22354	allien_fanny_leprovost	50140	2016	9	Femelle	3	Tetrapoda	Mammalia	Eulipotyphla	Soricidae	Soricidae	Soricidae_gen_sp	Soricidae_gen_sp	soricids	10.5404	827	26
392	22320	22355	allien_fanny_leprovost	50140	2016	9	Femelle	3	Tetrapoda	Mammalia	Eulipotyphla	Soricidae	Soricidae	Soricidae_gen_sp	Soricidae_gen_sp	soricids	10.5404	827	26
393	22389	22424	allien_fanny_leprovost	50140	2016	9	Femelle	3	Tetrapoda	Mammalia	Eulipotyphla	Soricidae	Soricidae	Soricidae_gen_sp	Soricidae_gen_sp	soricids	10.5404	827	26
394	23173	23208	allien_fanny_leprovost	50140	2016	9	Femelle	3	Tetrapoda	Mammalia	Eulipotyphla	Soricidae	Soricidae	Soricidae_gen_sp	Soricidae_gen_sp	soricids	10.5404	827	26
395	23202	23237	allien_fanny_leprovost	50140	2016	9	Femelle	3	Tetrapoda	Mammalia	Eulipotyphla	Soricidae	Soricidae	Soricidae_gen_sp	Soricidae_gen_sp	soricids	10.5404	827	26
396	24312	24347	allien_fanny_leprovost	50140	2016	11	Femelle	3	Tetrapoda	Mammalia	Eulipotyphla	Soricidae	Soricidae	Soricidae_gen_sp	Soricidae_gen_sp	soricids	10.5404	827	26
397	26614	26649	allien_fanny_leprovost	50140	2017	4	Femelle	4	Tetrapoda	Mammalia	Eulipotyphla	Soricidae	Soricidae	Soricidae_gen_sp	Soricidae_gen_sp	soricids	10.5404	827	26
398	26763	26798	allien_fanny_leprovost	50140	2017	4	Femelle	4	Tetrapoda	Mammalia	Eulipotyphla	Soricidae	Soricidae	Soricidae_gen_sp	Soricidae_gen_sp	soricids	10.5404	827	26
399	30287	30322	allien_fanny_leprovost	50140	2017	10	Femelle	4	Tetrapoda	Mammalia	Eulipotyphla	Soricidae	Soricidae	Soricidae_gen_sp	Soricidae_gen_sp	soricids	10.5404	827	26
400	38062	Leprovost_26_04_20_26_04_20	allien_fanny_leprovost	50140	2020	4	Femelle	7	Tetrapoda	Mammalia	Rodentia	Myomorpha	Cricetidae	Cricetidae_gen_sp	Cricetidae_gen_sp	cricetids	10.5404	827	26
401	38061	Leprovost_10_05_20_10_05_20	allien_fanny_leprovost	50140	2020	5	Femelle	7	Tetrapoda	Mammalia	Rodentia	Myomorpha	Cricetidae	Cricetidae_gen_sp	Cricetidae_gen_sp	cricetids	10.5404	827	26
402	5082	5104	allien_fanny_leprovost	50140	2015	10	Femelle	2	Tetrapoda	Mammalia	Rodentia	Myomorpha	Cricetidae	Cricetidae_gen_sp	Cricetidae_gen_sp	cricetids	10.5404	827	26
403	6372	6394	allien_fanny_leprovost	50140	2015	10	Femelle	2	Tetrapoda	Mammalia	Rodentia	Myomorpha	Cricetidae	Cricetidae_gen_sp	Cricetidae_gen_sp	cricetids	10.5404	827	26
404	6373	6395	allien_fanny_leprovost	50140	2015	10	Femelle	2	Tetrapoda	Mammalia	Rodentia	Myomorpha	Cricetidae	Cricetidae_gen_sp	Cricetidae_gen_sp	cricetids	10.5404	827	26
405	10052	10079	allien_fanny_leprovost	50140	2016	1	Femelle	3	Tetrapoda	Mammalia	Rodentia	Myomorpha	Cricetidae	Cricetidae_gen_sp	Cricetidae_gen_sp	cricetids	10.5404	827	26
406	22321	22356	allien_fanny_leprovost	50140	2016	9	Femelle	3	Tetrapoda	Mammalia	Rodentia	Myomorpha	Cricetidae	Cricetidae_gen_sp	Cricetidae_gen_sp	cricetids	10.5404	827	26
407	22685	22720	allien_fanny_leprovost	50140	2016	9	Femelle	3	Tetrapoda	Mammalia	Rodentia	Myomorpha	Cricetidae	Cricetidae_gen_sp	Cricetidae_gen_sp	cricetids	10.5404	827	26
408	26208	26243	allien_fanny_leprovost	50140	2017	3	Femelle	4	Tetrapoda	Mammalia	Rodentia	Myomorpha	Cricetidae	Cricetidae_gen_sp	Cricetidae_gen_sp	cricetids	10.5404	827	26
409	26764	26799	allien_fanny_leprovost	50140	2017	4	Femelle	4	Tetrapoda	Mammalia	Rodentia	Myomorpha	Cricetidae	Cricetidae_gen_sp	Cricetidae_gen_sp	cricetids	10.5404	827	26
410	27043	27078	allien_fanny_leprovost	50140	2017	4	Femelle	4	Tetrapoda	Mammalia	Rodentia	Myomorpha	Cricetidae	Cricetidae_gen_sp	Cricetidae_gen_sp	cricetids	10.5404	827	26
411	27534	27569	allien_fanny_leprovost	50140	2017	5	Femelle	4	Tetrapoda	Mammalia	Rodentia	Myomorpha	Cricetidae	Cricetidae_gen_sp	Cricetidae_gen_sp	cricetids	10.5404	827	26
412	27879	27914	allien_fanny_leprovost	50140	2017	6	Femelle	4	Tetrapoda	Mammalia	Rodentia	Myomorpha	Cricetidae	Cricetidae_gen_sp	Cricetidae_gen_sp	cricetids	10.5404	827	26
413	28307	28342	allien_fanny_leprovost	50140	2017	6	Femelle	4	Tetrapoda	Mammalia	Rodentia	Myomorpha	Cricetidae	Cricetidae_gen_sp	Cricetidae_gen_sp	cricetids	10.5404	827	26
414	28761	28796	allien_fanny_leprovost	50140	2017	7	Femelle	4	Tetrapoda	Mammalia	Rodentia	Myomorpha	Cricetidae	Cricetidae_gen_sp	Cricetidae_gen_sp	cricetids	10.5404	827	26
415	29290	29325	allien_fanny_leprovost	50140	2017	8	Femelle	4	Tetrapoda	Mammalia	Rodentia	Myomorpha	Cricetidae	Cricetidae_gen_sp	Cricetidae_gen_sp	cricetids	10.5404	827	26
416	30538	30573	allien_fanny_leprovost	50140	2017	10	Femelle	4	Tetrapoda	Mammalia	Rodentia	Myomorpha	Cricetidae	Cricetidae_gen_sp	Cricetidae_gen_sp	cricetids	10.5404	827	26
417	38613	Leprovost_28_06_20_28_06_20	allien_fanny_leprovost	50140	2020	6	Femelle	7	Tetrapoda	Mammalia	Rodentia	Myomorpha	Muroidea_fam_gen_sp	Muroidea_fam_gen_sp	Muroidea_fam_gen_sp	muroids	10.5404	827	26
418	7229	7256	allien_fanny_leprovost	50140	2015	10	Femelle	2	Tetrapoda	Mammalia	Rodentia	Myomorpha	Muroidea_fam_gen_sp	Muroidea_fam_gen_sp	Muroidea_fam_gen_sp	muroids	10.5404	827	26
419	11198	11233	allien_fanny_leprovost	50140	2016	3	Femelle	3	Tetrapoda	Mammalia	Rodentia	Myomorpha	Muroidea_fam_gen_sp	Muroidea_fam_gen_sp	Muroidea_fam_gen_sp	muroids	10.5404	827	26
420	15356	15391	allien_fanny_leprovost	50140	2016	5	Femelle	3	Tetrapoda	Mammalia	Rodentia	Myomorpha	Muroidea_fam_gen_sp	Muroidea_fam_gen_sp	Muroidea_fam_gen_sp	muroids	10.5404	827	26
421	20854	20889	allien_fanny_leprovost	50140	2016	8	Femelle	3	Tetrapoda	Mammalia	Rodentia	Myomorpha	Muroidea_fam_gen_sp	Muroidea_fam_gen_sp	Muroidea_fam_gen_sp	muroids	10.5404	827	26
422	21903	21938	allien_fanny_leprovost	50140	2016	8	Femelle	3	Tetrapoda	Mammalia	Rodentia	Myomorpha	Muroidea_fam_gen_sp	Muroidea_fam_gen_sp	Muroidea_fam_gen_sp	muroids	10.5404	827	26
423	22318	22353	allien_fanny_leprovost	50140	2016	9	Femelle	3	Tetrapoda	Mammalia	Rodentia	Myomorpha	Muroidea_fam_gen_sp	Muroidea_fam_gen_sp	Muroidea_fam_gen_sp	muroids	10.5404	827	26
424	22999	23034	allien_fanny_leprovost	50140	2016	9	Femelle	3	Tetrapoda	Mammalia	Rodentia	Myomorpha	Muroidea_fam_gen_sp	Muroidea_fam_gen_sp	Muroidea_fam_gen_sp	muroids	10.5404	827	26
425	23162	23197	allien_fanny_leprovost	50140	2016	9	Femelle	3	Tetrapoda	Mammalia	Rodentia	Myomorpha	Muroidea_fam_gen_sp	Muroidea_fam_gen_sp	Muroidea_fam_gen_sp	muroids	10.5404	827	26
426	23926	23961	allien_fanny_leprovost	50140	2016	10	Femelle	3	Tetrapoda	Mammalia	Rodentia	Myomorpha	Muroidea_fam_gen_sp	Muroidea_fam_gen_sp	Muroidea_fam_gen_sp	muroids	10.5404	827	26
427	24311	24346	allien_fanny_leprovost	50140	2016	11	Femelle	3	Tetrapoda	Mammalia	Rodentia	Myomorpha	Muroidea_fam_gen_sp	Muroidea_fam_gen_sp	Muroidea_fam_gen_sp	muroids	10.5404	827	26
428	24485	24520	allien_fanny_leprovost	50140	2016	12	Femelle	3	Tetrapoda	Mammalia	Rodentia	Myomorpha	Muroidea_fam_gen_sp	Muroidea_fam_gen_sp	Muroidea_fam_gen_sp	muroids	10.5404	827	26
429	26906	26941	allien_fanny_leprovost	50140	2017	4	Femelle	4	Tetrapoda	Mammalia	Rodentia	Myomorpha	Muroidea_fam_gen_sp	Muroidea_fam_gen_sp	Muroidea_fam_gen_sp	muroids	10.5404	827	26
430	27012	27047	allien_fanny_leprovost	50140	2017	4	Femelle	4	Tetrapoda	Mammalia	Rodentia	Myomorpha	Muroidea_fam_gen_sp	Muroidea_fam_gen_sp	Muroidea_fam_gen_sp	muroids	10.5404	827	26
431	28366	28401	allien_fanny_leprovost	50140	2017	6	Femelle	4	Tetrapoda	Mammalia	Rodentia	Myomorpha	Muroidea_fam_gen_sp	Muroidea_fam_gen_sp	Muroidea_fam_gen_sp	muroids	10.5404	827	26
432	28980	29015	allien_fanny_leprovost	50140	2017	7	Femelle	4	Tetrapoda	Mammalia	Rodentia	Myomorpha	Muroidea_fam_gen_sp	Muroidea_fam_gen_sp	Muroidea_fam_gen_sp	muroids	10.5404	827	26
433	29378	29413	allien_fanny_leprovost	50140	2017	8	Femelle	4	Tetrapoda	Mammalia	Rodentia	Myomorpha	Muroidea_fam_gen_sp	Muroidea_fam_gen_sp	Muroidea_fam_gen_sp	muroids	10.5404	827	26
434	29550	29585	allien_fanny_leprovost	50140	2017	8	Femelle	4	Tetrapoda	Mammalia	Rodentia	Myomorpha	Muroidea_fam_gen_sp	Muroidea_fam_gen_sp	Muroidea_fam_gen_sp	muroids	10.5404	827	26
435	29771	29806	allien_fanny_leprovost	50140	2017	9	Femelle	4	Tetrapoda	Mammalia	Rodentia	Myomorpha	Muroidea_fam_gen_sp	Muroidea_fam_gen_sp	Muroidea_fam_gen_sp	muroids	10.5404	827	26
436	29889	29924	allien_fanny_leprovost	50140	2017	9	Femelle	4	Tetrapoda	Mammalia	Rodentia	Myomorpha	Muroidea_fam_gen_sp	Muroidea_fam_gen_sp	Muroidea_fam_gen_sp	muroids	10.5404	827	26
437	30170	30205	allien_fanny_leprovost	50140	2017	9	Femelle	4	Tetrapoda	Mammalia	Rodentia	Myomorpha	Muroidea_fam_gen_sp	Muroidea_fam_gen_sp	Muroidea_fam_gen_sp	muroids	10.5404	827	26
438	30172	30207	allien_fanny_leprovost	50140	2017	9	Femelle	4	Tetrapoda	Mammalia	Rodentia	Myomorpha	Muroidea_fam_gen_sp	Muroidea_fam_gen_sp	Muroidea_fam_gen_sp	muroids	10.5404	827	26
439	30826	30861	allien_fanny_leprovost	50140	2017	11	Femelle	4	Tetrapoda	Mammalia	Rodentia	Myomorpha	Muroidea_fam_gen_sp	Muroidea_fam_gen_sp	Muroidea_fam_gen_sp	muroids	10.5404	827	26
440	36237	36272	allien_fanny_leprovost	50140	2019	7	Femelle	6	Tetrapoda	Mammalia	Rodentia	Myomorpha	Muridae	rattus	Rattus_norvegicus	muroids	10.5404	827	26
441	38616	Leprovost_28_06_20_28_06_20	allien_fanny_leprovost	50140	2020	6	Femelle	7	Tetrapoda	Mammalia	Rodentia	Myomorpha	Muridae	rattus	Rattus_norvegicus	muroids	10.5404	827	26
442	38059	Leprovost_04_05_20_10_05_20	allien_fanny_leprovost	50140	2020	5	Femelle	7	Tetrapoda	Mammalia	Rodentia	Myomorpha	Muridae	mus	Mus_musculus	muroids	10.5404	827	26
443	14287	14322	allien_fanny_leprovost	50140	2016	5	Femelle	3	Tetrapoda	Mammalia	Rodentia	Myomorpha	Muridae	mus	Mus_musculus	muroids	10.5404	827	26
444	29724	29759	allien_fanny_leprovost	50140	2017	8	Femelle	4	Tetrapoda	Mammalia	Rodentia	Myomorpha	Muridae	mus	Mus_musculus	muroids	10.5404	827	26
445	30171	30206	allien_fanny_leprovost	50140	2017	9	Femelle	4	Tetrapoda	Mammalia	Rodentia	Myomorpha	Muridae	mus	Mus_musculus	muroids	10.5404	827	26
446	30173	30208	allien_fanny_leprovost	50140	2017	9	Femelle	4	Tetrapoda	Mammalia	Rodentia	Myomorpha	Muridae	mus	Mus_musculus	muroids	10.5404	827	26
447	1571	1593	allien_fanny_leprovost	50140	2015	6	Femelle	2	Tetrapoda	Mammalia	Eulipotyphla	Talpidae	Talpidae	talpa	Talpa_sp	other_mammals	10.5404	827	26
448	3715	3737	allien_fanny_leprovost	50140	2015	9	Femelle	2	Tetrapoda	Mammalia	Eulipotyphla	Talpidae	Talpidae	talpa	Talpa_sp	other_mammals	10.5404	827	26
449	19038	19073	allien_fanny_leprovost	50140	2016	7	Femelle	3	Tetrapoda	Mammalia	Eulipotyphla	Talpidae	Talpidae	talpa	Talpa_sp	other_mammals	10.5404	827	26
450	15421	15456	allien_fanny_leprovost	50140	2016	5	Femelle	3	Tetrapoda	Squamata	Squamata	Lacertilia	Lacertilia_fam_gen_sp	Lacertilia_fam_gen_sp	Lacertilia_fam_gen_sp	lacertilia	10.5404	827	26
451	3290	3312	aloa_agathe_martine	77150	2015	6	Male	12	Tetrapoda	Squamata	Squamata	Lacertilia	Lacertidae	podarcis	Podarcis_muralis	lacertilia	10.6906	644	65
452	3292	3314	aloa_agathe_martine	77150	2015	6	Male	12	Tetrapoda	Squamata	Squamata	Lacertilia	Lacertidae	podarcis	Podarcis_muralis	lacertilia	10.6906	644	65
453	30866	30901	aloe_bernard_esteban	82710	2017	11	Femelle	1	Tetrapoda	Mammalia	Eulipotyphla	Soricidae	Soricidae	sorex	Sorex_araneus	soricids	12.8173	735	79
454	30587	30622	alouette_aline_caillaud-pauchet	79210	2017	10	Femelle	2	Tetrapoda	Aves	Passeriformes	Passeri	Sturnidae	sturnus	Sturnus_vulgaris	passeriforms	12.4412	784	59
455	27978	28013	alouette_aline_caillaud-pauchet	79210	2017	6	Femelle	2	Tetrapoda	Mammalia	Eulipotyphla	Soricidae	Soricidae	Soricidae_gen_sp	Soricidae_gen_sp	soricids	12.4412	784	79
456	28477	28512	alouette_aline_caillaud-pauchet	79210	2017	6	Femelle	2	Tetrapoda	Mammalia	Eulipotyphla	Soricidae	Soricidae	sorex	Sorex_minutus	soricids	12.4412	784	59
457	23499	23534	alpha_clotilde_maillard	93130	2016	8	Male	4	Tetrapoda	Mammalia	Rodentia	Myomorpha	Muridae	mus	Mus_musculus	muroids	11.388	645	93
458	2413	2435	alphonse_laurence_aloin	37230	2015	8	Male	2	Tetrapoda	Aves	Passeriformes	Passeri	Hirundinidae	delichon	Delichon_urbicum	passeriforms	11.5257	671	78
459	6808	6835	alphonse_laurence_aloin	37230	2015	10	Male	2	Tetrapoda	Aves	Passeriformes	Passeri	Hirundinidae	delichon	Delichon_urbicum	passeriforms	11.5257	671	78
460	17266	17301	alphonse_laurence_aloin	37230	2016	5	Male	3	Tetrapoda	Aves	Aves_ord_fam_gen_sp	Aves_ord_fam_gen_sp	Aves_ord_fam_gen_sp	Aves_ord_fam_gen_sp	Aves_ord_fam_gen_sp	other_birds	11.5257	671	78
461	17269	17304	alphonse_laurence_aloin	37230	2016	6	Male	3	Tetrapoda	Aves	Aves_ord_fam_gen_sp	Aves_ord_fam_gen_sp	Aves_ord_fam_gen_sp	Aves_ord_fam_gen_sp	Aves_ord_fam_gen_sp	other_birds	11.5257	671	78
462	17270	17305	alphonse_laurence_aloin	37230	2016	6	Male	3	Tetrapoda	Aves	Aves_ord_fam_gen_sp	Aves_ord_fam_gen_sp	Aves_ord_fam_gen_sp	Aves_ord_fam_gen_sp	Aves_ord_fam_gen_sp	other_birds	11.5257	671	78
463	20314	20349	alphonse_laurence_aloin	37230	2016	6	Male	3	Tetrapoda	Aves	Aves_ord_fam_gen_sp	Aves_ord_fam_gen_sp	Aves_ord_fam_gen_sp	Aves_ord_fam_gen_sp	Aves_ord_fam_gen_sp	other_birds	11.5257	671	78
464	20315	20350	alphonse_laurence_aloin	37230	2016	7	Male	3	Tetrapoda	Aves	Aves_ord_fam_gen_sp	Aves_ord_fam_gen_sp	Aves_ord_fam_gen_sp	Aves_ord_fam_gen_sp	Aves_ord_fam_gen_sp	other_birds	11.5257	671	78
465	20316	20351	alphonse_laurence_aloin	37230	2016	7	Male	3	Tetrapoda	Aves	Aves_ord_fam_gen_sp	Aves_ord_fam_gen_sp	Aves_ord_fam_gen_sp	Aves_ord_fam_gen_sp	Aves_ord_fam_gen_sp	other_birds	11.5257	671	78
466	20319	20354	alphonse_laurence_aloin	37230	2016	7	Male	3	Tetrapoda	Aves	Aves_ord_fam_gen_sp	Aves_ord_fam_gen_sp	Aves_ord_fam_gen_sp	Aves_ord_fam_gen_sp	Aves_ord_fam_gen_sp	other_birds	11.5257	671	78
467	22249	22284	alphonse_laurence_aloin	37230	2016	8	Male	3	Tetrapoda	Aves	Aves_ord_fam_gen_sp	Aves_ord_fam_gen_sp	Aves_ord_fam_gen_sp	Aves_ord_fam_gen_sp	Aves_ord_fam_gen_sp	other_birds	11.5257	671	78
468	27832	27867	alphonse_laurence_aloin	37230	2017	5	Male	4	Tetrapoda	Aves	Aves_ord_fam_gen_sp	Aves_ord_fam_gen_sp	Aves_ord_fam_gen_sp	Aves_ord_fam_gen_sp	Aves_ord_fam_gen_sp	other_birds	11.5257	671	78
469	27836	27871	alphonse_laurence_aloin	37230	2017	5	Male	4	Tetrapoda	Aves	Aves_ord_fam_gen_sp	Aves_ord_fam_gen_sp	Aves_ord_fam_gen_sp	Aves_ord_fam_gen_sp	Aves_ord_fam_gen_sp	other_birds	11.5257	671	78
470	27838	27873	alphonse_laurence_aloin	37230	2017	5	Male	4	Tetrapoda	Aves	Aves_ord_fam_gen_sp	Aves_ord_fam_gen_sp	Aves_ord_fam_gen_sp	Aves_ord_fam_gen_sp	Aves_ord_fam_gen_sp	other_birds	11.5257	671	78
471	27839	27874	alphonse_laurence_aloin	37230	2017	6	Male	4	Tetrapoda	Aves	Aves_ord_fam_gen_sp	Aves_ord_fam_gen_sp	Aves_ord_fam_gen_sp	Aves_ord_fam_gen_sp	Aves_ord_fam_gen_sp	other_birds	11.5257	671	78
472	28572	28607	alphonse_laurence_aloin	37230	2017	6	Male	4	Tetrapoda	Aves	Aves_ord_fam_gen_sp	Aves_ord_fam_gen_sp	Aves_ord_fam_gen_sp	Aves_ord_fam_gen_sp	Aves_ord_fam_gen_sp	other_birds	11.5257	671	78
473	28574	28609	alphonse_laurence_aloin	37230	2017	6	Male	4	Tetrapoda	Aves	Aves_ord_fam_gen_sp	Aves_ord_fam_gen_sp	Aves_ord_fam_gen_sp	Aves_ord_fam_gen_sp	Aves_ord_fam_gen_sp	other_birds	11.5257	671	78
474	28582	28617	alphonse_laurence_aloin	37230	2017	6	Male	4	Tetrapoda	Aves	Aves_ord_fam_gen_sp	Aves_ord_fam_gen_sp	Aves_ord_fam_gen_sp	Aves_ord_fam_gen_sp	Aves_ord_fam_gen_sp	other_birds	11.5257	671	78
475	25988	26023	alphonse_laurence_aloin	37230	2017	2	Male	4	Tetrapoda	Mammalia	Chiroptera	Chiroptera_fam_gen_sp	Chiroptera_fam_gen_sp	Chiroptera_fam_gen_sp	Chiroptera_fam_gen_sp	other_mammals	11.5257	671	78
476	29977	30012	alphonse_laurence_aloin	37230	2017	7	Male	4	Tetrapoda	Mammalia	Chiroptera	Chiroptera_fam_gen_sp	Chiroptera_fam_gen_sp	Chiroptera_fam_gen_sp	Chiroptera_fam_gen_sp	other_mammals	11.5257	671	78
477	2412	2434	alphonse_laurence_aloin	37230	2015	8	Male	2	Tetrapoda	Mammalia	Rodentia	Myomorpha	Cricetidae	arvicola	Arvicola_sp	cricetids	11.5257	671	78
478	11092	11127	alphonse_laurence_aloin	37230	2016	2	Male	3	Tetrapoda	Mammalia	Rodentia	Myomorpha	Cricetidae	arvicola	Arvicola_sp	cricetids	11.5257	671	78
479	3070	3092	alphonse_laurence_aloin	37230	2015	9	Male	2	Tetrapoda	Mammalia	Rodentia	Myomorpha	Muroidea_fam_gen_sp	Muroidea_fam_gen_sp	Muroidea_fam_gen_sp	muroids	11.5257	671	78
480	6806	6833	alphonse_laurence_aloin	37230	2015	10	Male	2	Tetrapoda	Mammalia	Rodentia	Myomorpha	Muroidea_fam_gen_sp	Muroidea_fam_gen_sp	Muroidea_fam_gen_sp	muroids	11.5257	671	78
481	5503	5525	alphonse_laurence_aloin	37230	2015	10	Male	2	Tetrapoda	Mammalia	Rodentia	Myomorpha	Muridae	apodemus	Apodemus_flavicollis	muroids	11.5257	671	78
482	24769	24804	alphonse_laurence_aloin	37230	2016	12	Male	3	Tetrapoda	Mammalia	Rodentia	Myomorpha	Muridae	apodemus	Apodemus_sp	muroids	11.5257	671	78
483	2410	2432	alphonse_laurence_aloin	37230	2015	8	Male	2	Tetrapoda	Mammalia	Rodentia	Myomorpha	Muridae	apodemus	Apodemus_sp	muroids	11.5257	671	78
484	2420	2442	alphonse_laurence_aloin	37230	2015	8	Male	2	Tetrapoda	Mammalia	Rodentia	Myomorpha	Muridae	apodemus	Apodemus_sp	muroids	11.5257	671	78
485	2687	2709	alphonse_laurence_aloin	37230	2015	9	Male	2	Tetrapoda	Mammalia	Rodentia	Myomorpha	Muridae	apodemus	Apodemus_sp	muroids	11.5257	671	78
486	2814	2836	alphonse_laurence_aloin	37230	2015	9	Male	2	Tetrapoda	Mammalia	Rodentia	Myomorpha	Muridae	apodemus	Apodemus_sp	muroids	11.5257	671	78
487	3069	3091	alphonse_laurence_aloin	37230	2015	9	Male	2	Tetrapoda	Mammalia	Rodentia	Myomorpha	Muridae	apodemus	Apodemus_sp	muroids	11.5257	671	78
488	3693	3715	alphonse_laurence_aloin	37230	2015	9	Male	2	Tetrapoda	Mammalia	Rodentia	Myomorpha	Muridae	apodemus	Apodemus_sp	muroids	11.5257	671	78
489	3694	3716	alphonse_laurence_aloin	37230	2015	9	Male	2	Tetrapoda	Mammalia	Rodentia	Myomorpha	Muridae	apodemus	Apodemus_sp	muroids	11.5257	671	78
490	4022	4044	alphonse_laurence_aloin	37230	2015	9	Male	2	Tetrapoda	Mammalia	Rodentia	Myomorpha	Muridae	apodemus	Apodemus_sp	muroids	11.5257	671	78
491	5502	5524	alphonse_laurence_aloin	37230	2015	9	Male	2	Tetrapoda	Mammalia	Rodentia	Myomorpha	Muridae	apodemus	Apodemus_sp	muroids	11.5257	671	78
492	5762	5784	alphonse_laurence_aloin	37230	2015	10	Male	2	Tetrapoda	Mammalia	Rodentia	Myomorpha	Muridae	apodemus	Apodemus_sp	muroids	11.5257	671	78
493	5764	5786	alphonse_laurence_aloin	37230	2015	10	Male	2	Tetrapoda	Mammalia	Rodentia	Myomorpha	Muridae	apodemus	Apodemus_sp	muroids	11.5257	671	78
494	6807	6834	alphonse_laurence_aloin	37230	2015	10	Male	2	Tetrapoda	Mammalia	Rodentia	Myomorpha	Muridae	apodemus	Apodemus_sp	muroids	11.5257	671	78
495	7269	7296	alphonse_laurence_aloin	37230	2015	10	Male	2	Tetrapoda	Mammalia	Rodentia	Myomorpha	Muridae	apodemus	Apodemus_sp	muroids	11.5257	671	78
496	7270	7297	alphonse_laurence_aloin	37230	2015	10	Male	2	Tetrapoda	Mammalia	Rodentia	Myomorpha	Muridae	apodemus	Apodemus_sp	muroids	11.5257	671	78
497	7898	7925	alphonse_laurence_aloin	37230	2015	11	Male	2	Tetrapoda	Mammalia	Rodentia	Myomorpha	Muridae	apodemus	Apodemus_sp	muroids	11.5257	671	78
498	9988	10015	alphonse_laurence_aloin	37230	2015	12	Male	2	Tetrapoda	Mammalia	Rodentia	Myomorpha	Muridae	apodemus	Apodemus_sp	muroids	11.5257	671	78
499	9991	10018	alphonse_laurence_aloin	37230	2016	1	Male	3	Tetrapoda	Mammalia	Rodentia	Myomorpha	Muridae	apodemus	Apodemus_sp	muroids	11.5257	671	78
500	10469	10504	alphonse_laurence_aloin	37230	2016	1	Male	3	Tetrapoda	Mammalia	Rodentia	Myomorpha	Muridae	apodemus	Apodemus_sp	muroids	11.5257	671	78
501	10470	10505	alphonse_laurence_aloin	37230	2016	2	Male	3	Tetrapoda	Mammalia	Rodentia	Myomorpha	Muridae	apodemus	Apodemus_sp	muroids	11.5257	671	78
502	11093	11128	alphonse_laurence_aloin	37230	2016	3	Male	3	Tetrapoda	Mammalia	Rodentia	Myomorpha	Muridae	apodemus	Apodemus_sp	muroids	11.5257	671	78
503	11437	11472	alphonse_laurence_aloin	37230	2016	3	Male	3	Tetrapoda	Mammalia	Rodentia	Myomorpha	Muridae	apodemus	Apodemus_sp	muroids	11.5257	671	78
504	11438	11473	alphonse_laurence_aloin	37230	2016	3	Male	3	Tetrapoda	Mammalia	Rodentia	Myomorpha	Muridae	apodemus	Apodemus_sp	muroids	11.5257	671	78
505	11441	11476	alphonse_laurence_aloin	37230	2016	3	Male	3	Tetrapoda	Mammalia	Rodentia	Myomorpha	Muridae	apodemus	Apodemus_sp	muroids	11.5257	671	78
506	13856	13891	alphonse_laurence_aloin	37230	2016	4	Male	3	Tetrapoda	Mammalia	Rodentia	Myomorpha	Muridae	apodemus	Apodemus_sp	muroids	11.5257	671	78
507	17264	17299	alphonse_laurence_aloin	37230	2016	5	Male	3	Tetrapoda	Mammalia	Rodentia	Myomorpha	Muridae	apodemus	Apodemus_sp	muroids	11.5257	671	78
508	17265	17300	alphonse_laurence_aloin	37230	2016	5	Male	3	Tetrapoda	Mammalia	Rodentia	Myomorpha	Muridae	apodemus	Apodemus_sp	muroids	11.5257	671	78
509	17267	17302	alphonse_laurence_aloin	37230	2016	5	Male	3	Tetrapoda	Mammalia	Rodentia	Myomorpha	Muridae	apodemus	Apodemus_sp	muroids	11.5257	671	78
510	17268	17303	alphonse_laurence_aloin	37230	2016	6	Male	3	Tetrapoda	Mammalia	Rodentia	Myomorpha	Muridae	apodemus	Apodemus_sp	muroids	11.5257	671	78
511	20312	20347	alphonse_laurence_aloin	37230	2016	7	Male	3	Tetrapoda	Mammalia	Rodentia	Myomorpha	Muridae	apodemus	Apodemus_sp	muroids	11.5257	671	78
512	24059	24094	alphonse_laurence_aloin	37230	2016	10	Male	3	Tetrapoda	Mammalia	Rodentia	Myomorpha	Muridae	apodemus	Apodemus_sp	muroids	11.5257	671	78
513	24063	24098	alphonse_laurence_aloin	37230	2016	11	Male	3	Tetrapoda	Mammalia	Rodentia	Myomorpha	Muridae	apodemus	Apodemus_sp	muroids	11.5257	671	78
514	24768	24803	alphonse_laurence_aloin	37230	2016	12	Male	3	Tetrapoda	Mammalia	Rodentia	Myomorpha	Muridae	apodemus	Apodemus_sp	muroids	11.5257	671	78
515	2411	2433	alphonse_laurence_aloin	37230	2015	8	Male	2	Tetrapoda	Mammalia	Eulipotyphla	Soricidae	Soricidae	Soricidae_gen_sp	Soricidae_gen_sp	soricids	11.5257	671	78
516	2533	2555	alphonse_laurence_aloin	37230	2015	8	Male	2	Tetrapoda	Mammalia	Eulipotyphla	Soricidae	Soricidae	Soricidae_gen_sp	Soricidae_gen_sp	soricids	11.5257	671	78
517	4021	4043	alphonse_laurence_aloin	37230	2015	9	Male	2	Tetrapoda	Mammalia	Eulipotyphla	Soricidae	Soricidae	Soricidae_gen_sp	Soricidae_gen_sp	soricids	11.5257	671	78
518	5504	5526	alphonse_laurence_aloin	37230	2015	10	Male	2	Tetrapoda	Mammalia	Eulipotyphla	Soricidae	Soricidae	Soricidae_gen_sp	Soricidae_gen_sp	soricids	11.5257	671	78
519	5765	5787	alphonse_laurence_aloin	37230	2015	10	Male	2	Tetrapoda	Mammalia	Eulipotyphla	Soricidae	Soricidae	Soricidae_gen_sp	Soricidae_gen_sp	soricids	11.5257	671	78
520	10471	10506	alphonse_laurence_aloin	37230	2016	2	Male	3	Tetrapoda	Mammalia	Eulipotyphla	Soricidae	Soricidae	Soricidae_gen_sp	Soricidae_gen_sp	soricids	11.5257	671	78
521	20311	20346	alphonse_laurence_aloin	37230	2016	7	Male	3	Tetrapoda	Mammalia	Eulipotyphla	Soricidae	Soricidae	Soricidae_gen_sp	Soricidae_gen_sp	soricids	11.5257	671	78
522	20313	20348	alphonse_laurence_aloin	37230	2016	6	Male	3	Tetrapoda	Mammalia	Eulipotyphla	Soricidae	Soricidae	Soricidae_gen_sp	Soricidae_gen_sp	soricids	11.5257	671	78
523	20317	20352	alphonse_laurence_aloin	37230	2016	7	Male	3	Tetrapoda	Mammalia	Rodentia	Myomorpha	Muroidea_fam_gen_sp	Muroidea_fam_gen_sp	Muroidea_fam_gen_sp	muroids	11.5257	671	78
524	20318	20353	alphonse_laurence_aloin	37230	2016	7	Male	3	Tetrapoda	Mammalia	Rodentia	Myomorpha	Muroidea_fam_gen_sp	Muroidea_fam_gen_sp	Muroidea_fam_gen_sp	muroids	11.5257	671	78
525	22245	22280	alphonse_laurence_aloin	37230	2016	8	Male	3	Tetrapoda	Mammalia	Rodentia	Myomorpha	Muroidea_fam_gen_sp	Muroidea_fam_gen_sp	Muroidea_fam_gen_sp	muroids	11.5257	671	78
526	22246	22281	alphonse_laurence_aloin	37230	2016	8	Male	3	Tetrapoda	Mammalia	Rodentia	Myomorpha	Muroidea_fam_gen_sp	Muroidea_fam_gen_sp	Muroidea_fam_gen_sp	muroids	11.5257	671	78
527	24770	24805	alphonse_laurence_aloin	37230	2016	12	Male	3	Tetrapoda	Mammalia	Rodentia	Myomorpha	Muroidea_fam_gen_sp	Muroidea_fam_gen_sp	Muroidea_fam_gen_sp	muroids	11.5257	671	78
528	24772	24807	alphonse_laurence_aloin	37230	2016	12	Male	3	Tetrapoda	Mammalia	Rodentia	Myomorpha	Muroidea_fam_gen_sp	Muroidea_fam_gen_sp	Muroidea_fam_gen_sp	muroids	11.5257	671	78
529	24773	24808	alphonse_laurence_aloin	37230	2016	12	Male	3	Tetrapoda	Mammalia	Rodentia	Myomorpha	Muroidea_fam_gen_sp	Muroidea_fam_gen_sp	Muroidea_fam_gen_sp	muroids	11.5257	671	78
530	25985	26020	alphonse_laurence_aloin	37230	2016	12	Male	3	Tetrapoda	Mammalia	Rodentia	Myomorpha	Muroidea_fam_gen_sp	Muroidea_fam_gen_sp	Muroidea_fam_gen_sp	muroids	11.5257	671	78
531	25986	26021	alphonse_laurence_aloin	37230	2017	1	Male	4	Tetrapoda	Mammalia	Rodentia	Myomorpha	Muroidea_fam_gen_sp	Muroidea_fam_gen_sp	Muroidea_fam_gen_sp	muroids	11.5257	671	78
532	25987	26022	alphonse_laurence_aloin	37230	2017	2	Male	4	Tetrapoda	Mammalia	Rodentia	Myomorpha	Muroidea_fam_gen_sp	Muroidea_fam_gen_sp	Muroidea_fam_gen_sp	muroids	11.5257	671	78
533	25989	26024	alphonse_laurence_aloin	37230	2017	2	Male	4	Tetrapoda	Mammalia	Rodentia	Myomorpha	Muroidea_fam_gen_sp	Muroidea_fam_gen_sp	Muroidea_fam_gen_sp	muroids	11.5257	671	78
534	27833	27868	alphonse_laurence_aloin	37230	2017	5	Male	4	Tetrapoda	Mammalia	Rodentia	Myomorpha	Muroidea_fam_gen_sp	Muroidea_fam_gen_sp	Muroidea_fam_gen_sp	muroids	11.5257	671	78
535	27834	27869	alphonse_laurence_aloin	37230	2017	5	Male	4	Tetrapoda	Mammalia	Rodentia	Myomorpha	Muroidea_fam_gen_sp	Muroidea_fam_gen_sp	Muroidea_fam_gen_sp	muroids	11.5257	671	78
536	27835	27870	alphonse_laurence_aloin	37230	2017	5	Male	4	Tetrapoda	Mammalia	Rodentia	Myomorpha	Muroidea_fam_gen_sp	Muroidea_fam_gen_sp	Muroidea_fam_gen_sp	muroids	11.5257	671	78
537	27837	27872	alphonse_laurence_aloin	37230	2017	5	Male	4	Tetrapoda	Mammalia	Rodentia	Myomorpha	Muroidea_fam_gen_sp	Muroidea_fam_gen_sp	Muroidea_fam_gen_sp	muroids	11.5257	671	78
538	28569	28604	alphonse_laurence_aloin	37230	2017	6	Male	4	Tetrapoda	Mammalia	Rodentia	Myomorpha	Muroidea_fam_gen_sp	Muroidea_fam_gen_sp	Muroidea_fam_gen_sp	muroids	11.5257	671	78
539	28570	28605	alphonse_laurence_aloin	37230	2017	6	Male	4	Tetrapoda	Mammalia	Rodentia	Myomorpha	Muroidea_fam_gen_sp	Muroidea_fam_gen_sp	Muroidea_fam_gen_sp	muroids	11.5257	671	78
540	28571	28606	alphonse_laurence_aloin	37230	2017	6	Male	4	Tetrapoda	Mammalia	Rodentia	Myomorpha	Muroidea_fam_gen_sp	Muroidea_fam_gen_sp	Muroidea_fam_gen_sp	muroids	11.5257	671	78
541	28573	28608	alphonse_laurence_aloin	37230	2017	6	Male	4	Tetrapoda	Mammalia	Rodentia	Myomorpha	Muroidea_fam_gen_sp	Muroidea_fam_gen_sp	Muroidea_fam_gen_sp	muroids	11.5257	671	78
542	28576	28611	alphonse_laurence_aloin	37230	2017	6	Male	4	Tetrapoda	Mammalia	Rodentia	Myomorpha	Muroidea_fam_gen_sp	Muroidea_fam_gen_sp	Muroidea_fam_gen_sp	muroids	11.5257	671	78
543	28577	28612	alphonse_laurence_aloin	37230	2017	6	Male	4	Tetrapoda	Mammalia	Rodentia	Myomorpha	Muroidea_fam_gen_sp	Muroidea_fam_gen_sp	Muroidea_fam_gen_sp	muroids	11.5257	671	78
544	28578	28613	alphonse_laurence_aloin	37230	2017	6	Male	4	Tetrapoda	Mammalia	Rodentia	Myomorpha	Muroidea_fam_gen_sp	Muroidea_fam_gen_sp	Muroidea_fam_gen_sp	muroids	11.5257	671	78
545	28579	28614	alphonse_laurence_aloin	37230	2017	6	Male	4	Tetrapoda	Mammalia	Rodentia	Myomorpha	Muroidea_fam_gen_sp	Muroidea_fam_gen_sp	Muroidea_fam_gen_sp	muroids	11.5257	671	78
546	28581	28616	alphonse_laurence_aloin	37230	2017	6	Male	4	Tetrapoda	Mammalia	Rodentia	Myomorpha	Muroidea_fam_gen_sp	Muroidea_fam_gen_sp	Muroidea_fam_gen_sp	muroids	11.5257	671	78
547	28583	28618	alphonse_laurence_aloin	37230	2017	6	Male	4	Tetrapoda	Mammalia	Rodentia	Myomorpha	Muroidea_fam_gen_sp	Muroidea_fam_gen_sp	Muroidea_fam_gen_sp	muroids	11.5257	671	78
548	28584	28619	alphonse_laurence_aloin	37230	2017	6	Male	4	Tetrapoda	Mammalia	Rodentia	Myomorpha	Muroidea_fam_gen_sp	Muroidea_fam_gen_sp	Muroidea_fam_gen_sp	muroids	11.5257	671	78
549	28586	28621	alphonse_laurence_aloin	37230	2017	6	Male	4	Tetrapoda	Mammalia	Rodentia	Myomorpha	Muroidea_fam_gen_sp	Muroidea_fam_gen_sp	Muroidea_fam_gen_sp	muroids	11.5257	671	78
550	28587	28622	alphonse_laurence_aloin	37230	2017	6	Male	4	Tetrapoda	Mammalia	Rodentia	Myomorpha	Muroidea_fam_gen_sp	Muroidea_fam_gen_sp	Muroidea_fam_gen_sp	muroids	11.5257	671	78
551	28589	28624	alphonse_laurence_aloin	37230	2017	6	Male	4	Tetrapoda	Mammalia	Rodentia	Myomorpha	Muroidea_fam_gen_sp	Muroidea_fam_gen_sp	Muroidea_fam_gen_sp	muroids	11.5257	671	78
552	28592	28627	alphonse_laurence_aloin	37230	2017	7	Male	4	Tetrapoda	Mammalia	Rodentia	Myomorpha	Muroidea_fam_gen_sp	Muroidea_fam_gen_sp	Muroidea_fam_gen_sp	muroids	11.5257	671	78
553	29976	30011	alphonse_laurence_aloin	37230	2017	7	Male	4	Tetrapoda	Mammalia	Rodentia	Myomorpha	Muroidea_fam_gen_sp	Muroidea_fam_gen_sp	Muroidea_fam_gen_sp	muroids	11.5257	671	78
554	29978	30013	alphonse_laurence_aloin	37230	2017	8	Male	4	Tetrapoda	Mammalia	Rodentia	Myomorpha	Muroidea_fam_gen_sp	Muroidea_fam_gen_sp	Muroidea_fam_gen_sp	muroids	11.5257	671	78
555	29979	30014	alphonse_laurence_aloin	37230	2017	9	Male	4	Tetrapoda	Mammalia	Rodentia	Myomorpha	Muroidea_fam_gen_sp	Muroidea_fam_gen_sp	Muroidea_fam_gen_sp	muroids	11.5257	671	78
556	29980	30015	alphonse_laurence_aloin	37230	2017	9	Male	4	Tetrapoda	Mammalia	Rodentia	Myomorpha	Muroidea_fam_gen_sp	Muroidea_fam_gen_sp	Muroidea_fam_gen_sp	muroids	11.5257	671	78
557	29981	30016	alphonse_laurence_aloin	37230	2017	9	Male	4	Tetrapoda	Mammalia	Rodentia	Myomorpha	Muroidea_fam_gen_sp	Muroidea_fam_gen_sp	Muroidea_fam_gen_sp	muroids	11.5257	671	78
558	29982	30017	alphonse_laurence_aloin	37230	2017	9	Male	4	Tetrapoda	Mammalia	Rodentia	Myomorpha	Muroidea_fam_gen_sp	Muroidea_fam_gen_sp	Muroidea_fam_gen_sp	muroids	11.5257	671	78
559	29983	30018	alphonse_laurence_aloin	37230	2017	9	Male	4	Tetrapoda	Mammalia	Rodentia	Myomorpha	Muroidea_fam_gen_sp	Muroidea_fam_gen_sp	Muroidea_fam_gen_sp	muroids	11.5257	671	78
560	29984	30019	alphonse_laurence_aloin	37230	2017	9	Male	4	Tetrapoda	Mammalia	Rodentia	Myomorpha	Muroidea_fam_gen_sp	Muroidea_fam_gen_sp	Muroidea_fam_gen_sp	muroids	11.5257	671	78
561	29986	30021	alphonse_laurence_aloin	37230	2017	9	Male	4	Tetrapoda	Mammalia	Rodentia	Myomorpha	Muroidea_fam_gen_sp	Muroidea_fam_gen_sp	Muroidea_fam_gen_sp	muroids	11.5257	671	78
562	9989	10016	alphonse_laurence_aloin	37230	2015	12	Male	2	Tetrapoda	Mammalia	Rodentia	Myomorpha	Muridae	micromys	Micromys_minutus	muroids	11.5257	671	78
563	22250	22285	alphonse_laurence_aloin	37230	2016	8	Male	3	Tetrapoda	Mammalia	Rodentia	Myomorpha	Muridae	mus	Mus_musculus	muroids	11.5257	671	78
564	2414	2436	alphonse_laurence_aloin	37230	2015	8	Male	2	Tetrapoda	Mammalia	Eulipotyphla	Talpidae	Talpidae	talpa	Talpa_sp	other_mammals	11.5257	671	78
565	2415	2437	alphonse_laurence_aloin	37230	2015	8	Male	2	Tetrapoda	Mammalia	Eulipotyphla	Talpidae	Talpidae	talpa	Talpa_sp	other_mammals	11.5257	671	78
566	2416	2438	alphonse_laurence_aloin	37230	2015	6	Male	2	Tetrapoda	Mammalia	Eulipotyphla	Talpidae	Talpidae	talpa	Talpa_sp	other_mammals	11.5257	671	78
567	2417	2439	alphonse_laurence_aloin	37230	2015	7	Male	2	Tetrapoda	Mammalia	Eulipotyphla	Talpidae	Talpidae	talpa	Talpa_sp	other_mammals	11.5257	671	78
568	7899	7926	alphonse_laurence_aloin	37230	2015	11	Male	2	Tetrapoda	Mammalia	Eulipotyphla	Talpidae	Talpidae	talpa	Talpa_sp	other_mammals	11.5257	671	78
569	11440	11475	alphonse_laurence_aloin	37230	2016	3	Male	3	Tetrapoda	Mammalia	Eulipotyphla	Talpidae	Talpidae	talpa	Talpa_sp	other_mammals	11.5257	671	78
570	13858	13893	alphonse_laurence_aloin	37230	2016	4	Male	3	Tetrapoda	Mammalia	Eulipotyphla	Talpidae	Talpidae	talpa	Talpa_sp	other_mammals	11.5257	671	78
571	22248	22283	alphonse_laurence_aloin	37230	2016	8	Male	3	Tetrapoda	Mammalia	Eulipotyphla	Talpidae	Talpidae	talpa	Talpa_sp	other_mammals	11.5257	671	78
572	22251	22286	alphonse_laurence_aloin	37230	2016	8	Male	3	Tetrapoda	Mammalia	Eulipotyphla	Talpidae	Talpidae	talpa	Talpa_sp	other_mammals	11.5257	671	78
573	22252	22287	alphonse_laurence_aloin	37230	2016	9	Male	3	Tetrapoda	Mammalia	Eulipotyphla	Talpidae	Talpidae	talpa	Talpa_sp	other_mammals	11.5257	671	78
574	24058	24093	alphonse_laurence_aloin	37230	2016	10	Male	3	Tetrapoda	Mammalia	Eulipotyphla	Talpidae	Talpidae	talpa	Talpa_sp	other_mammals	11.5257	671	78
575	24060	24095	alphonse_laurence_aloin	37230	2016	10	Male	3	Tetrapoda	Mammalia	Eulipotyphla	Talpidae	Talpidae	talpa	Talpa_sp	other_mammals	11.5257	671	78
576	24062	24097	alphonse_laurence_aloin	37230	2016	10	Male	3	Tetrapoda	Mammalia	Eulipotyphla	Talpidae	Talpidae	talpa	Talpa_sp	other_mammals	11.5257	671	78
577	2419	2441	alphonse_laurence_aloin	37230	2015	8	Male	2	Tetrapoda	Squamata	Squamata	Lacertilia	Lacertidae	podarcis	Podarcis_muralis	lacertilia	11.5257	671	78
578	5505	5527	alphonse_laurence_aloin	37230	2015	10	Male	2	Tetrapoda	Squamata	Squamata	Lacertilia	Lacertidae	podarcis	Podarcis_muralis	lacertilia	11.5257	671	78
579	9990	10017	alphonse_laurence_aloin	37230	2015	12	Male	2	Tetrapoda	Squamata	Squamata	Lacertilia	Lacertidae	podarcis	Podarcis_muralis	lacertilia	11.5257	671	78
580	10472	10507	alphonse_laurence_aloin	37230	2016	2	Male	3	Tetrapoda	Squamata	Squamata	Lacertilia	Lacertidae	podarcis	Podarcis_muralis	lacertilia	11.5257	671	78
581	11094	11129	alphonse_laurence_aloin	37230	2016	3	Male	3	Tetrapoda	Squamata	Squamata	Lacertilia	Lacertidae	podarcis	Podarcis_muralis	lacertilia	11.5257	671	78
582	11439	11474	alphonse_laurence_aloin	37230	2016	3	Male	3	Tetrapoda	Squamata	Squamata	Lacertilia	Lacertidae	podarcis	Podarcis_muralis	lacertilia	11.5257	671	78
583	11442	11477	alphonse_laurence_aloin	37230	2016	3	Male	3	Tetrapoda	Squamata	Squamata	Lacertilia	Lacertidae	podarcis	Podarcis_muralis	lacertilia	11.5257	671	78
584	13857	13892	alphonse_laurence_aloin	37230	2016	4	Male	3	Tetrapoda	Squamata	Squamata	Lacertilia	Lacertidae	podarcis	Podarcis_muralis	lacertilia	11.5257	671	78
585	17271	17306	alphonse_laurence_aloin	37230	2016	6	Male	3	Tetrapoda	Squamata	Squamata	Lacertilia	Lacertidae	podarcis	Podarcis_muralis	lacertilia	11.5257	671	78
586	20310	20345	alphonse_laurence_aloin	37230	2016	6	Male	3	Tetrapoda	Squamata	Squamata	Lacertilia	Lacertidae	podarcis	Podarcis_muralis	lacertilia	11.5257	671	78
587	22247	22282	alphonse_laurence_aloin	37230	2016	8	Male	3	Tetrapoda	Squamata	Squamata	Lacertilia	Lacertidae	podarcis	Podarcis_muralis	lacertilia	11.5257	671	78
588	22253	22288	alphonse_laurence_aloin	37230	2016	9	Male	3	Tetrapoda	Squamata	Squamata	Lacertilia	Lacertidae	podarcis	Podarcis_muralis	lacertilia	11.5257	671	78
589	27840	27875	alphonse_laurence_aloin	37230	2017	5	Male	4	Tetrapoda	Squamata	Squamata	Lacertilia	Lacertidae	podarcis	Podarcis_muralis	lacertilia	11.5257	671	78
590	27841	27876	alphonse_laurence_aloin	37230	2017	5	Male	4	Tetrapoda	Squamata	Squamata	Lacertilia	Lacertidae	podarcis	Podarcis_muralis	lacertilia	11.5257	671	78
591	27842	27877	alphonse_laurence_aloin	37230	2017	6	Male	4	Tetrapoda	Squamata	Squamata	Lacertilia	Lacertidae	podarcis	Podarcis_muralis	lacertilia	11.5257	671	78
592	28585	28620	alphonse_laurence_aloin	37230	2017	6	Male	4	Tetrapoda	Squamata	Squamata	Lacertilia	Lacertidae	podarcis	Podarcis_muralis	lacertilia	11.5257	671	78
593	28588	28623	alphonse_laurence_aloin	37230	2017	6	Male	4	Tetrapoda	Squamata	Squamata	Lacertilia	Lacertidae	podarcis	Podarcis_muralis	lacertilia	11.5257	671	78
594	28591	28626	alphonse_laurence_aloin	37230	2017	7	Male	4	Tetrapoda	Squamata	Squamata	Lacertilia	Lacertidae	podarcis	Podarcis_muralis	lacertilia	11.5257	671	78
595	29985	30020	alphonse_laurence_aloin	37230	2017	9	Male	4	Tetrapoda	Squamata	Squamata	Lacertilia	Lacertidae	podarcis	Podarcis_muralis	lacertilia	11.5257	671	78
596	10338	10373	altaor_aube-anaÃ´s_canela	29460	2015	12	Male	6	Tetrapoda	Mammalia	Lagomorpha	Leporidae	Leporidae	oryctolagus	Oryctolagus_cuniculus	other_mammals	11.4445	1061	26
597	1368	1390	altaor_roxane_peirazeau	92120	2015	8	Male	6	Tetrapoda	Aves	Columbiformes	Columbiformes	Columbidae	columba	Columba_sp	other_birds	11.5229	646	93
598	18002	18037	altaor_roxane_peirazeau	92120	2016	6	Male	7	Arthropoda	Hexapoda	Odonata	Odonata_fan_gen_sp	Odonata_fan_gen_sp	Odonata_fan_gen_sp	Odonata_fan_gen_sp	hexapods	11.5229	646	93
599	827	849	altaor_roxane_peirazeau	92120	2015	8	Male	6	Tetrapoda	Mammalia	Rodentia	Myomorpha	Muridae	mus	Mus_musculus	muroids	11.5229	646	93
600	4065	4087	altaor_roxane_peirazeau	92120	2015	9	Male	6	Tetrapoda	Mammalia	Rodentia	Myomorpha	Muridae	mus	Mus_musculus	muroids	11.5229	646	93
601	10866	10901	altaor_roxane_peirazeau	92120	2016	2	Male	7	Tetrapoda	Mammalia	Rodentia	Myomorpha	Muridae	mus	Mus_musculus	muroids	11.5229	646	93
602	10869	10904	altaor_roxane_peirazeau	92120	2016	2	Male	7	Tetrapoda	Mammalia	Rodentia	Myomorpha	Muridae	mus	Mus_musculus	muroids	11.5229	646	93
603	18542	18577	alya_delphine_milteau	37000	2016	6	Femelle	2	Tetrapoda	Aves	Passeriformes	Passeri	Passeridae	passer	Passer_domesticus	passeriforms	11.7126	673	93
604	13002	13037	alya_delphine_milteau	37000	2015	9	Femelle	1	Tetrapoda	Aves	Passeriformes	Passeri	Phylloscopidae	phylloscopus	Phylloscopus_collybita	passeriforms	11.7126	673	93
605	4231	4253	amande_florence__wyngaard	31280	2015	9	Femelle	3	Tetrapoda	Aves	Columbiformes	Columbiformes	Columbidae	streptopelia	Streptopelia_decaocto	other_birds	12.7965	696	71
606	10350	10385	amande_florence__wyngaard	31280	2016	2	Femelle	4	Tetrapoda	Squamata	Squamata	Lacertilia	Lacertilia_fam_gen_sp	Lacertilia_fam_gen_sp	Lacertilia_fam_gen_sp	lacertilia	12.7965	696	71
607	38146	Parisse_05_05_20_05_05_20	ame_noemie_parisse	54170	2020	5	Male	5	Tetrapoda	Aves	Passeriformes	Passeri	Muscicapidae	phoenicurus	Phoenicurus_ochruros	passeriforms	9.55175	769	51
608	38147	Parisse_18_04_20_18_04_20	ame_noemie_parisse	54170	2020	4	Male	5	Tetrapoda	Mammalia	Rodentia	Myomorpha	Muridae	rattus	Rattus_norvegicus	muroids	9.55175	769	51
609	10397	10432	ame_noemie_parisse	54170	2015	11	Male	0	Tetrapoda	Mammalia	Rodentia	Myomorpha	Muridae	mus	Mus_musculus	muroids	9.35158	769	45
610	27153	27188	amy_elisa_charamel	1960	2017	5	Femelle	1	Arthropoda	Hexapoda	Orthoptera	Ensifera	Gryllidae	Gryllidae_gen_sp	Gryllidae_gen_sp	hexapods	11.2275	975	81
611	NA	NA	amza_caroline_salvat	46230	2021	5	Femelle	0	Tetrapoda	Aves	Passeriformes	Passeri_fam_gen_sp	Passeri_fam_gen_sp	Passeri_fam_gen_sp	Passeri_fam_gen_sp	passeriforms	12.217	814	32
612	NA	NA	amza_caroline_salvat	46230	2021	5	Femelle	0	Tetrapoda	Aves	Passeriformes	Passeri	Muscicapidae	phoenicurus	Phoenicurus_ochruros	passeriforms	12.217	814	32
613	NA	NA	amza_caroline_salvat	46230	2021	6	Femelle	0	Tetrapoda	Mammalia	Rodentia	Myomorpha	Cricetidae	clethrionomys	Clethrionomys_glareolus	cricetids	12.217	814	32
614	NA	NA	amza_caroline_salvat	46230	2021	6	Femelle	0	Tetrapoda	Mammalia	Lagomorpha	Leporidae	Leporidae	oryctolagus	Oryctolagus_cuniculus	other_mammals	12.217	814	32
615	NA	NA	amza_caroline_salvat	46230	2021	6	Femelle	0	Tetrapoda	Mammalia	Lagomorpha	Leporidae	Leporidae	oryctolagus	Oryctolagus_cuniculus	other_mammals	12.217	814	32
616	NA	NA	amza_caroline_salvat	46230	2021	5	Femelle	0	Tetrapoda	Mammalia	Rodentia	Myomorpha	Muridae	apodemus	Apodemus_sp	muroids	12.217	814	32
617	NA	NA	amza_caroline_salvat	46230	2021	6	Femelle	0	Tetrapoda	Mammalia	Rodentia	Myomorpha	Muridae	apodemus	Apodemus_sylvaticus	muroids	12.217	814	32
618	NA	NA	amza_caroline_salvat	46230	2021	6	Femelle	0	Tetrapoda	Mammalia	Rodentia	Myomorpha	Muridae	apodemus	Apodemus_sylvaticus	muroids	12.217	814	32
619	NA	NA	amza_caroline_salvat	46230	2021	5	Femelle	0	Tetrapoda	Mammalia	Rodentia	Myomorpha	Muridae	apodemus	Apodemus_sylvaticus	muroids	12.217	814	32
620	NA	NA	amza_caroline_salvat	46230	2021	6	Femelle	0	Tetrapoda	Mammalia	Rodentia	Myomorpha	Muridae	apodemus	Apodemus_sylvaticus	muroids	12.217	814	32
621	NA	NA	amza_caroline_salvat	46230	2021	6	Femelle	0	Tetrapoda	Mammalia	Rodentia	Myomorpha	Muridae	apodemus	Apodemus_sylvaticus	muroids	12.217	814	32
622	NA	NA	amza_caroline_salvat	46230	2021	5	Femelle	0	Tetrapoda	Mammalia	Rodentia	Myomorpha	Muridae	apodemus	Apodemus_sylvaticus	muroids	12.217	814	32
623	NA	NA	amza_caroline_salvat	46230	2021	5	Femelle	0	Tetrapoda	Mammalia	Rodentia	Myomorpha	Muridae	apodemus	Apodemus_sylvaticus	muroids	12.217	814	32
624	NA	NA	amza_caroline_salvat	46230	2021	5	Femelle	0	Tetrapoda	Mammalia	Eulipotyphla	Soricidae	Soricidae	Soricidae_gen_sp	Soricidae_gen_sp	soricids	12.217	814	32
625	NA	NA	amza_caroline_salvat	46230	2021	6	Femelle	0	Tetrapoda	Mammalia	Rodentia	Myomorpha	Cricetidae	Cricetidae_gen_sp	Cricetidae_gen_sp	cricetids	12.217	814	32
626	NA	NA	amza_caroline_salvat	46230	2021	6	Femelle	0	Tetrapoda	Mammalia	Rodentia	Myomorpha	Muroidea_fam_gen_sp	Muroidea_fam_gen_sp	Muroidea_fam_gen_sp	muroids	12.217	814	32
627	NA	NA	amza_caroline_salvat	46230	2021	6	Femelle	0	Tetrapoda	Mammalia	Rodentia	Myomorpha	Muroidea_fam_gen_sp	Muroidea_fam_gen_sp	Muroidea_fam_gen_sp	muroids	12.217	814	32
628	NA	NA	amza_caroline_salvat	46230	2021	6	Femelle	0	Tetrapoda	Mammalia	Rodentia	Myomorpha	Muroidea_fam_gen_sp	Muroidea_fam_gen_sp	Muroidea_fam_gen_sp	muroids	12.217	814	32
629	NA	NA	amza_caroline_salvat	46230	2021	5	Femelle	0	Tetrapoda	Mammalia	Rodentia	Myomorpha	Muroidea_fam_gen_sp	Muroidea_fam_gen_sp	Muroidea_fam_gen_sp	muroids	12.217	814	32
630	NA	NA	amza_caroline_salvat	46230	2021	6	Femelle	0	Tetrapoda	Mammalia	Rodentia	Myomorpha	Muroidea_fam_gen_sp	Muroidea_fam_gen_sp	Muroidea_fam_gen_sp	muroids	12.217	814	32
631	NA	NA	amza_caroline_salvat	46230	2021	6	Femelle	0	Tetrapoda	Mammalia	Rodentia	Myomorpha	Muroidea_fam_gen_sp	Muroidea_fam_gen_sp	Muroidea_fam_gen_sp	muroids	12.217	814	32
632	NA	NA	amza_caroline_salvat	46230	2021	5	Femelle	0	Tetrapoda	Mammalia	Rodentia	Myomorpha	Muroidea_fam_gen_sp	Muroidea_fam_gen_sp	Muroidea_fam_gen_sp	muroids	12.217	814	32
633	NA	NA	amza_caroline_salvat	46230	2021	5	Femelle	0	Tetrapoda	Mammalia	Rodentia	Myomorpha	Muroidea_fam_gen_sp	Muroidea_fam_gen_sp	Muroidea_fam_gen_sp	muroids	12.217	814	32
634	NA	NA	amza_caroline_salvat	46230	2021	6	Femelle	0	Tetrapoda	Mammalia	Rodentia	Myomorpha	Muroidea_fam_gen_sp	Muroidea_fam_gen_sp	Muroidea_fam_gen_sp	muroids	12.217	814	32
635	13380	13415	anakin_lucile_ferriot	77930	2016	4	Male	11	Tetrapoda	Squamata	Squamata	Lacertilia	Lacertidae	podarcis	Podarcis_muralis	lacertilia	10.7103	624	46
636	1699	1721	ange_eugenie_goulet	51500	2015	8	Femelle	2	Tetrapoda	Aves	Passeriformes	Passeri	Turdidae	turdus	Turdus_merula	passeriforms	9.6505	661	28
637	2253	2275	ange_eugenie_goulet	51500	2015	8	Femelle	2	Tetrapoda	Mammalia	Rodentia	Myomorpha	Muridae	apodemus	Apodemus_sp	muroids	9.6505	661	28
638	1856	1878	ange_eugenie_goulet	51500	2015	8	Femelle	2	Tetrapoda	Mammalia	Eulipotyphla	Soricidae	Soricidae	Soricidae_gen_sp	Soricidae_gen_sp	soricids	9.6505	661	28
639	5367	5389	ange_eugenie_goulet	51500	2015	10	Femelle	2	Tetrapoda	Mammalia	Eulipotyphla	Soricidae	Soricidae	Soricidae_gen_sp	Soricidae_gen_sp	soricids	9.6505	661	28
640	1697	1719	ange_eugenie_goulet	51500	2015	8	Femelle	2	Tetrapoda	Mammalia	Rodentia	Myomorpha	Muridae	micromys	Micromys_minutus	muroids	9.6505	661	28
641	19040	19075	angel_amelie_biette	64300	2016	7	Male	14	Tetrapoda	Mammalia	Chiroptera	Chiroptera_fam_gen_sp	Chiroptera_fam_gen_sp	Chiroptera_fam_gen_sp	Chiroptera_fam_gen_sp	other_mammals	13.7545	1281	28
642	13470	13505	angel_amelie_biette	64300	2016	3	Male	14	Tetrapoda	Mammalia	Eulipotyphla	Soricidae	Soricidae	Soricidae_gen_sp	Soricidae_gen_sp	soricids	13.7545	1281	28
643	33654	33689	angie_daniel_duffy	71170	2018	9	Femelle	3	Tetrapoda	Aves	Passeriformes	Passeri	Troglodytidae	troglodytes	Troglodytes_troglodytes	passeriforms	9.73688	856	60
644	33668	33703	angie_daniel_duffy	71170	2018	9	Femelle	3	Tetrapoda	Mammalia	Rodentia	Myomorpha	Muridae	apodemus	Apodemus_sp	muroids	9.73688	856	60
645	33851	33886	angie_daniel_duffy	71170	2018	9	Femelle	4	Tetrapoda	Mammalia	Rodentia	Myomorpha	Muridae	apodemus	Apodemus_sp	muroids	9.73688	856	45
646	33869	33904	angie_daniel_duffy	71170	2018	10	Femelle	4	Tetrapoda	Mammalia	Rodentia	Myomorpha	Muridae	apodemus	Apodemus_sp	muroids	9.73688	856	45
647	33955	33990	angie_daniel_duffy	71170	2018	10	Femelle	4	Tetrapoda	Mammalia	Rodentia	Myomorpha	Muridae	apodemus	Apodemus_sp	muroids	9.73688	856	45
648	33956	33991	angie_daniel_duffy	71170	2018	10	Femelle	4	Tetrapoda	Mammalia	Rodentia	Myomorpha	Muridae	apodemus	Apodemus_sp	muroids	9.73688	856	45
649	34297	34332	angie_daniel_duffy	71170	2018	11	Femelle	4	Tetrapoda	Mammalia	Rodentia	Myomorpha	Muridae	apodemus	Apodemus_sp	muroids	9.73688	856	45
650	34260	34295	angie_daniel_duffy	71170	2018	11	Femelle	4	Tetrapoda	Mammalia	Rodentia	Myomorpha	Muridae	apodemus	Apodemus_sp	muroids	9.73688	856	45
651	33656	33691	angie_daniel_duffy	71170	2018	9	Femelle	3	Tetrapoda	Mammalia	Eulipotyphla	Soricidae	Soricidae	Soricidae_gen_sp	Soricidae_gen_sp	soricids	9.73688	856	60
652	33829	33864	angie_daniel_duffy	71170	2018	9	Femelle	4	Tetrapoda	Mammalia	Rodentia	Myomorpha	Cricetidae	Cricetidae_gen_sp	Cricetidae_gen_sp	cricetids	9.73688	856	45
653	33830	33865	angie_daniel_duffy	71170	2018	9	Femelle	4	Tetrapoda	Mammalia	Rodentia	Myomorpha	Cricetidae	Cricetidae_gen_sp	Cricetidae_gen_sp	cricetids	9.73688	856	45
654	33655	33690	angie_daniel_duffy	71170	2018	9	Femelle	3	Tetrapoda	Mammalia	Rodentia	Myomorpha	Muroidea_fam_gen_sp	Muroidea_fam_gen_sp	Muroidea_fam_gen_sp	muroids	9.73688	856	60
655	33657	33692	angie_daniel_duffy	71170	2018	9	Femelle	3	Tetrapoda	Mammalia	Rodentia	Myomorpha	Muroidea_fam_gen_sp	Muroidea_fam_gen_sp	Muroidea_fam_gen_sp	muroids	9.73688	856	60
656	34392	34427	angie_daniel_duffy	71170	2018	12	Femelle	4	Tetrapoda	Mammalia	Rodentia	Myomorpha	Muroidea_fam_gen_sp	Muroidea_fam_gen_sp	Muroidea_fam_gen_sp	muroids	9.73688	856	45
657	34393	34428	angie_daniel_duffy	71170	2018	12	Femelle	4	Tetrapoda	Mammalia	Rodentia	Myomorpha	Muroidea_fam_gen_sp	Muroidea_fam_gen_sp	Muroidea_fam_gen_sp	muroids	9.73688	856	45
658	34391	34426	angie_daniel_duffy	71170	2018	12	Femelle	4	Tetrapoda	Mammalia	Rodentia	Myomorpha	Muroidea_fam_gen_sp	Muroidea_fam_gen_sp	Muroidea_fam_gen_sp	muroids	9.73688	856	45
659	34296	34331	angie_daniel_duffy	71170	2018	11	Femelle	4	Tetrapoda	Mammalia	Rodentia	Myomorpha	Muridae	mus	Mus_musculus	muroids	9.73688	856	45
660	34298	34333	angie_daniel_duffy	71170	2018	11	Femelle	4	Tetrapoda	Mammalia	Rodentia	Myomorpha	Muridae	mus	Mus_musculus	muroids	9.73688	856	45
661	33658	33693	angie_daniel_duffy	71170	2018	8	Femelle	3	Tetrapoda	Mammalia	Eulipotyphla	Talpidae	Talpidae	talpa	Talpa_sp	other_mammals	9.73688	856	60
662	NA	NA	angus_claire_langevin	3190	2021	5	Male	0	Tetrapoda	Aves	Passeriformes	Passeri	Turdidae	turdus	Turdus_merula	passeriforms	11.112	688	43
663	5219	5241	antares_gaetan_willaime	21130	2015	10	Femelle	12	Tetrapoda	Mammalia	Rodentia	Myomorpha	Cricetidae	Cricetidae_gen_sp	Cricetidae_gen_sp	cricetids	10.954	902	75
664	11581	11616	antares_gaetan_willaime	21130	2016	3	Femelle	13	Tetrapoda	Squamata	Squamata	Lacertilia	Lacertidae	podarcis	Podarcis_muralis	lacertilia	10.954	902	75
665	1852	1874	anubis_aude_gotteland	73370	2015	4	Male	10	Tetrapoda	Mammalia	Chiroptera	Chiroptera_fam_gen_sp	Chiroptera_fam_gen_sp	Chiroptera_fam_gen_sp	Chiroptera_fam_gen_sp	other_mammals	11.0363	1018	39
666	25214	25249	apache_jean_michel_agasse	65150	2017	1	Femelle	15	Tetrapoda	Aves	Passeriformes	Passeri	Turdidae	turdus	Turdus_merula	passeriforms	11.335	1106	40
667	18765	18800	apache_jean_michel_agasse	65150	2016	7	Femelle	14	Tetrapoda	Mammalia	Eulipotyphla	Soricidae	Soricidae	Soricidae_gen_sp	Soricidae_gen_sp	soricids	11.335	1106	40
668	23992	24027	api_france_mondoloni	79410	2016	11	Male	2	Tetrapoda	Aves	Passeriformes	Passeri	Sylviidae	sylvia	Sylvia_atricapilla	passeriforms	12.1788	828	43
669	24717	24752	api_france_mondoloni	79410	2016	12	Male	2	Tetrapoda	Aves	Passeriformes	Passeri	Turdidae	turdus	Turdus_merula	passeriforms	12.1788	828	43
670	25779	25814	api_france_mondoloni	79410	2017	2	Male	3	Tetrapoda	Aves	Passeriformes	Passeri	Turdidae	turdus	Turdus_merula	passeriforms	12.1788	828	43
671	21163	21198	api_france_mondoloni	79410	2016	8	Male	2	Tetrapoda	Aves	Passeriformes	Passeri	Paridae	parus	Parus_major	passeriforms	12.1788	828	43
672	35455	35490	api_france_mondoloni	79410	2019	5	Male	5	Tetrapoda	Aves	Passeriformes	Passeri	Passeridae	passer	Passer_domesticus	passeriforms	12.1788	828	43
673	24650	24685	api_france_mondoloni	79410	2016	12	Male	2	Tetrapoda	Aves	Aves_ord_fam_gen_sp	Aves_ord_fam_gen_sp	Aves_ord_fam_gen_sp	Aves_ord_fam_gen_sp	Aves_ord_fam_gen_sp	other_birds	12.1788	828	43
674	27662	27697	api_france_mondoloni	79410	2017	5	Male	3	Tetrapoda	Aves	Passeriformes	Passeri_fam_gen_sp	Passeri_fam_gen_sp	Passeri_fam_gen_sp	Passeri_fam_gen_sp	passeriforms	12.1788	828	43
675	27873	27908	api_france_mondoloni	79410	2017	6	Male	3	Tetrapoda	Aves	Passeriformes	Passeri_fam_gen_sp	Passeri_fam_gen_sp	Passeri_fam_gen_sp	Passeri_fam_gen_sp	passeriforms	12.1788	828	43
676	23064	23099	api_france_mondoloni	79410	2016	9	Male	2	Tetrapoda	Aves	Passeriformes	Passeri	Fringillidae	fringilla	Fringilla_coelebs	passeriforms	12.1788	828	43
677	25534	25569	api_france_mondoloni	79410	2017	1	Male	3	Tetrapoda	Aves	Passeriformes	Passeri	Muscicapidae	erithacus	Erithacus_rubecula	passeriforms	12.1788	828	43
678	27152	27187	api_france_mondoloni	79410	2017	5	Male	3	Tetrapoda	Aves	Passeriformes	Passeri	Troglodytidae	troglodytes	Troglodytes_troglodytes	passeriforms	12.1788	828	43
679	23593	23628	api_france_mondoloni	79410	2016	10	Male	2	Tetrapoda	Aves	Passeriformes	Passeri	Troglodytidae	troglodytes	Troglodytes_troglodytes	passeriforms	12.1788	828	43
680	12684	12719	api_france_mondoloni	79410	2016	4	Male	2	Tetrapoda	Aves	Passeriformes	Passeri	Troglodytidae	troglodytes	Troglodytes_troglodytes	passeriforms	12.1788	828	43
681	25566	25601	api_france_mondoloni	79410	2017	1	Male	3	Tetrapoda	Aves	Passeriformes	Passeri	Troglodytidae	troglodytes	Troglodytes_troglodytes	passeriforms	12.1788	828	43
682	36177	36212	api_france_mondoloni	79410	2019	7	Male	5	Tetrapoda	Mammalia	Rodentia	Myomorpha	Cricetidae	microtus	Microtus_arvalis	cricetids	12.1788	828	43
683	36635	36671	api_france_mondoloni	79410	2019	8	Male	5	Tetrapoda	Mammalia	Rodentia	Myomorpha	Cricetidae	microtus	Microtus_arvalis	cricetids	12.1788	828	43
684	36276	36311	api_france_mondoloni	79410	2019	7	Male	5	Tetrapoda	Mammalia	Rodentia	Myomorpha	Cricetidae	microtus	Microtus_arvalis	cricetids	12.1788	828	43
685	36277	36312	api_france_mondoloni	79410	2019	7	Male	5	Tetrapoda	Mammalia	Rodentia	Myomorpha	Cricetidae	microtus	Microtus_arvalis	cricetids	12.1788	828	43
686	36834	36870	api_france_mondoloni	79410	2019	9	Male	5	Tetrapoda	Mammalia	Rodentia	Myomorpha	Cricetidae	microtus	Microtus_arvalis	cricetids	12.1788	828	43
687	35183	35218	api_france_mondoloni	79410	2019	4	Male	5	Tetrapoda	Mammalia	Rodentia	Myomorpha	Cricetidae	microtus	Microtus_arvalis	cricetids	12.1788	828	43
688	35385	35420	api_france_mondoloni	79410	2019	5	Male	5	Tetrapoda	Mammalia	Rodentia	Myomorpha	Cricetidae	microtus	Microtus_arvalis	cricetids	12.1788	828	43
689	36241	36276	api_france_mondoloni	79410	2019	7	Male	5	Tetrapoda	Mammalia	Rodentia	Myomorpha	Cricetidae	microtus	Microtus_arvalis	cricetids	12.1788	828	43
690	36274	36309	api_france_mondoloni	79410	2019	7	Male	5	Tetrapoda	Mammalia	Rodentia	Myomorpha	Cricetidae	microtus	Microtus_arvalis	cricetids	12.1788	828	43
691	36354	36389	api_france_mondoloni	79410	2019	8	Male	5	Tetrapoda	Mammalia	Rodentia	Myomorpha	Cricetidae	microtus	Microtus_arvalis	cricetids	12.1788	828	43
692	35217	35252	api_france_mondoloni	79410	2019	5	Male	5	Tetrapoda	Mammalia	Rodentia	Myomorpha	Cricetidae	microtus	Microtus_arvalis	cricetids	12.1788	828	43
693	36188	36223	api_france_mondoloni	79410	2019	7	Male	5	Tetrapoda	Mammalia	Rodentia	Myomorpha	Cricetidae	microtus	Microtus_arvalis	cricetids	12.1788	828	43
694	36296	36331	api_france_mondoloni	79410	2019	7	Male	5	Tetrapoda	Mammalia	Rodentia	Myomorpha	Cricetidae	microtus	Microtus_arvalis	cricetids	12.1788	828	43
695	36320	36355	api_france_mondoloni	79410	2019	7	Male	5	Tetrapoda	Mammalia	Rodentia	Myomorpha	Cricetidae	microtus	Microtus_arvalis	cricetids	12.1788	828	43
696	36242	36277	api_france_mondoloni	79410	2019	7	Male	5	Tetrapoda	Mammalia	Rodentia	Myomorpha	Cricetidae	microtus	Microtus_arvalis	cricetids	12.1788	828	43
697	38100	MONDOLONI_04_01_20_28_04_20	api_france_mondoloni	79410	2020	1	Male	6	Tetrapoda	Mammalia	Rodentia	Myomorpha	Cricetidae	microtus	Microtus_arvalis	cricetids	12.1788	828	43
698	35070	35105	api_france_mondoloni	79410	2019	4	Male	5	Tetrapoda	Mammalia	Rodentia	Myomorpha	Cricetidae	microtus	Microtus_arvalis	cricetids	12.1788	828	43
699	35644	35679	api_france_mondoloni	79410	2019	6	Male	5	Tetrapoda	Mammalia	Rodentia	Myomorpha	Cricetidae	microtus	Microtus_arvalis	cricetids	12.1788	828	43
700	35614	35649	api_france_mondoloni	79410	2019	6	Male	5	Tetrapoda	Mammalia	Rodentia	Myomorpha	Cricetidae	microtus	Microtus_arvalis	cricetids	12.1788	828	43
701	36099	36134	api_france_mondoloni	79410	2019	7	Male	5	Tetrapoda	Mammalia	Rodentia	Myomorpha	Cricetidae	microtus	Microtus_arvalis	cricetids	12.1788	828	43
702	35204	35239	api_france_mondoloni	79410	2019	4	Male	5	Tetrapoda	Mammalia	Rodentia	Myomorpha	Cricetidae	microtus	Microtus_arvalis	cricetids	12.1788	828	43
703	38103	MONDOLONI_19_12_19_28_04_20	api_france_mondoloni	79410	2019	12	Male	5	Tetrapoda	Mammalia	Rodentia	Myomorpha	Cricetidae	microtus	Microtus_arvalis	cricetids	12.1788	828	43
704	38106	MONDOLONI_24_12_19_28_04_20	api_france_mondoloni	79410	2019	12	Male	5	Tetrapoda	Mammalia	Rodentia	Myomorpha	Cricetidae	microtus	Microtus_arvalis	cricetids	12.1788	828	43
705	38107	MONDOLONI_24_12_19_28_04_20	api_france_mondoloni	79410	2019	12	Male	5	Tetrapoda	Mammalia	Rodentia	Myomorpha	Cricetidae	microtus	Microtus_arvalis	cricetids	12.1788	828	43
706	37384	37441	api_france_mondoloni	79410	2019	11	Male	5	Tetrapoda	Mammalia	Rodentia	Myomorpha	Cricetidae	microtus	Microtus_arvalis	cricetids	12.1788	828	43
707	37387	37444	api_france_mondoloni	79410	2019	11	Male	5	Tetrapoda	Mammalia	Rodentia	Myomorpha	Cricetidae	microtus	Microtus_arvalis	cricetids	12.1788	828	43
708	37546	37603	api_france_mondoloni	79410	2019	12	Male	5	Tetrapoda	Mammalia	Rodentia	Myomorpha	Cricetidae	microtus	Microtus_arvalis	cricetids	12.1788	828	43
709	37547	37604	api_france_mondoloni	79410	2019	12	Male	5	Tetrapoda	Mammalia	Rodentia	Myomorpha	Cricetidae	microtus	Microtus_arvalis	cricetids	12.1788	828	43
710	37553	37610	api_france_mondoloni	79410	2019	12	Male	5	Tetrapoda	Mammalia	Rodentia	Myomorpha	Cricetidae	microtus	Microtus_arvalis	cricetids	12.1788	828	43
711	19841	19876	api_france_mondoloni	79410	2016	7	Male	2	Tetrapoda	Mammalia	Rodentia	Myomorpha	Cricetidae	Cricetidae_gen_sp	Cricetidae_gen_sp	cricetids	12.1788	828	43
712	21162	21197	api_france_mondoloni	79410	2016	8	Male	2	Tetrapoda	Mammalia	Rodentia	Myomorpha	Cricetidae	Cricetidae_gen_sp	Cricetidae_gen_sp	cricetids	12.1788	828	43
713	22011	22046	api_france_mondoloni	79410	2016	8	Male	2	Tetrapoda	Mammalia	Rodentia	Myomorpha	Cricetidae	Cricetidae_gen_sp	Cricetidae_gen_sp	cricetids	12.1788	828	43
714	24716	24751	api_france_mondoloni	79410	2016	12	Male	2	Tetrapoda	Mammalia	Rodentia	Myomorpha	Cricetidae	Cricetidae_gen_sp	Cricetidae_gen_sp	cricetids	12.1788	828	43
715	25932	25967	api_france_mondoloni	79410	2017	2	Male	3	Tetrapoda	Mammalia	Rodentia	Myomorpha	Cricetidae	Cricetidae_gen_sp	Cricetidae_gen_sp	cricetids	12.1788	828	43
716	26320	26355	api_france_mondoloni	79410	2017	3	Male	3	Tetrapoda	Mammalia	Rodentia	Myomorpha	Cricetidae	Cricetidae_gen_sp	Cricetidae_gen_sp	cricetids	12.1788	828	43
717	26912	26947	api_france_mondoloni	79410	2017	4	Male	3	Tetrapoda	Mammalia	Rodentia	Myomorpha	Cricetidae	Cricetidae_gen_sp	Cricetidae_gen_sp	cricetids	12.1788	828	43
718	26933	26968	api_france_mondoloni	79410	2017	4	Male	3	Tetrapoda	Mammalia	Rodentia	Myomorpha	Cricetidae	Cricetidae_gen_sp	Cricetidae_gen_sp	cricetids	12.1788	828	43
719	29033	29068	api_france_mondoloni	79410	2017	7	Male	3	Tetrapoda	Mammalia	Rodentia	Myomorpha	Cricetidae	Cricetidae_gen_sp	Cricetidae_gen_sp	cricetids	12.1788	828	43
720	34847	34882	api_france_mondoloni	79410	2019	3	Male	5	Tetrapoda	Mammalia	Rodentia	Myomorpha	Cricetidae	Cricetidae_gen_sp	Cricetidae_gen_sp	cricetids	12.1788	828	43
721	17007	17042	api_france_mondoloni	79410	2016	6	Male	2	Tetrapoda	Mammalia	Chiroptera	Chiroptera_fam_gen_sp	Chiroptera_fam_gen_sp	Chiroptera_fam_gen_sp	Chiroptera_fam_gen_sp	other_mammals	12.1788	828	43
722	17008	17043	api_france_mondoloni	79410	2016	6	Male	2	Tetrapoda	Mammalia	Chiroptera	Chiroptera_fam_gen_sp	Chiroptera_fam_gen_sp	Chiroptera_fam_gen_sp	Chiroptera_fam_gen_sp	other_mammals	12.1788	828	43
723	22477	22512	api_france_mondoloni	79410	2016	9	Male	2	Tetrapoda	Mammalia	Lagomorpha	Leporidae	Leporidae	oryctolagus	Oryctolagus_cuniculus	other_mammals	12.1788	828	43
724	12602	12637	api_france_mondoloni	79410	2016	4	Male	2	Tetrapoda	Mammalia	Mammalia_ord_fam_gen_sp	Mammalia_ord_fam_gen_sp	Mammalia_ord_fam_gen_sp	Mammalia_ord_fam_gen_sp	Mammalia_ord_fam_gen_sp	other_mammals	12.1788	828	43
725	13620	13655	api_france_mondoloni	79410	2016	4	Male	2	Tetrapoda	Mammalia	Mammalia_ord_fam_gen_sp	Mammalia_ord_fam_gen_sp	Mammalia_ord_fam_gen_sp	Mammalia_ord_fam_gen_sp	Mammalia_ord_fam_gen_sp	other_mammals	12.1788	828	43
726	17748	17783	api_france_mondoloni	79410	2016	6	Male	2	Tetrapoda	Mammalia	Mammalia_ord_fam_gen_sp	Mammalia_ord_fam_gen_sp	Mammalia_ord_fam_gen_sp	Mammalia_ord_fam_gen_sp	Mammalia_ord_fam_gen_sp	other_mammals	12.1788	828	43
727	17749	17784	api_france_mondoloni	79410	2016	6	Male	2	Tetrapoda	Mammalia	Mammalia_ord_fam_gen_sp	Mammalia_ord_fam_gen_sp	Mammalia_ord_fam_gen_sp	Mammalia_ord_fam_gen_sp	Mammalia_ord_fam_gen_sp	other_mammals	12.1788	828	43
728	17843	17878	api_france_mondoloni	79410	2016	6	Male	2	Tetrapoda	Mammalia	Mammalia_ord_fam_gen_sp	Mammalia_ord_fam_gen_sp	Mammalia_ord_fam_gen_sp	Mammalia_ord_fam_gen_sp	Mammalia_ord_fam_gen_sp	other_mammals	12.1788	828	43
729	34846	34881	api_france_mondoloni	79410	2019	3	Male	5	Tetrapoda	Mammalia	Rodentia	Myomorpha	Muridae	apodemus	Apodemus_sp	muroids	12.1788	828	43
730	19284	19319	api_france_mondoloni	79410	2016	7	Male	2	Tetrapoda	Mammalia	Rodentia	Myomorpha	Muridae	apodemus	Apodemus_sp	muroids	12.1788	828	43
731	20974	21009	api_france_mondoloni	79410	2016	8	Male	2	Tetrapoda	Mammalia	Rodentia	Myomorpha	Muridae	apodemus	Apodemus_sp	muroids	12.1788	828	43
732	26724	26759	api_france_mondoloni	79410	2017	4	Male	3	Tetrapoda	Mammalia	Rodentia	Myomorpha	Muridae	apodemus	Apodemus_sp	muroids	12.1788	828	43
733	27223	27258	api_france_mondoloni	79410	2017	5	Male	3	Tetrapoda	Mammalia	Rodentia	Myomorpha	Muridae	apodemus	Apodemus_sp	muroids	12.1788	828	43
734	36278	36313	api_france_mondoloni	79410	2019	7	Male	5	Tetrapoda	Mammalia	Rodentia	Myomorpha	Muridae	apodemus	Apodemus_sylvaticus	muroids	12.1788	828	43
735	36833	36869	api_france_mondoloni	79410	2019	9	Male	5	Tetrapoda	Mammalia	Rodentia	Myomorpha	Muridae	apodemus	Apodemus_sylvaticus	muroids	12.1788	828	43
736	35386	35421	api_france_mondoloni	79410	2019	5	Male	5	Tetrapoda	Mammalia	Rodentia	Myomorpha	Muridae	apodemus	Apodemus_sylvaticus	muroids	12.1788	828	43
737	35454	35489	api_france_mondoloni	79410	2019	5	Male	5	Tetrapoda	Mammalia	Rodentia	Myomorpha	Muridae	apodemus	Apodemus_sylvaticus	muroids	12.1788	828	43
738	35453	35488	api_france_mondoloni	79410	2019	5	Male	5	Tetrapoda	Mammalia	Rodentia	Myomorpha	Muridae	apodemus	Apodemus_sylvaticus	muroids	12.1788	828	43
739	36321	36356	api_france_mondoloni	79410	2019	7	Male	5	Tetrapoda	Mammalia	Rodentia	Myomorpha	Muridae	apodemus	Apodemus_sylvaticus	muroids	12.1788	828	43
740	35218	35253	api_france_mondoloni	79410	2019	5	Male	5	Tetrapoda	Mammalia	Rodentia	Myomorpha	Muridae	apodemus	Apodemus_sylvaticus	muroids	12.1788	828	43
741	35598	35633	api_france_mondoloni	79410	2019	6	Male	5	Tetrapoda	Mammalia	Rodentia	Myomorpha	Muridae	apodemus	Apodemus_sylvaticus	muroids	12.1788	828	43
742	35646	35681	api_france_mondoloni	79410	2019	6	Male	5	Tetrapoda	Mammalia	Rodentia	Myomorpha	Muridae	apodemus	Apodemus_sylvaticus	muroids	12.1788	828	43
743	35347	35382	api_france_mondoloni	79410	2019	5	Male	5	Tetrapoda	Mammalia	Rodentia	Myomorpha	Muridae	apodemus	Apodemus_sylvaticus	muroids	12.1788	828	43
744	35429	35464	api_france_mondoloni	79410	2019	5	Male	5	Tetrapoda	Mammalia	Rodentia	Myomorpha	Muridae	apodemus	Apodemus_sylvaticus	muroids	12.1788	828	43
745	35615	35650	api_france_mondoloni	79410	2019	6	Male	5	Tetrapoda	Mammalia	Rodentia	Myomorpha	Muridae	apodemus	Apodemus_sylvaticus	muroids	12.1788	828	43
746	36176	36211	api_france_mondoloni	79410	2019	7	Male	5	Tetrapoda	Mammalia	Rodentia	Myomorpha	Muridae	apodemus	Apodemus_sylvaticus	muroids	12.1788	828	43
747	35384	35419	api_france_mondoloni	79410	2019	5	Male	5	Tetrapoda	Mammalia	Rodentia	Myomorpha	Muridae	apodemus	Apodemus_sylvaticus	muroids	12.1788	828	43
748	36275	36310	api_france_mondoloni	79410	2019	7	Male	5	Tetrapoda	Mammalia	Rodentia	Myomorpha	Muridae	apodemus	Apodemus_sylvaticus	muroids	12.1788	828	43
749	35597	35632	api_france_mondoloni	79410	2019	6	Male	5	Tetrapoda	Mammalia	Rodentia	Myomorpha	Muridae	apodemus	Apodemus_sylvaticus	muroids	12.1788	828	43
750	36061	36096	api_france_mondoloni	79410	2019	7	Male	5	Tetrapoda	Mammalia	Rodentia	Myomorpha	Muridae	apodemus	Apodemus_sylvaticus	muroids	12.1788	828	43
751	35203	35238	api_france_mondoloni	79410	2019	4	Male	5	Tetrapoda	Mammalia	Rodentia	Myomorpha	Muridae	apodemus	Apodemus_sylvaticus	muroids	12.1788	828	43
752	35219	35254	api_france_mondoloni	79410	2019	5	Male	5	Tetrapoda	Mammalia	Rodentia	Myomorpha	Muridae	apodemus	Apodemus_sylvaticus	muroids	12.1788	828	43
753	35233	35268	api_france_mondoloni	79410	2019	5	Male	5	Tetrapoda	Mammalia	Rodentia	Myomorpha	Muridae	apodemus	Apodemus_sylvaticus	muroids	12.1788	828	43
754	35359	35394	api_france_mondoloni	79410	2019	5	Male	5	Tetrapoda	Mammalia	Rodentia	Myomorpha	Muridae	apodemus	Apodemus_sylvaticus	muroids	12.1788	828	43
755	35150	35185	api_france_mondoloni	79410	2019	4	Male	5	Tetrapoda	Mammalia	Rodentia	Myomorpha	Muridae	apodemus	Apodemus_sylvaticus	muroids	12.1788	828	43
756	36187	36222	api_france_mondoloni	79410	2019	7	Male	5	Tetrapoda	Mammalia	Rodentia	Myomorpha	Muridae	apodemus	Apodemus_sylvaticus	muroids	12.1788	828	43
757	36145	36180	api_france_mondoloni	79410	2019	7	Male	5	Tetrapoda	Mammalia	Rodentia	Myomorpha	Muridae	apodemus	Apodemus_sylvaticus	muroids	12.1788	828	43
758	36297	36332	api_france_mondoloni	79410	2019	7	Male	5	Tetrapoda	Mammalia	Rodentia	Myomorpha	Muridae	apodemus	Apodemus_sylvaticus	muroids	12.1788	828	43
759	35643	35678	api_france_mondoloni	79410	2019	6	Male	5	Tetrapoda	Mammalia	Rodentia	Myomorpha	Muridae	apodemus	Apodemus_sylvaticus	muroids	12.1788	828	43
760	38105	MONDOLONI_24_01_20_28_04_20	api_france_mondoloni	79410	2020	1	Male	6	Tetrapoda	Mammalia	Rodentia	Myomorpha	Muridae	apodemus	Apodemus_sylvaticus	muroids	12.1788	828	43
761	12484	12519	api_france_mondoloni	79410	2016	4	Male	2	Tetrapoda	Mammalia	Rodentia	Myomorpha	Muridae	apodemus	Apodemus_sylvaticus	muroids	12.1788	828	43
762	12599	12634	api_france_mondoloni	79410	2016	4	Male	2	Tetrapoda	Mammalia	Rodentia	Myomorpha	Muridae	apodemus	Apodemus_sylvaticus	muroids	12.1788	828	43
763	12662	12697	api_france_mondoloni	79410	2016	4	Male	2	Tetrapoda	Mammalia	Rodentia	Myomorpha	Muridae	apodemus	Apodemus_sylvaticus	muroids	12.1788	828	43
764	13496	13531	api_france_mondoloni	79410	2016	4	Male	2	Tetrapoda	Mammalia	Rodentia	Myomorpha	Muridae	apodemus	Apodemus_sylvaticus	muroids	12.1788	828	43
765	13699	13734	api_france_mondoloni	79410	2016	4	Male	2	Tetrapoda	Mammalia	Rodentia	Myomorpha	Muridae	apodemus	Apodemus_sylvaticus	muroids	12.1788	828	43
766	14095	14130	api_france_mondoloni	79410	2016	4	Male	2	Tetrapoda	Mammalia	Rodentia	Myomorpha	Muridae	apodemus	Apodemus_sylvaticus	muroids	12.1788	828	43
767	14096	14131	api_france_mondoloni	79410	2016	4	Male	2	Tetrapoda	Mammalia	Rodentia	Myomorpha	Muridae	apodemus	Apodemus_sylvaticus	muroids	12.1788	828	43
768	14574	14609	api_france_mondoloni	79410	2016	5	Male	2	Tetrapoda	Mammalia	Rodentia	Myomorpha	Muridae	apodemus	Apodemus_sylvaticus	muroids	12.1788	828	43
769	14575	14610	api_france_mondoloni	79410	2016	5	Male	2	Tetrapoda	Mammalia	Rodentia	Myomorpha	Muridae	apodemus	Apodemus_sylvaticus	muroids	12.1788	828	43
770	14698	14733	api_france_mondoloni	79410	2016	5	Male	2	Tetrapoda	Mammalia	Rodentia	Myomorpha	Muridae	apodemus	Apodemus_sylvaticus	muroids	12.1788	828	43
771	14699	14734	api_france_mondoloni	79410	2016	5	Male	2	Tetrapoda	Mammalia	Rodentia	Myomorpha	Muridae	apodemus	Apodemus_sylvaticus	muroids	12.1788	828	43
772	14857	14892	api_france_mondoloni	79410	2016	5	Male	2	Tetrapoda	Mammalia	Rodentia	Myomorpha	Muridae	apodemus	Apodemus_sylvaticus	muroids	12.1788	828	43
773	15193	15228	api_france_mondoloni	79410	2016	5	Male	2	Tetrapoda	Mammalia	Rodentia	Myomorpha	Muridae	apodemus	Apodemus_sylvaticus	muroids	12.1788	828	43
774	15194	15229	api_france_mondoloni	79410	2016	5	Male	2	Tetrapoda	Mammalia	Rodentia	Myomorpha	Muridae	apodemus	Apodemus_sylvaticus	muroids	12.1788	828	43
775	15312	15347	api_france_mondoloni	79410	2016	5	Male	2	Tetrapoda	Mammalia	Rodentia	Myomorpha	Muridae	apodemus	Apodemus_sylvaticus	muroids	12.1788	828	43
776	16960	16995	api_france_mondoloni	79410	2016	6	Male	2	Tetrapoda	Mammalia	Rodentia	Myomorpha	Muridae	apodemus	Apodemus_sylvaticus	muroids	12.1788	828	43
777	16961	16996	api_france_mondoloni	79410	2016	6	Male	2	Tetrapoda	Mammalia	Rodentia	Myomorpha	Muridae	apodemus	Apodemus_sylvaticus	muroids	12.1788	828	43
778	16962	16997	api_france_mondoloni	79410	2016	6	Male	2	Tetrapoda	Mammalia	Rodentia	Myomorpha	Muridae	apodemus	Apodemus_sylvaticus	muroids	12.1788	828	43
779	17175	17210	api_france_mondoloni	79410	2016	6	Male	2	Tetrapoda	Mammalia	Rodentia	Myomorpha	Muridae	apodemus	Apodemus_sylvaticus	muroids	12.1788	828	43
780	17750	17785	api_france_mondoloni	79410	2016	6	Male	2	Tetrapoda	Mammalia	Rodentia	Myomorpha	Muridae	apodemus	Apodemus_sylvaticus	muroids	12.1788	828	43
781	25509	25544	api_france_mondoloni	79410	2017	1	Male	3	Tetrapoda	Mammalia	Rodentia	Myomorpha	Muridae	apodemus	Apodemus_sylvaticus	muroids	12.1788	828	43
782	25851	25886	api_france_mondoloni	79410	2017	2	Male	3	Tetrapoda	Mammalia	Rodentia	Myomorpha	Muridae	apodemus	Apodemus_sylvaticus	muroids	12.1788	828	43
783	25931	25966	api_france_mondoloni	79410	2017	2	Male	3	Tetrapoda	Mammalia	Rodentia	Myomorpha	Muridae	apodemus	Apodemus_sylvaticus	muroids	12.1788	828	43
784	25933	25968	api_france_mondoloni	79410	2017	2	Male	3	Tetrapoda	Mammalia	Rodentia	Myomorpha	Muridae	apodemus	Apodemus_sylvaticus	muroids	12.1788	828	43
785	26385	26420	api_france_mondoloni	79410	2017	3	Male	3	Tetrapoda	Mammalia	Rodentia	Myomorpha	Muridae	apodemus	Apodemus_sylvaticus	muroids	12.1788	828	43
786	26394	26429	api_france_mondoloni	79410	2017	4	Male	3	Tetrapoda	Mammalia	Rodentia	Myomorpha	Muridae	apodemus	Apodemus_sylvaticus	muroids	12.1788	828	43
787	27874	27909	api_france_mondoloni	79410	2017	6	Male	3	Tetrapoda	Mammalia	Rodentia	Myomorpha	Muridae	apodemus	Apodemus_sylvaticus	muroids	12.1788	828	43
788	28140	28175	api_france_mondoloni	79410	2017	6	Male	3	Tetrapoda	Mammalia	Rodentia	Myomorpha	Muridae	apodemus	Apodemus_sylvaticus	muroids	12.1788	828	43
789	34896	34931	api_france_mondoloni	79410	2019	3	Male	5	Tetrapoda	Mammalia	Rodentia	Myomorpha	Muridae	apodemus	Apodemus_sylvaticus	muroids	12.1788	828	43
790	34928	34963	api_france_mondoloni	79410	2019	3	Male	5	Tetrapoda	Mammalia	Rodentia	Myomorpha	Muridae	apodemus	Apodemus_sylvaticus	muroids	12.1788	828	43
791	34929	34964	api_france_mondoloni	79410	2019	3	Male	5	Tetrapoda	Mammalia	Rodentia	Myomorpha	Muridae	apodemus	Apodemus_sylvaticus	muroids	12.1788	828	43
792	35040	35075	api_france_mondoloni	79410	2019	4	Male	5	Tetrapoda	Mammalia	Rodentia	Myomorpha	Muridae	apodemus	Apodemus_sylvaticus	muroids	12.1788	828	43
793	35184	35219	api_france_mondoloni	79410	2019	4	Male	5	Tetrapoda	Mammalia	Rodentia	Myomorpha	Muridae	apodemus	Apodemus_sylvaticus	muroids	12.1788	828	43
794	36990	37047	api_france_mondoloni	79410	2019	10	Male	5	Tetrapoda	Mammalia	Rodentia	Myomorpha	Muridae	apodemus	Apodemus_sylvaticus	muroids	12.1788	828	43
795	36991	37048	api_france_mondoloni	79410	2019	10	Male	5	Tetrapoda	Mammalia	Rodentia	Myomorpha	Muridae	apodemus	Apodemus_sylvaticus	muroids	12.1788	828	43
796	36992	37049	api_france_mondoloni	79410	2019	10	Male	5	Tetrapoda	Mammalia	Rodentia	Myomorpha	Muridae	apodemus	Apodemus_sylvaticus	muroids	12.1788	828	43
797	36993	37050	api_france_mondoloni	79410	2019	10	Male	5	Tetrapoda	Mammalia	Rodentia	Myomorpha	Muridae	apodemus	Apodemus_sylvaticus	muroids	12.1788	828	43
798	37209	37266	api_france_mondoloni	79410	2019	10	Male	5	Tetrapoda	Mammalia	Rodentia	Myomorpha	Muridae	apodemus	Apodemus_sylvaticus	muroids	12.1788	828	43
799	37431	37488	api_france_mondoloni	79410	2019	11	Male	5	Tetrapoda	Mammalia	Rodentia	Myomorpha	Muridae	apodemus	Apodemus_sylvaticus	muroids	12.1788	828	43
800	38104	MONDOLONI_23_01_20_28_04_20	api_france_mondoloni	79410	2020	1	Male	6	Tetrapoda	Mammalia	Rodentia	Myomorpha	Muridae	apodemus	Apodemus_sylvaticus	muroids	12.1788	828	43
801	24549	24584	api_france_mondoloni	79410	2016	12	Male	2	Tetrapoda	Mammalia	Eulipotyphla	Soricidae	Soricidae	Soricidae_gen_sp	Soricidae_gen_sp	soricids	12.1788	828	43
802	15429	15464	api_france_mondoloni	79410	2016	5	Male	2	Tetrapoda	Mammalia	Eulipotyphla	Soricidae	Soricidae	Soricidae_gen_sp	Soricidae_gen_sp	soricids	12.1788	828	43
803	17083	17118	api_france_mondoloni	79410	2016	6	Male	2	Tetrapoda	Mammalia	Eulipotyphla	Soricidae	Soricidae	Soricidae_gen_sp	Soricidae_gen_sp	soricids	12.1788	828	43
804	25780	25815	api_france_mondoloni	79410	2017	2	Male	3	Tetrapoda	Mammalia	Eulipotyphla	Soricidae	Soricidae	Soricidae_gen_sp	Soricidae_gen_sp	soricids	12.1788	828	43
805	26932	26967	api_france_mondoloni	79410	2017	4	Male	3	Tetrapoda	Mammalia	Eulipotyphla	Soricidae	Soricidae	Soricidae_gen_sp	Soricidae_gen_sp	soricids	12.1788	828	43
806	17174	17209	api_france_mondoloni	79410	2016	6	Male	2	Tetrapoda	Mammalia	Rodentia	Myomorpha	Cricetidae	Cricetidae_gen_sp	Cricetidae_gen_sp	cricetids	12.1788	828	43
807	20051	20086	api_france_mondoloni	79410	2016	7	Male	2	Tetrapoda	Mammalia	Rodentia	Myomorpha	Cricetidae	Cricetidae_gen_sp	Cricetidae_gen_sp	cricetids	12.1788	828	43
808	20052	20087	api_france_mondoloni	79410	2016	7	Male	2	Tetrapoda	Mammalia	Rodentia	Myomorpha	Cricetidae	Cricetidae_gen_sp	Cricetidae_gen_sp	cricetids	12.1788	828	43
809	27663	27698	api_france_mondoloni	79410	2017	5	Male	3	Tetrapoda	Mammalia	Rodentia	Myomorpha	Cricetidae	Cricetidae_gen_sp	Cricetidae_gen_sp	cricetids	12.1788	828	43
810	27722	27757	api_france_mondoloni	79410	2017	5	Male	3	Tetrapoda	Mammalia	Rodentia	Myomorpha	Cricetidae	Cricetidae_gen_sp	Cricetidae_gen_sp	cricetids	12.1788	828	43
811	28329	28364	api_france_mondoloni	79410	2017	6	Male	3	Tetrapoda	Mammalia	Rodentia	Myomorpha	Cricetidae	Cricetidae_gen_sp	Cricetidae_gen_sp	cricetids	12.1788	828	43
812	12663	12698	api_france_mondoloni	79410	2016	4	Male	2	Tetrapoda	Mammalia	Rodentia	Myomorpha	Muroidea_fam_gen_sp	Muroidea_fam_gen_sp	Muroidea_fam_gen_sp	muroids	12.1788	828	43
813	17893	17928	api_france_mondoloni	79410	2016	6	Male	2	Tetrapoda	Mammalia	Rodentia	Myomorpha	Muroidea_fam_gen_sp	Muroidea_fam_gen_sp	Muroidea_fam_gen_sp	muroids	12.1788	828	43
814	36144	36179	api_france_mondoloni	79410	2019	7	Male	5	Tetrapoda	Mammalia	Rodentia	Myomorpha	Muridae	rattus	Rattus_norvegicus	muroids	12.1788	828	43
815	35645	35680	api_france_mondoloni	79410	2019	6	Male	5	Tetrapoda	Mammalia	Rodentia	Myomorpha	Muridae	rattus	Rattus_norvegicus	muroids	12.1788	828	43
816	26911	26946	api_france_mondoloni	79410	2017	4	Male	3	Tetrapoda	Mammalia	Rodentia	Myomorpha	Muridae	rattus	Rattus_norvegicus	muroids	12.1788	828	43
817	17501	17536	api_france_mondoloni	79410	2016	6	Male	2	Tetrapoda	Mammalia	Rodentia	Myomorpha	Muridae	mus	Mus_musculus	muroids	12.1788	828	43
818	17892	17927	api_france_mondoloni	79410	2016	6	Male	2	Tetrapoda	Mammalia	Rodentia	Myomorpha	Muridae	mus	Mus_musculus	muroids	12.1788	828	43
819	18214	18249	api_france_mondoloni	79410	2016	6	Male	2	Tetrapoda	Mammalia	Rodentia	Myomorpha	Muridae	mus	Mus_musculus	muroids	12.1788	828	43
820	23573	23608	api_france_mondoloni	79410	2016	10	Male	2	Tetrapoda	Mammalia	Eulipotyphla	Talpidae	Talpidae	talpa	Talpa_sp	other_mammals	12.1788	828	43
821	23574	23609	api_france_mondoloni	79410	2016	10	Male	2	Tetrapoda	Mammalia	Eulipotyphla	Talpidae	Talpidae	talpa	Talpa_sp	other_mammals	12.1788	828	43
822	22010	22045	api_france_mondoloni	79410	2016	8	Male	2	Tetrapoda	Mammalia	Eulipotyphla	Talpidae	Talpidae	talpa	Talpa_sp	other_mammals	12.1788	828	43
823	6721	6748	aramis_ariane_castel	77163	2015	10	Male	8	Tetrapoda	Aves	Passeriformes	Passeri	Phylloscopidae	phylloscopus	Phylloscopus_collybita	passeriforms	10.2466	636	53
824	6723	6750	aramis_ariane_castel	77163	2015	10	Male	8	Tetrapoda	Aves	Passeriformes	Passeri	Phylloscopidae	phylloscopus	Phylloscopus_collybita	passeriforms	10.2466	636	53
825	10316	10351	aramis_ariane_castel	77163	2016	1	Male	9	Tetrapoda	Mammalia	Rodentia	Myomorpha	Muridae	apodemus	Apodemus_sp	muroids	10.2466	636	53
826	9105	9132	aramis_ariane_castel	77163	2015	12	Male	8	Tetrapoda	Mammalia	Rodentia	Myomorpha	Cricetidae	Cricetidae_gen_sp	Cricetidae_gen_sp	cricetids	10.2466	636	53
827	3737	3759	aramis_marie_coviaux	51200	2015	9	Male	1	Annelida	Clitellata	Crassiclitellata	Crassiclitellata	Lumbricidae	Lumbricidae_gen_sp	Lumbricidae_gen_sp	clitellata	10.3715	610	84
828	3828	3850	aramis_marie_coviaux	51200	2015	9	Male	1	Annelida	Clitellata	Crassiclitellata	Crassiclitellata	Lumbricidae	Lumbricidae_gen_sp	Lumbricidae_gen_sp	clitellata	10.3715	610	84
829	4334	4356	aramis_marie_coviaux	51200	2015	9	Male	1	Annelida	Clitellata	Crassiclitellata	Crassiclitellata	Lumbricidae	Lumbricidae_gen_sp	Lumbricidae_gen_sp	clitellata	10.3715	610	84
830	7192	7219	aramis_marie_coviaux	51200	2015	10	Male	1	Annelida	Clitellata	Crassiclitellata	Crassiclitellata	Lumbricidae	Lumbricidae_gen_sp	Lumbricidae_gen_sp	clitellata	10.3715	610	84
831	9789	9816	aramis_marie_coviaux	51200	2015	12	Male	1	Annelida	Clitellata	Crassiclitellata	Crassiclitellata	Lumbricidae	Lumbricidae_gen_sp	Lumbricidae_gen_sp	clitellata	10.3715	610	84
832	9790	9817	aramis_marie_coviaux	51200	2016	1	Male	2	Tetrapoda	Mammalia	Rodentia	Myomorpha	Muroidea_fam_gen_sp	Muroidea_fam_gen_sp	Muroidea_fam_gen_sp	muroids	10.3715	610	84
833	3411	3433	arcenciel_charlotte_tronchet	16260	2015	9	Femelle	0	Tetrapoda	Mammalia	Rodentia	Myomorpha	Cricetidae	Cricetidae_gen_sp	Cricetidae_gen_sp	cricetids	12.0452	831	40
834	22861	22896	arcenciel_lak_malvina_rognant	31560	2016	9	Male	4	Tetrapoda	Aves	Passeriformes	Passeri_fam_gen_sp	Passeri_fam_gen_sp	Passeri_fam_gen_sp	Passeri_fam_gen_sp	passeriforms	12.6122	764	37
835	22860	22895	arcenciel_lak_malvina_rognant	31560	2016	9	Male	4	Tetrapoda	Aves	Passeriformes	Passeri	Muscicapidae	phoenicurus	Phoenicurus_ochruros	passeriforms	12.6122	764	37
836	3146	3168	arcenciel_lak_malvina_rognant	31560	2015	9	Male	3	Tetrapoda	Mammalia	Lagomorpha	Leporidae	Leporidae	oryctolagus	Oryctolagus_cuniculus	other_mammals	12.6122	764	37
837	4262	4284	arcenciel_lak_malvina_rognant	31560	2015	9	Male	3	Tetrapoda	Mammalia	Lagomorpha	Leporidae	Leporidae	oryctolagus	Oryctolagus_cuniculus	other_mammals	12.6122	764	37
838	4261	4283	arcenciel_lak_malvina_rognant	31560	2015	9	Male	3	Tetrapoda	Mammalia	Rodentia	Myomorpha	Muroidea_fam_gen_sp	Muroidea_fam_gen_sp	Muroidea_fam_gen_sp	muroids	12.6122	764	37
839	10443	10478	arcenciel_lak_malvina_rognant	31560	2016	1	Male	4	Tetrapoda	Mammalia	Rodentia	Myomorpha	Muridae	mus	Mus_musculus	muroids	12.6122	764	37
840	22862	22897	arcenciel_lak_malvina_rognant	31560	2016	6	Male	4	Tetrapoda	Mammalia	Rodentia	Myomorpha	Muridae	mus	Mus_musculus	muroids	12.6122	764	37
841	22859	22894	arcenciel_lak_malvina_rognant	31560	2016	9	Male	4	Tetrapoda	Squamata	Squamata	Lacertilia	Lacertidae	podarcis	Podarcis_muralis	lacertilia	12.6122	764	37
842	37893	FAURE_28_04_20_10_05_20	arctyx_chris_faure	1600	2020	4	Male	4	Tetrapoda	Aves	Passeriformes	Passeri	Turdidae	turdus	Turdus_merula	passeriforms	11.4887	822	71
843	37895	FAURE_30_04_20_10_05_20	arctyx_chris_faure	1600	2020	4	Male	4	Tetrapoda	Aves	Passeriformes	Passeri	Turdidae	turdus	Turdus_merula	passeriforms	11.4887	822	71
844	38647	FAURE_13_06_20_20_06_20	arctyx_chris_faure	1600	2020	6	Male	4	Tetrapoda	Aves	Passeriformes	Passeri_fam_gen_sp	Passeri_fam_gen_sp	Passeri_fam_gen_sp	Passeri_fam_gen_sp	passeriforms	11.4887	822	71
845	37885	FAURE_02_05_20_10_05_20	arctyx_chris_faure	1600	2020	5	Male	4	Tetrapoda	Mammalia	Rodentia	Myomorpha	Cricetidae	Cricetidae_gen_sp	Cricetidae_gen_sp	cricetids	11.4887	822	71
846	37887	FAURE_10_05_20_10_05_20	arctyx_chris_faure	1600	2020	5	Male	4	Tetrapoda	Mammalia	Rodentia	Myomorpha	Cricetidae	Cricetidae_gen_sp	Cricetidae_gen_sp	cricetids	11.4887	822	71
847	37886	FAURE_06_02_20_10_05_20	arctyx_chris_faure	1600	2020	2	Male	4	Tetrapoda	Mammalia	Rodentia	Myomorpha	Cricetidae	Cricetidae_gen_sp	Cricetidae_gen_sp	cricetids	11.4887	822	71
848	37894	FAURE_30_03_20_10_05_20	arctyx_chris_faure	1600	2020	3	Male	4	Tetrapoda	Mammalia	Rodentia	Myomorpha	Cricetidae	Cricetidae_gen_sp	Cricetidae_gen_sp	cricetids	11.4887	822	71
849	37884	FAURE_01_02_20_10_05_20	arctyx_chris_faure	1600	2020	2	Male	4	Tetrapoda	Mammalia	Rodentia	Myomorpha	Cricetidae	Cricetidae_gen_sp	Cricetidae_gen_sp	cricetids	11.4887	822	71
850	37891	FAURE_21_02_20_10_05_20	arctyx_chris_faure	1600	2020	2	Male	4	Tetrapoda	Mammalia	Rodentia	Myomorpha	Cricetidae	Cricetidae_gen_sp	Cricetidae_gen_sp	cricetids	11.4887	822	71
851	37892	FAURE_25_01_20_28_04_20	arctyx_chris_faure	1600	2020	1	Male	4	Tetrapoda	Mammalia	Rodentia	Myomorpha	Cricetidae	Cricetidae_gen_sp	Cricetidae_gen_sp	cricetids	11.4887	822	71
852	38711	FAURE_06_06_20_06_06_20	arctyx_chris_faure	1600	2020	6	Male	4	Tetrapoda	Mammalia	Rodentia	Myomorpha	Muroidea_fam_gen_sp	Muroidea_fam_gen_sp	Muroidea_fam_gen_sp	muroids	11.4887	822	71
853	37896	FAURE_31_01_20_28_04_20	arctyx_chris_faure	1600	2020	1	Male	4	Tetrapoda	Mammalia	Rodentia	Myomorpha	Muroidea_fam_gen_sp	Muroidea_fam_gen_sp	Muroidea_fam_gen_sp	muroids	11.4887	822	71
854	38648	FAURE_20_06_20_20_06_20	arctyx_chris_faure	1600	2020	6	Male	4	Tetrapoda	Mammalia	Eulipotyphla	Talpidae	Talpidae	talpa	Talpa_sp	other_mammals	11.4887	822	71
855	37890	FAURE_20_03_20_10_05_20	arctyx_chris_faure	1600	2020	3	Male	4	Tetrapoda	Squamata	Squamata	Lacertilia	Lacertidae	lacerta	Lacerta_sp	lacertilia	11.4887	822	71
856	37888	FAURE_13_04_20_10_05_20	arctyx_chris_faure	1600	2020	4	Male	4	Tetrapoda	Squamata	Squamata	Lacertilia	Lacertidae	lacerta	Lacerta_sp	lacertilia	11.4887	822	71
857	37889	FAURE_17_04_20_10_05_20	arctyx_chris_faure	1600	2020	4	Male	4	Tetrapoda	Squamata	Squamata	Lacertilia	Lacertidae	lacerta	Lacerta_sp	lacertilia	11.4887	822	71
858	22742	22777	ardoise_marie_laure_grisoni	78125	2016	9	Male	11	Tetrapoda	Aves	Passeriformes	Passeri_fam_gen_sp	Passeri_fam_gen_sp	Passeri_fam_gen_sp	Passeri_fam_gen_sp	passeriforms	10.2639	628	40
859	20583	20618	ardoise_marie_laure_grisoni	78125	2016	7	Male	11	Tetrapoda	Aves	Columbiformes	Columbiformes	Columbidae	columba	Columba_palumbus	other_birds	10.2639	628	40
860	23989	24024	ardoise_marie_laure_grisoni	78125	2016	10	Male	11	Tetrapoda	Aves	Passeriformes	Passeri	Muscicapidae	erithacus	Erithacus_rubecula	passeriforms	10.2639	628	40
861	24347	24382	ardoise_marie_laure_grisoni	78125	2016	11	Male	11	Tetrapoda	Aves	Passeriformes	Passeri	Muscicapidae	erithacus	Erithacus_rubecula	passeriforms	10.2639	628	40
862	20584	20619	ardoise_marie_laure_grisoni	78125	2016	7	Male	11	Tetrapoda	Mammalia	Rodentia	Myomorpha	Muridae	apodemus	Apodemus_sp	muroids	10.2639	628	40
863	24954	24989	argan_des_petits_cailloux_caroline_andre	21000	2016	8	Male	1	Arthropoda	Hexapoda	Odonata	Odonata_fan_gen_sp	Odonata_fan_gen_sp	Odonata_fan_gen_sp	Odonata_fan_gen_sp	hexapods	10.3199	757	40
864	24953	24988	argan_des_petits_cailloux_caroline_andre	21000	2016	8	Male	1	Tetrapoda	Mammalia	Rodentia	Myomorpha	Muridae	mus	Mus_musculus	muroids	10.3199	757	40
865	2779	2801	argus_dominique_imperas	83560	2015	8	Male	2	Tetrapoda	Mammalia	Rodentia	Myomorpha	Muroidea_fam_gen_sp	Muroidea_fam_gen_sp	Muroidea_fam_gen_sp	muroids	12.9269	717	28
866	NA	NA	aria_angelique_becquart	33240	2022	1	Femelle	0	Tetrapoda	Mammalia	Rodentia	Myomorpha	Muroidea_fam_gen_sp	Muroidea_fam_gen_sp	Muroidea_fam_gen_sp	muroids	12.889	901	67
867	15935	15970	aria_johanna_salmont	78700	2016	5	Femelle	1	Tetrapoda	Aves	Passeriformes	Passeri	Paridae	cyanistes	Cyanistes_caeruleus	passeriforms	11.1703	619	93
868	17742	17777	aria_johanna_salmont	78700	2016	6	Femelle	1	Tetrapoda	Aves	Passeriformes	Passeri	Paridae	cyanistes	Cyanistes_caeruleus	passeriforms	11.1703	619	93
869	13678	13713	aria_johanna_salmont	78700	2016	4	Femelle	1	Tetrapoda	Mammalia	Rodentia	Myomorpha	Muridae	apodemus	Apodemus_sp	muroids	11.1703	619	93
870	14099	14134	aria_johanna_salmont	78700	2016	5	Femelle	1	Tetrapoda	Mammalia	Rodentia	Myomorpha	Muridae	apodemus	Apodemus_sp	muroids	11.1703	619	93
871	17004	17039	aria_johanna_salmont	78700	2016	6	Femelle	1	Tetrapoda	Mammalia	Rodentia	Myomorpha	Muridae	apodemus	Apodemus_sp	muroids	11.1703	619	93
872	22394	22429	aria_johanna_salmont	78700	2016	9	Femelle	1	Tetrapoda	Mammalia	Rodentia	Myomorpha	Muridae	apodemus	Apodemus_sp	muroids	11.1703	619	93
873	13673	13708	aria_johanna_salmont	78700	2016	4	Femelle	1	Tetrapoda	Mammalia	Eulipotyphla	Soricidae	Soricidae	Soricidae_gen_sp	Soricidae_gen_sp	soricids	11.1703	619	93
874	13674	13709	aria_johanna_salmont	78700	2016	4	Femelle	1	Tetrapoda	Mammalia	Eulipotyphla	Soricidae	Soricidae	Soricidae_gen_sp	Soricidae_gen_sp	soricids	11.1703	619	93
875	13992	14027	aria_johanna_salmont	78700	2016	4	Femelle	1	Tetrapoda	Mammalia	Eulipotyphla	Soricidae	Soricidae	Soricidae_gen_sp	Soricidae_gen_sp	soricids	11.1703	619	93
876	14377	14412	aria_johanna_salmont	78700	2016	5	Femelle	1	Tetrapoda	Mammalia	Eulipotyphla	Soricidae	Soricidae	Soricidae_gen_sp	Soricidae_gen_sp	soricids	11.1703	619	93
877	15111	15146	aria_johanna_salmont	78700	2016	5	Femelle	1	Tetrapoda	Mammalia	Eulipotyphla	Soricidae	Soricidae	Soricidae_gen_sp	Soricidae_gen_sp	soricids	11.1703	619	93
878	15297	15332	aria_johanna_salmont	78700	2016	5	Femelle	1	Tetrapoda	Mammalia	Eulipotyphla	Soricidae	Soricidae	Soricidae_gen_sp	Soricidae_gen_sp	soricids	11.1703	619	93
879	15691	15726	aria_johanna_salmont	78700	2016	5	Femelle	1	Tetrapoda	Mammalia	Eulipotyphla	Soricidae	Soricidae	Soricidae_gen_sp	Soricidae_gen_sp	soricids	11.1703	619	93
880	15692	15727	aria_johanna_salmont	78700	2016	5	Femelle	1	Tetrapoda	Mammalia	Eulipotyphla	Soricidae	Soricidae	Soricidae_gen_sp	Soricidae_gen_sp	soricids	11.1703	619	93
881	16469	16504	aria_johanna_salmont	78700	2016	4	Femelle	1	Tetrapoda	Mammalia	Eulipotyphla	Soricidae	Soricidae	Soricidae_gen_sp	Soricidae_gen_sp	soricids	11.1703	619	93
882	16880	16915	aria_johanna_salmont	78700	2016	6	Femelle	1	Tetrapoda	Mammalia	Eulipotyphla	Soricidae	Soricidae	Soricidae_gen_sp	Soricidae_gen_sp	soricids	11.1703	619	93
883	17671	17706	aria_johanna_salmont	78700	2016	6	Femelle	1	Tetrapoda	Mammalia	Eulipotyphla	Soricidae	Soricidae	Soricidae_gen_sp	Soricidae_gen_sp	soricids	11.1703	619	93
884	17739	17774	aria_johanna_salmont	78700	2016	6	Femelle	1	Tetrapoda	Mammalia	Eulipotyphla	Soricidae	Soricidae	Soricidae_gen_sp	Soricidae_gen_sp	soricids	11.1703	619	93
885	17889	17924	aria_johanna_salmont	78700	2016	6	Femelle	1	Tetrapoda	Mammalia	Eulipotyphla	Soricidae	Soricidae	Soricidae_gen_sp	Soricidae_gen_sp	soricids	11.1703	619	93
886	7892	7919	arianne_johan_verger	44320	2015	11	Femelle	9	Tetrapoda	Aves	Passeriformes	Passeri	Troglodytidae	troglodytes	Troglodytes_troglodytes	passeriforms	12.259	782	34
887	7895	7922	arianne_johan_verger	44320	2015	11	Femelle	9	Tetrapoda	Aves	Passeriformes	Passeri	Troglodytidae	troglodytes	Troglodytes_troglodytes	passeriforms	12.259	782	34
888	10093	10120	arianne_johan_verger	44320	2016	1	Femelle	11	Tetrapoda	Mammalia	Rodentia	Myomorpha	Cricetidae	microtus	Microtus_arvalis	cricetids	12.259	782	34
889	10104	10131	arianne_johan_verger	44320	2016	1	Femelle	11	Tetrapoda	Mammalia	Rodentia	Myomorpha	Cricetidae	microtus	Microtus_arvalis	cricetids	12.259	782	34
890	23248	23283	arianne_johan_verger	44320	2016	10	Femelle	11	Tetrapoda	Mammalia	Rodentia	Myomorpha	Cricetidae	microtus	Microtus_arvalis	cricetids	12.259	782	34
891	23892	23927	arianne_johan_verger	44320	2016	10	Femelle	11	Tetrapoda	Mammalia	Rodentia	Myomorpha	Cricetidae	microtus	Microtus_arvalis	cricetids	12.259	782	34
892	31033	31068	arianne_johan_verger	44320	2017	12	Femelle	12	Tetrapoda	Mammalia	Rodentia	Myomorpha	Cricetidae	microtus	Microtus_arvalis	cricetids	12.259	782	34
893	31449	31484	arianne_johan_verger	44320	2018	2	Femelle	13	Tetrapoda	Mammalia	Rodentia	Myomorpha	Cricetidae	microtus	Microtus_arvalis	cricetids	12.259	782	34
894	11318	11353	arianne_johan_verger	44320	2016	3	Femelle	11	Tetrapoda	Mammalia	Rodentia	Myomorpha	Cricetidae	clethrionomys	Clethrionomys_glareolus	cricetids	12.259	782	34
895	23347	23382	arianne_johan_verger	44320	2016	10	Femelle	11	Tetrapoda	Mammalia	Rodentia	Myomorpha	Cricetidae	clethrionomys	Clethrionomys_glareolus	cricetids	12.259	782	34
896	23527	23562	arianne_johan_verger	44320	2016	10	Femelle	11	Tetrapoda	Mammalia	Rodentia	Myomorpha	Cricetidae	clethrionomys	Clethrionomys_glareolus	cricetids	12.259	782	34
897	23112	23147	arianne_johan_verger	44320	2016	9	Femelle	11	Tetrapoda	Mammalia	Rodentia	Myomorpha	Muridae	apodemus	Apodemus_sylvaticus	muroids	12.259	782	34
898	23247	23282	arianne_johan_verger	44320	2016	9	Femelle	11	Tetrapoda	Mammalia	Rodentia	Myomorpha	Muridae	apodemus	Apodemus_sylvaticus	muroids	12.259	782	34
899	31292	31327	arianne_johan_verger	44320	2018	1	Femelle	13	Tetrapoda	Mammalia	Rodentia	Myomorpha	Muridae	apodemus	Apodemus_sylvaticus	muroids	12.259	782	34
900	31794	31829	arianne_johan_verger	44320	2018	4	Femelle	13	Tetrapoda	Mammalia	Rodentia	Myomorpha	Muridae	apodemus	Apodemus_sylvaticus	muroids	12.259	782	34
901	32684	32719	arianne_johan_verger	44320	2018	5	Femelle	13	Tetrapoda	Mammalia	Rodentia	Myomorpha	Muridae	apodemus	Apodemus_sylvaticus	muroids	12.259	782	34
902	33921	33956	arianne_johan_verger	44320	2018	10	Femelle	13	Tetrapoda	Mammalia	Rodentia	Myomorpha	Muridae	apodemus	Apodemus_sylvaticus	muroids	12.259	782	34
903	7894	7921	arianne_johan_verger	44320	2015	11	Femelle	9	Tetrapoda	Mammalia	Rodentia	Myomorpha	Cricetidae	Cricetidae_gen_sp	Cricetidae_gen_sp	cricetids	12.259	782	34
904	12057	12092	arianne_johan_verger	44320	2016	4	Femelle	11	Tetrapoda	Mammalia	Rodentia	Myomorpha	Cricetidae	Cricetidae_gen_sp	Cricetidae_gen_sp	cricetids	12.259	782	34
905	12394	12429	arianne_johan_verger	44320	2016	4	Femelle	11	Tetrapoda	Mammalia	Rodentia	Myomorpha	Cricetidae	Cricetidae_gen_sp	Cricetidae_gen_sp	cricetids	12.259	782	34
906	31799	31834	arianne_johan_verger	44320	2018	4	Femelle	13	Tetrapoda	Mammalia	Rodentia	Myomorpha	Cricetidae	Cricetidae_gen_sp	Cricetidae_gen_sp	cricetids	12.259	782	34
907	16767	16802	arianne_johan_verger	44320	2016	6	Femelle	11	Tetrapoda	Mammalia	Rodentia	Myomorpha	Muridae	rattus	Rattus_norvegicus	muroids	12.259	782	34
908	23568	23603	arianne_johan_verger	44320	2016	10	Femelle	11	Tetrapoda	Mammalia	Rodentia	Myomorpha	Muridae	rattus	Rattus_norvegicus	muroids	12.259	782	34
909	13871	13906	arianne_johan_verger	44320	2016	4	Femelle	11	Tetrapoda	Squamata	Squamata	Serpentes	Natricidae	natrix	Natrix_helvetica	other_squamata	12.259	782	34
910	12657	12692	arianne_johan_verger	44320	2016	4	Femelle	11	Tetrapoda	Squamata	Squamata	Lacertilia	Lacertidae	lacerta	Lacerta_bilineata	lacertilia	12.259	782	34
911	15168	15203	arianne_johan_verger	44320	2016	5	Femelle	11	Tetrapoda	Squamata	Squamata	Lacertilia	Lacertidae	lacerta	Lacerta_bilineata	lacertilia	12.259	782	34
912	26017	26052	arianne_johan_verger	44320	2017	3	Femelle	12	Tetrapoda	Squamata	Squamata	Lacertilia	Lacertidae	lacerta	Lacerta_bilineata	lacertilia	12.259	782	34
913	15169	15204	arianne_johan_verger	44320	2016	5	Femelle	11	Tetrapoda	Squamata	Squamata	Lacertilia	Lacertidae	podarcis	Podarcis_muralis	lacertilia	12.259	782	34
914	26007	26042	arianne_johan_verger	44320	2017	3	Femelle	12	Tetrapoda	Squamata	Squamata	Lacertilia	Lacertidae	podarcis	Podarcis_muralis	lacertilia	12.259	782	34
915	NA	NA	ariel_lucie_marchand	45130	2021	4	Femelle	0	Tetrapoda	Aves	Aves_ord_fam_gen_sp	Aves_ord_fam_gen_sp	Aves_ord_fam_gen_sp	Aves_ord_fam_gen_sp	Aves_ord_fam_gen_sp	other_birds	11.1952	634	67
916	NA	NA	ariel_lucie_marchand	45130	2021	3	Femelle	0	Tetrapoda	Aves	Aves_ord_fam_gen_sp	Aves_ord_fam_gen_sp	Aves_ord_fam_gen_sp	Aves_ord_fam_gen_sp	Aves_ord_fam_gen_sp	other_birds	11.1952	634	67
917	NA	NA	ariel_lucie_marchand	45130	2021	9	Femelle	0	Tetrapoda	Mammalia	Rodentia	Myomorpha	Muroidea_fam_gen_sp	Muroidea_fam_gen_sp	Muroidea_fam_gen_sp	muroids	11.1952	634	67
918	30243	30278	aristote_catherine_chubilleau	86000	2017	10	Male	2	Tetrapoda	Mammalia	Eulipotyphla	Soricidae	Soricidae	Soricidae_gen_sp	Soricidae_gen_sp	soricids	11.4392	691	87
919	30329	30364	aristote_catherine_chubilleau	86000	2017	10	Male	2	Tetrapoda	Mammalia	Eulipotyphla	Soricidae	Soricidae	Soricidae_gen_sp	Soricidae_gen_sp	soricids	11.4392	691	87
920	28796	28831	arsene_alberto_cerati	29280	2017	7	Male	9	Tetrapoda	Aves	Passeriformes	Passeri	Prunellidae	prunella	Prunella_modularis	passeriforms	11.4224	1097	62
921	1982	2004	arsene_alberto_cerati	29280	2015	8	Male	7	Tetrapoda	Aves	Passeriformes	Passeri	Prunellidae	prunella	Prunella_modularis	passeriforms	11.4224	1097	62
922	33045	33080	arsene_alberto_cerati	29280	2018	7	Male	10	Tetrapoda	Aves	Passeriformes	Passeri	Paridae	cyanistes	Cyanistes_caeruleus	passeriforms	11.4224	1097	62
923	28664	28699	arsene_alberto_cerati	29280	2017	7	Male	9	Tetrapoda	Aves	Columbiformes	Columbiformes	Columbidae	columba	Columba_sp	other_birds	11.4224	1097	62
924	17687	17722	arsene_gilbert_lenglet	46500	2016	6	Male	1	Tetrapoda	Mammalia	Eulipotyphla	Soricidae	Soricidae	Soricidae_gen_sp	Soricidae_gen_sp	soricids	11.7908	845	51
925	38503	Nique_04_08_20_13_08_20	arsene_nique_nique	69150	2020	8	Male	2	Arthropoda	Arachnida	Araneae	Araneae_gen_sp	Araneae_gen_sp	Araneae_gen_sp	Araneae_gen_sp	arachnids	11.803	850	71
926	38504	Nique_12_08_20_13_08_20	arsene_nique_nique	69150	2020	8	Male	2	Tetrapoda	Aves	Passeriformes	Passeri	Corvidae	corvus	Corvus_corone	passeriforms	11.803	850	71
927	38506	Nique_13_08_20_13_08_20	arsene_nique_nique	69150	2020	8	Male	2	Tetrapoda	Aves	Passeriformes	Passeri	Corvidae	corvus	Corvus_corone	passeriforms	11.803	850	71
928	38505	Nique_25_07_20_13_08_20	arsene_nique_nique	69150	2020	7	Male	2	Tetrapoda	Aves	Columbiformes	Columbiformes	Columbidae	columba	Columba_livia	other_birds	11.803	850	71
929	20643	20678	artemis_angelique_belleville	38390	2016	7	Femelle	2	Tetrapoda	Aves	Passeriformes	Passeri	Passeridae	passer	Passer_domesticus	passeriforms	10.738	1052	17
930	3385	3407	artemis_angelique_belleville	38390	2015	9	Femelle	1	Tetrapoda	Aves	Passeriformes	Passeri	Muscicapidae	erithacus	Erithacus_rubecula	passeriforms	10.738	1052	17
931	20644	20679	artemis_angelique_belleville	38390	2016	7	Femelle	2	Tetrapoda	Aves	Columbiformes	Columbiformes	Columbidae	streptopelia	Streptopelia_decaocto	other_birds	10.738	1052	17
932	2436	2458	artemis_angelique_belleville	38390	2015	8	Femelle	1	Arthropoda	Hexapoda	Odonata	Odonata_fan_gen_sp	Odonata_fan_gen_sp	Odonata_fan_gen_sp	Odonata_fan_gen_sp	hexapods	10.738	1052	17
933	20646	20681	artemis_angelique_belleville	38390	2016	7	Femelle	2	Tetrapoda	Mammalia	Rodentia	Myomorpha	Cricetidae	arvicola	Arvicola_sp	cricetids	10.738	1052	17
934	20647	20682	artemis_angelique_belleville	38390	2016	7	Femelle	2	Tetrapoda	Mammalia	Rodentia	Myomorpha	Cricetidae	arvicola	Arvicola_sp	cricetids	10.738	1052	17
935	17839	17874	artemis_angelique_belleville	38390	2016	6	Femelle	2	Tetrapoda	Mammalia	Rodentia	Myomorpha	Cricetidae	arvicola	Arvicola_sp	cricetids	10.738	1052	17
936	12772	12807	artemis_angelique_belleville	38390	2016	4	Femelle	2	Tetrapoda	Mammalia	Rodentia	Myomorpha	Muridae	apodemus	Apodemus_sp	muroids	10.738	1052	17
937	11516	11551	artemis_angelique_belleville	38390	2016	3	Femelle	2	Tetrapoda	Mammalia	Rodentia	Myomorpha	Muridae	apodemus	Apodemus_sp	muroids	10.738	1052	17
938	6556	6578	artemis_angelique_belleville	38390	2015	10	Femelle	1	Tetrapoda	Mammalia	Rodentia	Myomorpha	Muridae	apodemus	Apodemus_sp	muroids	10.738	1052	17
939	1188	1210	artemis_angelique_belleville	38390	2015	8	Femelle	1	Tetrapoda	Mammalia	Eulipotyphla	Soricidae	Soricidae	Soricidae_gen_sp	Soricidae_gen_sp	soricids	10.738	1052	17
940	1343	1365	artemis_angelique_belleville	38390	2015	8	Femelle	1	Tetrapoda	Mammalia	Eulipotyphla	Soricidae	Soricidae	Soricidae_gen_sp	Soricidae_gen_sp	soricids	10.738	1052	17
941	5248	5270	artemis_angelique_belleville	38390	2015	10	Femelle	1	Tetrapoda	Mammalia	Eulipotyphla	Soricidae	Soricidae	Soricidae_gen_sp	Soricidae_gen_sp	soricids	10.738	1052	17
942	2185	2207	artemis_angelique_belleville	38390	2015	8	Femelle	1	Tetrapoda	Mammalia	Eulipotyphla	Soricidae	Soricidae	Soricidae_gen_sp	Soricidae_gen_sp	soricids	10.738	1052	17
943	1606	1628	artemis_angelique_belleville	38390	2015	8	Femelle	1	Tetrapoda	Mammalia	Eulipotyphla	Soricidae	Soricidae	Soricidae_gen_sp	Soricidae_gen_sp	soricids	10.738	1052	17
944	5704	5726	artemis_angelique_belleville	38390	2015	10	Femelle	1	Tetrapoda	Mammalia	Eulipotyphla	Soricidae	Soricidae	Soricidae_gen_sp	Soricidae_gen_sp	soricids	10.738	1052	17
945	5290	5312	artemis_angelique_belleville	38390	2015	10	Femelle	1	Tetrapoda	Mammalia	Eulipotyphla	Soricidae	Soricidae	Soricidae_gen_sp	Soricidae_gen_sp	soricids	10.738	1052	17
946	13278	13313	artemis_angelique_belleville	38390	2016	4	Femelle	2	Tetrapoda	Mammalia	Rodentia	Myomorpha	Cricetidae	Cricetidae_gen_sp	Cricetidae_gen_sp	cricetids	10.738	1052	17
947	1230	1252	artemis_angelique_belleville	38390	2015	8	Femelle	1	Tetrapoda	Mammalia	Rodentia	Myomorpha	Cricetidae	Cricetidae_gen_sp	Cricetidae_gen_sp	cricetids	10.738	1052	17
948	5706	5728	artemis_angelique_belleville	38390	2015	10	Femelle	1	Tetrapoda	Mammalia	Rodentia	Myomorpha	Cricetidae	Cricetidae_gen_sp	Cricetidae_gen_sp	cricetids	10.738	1052	17
949	17837	17872	artemis_angelique_belleville	38390	2016	6	Femelle	2	Tetrapoda	Mammalia	Rodentia	Myomorpha	Cricetidae	Cricetidae_gen_sp	Cricetidae_gen_sp	cricetids	10.738	1052	17
950	20645	20680	artemis_angelique_belleville	38390	2016	7	Femelle	2	Tetrapoda	Mammalia	Rodentia	Myomorpha	Cricetidae	Cricetidae_gen_sp	Cricetidae_gen_sp	cricetids	10.738	1052	17
951	2077	2099	artemis_angelique_belleville	38390	2015	8	Femelle	1	Tetrapoda	Squamata	Squamata	Serpentes	Natricidae	natrix	Natrix_helvetica	other_squamata	10.738	1052	17
952	20648	20683	artemis_angelique_belleville	38390	2016	7	Femelle	2	Tetrapoda	Squamata	Squamata	Lacertilia	Lacertidae	lacerta	Lacerta_bilineata	lacertilia	10.738	1052	17
953	17836	17871	artemis_angelique_belleville	38390	2016	6	Femelle	2	Tetrapoda	Squamata	Squamata	Lacertilia	Lacertidae	podarcis	Podarcis_muralis	lacertilia	10.738	1052	17
954	12730	12765	artemis_angelique_belleville	38390	2016	4	Femelle	2	Tetrapoda	Squamata	Squamata	Lacertilia	Lacertidae	podarcis	Podarcis_muralis	lacertilia	10.738	1052	17
955	5291	5313	artemis_angelique_belleville	38390	2015	10	Femelle	1	Tetrapoda	Squamata	Squamata	Lacertilia	Lacertidae	podarcis	Podarcis_muralis	lacertilia	10.738	1052	17
956	12404	12439	artemis_angelique_belleville	38390	2016	4	Femelle	2	Tetrapoda	Squamata	Squamata	Lacertilia	Lacertidae	podarcis	Podarcis_muralis	lacertilia	10.738	1052	17
957	2434	2456	artemis_angelique_belleville	38390	2015	8	Femelle	1	Tetrapoda	Squamata	Squamata	Lacertilia	Lacertidae	zootoca	Zootoca_vivipara	lacertilia	10.738	1052	17
958	2435	2457	artemis_angelique_belleville	38390	2015	8	Femelle	1	Tetrapoda	Squamata	Squamata	Lacertilia	Lacertidae	zootoca	Zootoca_vivipara	lacertilia	10.738	1052	17
959	1525	1547	artemis_angelique_belleville	38390	2015	8	Femelle	1	Tetrapoda	Squamata	Squamata	Lacertilia	Lacertidae	zootoca	Zootoca_vivipara	lacertilia	10.738	1052	17
960	37937	guilpin_10_05_20_26_05_20	artemis_cecilia_guilpin	46340	2020	5	Femelle	2	Tetrapoda	Aves	Passeriformes	Passeri	Emberizidae	emberiza	Emberiza_cirlus	passeriforms	12.343	880	39
961	37938	guilpin_26_05_20_26_05_20	artemis_cecilia_guilpin	46340	2020	5	Femelle	2	Tetrapoda	Mammalia	Rodentia	Myomorpha	Muroidea_fam_gen_sp	Muroidea_fam_gen_sp	Muroidea_fam_gen_sp	muroids	12.343	880	39
962	NA	NA	artemis_margaux_julien	34090	2021	9	Femelle	0	Arthropoda	Hexapoda	Diptera	Diptera_fam_gen_sp	Diptera_fam_gen_sp	Diptera_fam_gen_sp	Diptera_fam_gen_sp	hexapods	14.7654	653	78
963	2781	2803	arthur_caroline_lohou	29460	2015	8	Male	9	Tetrapoda	Mammalia	Rodentia	Myomorpha	Cricetidae	Cricetidae_gen_sp	Cricetidae_gen_sp	cricetids	11.4445	1061	26
964	12	34	arthur_marcel_marcel	61000	2015	7	Male	10	Tetrapoda	Mammalia	Rodentia	Myomorpha	Muroidea_fam_gen_sp	Muroidea_fam_gen_sp	Muroidea_fam_gen_sp	muroids	10.5644	707	93
965	4598	4620	arun_marie_helene_reich	44100	2015	8	Male	3	Tetrapoda	Aves	Passeriformes	Passeri	Paridae	cyanistes	Cyanistes_caeruleus	passeriforms	11.9763	797	93
966	6625	6652	arun_marie_helene_reich	44100	2015	10	Male	3	Tetrapoda	Aves	Passeriformes	Passeri	Regulidae	regulus	Regulus_sp	passeriforms	11.9763	797	93
967	7055	7082	arun_marie_helene_reich	44100	2015	10	Male	3	Tetrapoda	Aves	Passeriformes	Passeri	Regulidae	regulus	Regulus_sp	passeriforms	11.9763	797	93
968	27256	27291	arvi_camille_rostan	73000	2017	5	Male	3	Tetrapoda	Aves	Passeriformes	Passeri	Turdidae	turdus	Turdus_merula	passeriforms	10.8808	1011	93
969	27257	27292	arvi_camille_rostan	73000	2017	5	Male	3	Tetrapoda	Aves	Passeriformes	Passeri	Turdidae	turdus	Turdus_merula	passeriforms	10.8808	1011	93
970	31733	31768	arvi_camille_rostan	73000	2018	4	Male	4	Tetrapoda	Aves	Passeriformes	Passeri	Fringillidae	carduelis	Carduelis_chloris	passeriforms	10.8808	1011	93
971	32544	32579	arya_tisic_fanny_coutant	67640	2018	5	Femelle	2	Tetrapoda	Mammalia	Eulipotyphla	Soricidae	Soricidae	Soricidae_gen_sp	Soricidae_gen_sp	soricids	10.336	710	73
972	32545	32580	arya_tisic_fanny_coutant	67640	2018	5	Femelle	2	Tetrapoda	Mammalia	Eulipotyphla	Soricidae	Soricidae	Soricidae_gen_sp	Soricidae_gen_sp	soricids	10.336	710	73
973	32546	32581	arya_tisic_fanny_coutant	67640	2018	5	Femelle	2	Tetrapoda	Mammalia	Eulipotyphla	Soricidae	Soricidae	Soricidae_gen_sp	Soricidae_gen_sp	soricids	10.336	710	73
974	32594	32629	arya_tisic_fanny_coutant	67640	2018	5	Femelle	2	Tetrapoda	Mammalia	Eulipotyphla	Soricidae	Soricidae	Soricidae_gen_sp	Soricidae_gen_sp	soricids	10.336	710	73
975	32620	32655	arya_tisic_fanny_coutant	67640	2018	6	Femelle	2	Tetrapoda	Mammalia	Eulipotyphla	Soricidae	Soricidae	Soricidae_gen_sp	Soricidae_gen_sp	soricids	10.336	710	73
976	32642	32677	arya_tisic_fanny_coutant	67640	2018	6	Femelle	2	Tetrapoda	Mammalia	Eulipotyphla	Soricidae	Soricidae	Soricidae_gen_sp	Soricidae_gen_sp	soricids	10.336	710	73
977	32665	32700	arya_tisic_fanny_coutant	67640	2018	6	Femelle	2	Tetrapoda	Mammalia	Eulipotyphla	Soricidae	Soricidae	Soricidae_gen_sp	Soricidae_gen_sp	soricids	10.336	710	73
978	32671	32706	arya_tisic_fanny_coutant	67640	2018	6	Femelle	2	Tetrapoda	Mammalia	Eulipotyphla	Soricidae	Soricidae	Soricidae_gen_sp	Soricidae_gen_sp	soricids	10.336	710	73
979	32621	32656	arya_tisic_fanny_coutant	67640	2018	5	Femelle	2	Tetrapoda	Squamata	Squamata	Lacertilia	Lacertidae	podarcis	Podarcis_muralis	lacertilia	10.336	710	73
980	32666	32701	arya_tisic_fanny_coutant	67640	2018	6	Femelle	2	Tetrapoda	Squamata	Squamata	Lacertilia	Lacertidae	podarcis	Podarcis_muralis	lacertilia	10.336	710	73
981	NA	NA	askatasounaokatarinabellatchitchi_thierry_bernard	37500	2020	11	Male	0	Tetrapoda	Mammalia	Lagomorpha	Leporidae	Leporidae	oryctolagus	Oryctolagus_cuniculus	other_mammals	11.4216	693	40
982	NA	NA	askatassunaokatarrinettabellatchitchi_thierry_bernard	37500	2021	1	Male	0	Tetrapoda	Aves	Passeriformes	Passeri	Muscicapidae	erithacus	Erithacus_rubecula	passeriforms	11.5257	671	78
983	33373	33408	aslan_anne_cecile_couchard	92160	2018	8	Male	5	Tetrapoda	Aves	Passeriformes	Passeri	Turdidae	turdus	Turdus_merula	passeriforms	11.2998	631	93
984	17090	17125	aslan_anne_cecile_couchard	92160	2016	6	Male	3	Tetrapoda	Aves	Passeriformes	Passeri	Turdidae	turdus	Turdus_merula	passeriforms	11.2998	631	93
985	34614	34649	aslan_anne_cecile_couchard	92160	2018	10	Male	5	Tetrapoda	Aves	Passeriformes	Passeri	Passeridae	passer	Passer_domesticus	passeriforms	11.2998	631	93
986	17738	17773	aslan_anne_cecile_couchard	92160	2016	6	Male	3	Tetrapoda	Aves	Passeriformes	Passeri	Passeridae	passer	Passer_domesticus	passeriforms	11.2998	631	93
987	36052	36087	aslan_anne_cecile_couchard	92160	2019	7	Male	6	Tetrapoda	Aves	Passeriformes	Passeri	Passeridae	passer	Passer_domesticus	passeriforms	11.2998	631	93
988	29143	29178	aslan_anne_cecile_couchard	92160	2017	7	Male	4	Tetrapoda	Aves	Passeriformes	Passeri	Passeridae	passer	Passer_domesticus	passeriforms	11.2998	631	93
989	35307	35342	aslan_anne_cecile_couchard	92160	2019	5	Male	6	Tetrapoda	Aves	Passeriformes	Passeri	Passeridae	passer	Passer_domesticus	passeriforms	11.2998	631	93
990	16099	16134	aslan_anne_cecile_couchard	92160	2016	5	Male	3	Tetrapoda	Aves	Passeriformes	Passeri	Passeridae	passer	Passer_domesticus	passeriforms	11.2998	631	93
991	4056	4078	aslan_anne_cecile_couchard	92160	2015	9	Male	2	Tetrapoda	Aves	Aves_ord_fam_gen_sp	Aves_ord_fam_gen_sp	Aves_ord_fam_gen_sp	Aves_ord_fam_gen_sp	Aves_ord_fam_gen_sp	other_birds	11.2998	631	93
992	37539	37596	aslan_anne_cecile_couchard	92160	2019	12	Male	6	Tetrapoda	Aves	Passeriformes	Passeri	Fringillidae	fringilla	Fringilla_coelebs	passeriforms	11.2998	631	93
993	34067	34102	aslan_anne_cecile_couchard	92160	2018	10	Male	5	Tetrapoda	Aves	Passeriformes	Passeri	Fringillidae	fringilla	Fringilla_coelebs	passeriforms	11.2998	631	93
994	12203	12238	aslan_anne_cecile_couchard	92160	2016	4	Male	3	Tetrapoda	Aves	Passeriformes	Passeri	Muscicapidae	erithacus	Erithacus_rubecula	passeriforms	11.2998	631	93
995	32262	32297	aslan_anne_cecile_couchard	92160	2018	5	Male	5	Tetrapoda	Aves	Passeriformes	Passeri	Muscicapidae	phoenicurus	Phoenicurus_ochruros	passeriforms	11.2998	631	93
996	28192	28227	aslan_anne_cecile_couchard	92160	2017	6	Male	4	Tetrapoda	Aves	Passeriformes	Passeri	Muscicapidae	phoenicurus	Phoenicurus_ochruros	passeriforms	11.2998	631	93
997	781	803	aslan_anne_cecile_couchard	92160	2015	7	Male	2	Tetrapoda	Aves	Columbiformes	Columbiformes	Columbidae	streptopelia	Streptopelia_decaocto	other_birds	11.2998	631	93
998	29144	29179	aslan_anne_cecile_couchard	92160	2017	7	Male	4	Tetrapoda	Mammalia	Rodentia	Myomorpha	Muroidea_fam_gen_sp	Muroidea_fam_gen_sp	Muroidea_fam_gen_sp	muroids	11.2998	631	93
999	17716	17751	aslan_anne_cecile_couchard	92160	2016	6	Male	3	Tetrapoda	Mammalia	Rodentia	Myomorpha	Muridae	apodemus	Apodemus_sp	muroids	11.2998	631	93
1000	36053	36088	aslan_anne_cecile_couchard	92160	2019	7	Male	1	Tetrapoda	Mammalia	Rodentia	Myomorpha	Muridae	apodemus	Apodemus_sp	muroids	11.2998	631	93
1001	20719	20754	aslan_anne_cecile_couchard	92160	2016	7	Male	3	Tetrapoda	Mammalia	Rodentia	Myomorpha	Muridae	apodemus	Apodemus_sp	muroids	11.2998	631	93
1002	26264	26299	aslan_anne_cecile_couchard	92160	2017	3	Male	4	Tetrapoda	Mammalia	Rodentia	Myomorpha	Muridae	apodemus	Apodemus_sp	muroids	11.2998	631	93
1003	28452	28487	aslan_anne_cecile_couchard	92160	2017	6	Male	4	Tetrapoda	Mammalia	Rodentia	Myomorpha	Muridae	apodemus	Apodemus_sp	muroids	11.2998	631	93
1004	17089	17124	aslan_anne_cecile_couchard	92160	2016	6	Male	3	Tetrapoda	Mammalia	Rodentia	Myomorpha	Muridae	apodemus	Apodemus_sp	muroids	11.2998	631	93
1005	31539	31574	asmar_marie_pierre_larvor	51100	2018	3	Male	1	Tetrapoda	Aves	Passeriformes	Passeri	Turdidae	turdus	Turdus_merula	passeriforms	10.3164	615	87
1006	31463	31498	asmar_marie_pierre_larvor	51100	2018	2	Male	1	Tetrapoda	Aves	Passeriformes	Passeri	Paridae	parus	Parus_major	passeriforms	10.3164	615	87
1007	32205	32240	asmar_marie_pierre_larvor	51100	2018	4	Male	1	Tetrapoda	Aves	Columbiformes	Columbiformes	Columbidae	columba	Columba_palumbus	other_birds	10.3164	615	87
1008	31872	31907	asmar_marie_pierre_larvor	51100	2018	4	Male	1	Tetrapoda	Mammalia	Lagomorpha	Leporidae	Leporidae	oryctolagus	Oryctolagus_cuniculus	other_mammals	10.3164	615	87
1009	32403	32438	asmar_marie_pierre_larvor	51100	2018	5	Male	1	Tetrapoda	Mammalia	Lagomorpha	Leporidae	Leporidae	oryctolagus	Oryctolagus_cuniculus	other_mammals	10.3164	615	87
1010	32406	32441	asmar_marie_pierre_larvor	51100	2018	5	Male	1	Tetrapoda	Mammalia	Lagomorpha	Leporidae	Leporidae	oryctolagus	Oryctolagus_cuniculus	other_mammals	10.3164	615	87
1011	31253	31288	asmar_marie_pierre_larvor	51100	2018	1	Male	1	Tetrapoda	Mammalia	Rodentia	Myomorpha	Muridae	apodemus	Apodemus_sp	muroids	10.3164	615	87
1012	31367	31402	asmar_marie_pierre_larvor	51100	2018	2	Male	1	Tetrapoda	Mammalia	Rodentia	Myomorpha	Muridae	apodemus	Apodemus_sp	muroids	10.3164	615	87
1013	31462	31497	asmar_marie_pierre_larvor	51100	2018	2	Male	1	Tetrapoda	Mammalia	Rodentia	Myomorpha	Muridae	apodemus	Apodemus_sp	muroids	10.3164	615	87
1014	31494	31529	asmar_marie_pierre_larvor	51100	2018	2	Male	1	Tetrapoda	Mammalia	Rodentia	Myomorpha	Muridae	apodemus	Apodemus_sp	muroids	10.3164	615	87
1015	31495	31530	asmar_marie_pierre_larvor	51100	2018	2	Male	1	Tetrapoda	Mammalia	Rodentia	Myomorpha	Muridae	apodemus	Apodemus_sp	muroids	10.3164	615	87
1016	31536	31571	asmar_marie_pierre_larvor	51100	2018	3	Male	1	Tetrapoda	Mammalia	Rodentia	Myomorpha	Muridae	apodemus	Apodemus_sp	muroids	10.3164	615	87
1017	31537	31572	asmar_marie_pierre_larvor	51100	2018	3	Male	1	Tetrapoda	Mammalia	Rodentia	Myomorpha	Muridae	apodemus	Apodemus_sp	muroids	10.3164	615	87
1018	31871	31906	asmar_marie_pierre_larvor	51100	2018	4	Male	1	Tetrapoda	Mammalia	Rodentia	Myomorpha	Muridae	apodemus	Apodemus_sp	muroids	10.3164	615	87
1019	31873	31908	asmar_marie_pierre_larvor	51100	2018	4	Male	1	Tetrapoda	Mammalia	Rodentia	Myomorpha	Muridae	apodemus	Apodemus_sp	muroids	10.3164	615	87
1020	31927	31962	asmar_marie_pierre_larvor	51100	2018	4	Male	1	Tetrapoda	Mammalia	Rodentia	Myomorpha	Muridae	apodemus	Apodemus_sp	muroids	10.3164	615	87
1021	31928	31963	asmar_marie_pierre_larvor	51100	2018	4	Male	1	Tetrapoda	Mammalia	Rodentia	Myomorpha	Muridae	apodemus	Apodemus_sp	muroids	10.3164	615	87
1022	32056	32091	asmar_marie_pierre_larvor	51100	2018	4	Male	1	Tetrapoda	Mammalia	Rodentia	Myomorpha	Muridae	apodemus	Apodemus_sp	muroids	10.3164	615	87
1023	32203	32238	asmar_marie_pierre_larvor	51100	2018	4	Male	1	Tetrapoda	Mammalia	Rodentia	Myomorpha	Muridae	apodemus	Apodemus_sp	muroids	10.3164	615	87
1024	31268	31303	asmar_marie_pierre_larvor	51100	2018	1	Male	1	Tetrapoda	Mammalia	Rodentia	Myomorpha	Cricetidae	Cricetidae_gen_sp	Cricetidae_gen_sp	cricetids	10.3164	615	87
1025	31269	31304	asmar_marie_pierre_larvor	51100	2018	1	Male	1	Tetrapoda	Mammalia	Rodentia	Myomorpha	Cricetidae	Cricetidae_gen_sp	Cricetidae_gen_sp	cricetids	10.3164	615	87
1026	31274	31309	asmar_marie_pierre_larvor	51100	2018	1	Male	1	Tetrapoda	Mammalia	Rodentia	Myomorpha	Cricetidae	Cricetidae_gen_sp	Cricetidae_gen_sp	cricetids	10.3164	615	87
1027	31275	31310	asmar_marie_pierre_larvor	51100	2018	1	Male	1	Tetrapoda	Mammalia	Rodentia	Myomorpha	Cricetidae	Cricetidae_gen_sp	Cricetidae_gen_sp	cricetids	10.3164	615	87
1028	31276	31311	asmar_marie_pierre_larvor	51100	2018	1	Male	1	Tetrapoda	Mammalia	Rodentia	Myomorpha	Cricetidae	Cricetidae_gen_sp	Cricetidae_gen_sp	cricetids	10.3164	615	87
1029	31311	31346	asmar_marie_pierre_larvor	51100	2018	1	Male	1	Tetrapoda	Mammalia	Rodentia	Myomorpha	Cricetidae	Cricetidae_gen_sp	Cricetidae_gen_sp	cricetids	10.3164	615	87
1030	31312	31347	asmar_marie_pierre_larvor	51100	2018	1	Male	1	Tetrapoda	Mammalia	Rodentia	Myomorpha	Cricetidae	Cricetidae_gen_sp	Cricetidae_gen_sp	cricetids	10.3164	615	87
1031	31320	31355	asmar_marie_pierre_larvor	51100	2018	1	Male	1	Tetrapoda	Mammalia	Rodentia	Myomorpha	Cricetidae	Cricetidae_gen_sp	Cricetidae_gen_sp	cricetids	10.3164	615	87
1032	31321	31356	asmar_marie_pierre_larvor	51100	2018	1	Male	1	Tetrapoda	Mammalia	Rodentia	Myomorpha	Cricetidae	Cricetidae_gen_sp	Cricetidae_gen_sp	cricetids	10.3164	615	87
1033	31322	31357	asmar_marie_pierre_larvor	51100	2018	1	Male	1	Tetrapoda	Mammalia	Rodentia	Myomorpha	Cricetidae	Cricetidae_gen_sp	Cricetidae_gen_sp	cricetids	10.3164	615	87
1034	31323	31358	asmar_marie_pierre_larvor	51100	2018	1	Male	1	Tetrapoda	Mammalia	Rodentia	Myomorpha	Cricetidae	Cricetidae_gen_sp	Cricetidae_gen_sp	cricetids	10.3164	615	87
1035	31344	31379	asmar_marie_pierre_larvor	51100	2018	1	Male	1	Tetrapoda	Mammalia	Rodentia	Myomorpha	Cricetidae	Cricetidae_gen_sp	Cricetidae_gen_sp	cricetids	10.3164	615	87
1036	31345	31380	asmar_marie_pierre_larvor	51100	2018	1	Male	1	Tetrapoda	Mammalia	Rodentia	Myomorpha	Cricetidae	Cricetidae_gen_sp	Cricetidae_gen_sp	cricetids	10.3164	615	87
1037	31346	31381	asmar_marie_pierre_larvor	51100	2018	1	Male	1	Tetrapoda	Mammalia	Rodentia	Myomorpha	Cricetidae	Cricetidae_gen_sp	Cricetidae_gen_sp	cricetids	10.3164	615	87
1038	31365	31400	asmar_marie_pierre_larvor	51100	2018	1	Male	1	Tetrapoda	Mammalia	Rodentia	Myomorpha	Cricetidae	Cricetidae_gen_sp	Cricetidae_gen_sp	cricetids	10.3164	615	87
1039	31366	31401	asmar_marie_pierre_larvor	51100	2018	2	Male	1	Tetrapoda	Mammalia	Rodentia	Myomorpha	Cricetidae	Cricetidae_gen_sp	Cricetidae_gen_sp	cricetids	10.3164	615	87
1040	31368	31403	asmar_marie_pierre_larvor	51100	2018	2	Male	1	Tetrapoda	Mammalia	Rodentia	Myomorpha	Cricetidae	Cricetidae_gen_sp	Cricetidae_gen_sp	cricetids	10.3164	615	87
1041	31369	31404	asmar_marie_pierre_larvor	51100	2018	2	Male	1	Tetrapoda	Mammalia	Rodentia	Myomorpha	Cricetidae	Cricetidae_gen_sp	Cricetidae_gen_sp	cricetids	10.3164	615	87
1042	31370	31405	asmar_marie_pierre_larvor	51100	2018	2	Male	1	Tetrapoda	Mammalia	Rodentia	Myomorpha	Cricetidae	Cricetidae_gen_sp	Cricetidae_gen_sp	cricetids	10.3164	615	87
1043	31374	31409	asmar_marie_pierre_larvor	51100	2018	2	Male	1	Tetrapoda	Mammalia	Rodentia	Myomorpha	Cricetidae	Cricetidae_gen_sp	Cricetidae_gen_sp	cricetids	10.3164	615	87
1044	31382	31417	asmar_marie_pierre_larvor	51100	2018	2	Male	1	Tetrapoda	Mammalia	Rodentia	Myomorpha	Cricetidae	Cricetidae_gen_sp	Cricetidae_gen_sp	cricetids	10.3164	615	87
1045	31425	31460	asmar_marie_pierre_larvor	51100	2018	2	Male	1	Tetrapoda	Mammalia	Rodentia	Myomorpha	Cricetidae	Cricetidae_gen_sp	Cricetidae_gen_sp	cricetids	10.3164	615	87
1046	31426	31461	asmar_marie_pierre_larvor	51100	2018	2	Male	1	Tetrapoda	Mammalia	Rodentia	Myomorpha	Cricetidae	Cricetidae_gen_sp	Cricetidae_gen_sp	cricetids	10.3164	615	87
1047	31427	31462	asmar_marie_pierre_larvor	51100	2018	2	Male	1	Tetrapoda	Mammalia	Rodentia	Myomorpha	Cricetidae	Cricetidae_gen_sp	Cricetidae_gen_sp	cricetids	10.3164	615	87
1048	31461	31496	asmar_marie_pierre_larvor	51100	2018	2	Male	1	Tetrapoda	Mammalia	Rodentia	Myomorpha	Cricetidae	Cricetidae_gen_sp	Cricetidae_gen_sp	cricetids	10.3164	615	87
1049	31535	31570	asmar_marie_pierre_larvor	51100	2018	2	Male	1	Tetrapoda	Mammalia	Rodentia	Myomorpha	Cricetidae	Cricetidae_gen_sp	Cricetidae_gen_sp	cricetids	10.3164	615	87
1050	31960	31995	asmar_marie_pierre_larvor	51100	2018	4	Male	1	Tetrapoda	Mammalia	Rodentia	Myomorpha	Cricetidae	Cricetidae_gen_sp	Cricetidae_gen_sp	cricetids	10.3164	615	87
1051	31986	32021	asmar_marie_pierre_larvor	51100	2018	4	Male	1	Tetrapoda	Mammalia	Rodentia	Myomorpha	Cricetidae	Cricetidae_gen_sp	Cricetidae_gen_sp	cricetids	10.3164	615	87
1052	31987	32022	asmar_marie_pierre_larvor	51100	2018	4	Male	1	Tetrapoda	Mammalia	Rodentia	Myomorpha	Cricetidae	Cricetidae_gen_sp	Cricetidae_gen_sp	cricetids	10.3164	615	87
1053	31988	32023	asmar_marie_pierre_larvor	51100	2018	4	Male	1	Tetrapoda	Mammalia	Rodentia	Myomorpha	Cricetidae	Cricetidae_gen_sp	Cricetidae_gen_sp	cricetids	10.3164	615	87
1054	31989	32024	asmar_marie_pierre_larvor	51100	2018	4	Male	1	Tetrapoda	Mammalia	Rodentia	Myomorpha	Cricetidae	Cricetidae_gen_sp	Cricetidae_gen_sp	cricetids	10.3164	615	87
1055	32057	32092	asmar_marie_pierre_larvor	51100	2018	4	Male	1	Tetrapoda	Mammalia	Rodentia	Myomorpha	Cricetidae	Cricetidae_gen_sp	Cricetidae_gen_sp	cricetids	10.3164	615	87
1056	32058	32093	asmar_marie_pierre_larvor	51100	2018	4	Male	1	Tetrapoda	Mammalia	Rodentia	Myomorpha	Cricetidae	Cricetidae_gen_sp	Cricetidae_gen_sp	cricetids	10.3164	615	87
1057	32059	32094	asmar_marie_pierre_larvor	51100	2018	4	Male	1	Tetrapoda	Mammalia	Rodentia	Myomorpha	Cricetidae	Cricetidae_gen_sp	Cricetidae_gen_sp	cricetids	10.3164	615	87
1058	32060	32095	asmar_marie_pierre_larvor	51100	2018	4	Male	1	Tetrapoda	Mammalia	Rodentia	Myomorpha	Cricetidae	Cricetidae_gen_sp	Cricetidae_gen_sp	cricetids	10.3164	615	87
1059	32204	32239	asmar_marie_pierre_larvor	51100	2018	4	Male	1	Tetrapoda	Mammalia	Rodentia	Myomorpha	Cricetidae	Cricetidae_gen_sp	Cricetidae_gen_sp	cricetids	10.3164	615	87
1060	32206	32241	asmar_marie_pierre_larvor	51100	2018	5	Male	1	Tetrapoda	Mammalia	Rodentia	Myomorpha	Cricetidae	Cricetidae_gen_sp	Cricetidae_gen_sp	cricetids	10.3164	615	87
1061	32207	32242	asmar_marie_pierre_larvor	51100	2018	5	Male	1	Tetrapoda	Mammalia	Rodentia	Myomorpha	Cricetidae	Cricetidae_gen_sp	Cricetidae_gen_sp	cricetids	10.3164	615	87
1062	32404	32439	asmar_marie_pierre_larvor	51100	2018	5	Male	1	Tetrapoda	Mammalia	Rodentia	Myomorpha	Cricetidae	Cricetidae_gen_sp	Cricetidae_gen_sp	cricetids	10.3164	615	87
1063	32405	32440	asmar_marie_pierre_larvor	51100	2018	5	Male	1	Tetrapoda	Mammalia	Rodentia	Myomorpha	Cricetidae	Cricetidae_gen_sp	Cricetidae_gen_sp	cricetids	10.3164	615	87
1064	17541	17576	asmar_ric_desflaches	14210	2016	6	Male	9	Tetrapoda	Aves	Passeriformes	Passeri	Passeridae	passer	Passer_domesticus	passeriforms	10.7994	789	56
1065	13766	13801	asmar_ric_desflaches	14210	2016	4	Male	9	Tetrapoda	Aves	Passeriformes	Passeri	Muscicapidae	phoenicurus	Phoenicurus_ochruros	passeriforms	10.7994	789	56
1066	5371	5393	asmar_ric_desflaches	14210	2015	10	Male	8	Tetrapoda	Aves	Columbiformes	Columbiformes	Columbidae	streptopelia	Streptopelia_decaocto	other_birds	10.7994	789	56
1067	5589	5611	asmar_ric_desflaches	14210	2015	10	Male	8	Tetrapoda	Aves	Passeriformes	Passeri	Troglodytidae	troglodytes	Troglodytes_troglodytes	passeriforms	10.7994	789	56
1068	6353	6375	asmar_ric_desflaches	14210	2015	10	Male	8	Tetrapoda	Aves	Passeriformes	Passeri	Troglodytidae	troglodytes	Troglodytes_troglodytes	passeriforms	10.7994	789	56
1069	15299	15334	asmar_ric_desflaches	14210	2016	5	Male	9	Tetrapoda	Aves	Passeriformes	Passeri	Troglodytidae	troglodytes	Troglodytes_troglodytes	passeriforms	10.7994	789	56
1070	21722	21757	asmar_ric_desflaches	14210	2016	8	Male	9	Tetrapoda	Mammalia	Rodentia	Myomorpha	Cricetidae	microtus	Microtus_arvalis	cricetids	10.9824	765	57
1071	22160	22195	asmar_ric_desflaches	14210	2016	8	Male	9	Tetrapoda	Mammalia	Rodentia	Myomorpha	Cricetidae	microtus	Microtus_arvalis	cricetids	10.9824	765	57
1072	22161	22196	asmar_ric_desflaches	14210	2016	8	Male	9	Tetrapoda	Mammalia	Rodentia	Myomorpha	Cricetidae	microtus	Microtus_arvalis	cricetids	10.9824	765	57
1073	22162	22197	asmar_ric_desflaches	14210	2016	8	Male	9	Tetrapoda	Mammalia	Rodentia	Myomorpha	Cricetidae	microtus	Microtus_arvalis	cricetids	10.9824	765	57
1074	5469	5491	asmar_ric_desflaches	14210	2015	10	Male	8	Tetrapoda	Mammalia	Rodentia	Myomorpha	Cricetidae	microtus	Microtus_arvalis	cricetids	10.7994	789	56
1075	5245	5267	asmar_ric_desflaches	14210	2015	10	Male	8	Tetrapoda	Mammalia	Rodentia	Myomorpha	Cricetidae	microtus	Microtus_arvalis	cricetids	10.7994	789	56
1076	5246	5268	asmar_ric_desflaches	14210	2015	10	Male	8	Tetrapoda	Mammalia	Rodentia	Myomorpha	Cricetidae	microtus	Microtus_arvalis	cricetids	10.7994	789	56
1077	7884	7911	asmar_ric_desflaches	14210	2015	11	Male	8	Tetrapoda	Mammalia	Rodentia	Myomorpha	Cricetidae	microtus	Microtus_arvalis	cricetids	10.7994	789	56
1078	10768	10803	asmar_ric_desflaches	14210	2016	2	Male	9	Tetrapoda	Mammalia	Rodentia	Myomorpha	Cricetidae	microtus	Microtus_arvalis	cricetids	10.7994	789	56
1079	11345	11380	asmar_ric_desflaches	14210	2016	3	Male	9	Tetrapoda	Mammalia	Rodentia	Myomorpha	Cricetidae	microtus	Microtus_arvalis	cricetids	10.7994	789	56
1080	16363	16398	asmar_ric_desflaches	14210	2016	5	Male	9	Tetrapoda	Mammalia	Rodentia	Myomorpha	Cricetidae	microtus	Microtus_arvalis	cricetids	10.7994	789	56
1081	18710	18745	asmar_ric_desflaches	14210	2016	7	Male	9	Tetrapoda	Mammalia	Rodentia	Myomorpha	Cricetidae	microtus	Microtus_arvalis	cricetids	10.7994	789	56
1082	18712	18747	asmar_ric_desflaches	14210	2016	6	Male	9	Tetrapoda	Mammalia	Rodentia	Myomorpha	Cricetidae	arvicola	Arvicola_amphibius	cricetids	10.7994	789	56
1083	5781	5803	asmar_ric_desflaches	14210	2015	10	Male	8	Tetrapoda	Mammalia	Rodentia	Myomorpha	Cricetidae	Cricetidae_gen_sp	Cricetidae_gen_sp	cricetids	10.7994	789	56
1084	11014	11049	asmar_ric_desflaches	14210	2016	3	Male	9	Tetrapoda	Mammalia	Rodentia	Myomorpha	Cricetidae	Cricetidae_gen_sp	Cricetidae_gen_sp	cricetids	10.7994	789	56
1085	11509	11544	asmar_ric_desflaches	14210	2016	3	Male	9	Tetrapoda	Mammalia	Rodentia	Myomorpha	Cricetidae	clethrionomys	Clethrionomys_glareolus	cricetids	10.7994	789	56
1086	22163	22198	asmar_ric_desflaches	14210	2016	9	Male	9	Tetrapoda	Mammalia	Rodentia	Myomorpha	Muridae	apodemus	Apodemus_sp	muroids	10.9824	765	57
1087	22164	22199	asmar_ric_desflaches	14210	2016	9	Male	9	Tetrapoda	Mammalia	Rodentia	Myomorpha	Muridae	apodemus	Apodemus_sp	muroids	10.9824	765	57
1088	9080	9107	asmar_ric_desflaches	14210	2015	12	Male	8	Tetrapoda	Mammalia	Rodentia	Myomorpha	Cricetidae	Cricetidae_gen_sp	Cricetidae_gen_sp	cricetids	10.7994	789	56
1089	15301	15336	asmar_ric_desflaches	14210	2016	5	Male	9	Tetrapoda	Mammalia	Rodentia	Myomorpha	Cricetidae	Cricetidae_gen_sp	Cricetidae_gen_sp	cricetids	10.7994	789	56
1090	21676	21711	asmar_ric_desflaches	14210	2016	8	Male	9	Tetrapoda	Mammalia	Rodentia	Myomorpha	Muroidea_fam_gen_sp	Muroidea_fam_gen_sp	Muroidea_fam_gen_sp	muroids	10.9824	765	57
1091	8162	8189	asmar_ric_desflaches	14210	2015	11	Male	8	Tetrapoda	Mammalia	Rodentia	Myomorpha	Muroidea_fam_gen_sp	Muroidea_fam_gen_sp	Muroidea_fam_gen_sp	muroids	10.7994	789	56
1092	16364	16399	asmar_ric_desflaches	14210	2016	5	Male	9	Tetrapoda	Mammalia	Rodentia	Myomorpha	Muroidea_fam_gen_sp	Muroidea_fam_gen_sp	Muroidea_fam_gen_sp	muroids	10.7994	789	56
1093	17542	17577	asmar_ric_desflaches	14210	2016	6	Male	9	Tetrapoda	Mammalia	Rodentia	Myomorpha	Muroidea_fam_gen_sp	Muroidea_fam_gen_sp	Muroidea_fam_gen_sp	muroids	10.7994	789	56
1094	18090	18125	asmar_ric_desflaches	14210	2016	6	Male	9	Tetrapoda	Mammalia	Rodentia	Myomorpha	Muroidea_fam_gen_sp	Muroidea_fam_gen_sp	Muroidea_fam_gen_sp	muroids	10.7994	789	56
1095	7049	7076	asmar_ric_desflaches	14210	2015	10	Male	8	Tetrapoda	Mammalia	Rodentia	Myomorpha	Muridae	micromys	Micromys_minutus	muroids	10.7994	789	56
1096	5784	5806	asmar_ric_desflaches	14210	2015	10	Male	8	Tetrapoda	Mammalia	Rodentia	Myomorpha	Muridae	micromys	Micromys_minutus	muroids	10.7994	789	56
1097	6577	6599	asmar_ric_desflaches	14210	2015	10	Male	8	Tetrapoda	Mammalia	Rodentia	Myomorpha	Muridae	micromys	Micromys_minutus	muroids	10.7994	789	56
1098	21721	21756	asmar_ric_desflaches	14210	2016	8	Male	9	Tetrapoda	Mammalia	Rodentia	Myomorpha	Muridae	mus	Mus_musculus	muroids	10.9824	765	57
1099	7051	7078	asmar_ric_desflaches	14210	2015	10	Male	8	Tetrapoda	Mammalia	Rodentia	Myomorpha	Muridae	mus	Mus_musculus	muroids	10.7994	789	56
1100	18091	18126	asmar_ric_desflaches	14210	2016	6	Male	9	Tetrapoda	Mammalia	Rodentia	Myomorpha	Muridae	mus	Mus_musculus	muroids	10.7994	789	56
1101	18282	18317	asmar_ric_desflaches	14210	2016	6	Male	9	Tetrapoda	Mammalia	Rodentia	Myomorpha	Muridae	mus	Mus_musculus	muroids	10.7994	789	56
1102	12843	12878	assia_vanessa_robert	43320	2016	4	Femelle	6	Tetrapoda	Mammalia	Rodentia	Myomorpha	Muroidea_fam_gen_sp	Muroidea_fam_gen_sp	Muroidea_fam_gen_sp	muroids	7.76733	838	40
1103	3632	3654	astuce_romain_baghi	31400	2015	6	Male	11	Tetrapoda	Aves	Passeriformes	Passeri	Paridae	cyanistes	Cyanistes_caeruleus	passeriforms	13.0429	700	81
1104	15938	15973	athena_celia_beaudoin	68130	2016	5	Femelle	1	Tetrapoda	Aves	Passeriformes	Passeri	Paridae	Paridae_gen_sp	Paridae_gen_sp	passeriforms	9.66075	802	46
1105	26991	27026	athena_celia_beaudoin	68130	2017	4	Femelle	2	Tetrapoda	Aves	Passeriformes	Passeri	Paridae	Paridae_gen_sp	Paridae_gen_sp	passeriforms	9.66075	802	46
1106	25302	25337	athena_celia_beaudoin	68130	2016	12	Femelle	1	Tetrapoda	Aves	Passeriformes	Passeri	Passeridae	passer	Passer_sp	passeriforms	9.66075	802	46
1107	28605	28640	athena_celia_beaudoin	68130	2017	6	Femelle	2	Tetrapoda	Aves	Passeriformes	Passeri	Passeridae	passer	Passer_sp	passeriforms	9.66075	802	46
1108	25929	25964	athena_celia_beaudoin	68130	2017	2	Femelle	2	Tetrapoda	Aves	Passeriformes	Passeri	Passeridae	passer	Passer_sp	passeriforms	9.66075	802	46
1109	21645	21680	athena_celia_beaudoin	68130	2016	8	Femelle	1	Tetrapoda	Aves	Passeriformes	Passeri	Passeridae	passer	Passer_sp	passeriforms	9.66075	802	46
1110	21646	21681	athena_celia_beaudoin	68130	2016	8	Femelle	1	Tetrapoda	Aves	Passeriformes	Passeri	Passeridae	passer	Passer_sp	passeriforms	9.66075	802	46
1111	19494	19529	athena_celia_beaudoin	68130	2016	7	Femelle	1	Tetrapoda	Aves	Passeriformes	Passeri	Passeridae	passer	Passer_sp	passeriforms	9.66075	802	46
1112	23004	23039	athena_celia_beaudoin	68130	2016	9	Femelle	1	Tetrapoda	Aves	Aves_ord_fam_gen_sp	Aves_ord_fam_gen_sp	Aves_ord_fam_gen_sp	Aves_ord_fam_gen_sp	Aves_ord_fam_gen_sp	other_birds	9.66075	802	46
1113	24532	24567	athena_celia_beaudoin	68130	2016	11	Femelle	1	Tetrapoda	Aves	Aves_ord_fam_gen_sp	Aves_ord_fam_gen_sp	Aves_ord_fam_gen_sp	Aves_ord_fam_gen_sp	Aves_ord_fam_gen_sp	other_birds	9.66075	802	46
1114	25555	25590	athena_celia_beaudoin	68130	2017	1	Femelle	2	Tetrapoda	Aves	Passeriformes	Passeri_fam_gen_sp	Passeri_fam_gen_sp	Passeri_fam_gen_sp	Passeri_fam_gen_sp	passeriforms	9.66075	802	46
1115	28827	28862	athena_celia_beaudoin	68130	2017	7	Femelle	2	Tetrapoda	Aves	Passeriformes	Passeri_fam_gen_sp	Passeri_fam_gen_sp	Passeri_fam_gen_sp	Passeri_fam_gen_sp	passeriforms	9.66075	802	46
1116	17988	18023	athena_celia_beaudoin	68130	2016	6	Femelle	1	Tetrapoda	Aves	Passeriformes	Passeri_fam_gen_sp	Passeri_fam_gen_sp	Passeri_fam_gen_sp	Passeri_fam_gen_sp	passeriforms	9.66075	802	46
1117	28823	28858	athena_celia_beaudoin	68130	2017	7	Femelle	2	Tetrapoda	Aves	Piciformes	Pici	Picidae	picus	Picus_viridis	other_birds	9.66075	802	46
1118	23328	23363	athena_celia_beaudoin	68130	2016	10	Femelle	1	Tetrapoda	Aves	Passeriformes	Passeri	Muscicapidae	erithacus	Erithacus_rubecula	passeriforms	9.66075	802	46
1119	25306	25341	athena_celia_beaudoin	68130	2016	12	Femelle	1	Tetrapoda	Aves	Passeriformes	Passeri	Muscicapidae	erithacus	Erithacus_rubecula	passeriforms	9.66075	802	46
1120	22013	22048	athena_celia_beaudoin	68130	2016	8	Femelle	1	Tetrapoda	Mammalia	Rodentia	Myomorpha	Cricetidae	Cricetidae_gen_sp	Cricetidae_gen_sp	cricetids	9.66075	802	46
1121	22337	22372	athena_celia_beaudoin	68130	2016	9	Femelle	1	Tetrapoda	Mammalia	Rodentia	Myomorpha	Cricetidae	Cricetidae_gen_sp	Cricetidae_gen_sp	cricetids	9.66075	802	46
1122	22437	22472	athena_celia_beaudoin	68130	2016	9	Femelle	1	Tetrapoda	Mammalia	Rodentia	Myomorpha	Cricetidae	Cricetidae_gen_sp	Cricetidae_gen_sp	cricetids	9.66075	802	46
1123	23475	23510	athena_celia_beaudoin	68130	2016	10	Femelle	1	Tetrapoda	Mammalia	Rodentia	Myomorpha	Cricetidae	Cricetidae_gen_sp	Cricetidae_gen_sp	cricetids	9.66075	802	46
1124	23477	23512	athena_celia_beaudoin	68130	2016	10	Femelle	1	Tetrapoda	Mammalia	Rodentia	Myomorpha	Cricetidae	Cricetidae_gen_sp	Cricetidae_gen_sp	cricetids	9.66075	802	46
1125	23562	23597	athena_celia_beaudoin	68130	2016	10	Femelle	1	Tetrapoda	Mammalia	Rodentia	Myomorpha	Cricetidae	Cricetidae_gen_sp	Cricetidae_gen_sp	cricetids	9.66075	802	46
1126	23564	23599	athena_celia_beaudoin	68130	2016	10	Femelle	1	Tetrapoda	Mammalia	Rodentia	Myomorpha	Cricetidae	Cricetidae_gen_sp	Cricetidae_gen_sp	cricetids	9.66075	802	46
1127	23565	23600	athena_celia_beaudoin	68130	2016	10	Femelle	1	Tetrapoda	Mammalia	Rodentia	Myomorpha	Cricetidae	Cricetidae_gen_sp	Cricetidae_gen_sp	cricetids	9.66075	802	46
1128	24276	24311	athena_celia_beaudoin	68130	2016	11	Femelle	1	Tetrapoda	Mammalia	Rodentia	Myomorpha	Cricetidae	Cricetidae_gen_sp	Cricetidae_gen_sp	cricetids	9.66075	802	46
1129	24529	24564	athena_celia_beaudoin	68130	2016	11	Femelle	1	Tetrapoda	Mammalia	Rodentia	Myomorpha	Cricetidae	Cricetidae_gen_sp	Cricetidae_gen_sp	cricetids	9.66075	802	46
1130	24533	24568	athena_celia_beaudoin	68130	2016	11	Femelle	1	Tetrapoda	Mammalia	Rodentia	Myomorpha	Cricetidae	Cricetidae_gen_sp	Cricetidae_gen_sp	cricetids	9.66075	802	46
1131	25303	25338	athena_celia_beaudoin	68130	2016	12	Femelle	1	Tetrapoda	Mammalia	Rodentia	Myomorpha	Cricetidae	Cricetidae_gen_sp	Cricetidae_gen_sp	cricetids	9.66075	802	46
1132	26327	26362	athena_celia_beaudoin	68130	2017	3	Femelle	2	Tetrapoda	Mammalia	Rodentia	Myomorpha	Cricetidae	Cricetidae_gen_sp	Cricetidae_gen_sp	cricetids	9.66075	802	46
1133	27284	27319	athena_celia_beaudoin	68130	2017	5	Femelle	2	Tetrapoda	Mammalia	Rodentia	Myomorpha	Cricetidae	Cricetidae_gen_sp	Cricetidae_gen_sp	cricetids	9.66075	802	46
1134	27689	27724	athena_celia_beaudoin	68130	2017	5	Femelle	2	Tetrapoda	Mammalia	Rodentia	Myomorpha	Cricetidae	Cricetidae_gen_sp	Cricetidae_gen_sp	cricetids	9.66075	802	46
1135	28187	28222	athena_celia_beaudoin	68130	2017	6	Femelle	2	Tetrapoda	Mammalia	Rodentia	Myomorpha	Cricetidae	Cricetidae_gen_sp	Cricetidae_gen_sp	cricetids	9.66075	802	46
1136	28189	28224	athena_celia_beaudoin	68130	2017	6	Femelle	2	Tetrapoda	Mammalia	Rodentia	Myomorpha	Cricetidae	Cricetidae_gen_sp	Cricetidae_gen_sp	cricetids	9.66075	802	46
1137	29606	29641	athena_celia_beaudoin	68130	2017	8	Femelle	2	Tetrapoda	Mammalia	Rodentia	Myomorpha	Cricetidae	Cricetidae_gen_sp	Cricetidae_gen_sp	cricetids	9.66075	802	46
1138	29610	29645	athena_celia_beaudoin	68130	2017	8	Femelle	2	Tetrapoda	Mammalia	Rodentia	Myomorpha	Cricetidae	Cricetidae_gen_sp	Cricetidae_gen_sp	cricetids	9.66075	802	46
1139	28598	28633	athena_celia_beaudoin	68130	2017	6	Femelle	2	Tetrapoda	Mammalia	Rodentia	Myomorpha	Cricetidae	Cricetidae_gen_sp	Cricetidae_gen_sp	cricetids	9.66075	802	46
1140	18536	18571	athena_celia_beaudoin	68130	2016	6	Femelle	1	Tetrapoda	Mammalia	Rodentia	Myomorpha	Cricetidae	Cricetidae_gen_sp	Cricetidae_gen_sp	cricetids	9.66075	802	46
1141	18537	18572	athena_celia_beaudoin	68130	2016	6	Femelle	1	Tetrapoda	Mammalia	Rodentia	Myomorpha	Cricetidae	Cricetidae_gen_sp	Cricetidae_gen_sp	cricetids	9.66075	802	46
1142	18538	18573	athena_celia_beaudoin	68130	2016	6	Femelle	1	Tetrapoda	Mammalia	Rodentia	Myomorpha	Cricetidae	Cricetidae_gen_sp	Cricetidae_gen_sp	cricetids	9.66075	802	46
1143	21707	21742	athena_celia_beaudoin	68130	2016	8	Femelle	1	Tetrapoda	Mammalia	Rodentia	Myomorpha	Cricetidae	Cricetidae_gen_sp	Cricetidae_gen_sp	cricetids	9.66075	802	46
1144	21794	21829	athena_celia_beaudoin	68130	2016	8	Femelle	1	Tetrapoda	Mammalia	Rodentia	Myomorpha	Cricetidae	Cricetidae_gen_sp	Cricetidae_gen_sp	cricetids	9.66075	802	46
1145	16860	16895	athena_celia_beaudoin	68130	2016	6	Femelle	1	Tetrapoda	Mammalia	Rodentia	Myomorpha	Cricetidae	Cricetidae_gen_sp	Cricetidae_gen_sp	cricetids	9.66075	802	46
1146	19750	19785	athena_celia_beaudoin	68130	2016	7	Femelle	1	Tetrapoda	Mammalia	Rodentia	Myomorpha	Cricetidae	Cricetidae_gen_sp	Cricetidae_gen_sp	cricetids	9.66075	802	46
1147	16747	16782	athena_celia_beaudoin	68130	2016	6	Femelle	1	Tetrapoda	Mammalia	Rodentia	Myomorpha	Cricetidae	Cricetidae_gen_sp	Cricetidae_gen_sp	cricetids	9.66075	802	46
1148	18588	18623	athena_celia_beaudoin	68130	2016	6	Femelle	1	Tetrapoda	Mammalia	Rodentia	Myomorpha	Cricetidae	Cricetidae_gen_sp	Cricetidae_gen_sp	cricetids	9.66075	802	46
1149	28239	28274	athena_celia_beaudoin	68130	2017	6	Femelle	2	Tetrapoda	Mammalia	Rodentia	Myomorpha	Cricetidae	Cricetidae_gen_sp	Cricetidae_gen_sp	cricetids	9.66075	802	46
1150	28821	28856	athena_celia_beaudoin	68130	2017	7	Femelle	2	Tetrapoda	Mammalia	Rodentia	Myomorpha	Cricetidae	Cricetidae_gen_sp	Cricetidae_gen_sp	cricetids	9.66075	802	46
1151	19752	19787	athena_celia_beaudoin	68130	2016	7	Femelle	1	Tetrapoda	Mammalia	Rodentia	Myomorpha	Cricetidae	Cricetidae_gen_sp	Cricetidae_gen_sp	cricetids	9.66075	802	46
1152	26990	27025	athena_celia_beaudoin	68130	2017	4	Femelle	2	Tetrapoda	Mammalia	Rodentia	Myomorpha	Cricetidae	Cricetidae_gen_sp	Cricetidae_gen_sp	cricetids	9.66075	802	46
1153	16815	16850	athena_celia_beaudoin	68130	2016	6	Femelle	1	Tetrapoda	Mammalia	Rodentia	Myomorpha	Cricetidae	Cricetidae_gen_sp	Cricetidae_gen_sp	cricetids	9.66075	802	46
1154	19790	19825	athena_celia_beaudoin	68130	2016	7	Femelle	1	Tetrapoda	Mammalia	Rodentia	Myomorpha	Cricetidae	Cricetidae_gen_sp	Cricetidae_gen_sp	cricetids	9.66075	802	46
1155	28825	28860	athena_celia_beaudoin	68130	2017	7	Femelle	2	Tetrapoda	Mammalia	Rodentia	Myomorpha	Cricetidae	Cricetidae_gen_sp	Cricetidae_gen_sp	cricetids	9.66075	802	46
1156	15597	15632	athena_celia_beaudoin	68130	2016	5	Femelle	1	Tetrapoda	Mammalia	Rodentia	Myomorpha	Cricetidae	Cricetidae_gen_sp	Cricetidae_gen_sp	cricetids	9.66075	802	46
1157	21793	21828	athena_celia_beaudoin	68130	2016	8	Femelle	1	Tetrapoda	Mammalia	Rodentia	Myomorpha	Cricetidae	Cricetidae_gen_sp	Cricetidae_gen_sp	cricetids	9.66075	802	46
1158	21297	21332	athena_celia_beaudoin	68130	2016	8	Femelle	1	Tetrapoda	Mammalia	Rodentia	Myomorpha	Cricetidae	Cricetidae_gen_sp	Cricetidae_gen_sp	cricetids	9.66075	802	46
1159	27285	27320	athena_celia_beaudoin	68130	2017	5	Femelle	2	Tetrapoda	Mammalia	Chiroptera	Chiroptera_fam_gen_sp	Chiroptera_fam_gen_sp	Chiroptera_fam_gen_sp	Chiroptera_fam_gen_sp	other_mammals	9.66075	802	46
1160	22335	22370	athena_celia_beaudoin	68130	2016	9	Femelle	1	Tetrapoda	Mammalia	Rodentia	Myomorpha	Cricetidae	arvicola	Arvicola_sp	cricetids	9.66075	802	46
1161	22340	22375	athena_celia_beaudoin	68130	2016	9	Femelle	1	Tetrapoda	Mammalia	Rodentia	Myomorpha	Cricetidae	arvicola	Arvicola_sp	cricetids	9.66075	802	46
1162	23223	23258	athena_celia_beaudoin	68130	2016	9	Femelle	1	Tetrapoda	Mammalia	Rodentia	Myomorpha	Cricetidae	arvicola	Arvicola_sp	cricetids	9.66075	802	46
1163	23792	23827	athena_celia_beaudoin	68130	2016	10	Femelle	1	Tetrapoda	Mammalia	Rodentia	Myomorpha	Cricetidae	arvicola	Arvicola_sp	cricetids	9.66075	802	46
1164	24148	24183	athena_celia_beaudoin	68130	2016	10	Femelle	1	Tetrapoda	Mammalia	Rodentia	Myomorpha	Cricetidae	arvicola	Arvicola_sp	cricetids	9.66075	802	46
1165	16167	16202	athena_celia_beaudoin	68130	2016	5	Femelle	1	Tetrapoda	Mammalia	Rodentia	Myomorpha	Cricetidae	arvicola	Arvicola_sp	cricetids	9.66075	802	46
1166	24535	24570	athena_celia_beaudoin	68130	2016	12	Femelle	1	Tetrapoda	Mammalia	Rodentia	Myomorpha	Muroidea_fam_gen_sp	Muroidea_fam_gen_sp	Muroidea_fam_gen_sp	muroids	9.66075	802	46
1167	22439	22474	athena_celia_beaudoin	68130	2016	9	Femelle	1	Tetrapoda	Mammalia	Mammalia_ord_fam_gen_sp	Mammalia_ord_fam_gen_sp	Mammalia_ord_fam_gen_sp	Mammalia_ord_fam_gen_sp	Mammalia_ord_fam_gen_sp	other_mammals	9.66075	802	46
1168	22740	22775	athena_celia_beaudoin	68130	2016	9	Femelle	1	Tetrapoda	Mammalia	Mammalia_ord_fam_gen_sp	Mammalia_ord_fam_gen_sp	Mammalia_ord_fam_gen_sp	Mammalia_ord_fam_gen_sp	Mammalia_ord_fam_gen_sp	other_mammals	9.66075	802	46
1169	22923	22958	athena_celia_beaudoin	68130	2016	9	Femelle	1	Tetrapoda	Mammalia	Mammalia_ord_fam_gen_sp	Mammalia_ord_fam_gen_sp	Mammalia_ord_fam_gen_sp	Mammalia_ord_fam_gen_sp	Mammalia_ord_fam_gen_sp	other_mammals	9.66075	802	46
1170	26329	26364	athena_celia_beaudoin	68130	2017	3	Femelle	2	Tetrapoda	Mammalia	Mammalia_ord_fam_gen_sp	Mammalia_ord_fam_gen_sp	Mammalia_ord_fam_gen_sp	Mammalia_ord_fam_gen_sp	Mammalia_ord_fam_gen_sp	other_mammals	9.66075	802	46
1171	28188	28223	athena_celia_beaudoin	68130	2017	6	Femelle	2	Tetrapoda	Mammalia	Mammalia_ord_fam_gen_sp	Mammalia_ord_fam_gen_sp	Mammalia_ord_fam_gen_sp	Mammalia_ord_fam_gen_sp	Mammalia_ord_fam_gen_sp	other_mammals	9.66075	802	46
1172	29605	29640	athena_celia_beaudoin	68130	2017	8	Femelle	2	Tetrapoda	Mammalia	Mammalia_ord_fam_gen_sp	Mammalia_ord_fam_gen_sp	Mammalia_ord_fam_gen_sp	Mammalia_ord_fam_gen_sp	Mammalia_ord_fam_gen_sp	other_mammals	9.66075	802	46
1173	17070	17105	athena_celia_beaudoin	68130	2016	6	Femelle	1	Tetrapoda	Mammalia	Mammalia_ord_fam_gen_sp	Mammalia_ord_fam_gen_sp	Mammalia_ord_fam_gen_sp	Mammalia_ord_fam_gen_sp	Mammalia_ord_fam_gen_sp	other_mammals	9.66075	802	46
1174	23698	23733	athena_celia_beaudoin	68130	2016	10	Femelle	1	Tetrapoda	Mammalia	Rodentia	Myomorpha	Muridae	apodemus	Apodemus_sp	muroids	9.66075	802	46
1175	29609	29644	athena_celia_beaudoin	68130	2017	8	Femelle	2	Tetrapoda	Mammalia	Rodentia	Myomorpha	Muridae	apodemus	Apodemus_sp	muroids	9.66075	802	46
1176	22438	22473	athena_celia_beaudoin	68130	2016	9	Femelle	1	Tetrapoda	Mammalia	Eulipotyphla	Soricidae	Soricidae	Soricidae_gen_sp	Soricidae_gen_sp	soricids	9.66075	802	46
1177	23002	23037	athena_celia_beaudoin	68130	2016	9	Femelle	1	Tetrapoda	Mammalia	Eulipotyphla	Soricidae	Soricidae	Soricidae_gen_sp	Soricidae_gen_sp	soricids	9.66075	802	46
1178	23003	23038	athena_celia_beaudoin	68130	2016	9	Femelle	1	Tetrapoda	Mammalia	Eulipotyphla	Soricidae	Soricidae	Soricidae_gen_sp	Soricidae_gen_sp	soricids	9.66075	802	46
1179	25297	25332	athena_celia_beaudoin	68130	2016	12	Femelle	1	Tetrapoda	Mammalia	Eulipotyphla	Soricidae	Soricidae	Soricidae_gen_sp	Soricidae_gen_sp	soricids	9.66075	802	46
1180	25300	25335	athena_celia_beaudoin	68130	2016	12	Femelle	1	Tetrapoda	Mammalia	Eulipotyphla	Soricidae	Soricidae	Soricidae_gen_sp	Soricidae_gen_sp	soricids	9.66075	802	46
1181	25308	25343	athena_celia_beaudoin	68130	2017	1	Femelle	2	Tetrapoda	Mammalia	Eulipotyphla	Soricidae	Soricidae	Soricidae_gen_sp	Soricidae_gen_sp	soricids	9.66075	802	46
1182	28603	28638	athena_celia_beaudoin	68130	2017	6	Femelle	2	Tetrapoda	Mammalia	Eulipotyphla	Soricidae	Soricidae	Soricidae_gen_sp	Soricidae_gen_sp	soricids	9.66075	802	46
1183	16006	16041	athena_celia_beaudoin	68130	2016	5	Femelle	1	Tetrapoda	Mammalia	Eulipotyphla	Soricidae	Soricidae	Soricidae_gen_sp	Soricidae_gen_sp	soricids	9.66075	802	46
1184	27443	27478	athena_celia_beaudoin	68130	2017	5	Femelle	2	Tetrapoda	Mammalia	Eulipotyphla	Soricidae	Soricidae	Soricidae_gen_sp	Soricidae_gen_sp	soricids	9.66075	802	46
1185	16230	16265	athena_celia_beaudoin	68130	2016	5	Femelle	1	Tetrapoda	Mammalia	Eulipotyphla	Soricidae	Soricidae	Soricidae_gen_sp	Soricidae_gen_sp	soricids	9.66075	802	46
1186	21594	21629	athena_celia_beaudoin	68130	2016	8	Femelle	1	Tetrapoda	Mammalia	Eulipotyphla	Soricidae	Soricidae	Soricidae_gen_sp	Soricidae_gen_sp	soricids	9.66075	802	46
1187	19493	19528	athena_celia_beaudoin	68130	2016	7	Femelle	1	Tetrapoda	Mammalia	Eulipotyphla	Soricidae	Soricidae	Soricidae_gen_sp	Soricidae_gen_sp	soricids	9.66075	802	46
1188	28185	28220	athena_celia_beaudoin	68130	2017	6	Femelle	2	Tetrapoda	Mammalia	Eulipotyphla	Soricidae	Soricidae	Soricidae_gen_sp	Soricidae_gen_sp	soricids	9.66075	802	46
1189	15616	15651	athena_celia_beaudoin	68130	2016	5	Femelle	1	Tetrapoda	Mammalia	Eulipotyphla	Soricidae	Soricidae	Soricidae_gen_sp	Soricidae_gen_sp	soricids	9.66075	802	46
1190	17563	17598	athena_celia_beaudoin	68130	2016	6	Femelle	1	Tetrapoda	Mammalia	Eulipotyphla	Soricidae	Soricidae	Soricidae_gen_sp	Soricidae_gen_sp	soricids	9.66075	802	46
1191	18589	18624	athena_celia_beaudoin	68130	2016	6	Femelle	1	Tetrapoda	Mammalia	Eulipotyphla	Soricidae	Soricidae	Soricidae_gen_sp	Soricidae_gen_sp	soricids	9.66075	802	46
1192	17997	18032	athena_celia_beaudoin	68130	2016	6	Femelle	1	Tetrapoda	Mammalia	Eulipotyphla	Soricidae	Soricidae	Soricidae_gen_sp	Soricidae_gen_sp	soricids	9.66075	802	46
1193	21774	21809	athena_celia_beaudoin	68130	2016	8	Femelle	1	Tetrapoda	Mammalia	Eulipotyphla	Soricidae	Soricidae	Soricidae_gen_sp	Soricidae_gen_sp	soricids	9.66075	802	46
1194	22056	22091	athena_celia_beaudoin	68130	2016	8	Femelle	1	Tetrapoda	Mammalia	Rodentia	Myomorpha	Muroidea_fam_gen_sp	Muroidea_fam_gen_sp	Muroidea_fam_gen_sp	muroids	9.66075	802	46
1195	23061	23096	athena_celia_beaudoin	68130	2016	9	Femelle	1	Tetrapoda	Mammalia	Rodentia	Myomorpha	Muroidea_fam_gen_sp	Muroidea_fam_gen_sp	Muroidea_fam_gen_sp	muroids	9.66075	802	46
1196	23366	23401	athena_celia_beaudoin	68130	2016	10	Femelle	1	Tetrapoda	Mammalia	Rodentia	Myomorpha	Muroidea_fam_gen_sp	Muroidea_fam_gen_sp	Muroidea_fam_gen_sp	muroids	9.66075	802	46
1197	23478	23513	athena_celia_beaudoin	68130	2016	10	Femelle	1	Tetrapoda	Mammalia	Rodentia	Myomorpha	Muroidea_fam_gen_sp	Muroidea_fam_gen_sp	Muroidea_fam_gen_sp	muroids	9.66075	802	46
1198	23700	23735	athena_celia_beaudoin	68130	2016	10	Femelle	1	Tetrapoda	Mammalia	Rodentia	Myomorpha	Muroidea_fam_gen_sp	Muroidea_fam_gen_sp	Muroidea_fam_gen_sp	muroids	9.66075	802	46
1199	23793	23828	athena_celia_beaudoin	68130	2016	10	Femelle	1	Tetrapoda	Mammalia	Rodentia	Myomorpha	Muroidea_fam_gen_sp	Muroidea_fam_gen_sp	Muroidea_fam_gen_sp	muroids	9.66075	802	46
1200	24150	24185	athena_celia_beaudoin	68130	2016	11	Femelle	1	Tetrapoda	Mammalia	Rodentia	Myomorpha	Muroidea_fam_gen_sp	Muroidea_fam_gen_sp	Muroidea_fam_gen_sp	muroids	9.66075	802	46
1201	24531	24566	athena_celia_beaudoin	68130	2016	11	Femelle	1	Tetrapoda	Mammalia	Rodentia	Myomorpha	Muroidea_fam_gen_sp	Muroidea_fam_gen_sp	Muroidea_fam_gen_sp	muroids	9.66075	802	46
1202	25299	25334	athena_celia_beaudoin	68130	2016	12	Femelle	1	Tetrapoda	Mammalia	Rodentia	Myomorpha	Muroidea_fam_gen_sp	Muroidea_fam_gen_sp	Muroidea_fam_gen_sp	muroids	9.66075	802	46
1203	29612	29647	athena_celia_beaudoin	68130	2017	8	Femelle	2	Tetrapoda	Mammalia	Rodentia	Myomorpha	Muroidea_fam_gen_sp	Muroidea_fam_gen_sp	Muroidea_fam_gen_sp	muroids	9.66075	802	46
1204	29770	29805	athena_celia_beaudoin	68130	2017	9	Femelle	2	Tetrapoda	Mammalia	Rodentia	Myomorpha	Muroidea_fam_gen_sp	Muroidea_fam_gen_sp	Muroidea_fam_gen_sp	muroids	9.66075	802	46
1205	22121	22156	athena_celia_beaudoin	68130	2016	8	Femelle	1	Tetrapoda	Mammalia	Rodentia	Myomorpha	Muridae	mus	Mus_musculus	muroids	9.66075	802	46
1206	27287	27322	athena_celia_beaudoin	68130	2017	5	Femelle	2	Tetrapoda	Mammalia	Rodentia	Myomorpha	Muridae	mus	Mus_musculus	muroids	9.66075	802	46
1207	28601	28636	athena_celia_beaudoin	68130	2017	6	Femelle	2	Tetrapoda	Mammalia	Rodentia	Myomorpha	Muridae	mus	Mus_musculus	muroids	9.66075	802	46
1208	27793	27828	athena_celia_beaudoin	68130	2017	6	Femelle	2	Tetrapoda	Mammalia	Rodentia	Myomorpha	Muridae	mus	Mus_musculus	muroids	9.66075	802	46
1209	29005	29040	athena_celia_beaudoin	68130	2017	7	Femelle	2	Tetrapoda	Mammalia	Rodentia	Myomorpha	Muridae	mus	Mus_musculus	muroids	9.66075	802	46
1210	9717	9744	athena_maote_waeffler	57810	2015	12	Femelle	9	Tetrapoda	Mammalia	Rodentia	Myomorpha	Cricetidae	microtus	Microtus_arvalis	cricetids	9.57196	786	26
1211	3121	3143	athena_maote_waeffler	57810	2015	9	Femelle	9	Tetrapoda	Mammalia	Rodentia	Myomorpha	Cricetidae	microtus	Microtus_arvalis	cricetids	9.57196	786	26
1212	9718	9745	athena_maote_waeffler	57810	2016	1	Femelle	10	Tetrapoda	Mammalia	Rodentia	Myomorpha	Cricetidae	microtus	Microtus_arvalis	cricetids	9.57196	786	26
1213	3122	3144	athena_maote_waeffler	57810	2015	9	Femelle	9	Tetrapoda	Mammalia	Rodentia	Myomorpha	Cricetidae	arvicola	Arvicola_amphibius	cricetids	9.57196	786	26
1214	30266	30301	athena_pascaline_lacroix	26100	2017	8	Femelle	12	Tetrapoda	Aves	Passeriformes	Passeri_fam_gen_sp	Passeri_fam_gen_sp	Passeri_fam_gen_sp	Passeri_fam_gen_sp	passeriforms	12.4261	892	87
1215	30267	30302	athena_pascaline_lacroix	26100	2017	8	Femelle	12	Tetrapoda	Aves	Passeriformes	Passeri_fam_gen_sp	Passeri_fam_gen_sp	Passeri_fam_gen_sp	Passeri_fam_gen_sp	passeriforms	12.4261	892	87
1216	25283	25318	athena_pascaline_lacroix	26100	2016	12	Femelle	11	Tetrapoda	Aves	Columbiformes	Columbiformes	Columbidae	streptopelia	Streptopelia_decaocto	other_birds	12.4261	892	87
1217	12418	12453	athos_marie_jose_bind	67750	2016	4	Male	4	Tetrapoda	Mammalia	Rodentia	Myomorpha	Cricetidae	Cricetidae_gen_sp	Cricetidae_gen_sp	cricetids	10.4584	727	71
1218	8347	8374	attila_eliette_darnaud	74540	2015	11	Male	1	Tetrapoda	Mammalia	Rodentia	Myomorpha	Cricetidae	Cricetidae_gen_sp	Cricetidae_gen_sp	cricetids	10.2422	1039	39
1219	7084	7111	attila_eva_picard	35320	2015	10	Male	1	Tetrapoda	Aves	Passeriformes	Passeri	Turdidae	turdus	Turdus_sp	passeriforms	11.4093	770	32
1220	8307	8334	attila_eva_picard	35320	2015	11	Male	1	Tetrapoda	Mammalia	Rodentia	Myomorpha	Muridae	apodemus	Apodemus_sp	muroids	11.4093	770	32
1221	15383	15418	auda_nathalie_moraine	29550	2016	5	Femelle	5	Tetrapoda	Mammalia	Rodentia	Myomorpha	Muridae	apodemus	Apodemus_sp	muroids	11.2586	1088	46
1222	13811	13846	audi_stephanie__rouillon	77170	2016	4	Femelle	4	Tetrapoda	Squamata	Squamata	Lacertilia	Lacertidae	lacerta	Lacerta_sp	lacertilia	10.6205	637	90
1223	979	1001	audi_virginie_dumas	13520	2015	8	Femelle	6	Tetrapoda	Mammalia	Chiroptera	Chiroptera_fam_gen_sp	Chiroptera_fam_gen_sp	Chiroptera_fam_gen_sp	Chiroptera_fam_gen_sp	other_mammals	14.4678	744	25
1224	35281	35316	augustine_marie_darquy	35235	2019	5	Femelle	1	Tetrapoda	Mammalia	Eulipotyphla	Soricidae	Soricidae	Soricidae_gen_sp	Soricidae_gen_sp	soricids	11.3484	733	56
1225	35937	35972	aurea_xavier_fontaine	79370	2019	7	Femelle	1	Tetrapoda	Aves	Passeriformes	Passeri	Hirundinidae	delichon	Delichon_urbicum	passeriforms	11.9325	885	40
1226	35931	35966	aurea_xavier_fontaine	79370	2019	6	Femelle	1	Tetrapoda	Aves	Passeriformes	Passeri	Muscicapidae	phoenicurus	Phoenicurus_ochruros	passeriforms	11.9325	885	40
1227	36095	36130	aurea_xavier_fontaine	79370	2019	7	Femelle	1	Tetrapoda	Mammalia	Rodentia	Myomorpha	Cricetidae	microtus	Microtus_arvalis	cricetids	11.9325	885	40
1228	36096	36131	aurea_xavier_fontaine	79370	2019	7	Femelle	1	Tetrapoda	Mammalia	Rodentia	Myomorpha	Cricetidae	microtus	Microtus_arvalis	cricetids	11.9325	885	40
1229	36172	36207	aurea_xavier_fontaine	79370	2019	7	Femelle	1	Tetrapoda	Mammalia	Rodentia	Myomorpha	Cricetidae	microtus	Microtus_arvalis	cricetids	11.9325	885	40
1230	36264	36299	aurea_xavier_fontaine	79370	2019	7	Femelle	1	Tetrapoda	Mammalia	Rodentia	Myomorpha	Cricetidae	microtus	Microtus_arvalis	cricetids	11.9325	885	40
1231	36265	36300	aurea_xavier_fontaine	79370	2019	7	Femelle	1	Tetrapoda	Mammalia	Rodentia	Myomorpha	Cricetidae	microtus	Microtus_arvalis	cricetids	11.9325	885	40
1232	36474	36510	aurea_xavier_fontaine	79370	2019	8	Femelle	1	Tetrapoda	Mammalia	Rodentia	Myomorpha	Cricetidae	microtus	Microtus_arvalis	cricetids	11.9325	885	40
1233	36607	36643	aurea_xavier_fontaine	79370	2019	8	Femelle	1	Tetrapoda	Mammalia	Rodentia	Myomorpha	Cricetidae	microtus	Microtus_arvalis	cricetids	11.9325	885	40
1234	36741	36777	aurea_xavier_fontaine	79370	2019	9	Femelle	1	Tetrapoda	Mammalia	Rodentia	Myomorpha	Cricetidae	microtus	Microtus_arvalis	cricetids	11.9325	885	40
1235	35941	35976	aurea_xavier_fontaine	79370	2019	7	Femelle	1	Tetrapoda	Mammalia	Rodentia	Myomorpha	Muridae	apodemus	Apodemus_sp	muroids	11.9325	885	40
1236	36690	36726	aurea_xavier_fontaine	79370	2019	8	Femelle	1	Tetrapoda	Mammalia	Rodentia	Myomorpha	Muridae	apodemus	Apodemus_sp	muroids	11.9325	885	40
1237	34957	34992	aurea_xavier_fontaine	79370	2019	3	Femelle	1	Tetrapoda	Mammalia	Eulipotyphla	Soricidae	Soricidae	Soricidae_gen_sp	Soricidae_gen_sp	soricids	11.9325	885	40
1238	34958	34993	aurea_xavier_fontaine	79370	2019	4	Femelle	1	Tetrapoda	Mammalia	Eulipotyphla	Soricidae	Soricidae	Soricidae_gen_sp	Soricidae_gen_sp	soricids	11.9325	885	40
1239	35930	35965	aurea_xavier_fontaine	79370	2019	7	Femelle	1	Tetrapoda	Mammalia	Rodentia	Myomorpha	Muridae	mus	Mus_musculus	muroids	11.9325	885	40
1240	35938	35973	aurea_xavier_fontaine	79370	2019	7	Femelle	1	Tetrapoda	Mammalia	Rodentia	Myomorpha	Muridae	mus	Mus_musculus	muroids	11.9325	885	40
1241	21486	21521	aya_anna_eozinou	49370	2016	8	Femelle	5	Tetrapoda	Aves	Passeriformes	Passeri	Prunellidae	prunella	Prunella_modularis	passeriforms	11.4765	746	46
1242	11475	11510	aya_anna_eozinou	49370	2016	3	Femelle	5	Tetrapoda	Aves	Passeriformes	Passeri	Turdidae	turdus	Turdus_philomelos	passeriforms	11.4765	746	46
1243	16957	16992	aya_anna_eozinou	49370	2016	6	Femelle	5	Tetrapoda	Aves	Aves_ord_fam_gen_sp	Aves_ord_fam_gen_sp	Aves_ord_fam_gen_sp	Aves_ord_fam_gen_sp	Aves_ord_fam_gen_sp	other_birds	11.4765	746	46
1244	19652	19687	aya_anna_eozinou	49370	2016	7	Femelle	5	Tetrapoda	Aves	Passeriformes	Passeri	Muscicapidae	phoenicurus	Phoenicurus_ochruros	passeriforms	11.4765	746	46
1245	21950	21985	aya_anna_eozinou	49370	2016	8	Femelle	5	Tetrapoda	Mammalia	Rodentia	Myomorpha	Cricetidae	arvicola	Arvicola_sp	cricetids	11.4765	746	46
1246	21487	21522	aya_anna_eozinou	49370	2016	8	Femelle	5	Tetrapoda	Mammalia	Rodentia	Myomorpha	Muridae	apodemus	Apodemus_sp	muroids	11.4765	746	46
1247	28196	28231	aya_anna_eozinou	49370	2017	6	Femelle	6	Tetrapoda	Mammalia	Eulipotyphla	Soricidae	Soricidae	Soricidae_gen_sp	Soricidae_gen_sp	soricids	11.5605	730	39
1248	4933	4955	aya_anna_eozinou	49370	2015	9	Femelle	4	Tetrapoda	Mammalia	Eulipotyphla	Soricidae	Soricidae	Soricidae_gen_sp	Soricidae_gen_sp	soricids	11.4765	746	46
1249	5352	5374	aya_anna_eozinou	49370	2015	10	Femelle	4	Tetrapoda	Mammalia	Eulipotyphla	Soricidae	Soricidae	Soricidae_gen_sp	Soricidae_gen_sp	soricids	11.4765	746	46
1250	5647	5669	aya_anna_eozinou	49370	2015	10	Femelle	4	Tetrapoda	Mammalia	Eulipotyphla	Soricidae	Soricidae	Soricidae_gen_sp	Soricidae_gen_sp	soricids	11.4765	746	46
1251	6066	6088	aya_anna_eozinou	49370	2015	10	Femelle	4	Tetrapoda	Mammalia	Eulipotyphla	Soricidae	Soricidae	Soricidae_gen_sp	Soricidae_gen_sp	soricids	11.4765	746	46
1252	8257	8284	aya_anna_eozinou	49370	2015	11	Femelle	4	Tetrapoda	Mammalia	Eulipotyphla	Soricidae	Soricidae	Soricidae_gen_sp	Soricidae_gen_sp	soricids	11.4765	746	46
1253	11019	11054	aya_anna_eozinou	49370	2016	2	Femelle	5	Tetrapoda	Mammalia	Eulipotyphla	Soricidae	Soricidae	Soricidae_gen_sp	Soricidae_gen_sp	soricids	11.4765	746	46
1254	12586	12621	aya_anna_eozinou	49370	2016	4	Femelle	5	Tetrapoda	Mammalia	Eulipotyphla	Soricidae	Soricidae	Soricidae_gen_sp	Soricidae_gen_sp	soricids	11.4765	746	46
1255	12587	12622	aya_anna_eozinou	49370	2016	4	Femelle	5	Tetrapoda	Mammalia	Eulipotyphla	Soricidae	Soricidae	Soricidae_gen_sp	Soricidae_gen_sp	soricids	11.4765	746	46
1256	14895	14930	aya_anna_eozinou	49370	2016	5	Femelle	5	Tetrapoda	Mammalia	Eulipotyphla	Soricidae	Soricidae	Soricidae_gen_sp	Soricidae_gen_sp	soricids	11.4765	746	46
1257	15084	15119	aya_anna_eozinou	49370	2016	5	Femelle	5	Tetrapoda	Mammalia	Eulipotyphla	Soricidae	Soricidae	Soricidae_gen_sp	Soricidae_gen_sp	soricids	11.4765	746	46
1258	16791	16826	aya_anna_eozinou	49370	2016	6	Femelle	5	Tetrapoda	Mammalia	Eulipotyphla	Soricidae	Soricidae	Soricidae_gen_sp	Soricidae_gen_sp	soricids	11.4765	746	46
1259	17322	17357	aya_anna_eozinou	49370	2016	6	Femelle	5	Tetrapoda	Mammalia	Eulipotyphla	Soricidae	Soricidae	Soricidae_gen_sp	Soricidae_gen_sp	soricids	11.4765	746	46
1260	17982	18017	aya_anna_eozinou	49370	2016	6	Femelle	5	Tetrapoda	Mammalia	Eulipotyphla	Soricidae	Soricidae	Soricidae_gen_sp	Soricidae_gen_sp	soricids	11.4765	746	46
1261	19544	19579	aya_anna_eozinou	49370	2016	7	Femelle	5	Tetrapoda	Mammalia	Eulipotyphla	Soricidae	Soricidae	Soricidae_gen_sp	Soricidae_gen_sp	soricids	11.4765	746	46
1262	20402	20437	aya_anna_eozinou	49370	2016	7	Femelle	5	Tetrapoda	Mammalia	Eulipotyphla	Soricidae	Soricidae	Soricidae_gen_sp	Soricidae_gen_sp	soricids	11.4765	746	46
1263	20795	20830	aya_anna_eozinou	49370	2016	7	Femelle	5	Tetrapoda	Mammalia	Eulipotyphla	Soricidae	Soricidae	Soricidae_gen_sp	Soricidae_gen_sp	soricids	11.4765	746	46
1264	20796	20831	aya_anna_eozinou	49370	2016	8	Femelle	5	Tetrapoda	Mammalia	Eulipotyphla	Soricidae	Soricidae	Soricidae_gen_sp	Soricidae_gen_sp	soricids	11.4765	746	46
1265	21149	21184	aya_anna_eozinou	49370	2016	8	Femelle	5	Tetrapoda	Mammalia	Eulipotyphla	Soricidae	Soricidae	Soricidae_gen_sp	Soricidae_gen_sp	soricids	11.4765	746	46
1266	21949	21984	aya_anna_eozinou	49370	2016	8	Femelle	5	Tetrapoda	Mammalia	Eulipotyphla	Soricidae	Soricidae	Soricidae_gen_sp	Soricidae_gen_sp	soricids	11.4765	746	46
1267	22397	22432	aya_anna_eozinou	49370	2016	9	Femelle	5	Tetrapoda	Mammalia	Eulipotyphla	Soricidae	Soricidae	Soricidae_gen_sp	Soricidae_gen_sp	soricids	11.4765	746	46
1268	24130	24165	aya_anna_eozinou	49370	2016	11	Femelle	5	Tetrapoda	Mammalia	Eulipotyphla	Soricidae	Soricidae	Soricidae_gen_sp	Soricidae_gen_sp	soricids	11.4765	746	46
1269	12265	12300	aya_anna_eozinou	49370	2016	4	Femelle	5	Tetrapoda	Mammalia	Rodentia	Myomorpha	Cricetidae	Cricetidae_gen_sp	Cricetidae_gen_sp	cricetids	11.4765	746	46
1270	7208	7235	aya_anna_eozinou	49370	2015	10	Femelle	4	Tetrapoda	Mammalia	Rodentia	Myomorpha	Muridae	rattus	Rattus_norvegicus	muroids	11.4765	746	46
1271	7806	7833	aya_anna_eozinou	49370	2015	11	Femelle	4	Tetrapoda	Mammalia	Rodentia	Myomorpha	Muridae	rattus	Rattus_norvegicus	muroids	11.4765	746	46
1272	14621	14656	aya_anna_eozinou	49370	2016	5	Femelle	5	Tetrapoda	Mammalia	Rodentia	Myomorpha	Muridae	mus	Mus_musculus	muroids	11.4765	746	46
1273	27314	27349	aya_anna_eozinou	49370	2017	4	Femelle	6	Tetrapoda	Mammalia	Eulipotyphla	Talpidae	Talpidae	talpa	Talpa_sp	other_mammals	11.5605	730	39
1274	27316	27351	aya_anna_eozinou	49370	2017	4	Femelle	6	Tetrapoda	Mammalia	Eulipotyphla	Talpidae	Talpidae	talpa	Talpa_sp	other_mammals	11.5605	730	39
1275	27319	27354	aya_anna_eozinou	49370	2017	5	Femelle	6	Tetrapoda	Mammalia	Eulipotyphla	Talpidae	Talpidae	talpa	Talpa_sp	other_mammals	11.5605	730	39
1276	27315	27350	aya_anna_eozinou	49370	2017	4	Femelle	6	Tetrapoda	Mammalia	Eulipotyphla	Talpidae	Talpidae	talpa	Talpa_sp	other_mammals	11.5605	730	39
1277	27318	27353	aya_anna_eozinou	49370	2017	5	Femelle	6	Tetrapoda	Mammalia	Eulipotyphla	Talpidae	Talpidae	talpa	Talpa_sp	other_mammals	11.5605	730	39
1278	27317	27352	aya_anna_eozinou	49370	2017	4	Femelle	6	Tetrapoda	Mammalia	Eulipotyphla	Talpidae	Talpidae	talpa	Talpa_sp	other_mammals	11.5605	730	39
1279	12677	12712	aya_anna_eozinou	49370	2016	4	Femelle	5	Tetrapoda	Mammalia	Eulipotyphla	Talpidae	Talpidae	talpa	Talpa_sp	other_mammals	11.4765	746	46
1280	17983	18018	aya_anna_eozinou	49370	2016	6	Femelle	5	Tetrapoda	Squamata	Squamata	Serpentes	Colubridae	zamenis	Zamenis_longissimus	other_squamata	11.4765	746	46
1281	28195	28230	aya_anna_eozinou	49370	2017	6	Femelle	6	Tetrapoda	Squamata	Squamata	Lacertilia	Lacertidae	podarcis	Podarcis_muralis	lacertilia	11.5605	730	39
1282	11606	11641	aya_anna_eozinou	49370	2016	3	Femelle	5	Tetrapoda	Squamata	Squamata	Lacertilia	Lacertidae	podarcis	Podarcis_muralis	lacertilia	11.4765	746	46
1283	21134	21169	aya_anna_eozinou	49370	2016	8	Femelle	5	Tetrapoda	Squamata	Squamata	Lacertilia	Lacertidae	podarcis	Podarcis_muralis	lacertilia	11.4765	746	46
1284	NA	NA	aya_frederique_santi	45160	2020	11	Male	0	Tetrapoda	Mammalia	Rodentia	Myomorpha	Muridae	mus	Mus_musculus	muroids	11.2627	637	81
1285	11292	11327	ayako_franck_lafay	71200	2016	3	Femelle	8	Tetrapoda	Aves	Passeriformes	Passeri	Aegithalidae	aegithalos	Aegithalos_caudatus	passeriforms	10.237	830	42
1286	372	394	ayako_franck_lafay	71200	2015	7	Femelle	7	Tetrapoda	Aves	Passeriformes	Passeri	Paridae	parus	Parus_major	passeriforms	10.237	830	42
1287	28644	28679	ayako_franck_lafay	71200	2017	6	Femelle	9	Tetrapoda	Mammalia	Rodentia	Myomorpha	Cricetidae	Cricetidae_gen_sp	Cricetidae_gen_sp	cricetids	10.237	830	42
1288	5513	5535	ayako_franck_lafay	71200	2015	10	Femelle	7	Tetrapoda	Mammalia	Rodentia	Myomorpha	Muroidea_fam_gen_sp	Muroidea_fam_gen_sp	Muroidea_fam_gen_sp	muroids	10.237	830	42
1289	283	305	ayako_franck_lafay	71200	2015	7	Femelle	7	Tetrapoda	Mammalia	Rodentia	Myomorpha	Muridae	apodemus	Apodemus_sp	muroids	10.237	830	42
1290	354	376	ayako_franck_lafay	71200	2015	7	Femelle	7	Tetrapoda	Mammalia	Rodentia	Myomorpha	Muridae	apodemus	Apodemus_sp	muroids	10.237	830	42
1291	755	777	ayako_franck_lafay	71200	2015	8	Femelle	7	Tetrapoda	Mammalia	Rodentia	Myomorpha	Muridae	apodemus	Apodemus_sp	muroids	10.237	830	42
1292	1030	1052	ayako_franck_lafay	71200	2015	8	Femelle	7	Tetrapoda	Mammalia	Rodentia	Myomorpha	Muridae	apodemus	Apodemus_sp	muroids	10.237	830	42
1293	3043	3065	ayako_franck_lafay	71200	2015	9	Femelle	7	Tetrapoda	Mammalia	Rodentia	Myomorpha	Muridae	apodemus	Apodemus_sp	muroids	10.237	830	42
1294	4276	4298	ayako_franck_lafay	71200	2015	9	Femelle	7	Tetrapoda	Mammalia	Rodentia	Myomorpha	Muridae	apodemus	Apodemus_sp	muroids	10.237	830	42
1295	4877	4899	ayako_franck_lafay	71200	2015	9	Femelle	7	Tetrapoda	Mammalia	Rodentia	Myomorpha	Muridae	apodemus	Apodemus_sp	muroids	10.237	830	42
1296	5518	5540	ayako_franck_lafay	71200	2015	10	Femelle	7	Tetrapoda	Mammalia	Rodentia	Myomorpha	Muridae	apodemus	Apodemus_sp	muroids	10.237	830	42
1297	5520	5542	ayako_franck_lafay	71200	2015	10	Femelle	7	Tetrapoda	Mammalia	Rodentia	Myomorpha	Muridae	apodemus	Apodemus_sp	muroids	10.237	830	42
1298	7216	7243	ayako_franck_lafay	71200	2015	10	Femelle	7	Tetrapoda	Mammalia	Rodentia	Myomorpha	Muridae	apodemus	Apodemus_sp	muroids	10.237	830	42
1299	7554	7581	ayako_franck_lafay	71200	2015	11	Femelle	7	Tetrapoda	Mammalia	Rodentia	Myomorpha	Muridae	apodemus	Apodemus_sp	muroids	10.237	830	42
1300	14617	14652	ayako_franck_lafay	71200	2016	5	Femelle	8	Tetrapoda	Mammalia	Rodentia	Myomorpha	Muridae	apodemus	Apodemus_sp	muroids	10.237	830	42
1301	14618	14653	ayako_franck_lafay	71200	2016	5	Femelle	8	Tetrapoda	Mammalia	Rodentia	Myomorpha	Muridae	apodemus	Apodemus_sp	muroids	10.237	830	42
1302	17573	17608	ayako_franck_lafay	71200	2016	6	Femelle	8	Tetrapoda	Mammalia	Rodentia	Myomorpha	Muridae	apodemus	Apodemus_sp	muroids	10.237	830	42
1303	22103	22138	ayako_franck_lafay	71200	2016	8	Femelle	8	Tetrapoda	Mammalia	Rodentia	Myomorpha	Muridae	apodemus	Apodemus_sp	muroids	10.237	830	42
1304	22106	22141	ayako_franck_lafay	71200	2016	8	Femelle	8	Tetrapoda	Mammalia	Rodentia	Myomorpha	Muridae	apodemus	Apodemus_sp	muroids	10.237	830	42
1305	22374	22409	ayako_franck_lafay	71200	2016	9	Femelle	8	Tetrapoda	Mammalia	Rodentia	Myomorpha	Muridae	apodemus	Apodemus_sp	muroids	10.237	830	42
1306	22375	22410	ayako_franck_lafay	71200	2016	9	Femelle	8	Tetrapoda	Mammalia	Rodentia	Myomorpha	Muridae	apodemus	Apodemus_sp	muroids	10.237	830	42
1307	22958	22993	ayako_franck_lafay	71200	2016	9	Femelle	8	Tetrapoda	Mammalia	Rodentia	Myomorpha	Muridae	apodemus	Apodemus_sp	muroids	10.237	830	42
1308	23791	23826	ayako_franck_lafay	71200	2016	10	Femelle	8	Tetrapoda	Mammalia	Rodentia	Myomorpha	Muridae	apodemus	Apodemus_sp	muroids	10.237	830	42
1309	24339	24374	ayako_franck_lafay	71200	2016	10	Femelle	8	Tetrapoda	Mammalia	Rodentia	Myomorpha	Muridae	apodemus	Apodemus_sp	muroids	10.237	830	42
1310	24340	24375	ayako_franck_lafay	71200	2016	11	Femelle	8	Tetrapoda	Mammalia	Rodentia	Myomorpha	Muridae	apodemus	Apodemus_sp	muroids	10.237	830	42
1311	24572	24607	ayako_franck_lafay	71200	2016	12	Femelle	8	Tetrapoda	Mammalia	Rodentia	Myomorpha	Muridae	apodemus	Apodemus_sp	muroids	10.237	830	42
1312	25934	25969	ayako_franck_lafay	71200	2017	1	Femelle	9	Tetrapoda	Mammalia	Rodentia	Myomorpha	Muridae	apodemus	Apodemus_sp	muroids	10.237	830	42
1313	27940	27975	ayako_franck_lafay	71200	2017	5	Femelle	9	Tetrapoda	Mammalia	Rodentia	Myomorpha	Muridae	apodemus	Apodemus_sp	muroids	10.237	830	42
1314	28645	28680	ayako_franck_lafay	71200	2017	6	Femelle	9	Tetrapoda	Mammalia	Rodentia	Myomorpha	Muridae	apodemus	Apodemus_sp	muroids	10.237	830	42
1315	28649	28684	ayako_franck_lafay	71200	2017	7	Femelle	9	Tetrapoda	Mammalia	Rodentia	Myomorpha	Muridae	apodemus	Apodemus_sp	muroids	10.237	830	42
1316	30298	30333	ayako_franck_lafay	71200	2017	7	Femelle	9	Tetrapoda	Mammalia	Rodentia	Myomorpha	Muridae	apodemus	Apodemus_sp	muroids	10.237	830	42
1317	30625	30660	ayako_franck_lafay	71200	2017	10	Femelle	9	Tetrapoda	Mammalia	Rodentia	Myomorpha	Muridae	apodemus	Apodemus_sp	muroids	10.237	830	42
1318	31086	31121	ayako_franck_lafay	71200	2017	12	Femelle	9	Tetrapoda	Mammalia	Rodentia	Myomorpha	Muridae	apodemus	Apodemus_sp	muroids	10.237	830	42
1319	15897	15932	ayako_franck_lafay	71200	2016	5	Femelle	8	Tetrapoda	Mammalia	Eulipotyphla	Soricidae	Soricidae	Soricidae_gen_sp	Soricidae_gen_sp	soricids	10.237	830	42
1320	18895	18930	ayako_franck_lafay	71200	2016	7	Femelle	8	Tetrapoda	Mammalia	Eulipotyphla	Soricidae	Soricidae	Soricidae_gen_sp	Soricidae_gen_sp	soricids	10.237	830	42
1321	26507	26542	ayako_franck_lafay	71200	2017	4	Femelle	9	Tetrapoda	Mammalia	Eulipotyphla	Soricidae	Soricidae	Soricidae_gen_sp	Soricidae_gen_sp	soricids	10.237	830	42
1322	27934	27969	ayako_franck_lafay	71200	2017	4	Femelle	9	Tetrapoda	Mammalia	Eulipotyphla	Soricidae	Soricidae	Soricidae_gen_sp	Soricidae_gen_sp	soricids	10.237	830	42
1323	24342	24377	ayako_franck_lafay	71200	2016	11	Femelle	8	Tetrapoda	Mammalia	Rodentia	Myomorpha	Cricetidae	Cricetidae_gen_sp	Cricetidae_gen_sp	cricetids	10.237	830	42
1324	24571	24606	ayako_franck_lafay	71200	2016	11	Femelle	8	Tetrapoda	Mammalia	Rodentia	Myomorpha	Cricetidae	Cricetidae_gen_sp	Cricetidae_gen_sp	cricetids	10.237	830	42
1325	24573	24608	ayako_franck_lafay	71200	2016	12	Femelle	8	Tetrapoda	Mammalia	Rodentia	Myomorpha	Cricetidae	Cricetidae_gen_sp	Cricetidae_gen_sp	cricetids	10.237	830	42
1326	436	458	ayako_franck_lafay	71200	2015	7	Femelle	7	Tetrapoda	Mammalia	Rodentia	Myomorpha	Muroidea_fam_gen_sp	Muroidea_fam_gen_sp	Muroidea_fam_gen_sp	muroids	10.237	830	42
1327	529	551	ayako_franck_lafay	71200	2015	8	Femelle	7	Tetrapoda	Mammalia	Rodentia	Myomorpha	Muroidea_fam_gen_sp	Muroidea_fam_gen_sp	Muroidea_fam_gen_sp	muroids	10.237	830	42
1328	551	573	ayako_franck_lafay	71200	2015	8	Femelle	7	Tetrapoda	Mammalia	Rodentia	Myomorpha	Muroidea_fam_gen_sp	Muroidea_fam_gen_sp	Muroidea_fam_gen_sp	muroids	10.237	830	42
1329	615	637	ayako_franck_lafay	71200	2015	8	Femelle	7	Tetrapoda	Mammalia	Rodentia	Myomorpha	Muroidea_fam_gen_sp	Muroidea_fam_gen_sp	Muroidea_fam_gen_sp	muroids	10.237	830	42
1330	665	687	ayako_franck_lafay	71200	2015	8	Femelle	7	Tetrapoda	Mammalia	Rodentia	Myomorpha	Muroidea_fam_gen_sp	Muroidea_fam_gen_sp	Muroidea_fam_gen_sp	muroids	10.237	830	42
1331	1029	1051	ayako_franck_lafay	71200	2015	8	Femelle	7	Tetrapoda	Mammalia	Rodentia	Myomorpha	Muroidea_fam_gen_sp	Muroidea_fam_gen_sp	Muroidea_fam_gen_sp	muroids	10.237	830	42
1332	3858	3880	ayako_franck_lafay	71200	2015	9	Femelle	7	Tetrapoda	Mammalia	Rodentia	Myomorpha	Muroidea_fam_gen_sp	Muroidea_fam_gen_sp	Muroidea_fam_gen_sp	muroids	10.237	830	42
1333	3859	3881	ayako_franck_lafay	71200	2015	9	Femelle	7	Tetrapoda	Mammalia	Rodentia	Myomorpha	Muroidea_fam_gen_sp	Muroidea_fam_gen_sp	Muroidea_fam_gen_sp	muroids	10.237	830	42
1334	4878	4900	ayako_franck_lafay	71200	2015	9	Femelle	7	Tetrapoda	Mammalia	Rodentia	Myomorpha	Muroidea_fam_gen_sp	Muroidea_fam_gen_sp	Muroidea_fam_gen_sp	muroids	10.237	830	42
1335	4937	4959	ayako_franck_lafay	71200	2015	9	Femelle	7	Tetrapoda	Mammalia	Rodentia	Myomorpha	Muroidea_fam_gen_sp	Muroidea_fam_gen_sp	Muroidea_fam_gen_sp	muroids	10.237	830	42
1336	5516	5538	ayako_franck_lafay	71200	2015	10	Femelle	7	Tetrapoda	Mammalia	Rodentia	Myomorpha	Muroidea_fam_gen_sp	Muroidea_fam_gen_sp	Muroidea_fam_gen_sp	muroids	10.237	830	42
1337	5519	5541	ayako_franck_lafay	71200	2015	10	Femelle	7	Tetrapoda	Mammalia	Rodentia	Myomorpha	Muroidea_fam_gen_sp	Muroidea_fam_gen_sp	Muroidea_fam_gen_sp	muroids	10.237	830	42
1338	6005	6027	ayako_franck_lafay	71200	2015	10	Femelle	7	Tetrapoda	Mammalia	Rodentia	Myomorpha	Muroidea_fam_gen_sp	Muroidea_fam_gen_sp	Muroidea_fam_gen_sp	muroids	10.237	830	42
1339	6055	6077	ayako_franck_lafay	71200	2015	10	Femelle	7	Tetrapoda	Mammalia	Rodentia	Myomorpha	Muroidea_fam_gen_sp	Muroidea_fam_gen_sp	Muroidea_fam_gen_sp	muroids	10.237	830	42
1340	6154	6176	ayako_franck_lafay	71200	2015	10	Femelle	7	Tetrapoda	Mammalia	Rodentia	Myomorpha	Muroidea_fam_gen_sp	Muroidea_fam_gen_sp	Muroidea_fam_gen_sp	muroids	10.237	830	42
1341	6155	6177	ayako_franck_lafay	71200	2015	10	Femelle	7	Tetrapoda	Mammalia	Rodentia	Myomorpha	Muroidea_fam_gen_sp	Muroidea_fam_gen_sp	Muroidea_fam_gen_sp	muroids	10.237	830	42
1342	6760	6787	ayako_franck_lafay	71200	2015	10	Femelle	7	Tetrapoda	Mammalia	Rodentia	Myomorpha	Muroidea_fam_gen_sp	Muroidea_fam_gen_sp	Muroidea_fam_gen_sp	muroids	10.237	830	42
1343	6761	6788	ayako_franck_lafay	71200	2015	10	Femelle	7	Tetrapoda	Mammalia	Rodentia	Myomorpha	Muroidea_fam_gen_sp	Muroidea_fam_gen_sp	Muroidea_fam_gen_sp	muroids	10.237	830	42
1344	7217	7244	ayako_franck_lafay	71200	2015	10	Femelle	7	Tetrapoda	Mammalia	Rodentia	Myomorpha	Muroidea_fam_gen_sp	Muroidea_fam_gen_sp	Muroidea_fam_gen_sp	muroids	10.237	830	42
1345	7218	7245	ayako_franck_lafay	71200	2015	10	Femelle	7	Tetrapoda	Mammalia	Rodentia	Myomorpha	Muroidea_fam_gen_sp	Muroidea_fam_gen_sp	Muroidea_fam_gen_sp	muroids	10.237	830	42
1346	7552	7579	ayako_franck_lafay	71200	2015	11	Femelle	7	Tetrapoda	Mammalia	Rodentia	Myomorpha	Muroidea_fam_gen_sp	Muroidea_fam_gen_sp	Muroidea_fam_gen_sp	muroids	10.237	830	42
1347	8128	8155	ayako_franck_lafay	71200	2015	11	Femelle	7	Tetrapoda	Mammalia	Rodentia	Myomorpha	Muroidea_fam_gen_sp	Muroidea_fam_gen_sp	Muroidea_fam_gen_sp	muroids	10.237	830	42
1348	9400	9427	ayako_franck_lafay	71200	2015	12	Femelle	7	Tetrapoda	Mammalia	Rodentia	Myomorpha	Muroidea_fam_gen_sp	Muroidea_fam_gen_sp	Muroidea_fam_gen_sp	muroids	10.237	830	42
1349	9683	9710	ayako_franck_lafay	71200	2016	1	Femelle	8	Tetrapoda	Mammalia	Rodentia	Myomorpha	Muroidea_fam_gen_sp	Muroidea_fam_gen_sp	Muroidea_fam_gen_sp	muroids	10.237	830	42
1350	9684	9711	ayako_franck_lafay	71200	2016	1	Femelle	8	Tetrapoda	Mammalia	Rodentia	Myomorpha	Muroidea_fam_gen_sp	Muroidea_fam_gen_sp	Muroidea_fam_gen_sp	muroids	10.237	830	42
1351	10194	10229	ayako_franck_lafay	71200	2016	1	Femelle	8	Tetrapoda	Mammalia	Rodentia	Myomorpha	Muroidea_fam_gen_sp	Muroidea_fam_gen_sp	Muroidea_fam_gen_sp	muroids	10.237	830	42
1352	10673	10708	ayako_franck_lafay	71200	2016	2	Femelle	8	Tetrapoda	Mammalia	Rodentia	Myomorpha	Muroidea_fam_gen_sp	Muroidea_fam_gen_sp	Muroidea_fam_gen_sp	muroids	10.237	830	42
1353	10946	10981	ayako_franck_lafay	71200	2016	2	Femelle	8	Tetrapoda	Mammalia	Rodentia	Myomorpha	Muroidea_fam_gen_sp	Muroidea_fam_gen_sp	Muroidea_fam_gen_sp	muroids	10.237	830	42
1354	10947	10982	ayako_franck_lafay	71200	2016	2	Femelle	8	Tetrapoda	Mammalia	Rodentia	Myomorpha	Muroidea_fam_gen_sp	Muroidea_fam_gen_sp	Muroidea_fam_gen_sp	muroids	10.237	830	42
1355	10991	11026	ayako_franck_lafay	71200	2016	2	Femelle	8	Tetrapoda	Mammalia	Rodentia	Myomorpha	Muroidea_fam_gen_sp	Muroidea_fam_gen_sp	Muroidea_fam_gen_sp	muroids	10.237	830	42
1356	11214	11249	ayako_franck_lafay	71200	2016	3	Femelle	8	Tetrapoda	Mammalia	Rodentia	Myomorpha	Muroidea_fam_gen_sp	Muroidea_fam_gen_sp	Muroidea_fam_gen_sp	muroids	10.237	830	42
1357	12211	12246	ayako_franck_lafay	71200	2016	4	Femelle	8	Tetrapoda	Mammalia	Rodentia	Myomorpha	Muroidea_fam_gen_sp	Muroidea_fam_gen_sp	Muroidea_fam_gen_sp	muroids	10.237	830	42
1358	12277	12312	ayako_franck_lafay	71200	2016	4	Femelle	8	Tetrapoda	Mammalia	Rodentia	Myomorpha	Muroidea_fam_gen_sp	Muroidea_fam_gen_sp	Muroidea_fam_gen_sp	muroids	10.237	830	42
1359	12560	12595	ayako_franck_lafay	71200	2016	4	Femelle	8	Tetrapoda	Mammalia	Rodentia	Myomorpha	Muroidea_fam_gen_sp	Muroidea_fam_gen_sp	Muroidea_fam_gen_sp	muroids	10.237	830	42
1360	14936	14971	ayako_franck_lafay	71200	2016	5	Femelle	8	Tetrapoda	Mammalia	Rodentia	Myomorpha	Muroidea_fam_gen_sp	Muroidea_fam_gen_sp	Muroidea_fam_gen_sp	muroids	10.237	830	42
1361	15896	15931	ayako_franck_lafay	71200	2016	5	Femelle	8	Tetrapoda	Mammalia	Rodentia	Myomorpha	Muroidea_fam_gen_sp	Muroidea_fam_gen_sp	Muroidea_fam_gen_sp	muroids	10.237	830	42
1362	16486	16521	ayako_franck_lafay	71200	2016	5	Femelle	8	Tetrapoda	Mammalia	Rodentia	Myomorpha	Muroidea_fam_gen_sp	Muroidea_fam_gen_sp	Muroidea_fam_gen_sp	muroids	10.237	830	42
1363	16487	16522	ayako_franck_lafay	71200	2016	5	Femelle	8	Tetrapoda	Mammalia	Rodentia	Myomorpha	Muroidea_fam_gen_sp	Muroidea_fam_gen_sp	Muroidea_fam_gen_sp	muroids	10.237	830	42
1364	16488	16523	ayako_franck_lafay	71200	2016	5	Femelle	8	Tetrapoda	Mammalia	Rodentia	Myomorpha	Muroidea_fam_gen_sp	Muroidea_fam_gen_sp	Muroidea_fam_gen_sp	muroids	10.237	830	42
1365	17574	17609	ayako_franck_lafay	71200	2016	6	Femelle	8	Tetrapoda	Mammalia	Rodentia	Myomorpha	Muroidea_fam_gen_sp	Muroidea_fam_gen_sp	Muroidea_fam_gen_sp	muroids	10.237	830	42
1366	18892	18927	ayako_franck_lafay	71200	2016	6	Femelle	8	Tetrapoda	Mammalia	Rodentia	Myomorpha	Muroidea_fam_gen_sp	Muroidea_fam_gen_sp	Muroidea_fam_gen_sp	muroids	10.237	830	42
1367	18896	18931	ayako_franck_lafay	71200	2016	7	Femelle	8	Tetrapoda	Mammalia	Rodentia	Myomorpha	Muroidea_fam_gen_sp	Muroidea_fam_gen_sp	Muroidea_fam_gen_sp	muroids	10.237	830	42
1368	20025	20060	ayako_franck_lafay	71200	2016	7	Femelle	8	Tetrapoda	Mammalia	Rodentia	Myomorpha	Muroidea_fam_gen_sp	Muroidea_fam_gen_sp	Muroidea_fam_gen_sp	muroids	10.237	830	42
1369	20026	20061	ayako_franck_lafay	71200	2016	7	Femelle	8	Tetrapoda	Mammalia	Rodentia	Myomorpha	Muroidea_fam_gen_sp	Muroidea_fam_gen_sp	Muroidea_fam_gen_sp	muroids	10.237	830	42
1370	20027	20062	ayako_franck_lafay	71200	2016	7	Femelle	8	Tetrapoda	Mammalia	Rodentia	Myomorpha	Muroidea_fam_gen_sp	Muroidea_fam_gen_sp	Muroidea_fam_gen_sp	muroids	10.237	830	42
1371	20247	20282	ayako_franck_lafay	71200	2016	7	Femelle	8	Tetrapoda	Mammalia	Rodentia	Myomorpha	Muroidea_fam_gen_sp	Muroidea_fam_gen_sp	Muroidea_fam_gen_sp	muroids	10.237	830	42
1372	20331	20366	ayako_franck_lafay	71200	2016	7	Femelle	8	Tetrapoda	Mammalia	Rodentia	Myomorpha	Muroidea_fam_gen_sp	Muroidea_fam_gen_sp	Muroidea_fam_gen_sp	muroids	10.237	830	42
1373	20333	20368	ayako_franck_lafay	71200	2016	7	Femelle	8	Tetrapoda	Mammalia	Rodentia	Myomorpha	Muroidea_fam_gen_sp	Muroidea_fam_gen_sp	Muroidea_fam_gen_sp	muroids	10.237	830	42
1374	21665	21700	ayako_franck_lafay	71200	2016	8	Femelle	8	Tetrapoda	Mammalia	Rodentia	Myomorpha	Muroidea_fam_gen_sp	Muroidea_fam_gen_sp	Muroidea_fam_gen_sp	muroids	10.237	830	42
1375	21669	21704	ayako_franck_lafay	71200	2016	8	Femelle	8	Tetrapoda	Mammalia	Rodentia	Myomorpha	Muroidea_fam_gen_sp	Muroidea_fam_gen_sp	Muroidea_fam_gen_sp	muroids	10.237	830	42
1376	21670	21705	ayako_franck_lafay	71200	2016	8	Femelle	8	Tetrapoda	Mammalia	Rodentia	Myomorpha	Muroidea_fam_gen_sp	Muroidea_fam_gen_sp	Muroidea_fam_gen_sp	muroids	10.237	830	42
1377	22105	22140	ayako_franck_lafay	71200	2016	8	Femelle	8	Tetrapoda	Mammalia	Rodentia	Myomorpha	Muroidea_fam_gen_sp	Muroidea_fam_gen_sp	Muroidea_fam_gen_sp	muroids	10.237	830	42
1378	22629	22664	ayako_franck_lafay	71200	2016	9	Femelle	8	Tetrapoda	Mammalia	Rodentia	Myomorpha	Muroidea_fam_gen_sp	Muroidea_fam_gen_sp	Muroidea_fam_gen_sp	muroids	10.237	830	42
1379	22630	22665	ayako_franck_lafay	71200	2016	9	Femelle	8	Tetrapoda	Mammalia	Rodentia	Myomorpha	Muroidea_fam_gen_sp	Muroidea_fam_gen_sp	Muroidea_fam_gen_sp	muroids	10.237	830	42
1380	22960	22995	ayako_franck_lafay	71200	2016	9	Femelle	8	Tetrapoda	Mammalia	Rodentia	Myomorpha	Muroidea_fam_gen_sp	Muroidea_fam_gen_sp	Muroidea_fam_gen_sp	muroids	10.237	830	42
1381	22966	23001	ayako_franck_lafay	71200	2016	9	Femelle	8	Tetrapoda	Mammalia	Rodentia	Myomorpha	Muroidea_fam_gen_sp	Muroidea_fam_gen_sp	Muroidea_fam_gen_sp	muroids	10.237	830	42
1382	23175	23210	ayako_franck_lafay	71200	2016	9	Femelle	8	Tetrapoda	Mammalia	Rodentia	Myomorpha	Muroidea_fam_gen_sp	Muroidea_fam_gen_sp	Muroidea_fam_gen_sp	muroids	10.237	830	42
1383	23317	23352	ayako_franck_lafay	71200	2016	10	Femelle	8	Tetrapoda	Mammalia	Rodentia	Myomorpha	Muroidea_fam_gen_sp	Muroidea_fam_gen_sp	Muroidea_fam_gen_sp	muroids	10.237	830	42
1384	23451	23486	ayako_franck_lafay	71200	2016	10	Femelle	8	Tetrapoda	Mammalia	Rodentia	Myomorpha	Muroidea_fam_gen_sp	Muroidea_fam_gen_sp	Muroidea_fam_gen_sp	muroids	10.237	830	42
1385	23452	23487	ayako_franck_lafay	71200	2016	10	Femelle	8	Tetrapoda	Mammalia	Rodentia	Myomorpha	Muroidea_fam_gen_sp	Muroidea_fam_gen_sp	Muroidea_fam_gen_sp	muroids	10.237	830	42
1386	23796	23831	ayako_franck_lafay	71200	2016	10	Femelle	8	Tetrapoda	Mammalia	Rodentia	Myomorpha	Muroidea_fam_gen_sp	Muroidea_fam_gen_sp	Muroidea_fam_gen_sp	muroids	10.237	830	42
1387	23797	23832	ayako_franck_lafay	71200	2016	10	Femelle	8	Tetrapoda	Mammalia	Rodentia	Myomorpha	Muroidea_fam_gen_sp	Muroidea_fam_gen_sp	Muroidea_fam_gen_sp	muroids	10.237	830	42
1388	24228	24263	ayako_franck_lafay	71200	2016	11	Femelle	8	Tetrapoda	Mammalia	Rodentia	Myomorpha	Muroidea_fam_gen_sp	Muroidea_fam_gen_sp	Muroidea_fam_gen_sp	muroids	10.237	830	42
1389	24229	24264	ayako_franck_lafay	71200	2016	11	Femelle	8	Tetrapoda	Mammalia	Rodentia	Myomorpha	Muroidea_fam_gen_sp	Muroidea_fam_gen_sp	Muroidea_fam_gen_sp	muroids	10.237	830	42
1390	24230	24265	ayako_franck_lafay	71200	2016	11	Femelle	8	Tetrapoda	Mammalia	Rodentia	Myomorpha	Muroidea_fam_gen_sp	Muroidea_fam_gen_sp	Muroidea_fam_gen_sp	muroids	10.237	830	42
1391	24338	24373	ayako_franck_lafay	71200	2016	11	Femelle	8	Tetrapoda	Mammalia	Rodentia	Myomorpha	Muroidea_fam_gen_sp	Muroidea_fam_gen_sp	Muroidea_fam_gen_sp	muroids	10.237	830	42
1392	24341	24376	ayako_franck_lafay	71200	2016	11	Femelle	8	Tetrapoda	Mammalia	Rodentia	Myomorpha	Muroidea_fam_gen_sp	Muroidea_fam_gen_sp	Muroidea_fam_gen_sp	muroids	10.237	830	42
1393	24766	24801	ayako_franck_lafay	71200	2016	12	Femelle	8	Tetrapoda	Mammalia	Rodentia	Myomorpha	Muroidea_fam_gen_sp	Muroidea_fam_gen_sp	Muroidea_fam_gen_sp	muroids	10.237	830	42
1394	25935	25970	ayako_franck_lafay	71200	2017	2	Femelle	9	Tetrapoda	Mammalia	Rodentia	Myomorpha	Muroidea_fam_gen_sp	Muroidea_fam_gen_sp	Muroidea_fam_gen_sp	muroids	10.237	830	42
1395	25936	25971	ayako_franck_lafay	71200	2017	2	Femelle	9	Tetrapoda	Mammalia	Rodentia	Myomorpha	Muroidea_fam_gen_sp	Muroidea_fam_gen_sp	Muroidea_fam_gen_sp	muroids	10.237	830	42
1396	26503	26538	ayako_franck_lafay	71200	2017	3	Femelle	9	Tetrapoda	Mammalia	Rodentia	Myomorpha	Muroidea_fam_gen_sp	Muroidea_fam_gen_sp	Muroidea_fam_gen_sp	muroids	10.237	830	42
1397	26504	26539	ayako_franck_lafay	71200	2017	3	Femelle	9	Tetrapoda	Mammalia	Rodentia	Myomorpha	Muroidea_fam_gen_sp	Muroidea_fam_gen_sp	Muroidea_fam_gen_sp	muroids	10.237	830	42
1398	26506	26541	ayako_franck_lafay	71200	2017	3	Femelle	9	Tetrapoda	Mammalia	Rodentia	Myomorpha	Muroidea_fam_gen_sp	Muroidea_fam_gen_sp	Muroidea_fam_gen_sp	muroids	10.237	830	42
1399	27936	27971	ayako_franck_lafay	71200	2017	5	Femelle	9	Tetrapoda	Mammalia	Rodentia	Myomorpha	Muroidea_fam_gen_sp	Muroidea_fam_gen_sp	Muroidea_fam_gen_sp	muroids	10.237	830	42
1400	27937	27972	ayako_franck_lafay	71200	2017	5	Femelle	9	Tetrapoda	Mammalia	Rodentia	Myomorpha	Muroidea_fam_gen_sp	Muroidea_fam_gen_sp	Muroidea_fam_gen_sp	muroids	10.237	830	42
1401	28627	28662	ayako_franck_lafay	71200	2017	5	Femelle	9	Tetrapoda	Mammalia	Rodentia	Myomorpha	Muroidea_fam_gen_sp	Muroidea_fam_gen_sp	Muroidea_fam_gen_sp	muroids	10.237	830	42
1402	28628	28663	ayako_franck_lafay	71200	2017	5	Femelle	9	Tetrapoda	Mammalia	Rodentia	Myomorpha	Muroidea_fam_gen_sp	Muroidea_fam_gen_sp	Muroidea_fam_gen_sp	muroids	10.237	830	42
1403	28629	28664	ayako_franck_lafay	71200	2017	5	Femelle	9	Tetrapoda	Mammalia	Rodentia	Myomorpha	Muroidea_fam_gen_sp	Muroidea_fam_gen_sp	Muroidea_fam_gen_sp	muroids	10.237	830	42
1404	28631	28666	ayako_franck_lafay	71200	2017	6	Femelle	9	Tetrapoda	Mammalia	Rodentia	Myomorpha	Muroidea_fam_gen_sp	Muroidea_fam_gen_sp	Muroidea_fam_gen_sp	muroids	10.237	830	42
1405	28634	28669	ayako_franck_lafay	71200	2017	6	Femelle	9	Tetrapoda	Mammalia	Rodentia	Myomorpha	Muroidea_fam_gen_sp	Muroidea_fam_gen_sp	Muroidea_fam_gen_sp	muroids	10.237	830	42
1406	28637	28672	ayako_franck_lafay	71200	2017	6	Femelle	9	Tetrapoda	Mammalia	Rodentia	Myomorpha	Muroidea_fam_gen_sp	Muroidea_fam_gen_sp	Muroidea_fam_gen_sp	muroids	10.237	830	42
1407	28642	28677	ayako_franck_lafay	71200	2017	6	Femelle	9	Tetrapoda	Mammalia	Rodentia	Myomorpha	Muroidea_fam_gen_sp	Muroidea_fam_gen_sp	Muroidea_fam_gen_sp	muroids	10.237	830	42
1408	30292	30327	ayako_franck_lafay	71200	2017	7	Femelle	9	Tetrapoda	Mammalia	Rodentia	Myomorpha	Muroidea_fam_gen_sp	Muroidea_fam_gen_sp	Muroidea_fam_gen_sp	muroids	10.237	830	42
1409	30293	30328	ayako_franck_lafay	71200	2017	7	Femelle	9	Tetrapoda	Mammalia	Rodentia	Myomorpha	Muroidea_fam_gen_sp	Muroidea_fam_gen_sp	Muroidea_fam_gen_sp	muroids	10.237	830	42
1410	30294	30329	ayako_franck_lafay	71200	2017	7	Femelle	9	Tetrapoda	Mammalia	Rodentia	Myomorpha	Muroidea_fam_gen_sp	Muroidea_fam_gen_sp	Muroidea_fam_gen_sp	muroids	10.237	830	42
1411	30297	30332	ayako_franck_lafay	71200	2017	7	Femelle	9	Tetrapoda	Mammalia	Rodentia	Myomorpha	Muroidea_fam_gen_sp	Muroidea_fam_gen_sp	Muroidea_fam_gen_sp	muroids	10.237	830	42
1412	30303	30338	ayako_franck_lafay	71200	2017	8	Femelle	9	Tetrapoda	Mammalia	Rodentia	Myomorpha	Muroidea_fam_gen_sp	Muroidea_fam_gen_sp	Muroidea_fam_gen_sp	muroids	10.237	830	42
1413	30304	30339	ayako_franck_lafay	71200	2017	9	Femelle	9	Tetrapoda	Mammalia	Rodentia	Myomorpha	Muroidea_fam_gen_sp	Muroidea_fam_gen_sp	Muroidea_fam_gen_sp	muroids	10.237	830	42
1414	30305	30340	ayako_franck_lafay	71200	2017	9	Femelle	9	Tetrapoda	Mammalia	Rodentia	Myomorpha	Muroidea_fam_gen_sp	Muroidea_fam_gen_sp	Muroidea_fam_gen_sp	muroids	10.237	830	42
1415	30306	30341	ayako_franck_lafay	71200	2017	9	Femelle	9	Tetrapoda	Mammalia	Rodentia	Myomorpha	Muroidea_fam_gen_sp	Muroidea_fam_gen_sp	Muroidea_fam_gen_sp	muroids	10.237	830	42
1416	30308	30343	ayako_franck_lafay	71200	2017	9	Femelle	9	Tetrapoda	Mammalia	Rodentia	Myomorpha	Muroidea_fam_gen_sp	Muroidea_fam_gen_sp	Muroidea_fam_gen_sp	muroids	10.237	830	42
1417	30310	30345	ayako_franck_lafay	71200	2017	9	Femelle	9	Tetrapoda	Mammalia	Rodentia	Myomorpha	Muroidea_fam_gen_sp	Muroidea_fam_gen_sp	Muroidea_fam_gen_sp	muroids	10.237	830	42
1418	30311	30346	ayako_franck_lafay	71200	2017	9	Femelle	9	Tetrapoda	Mammalia	Rodentia	Myomorpha	Muroidea_fam_gen_sp	Muroidea_fam_gen_sp	Muroidea_fam_gen_sp	muroids	10.237	830	42
1419	30312	30347	ayako_franck_lafay	71200	2017	10	Femelle	9	Tetrapoda	Mammalia	Rodentia	Myomorpha	Muroidea_fam_gen_sp	Muroidea_fam_gen_sp	Muroidea_fam_gen_sp	muroids	10.237	830	42
1420	30623	30658	ayako_franck_lafay	71200	2017	10	Femelle	9	Tetrapoda	Mammalia	Rodentia	Myomorpha	Muroidea_fam_gen_sp	Muroidea_fam_gen_sp	Muroidea_fam_gen_sp	muroids	10.237	830	42
1421	31082	31117	ayako_franck_lafay	71200	2017	11	Femelle	9	Tetrapoda	Mammalia	Rodentia	Myomorpha	Muroidea_fam_gen_sp	Muroidea_fam_gen_sp	Muroidea_fam_gen_sp	muroids	10.237	830	42
1422	31083	31118	ayako_franck_lafay	71200	2017	11	Femelle	9	Tetrapoda	Mammalia	Rodentia	Myomorpha	Muroidea_fam_gen_sp	Muroidea_fam_gen_sp	Muroidea_fam_gen_sp	muroids	10.237	830	42
1423	31084	31119	ayako_franck_lafay	71200	2017	11	Femelle	9	Tetrapoda	Mammalia	Rodentia	Myomorpha	Muroidea_fam_gen_sp	Muroidea_fam_gen_sp	Muroidea_fam_gen_sp	muroids	10.237	830	42
1424	31085	31120	ayako_franck_lafay	71200	2017	12	Femelle	9	Tetrapoda	Mammalia	Rodentia	Myomorpha	Muroidea_fam_gen_sp	Muroidea_fam_gen_sp	Muroidea_fam_gen_sp	muroids	10.237	830	42
1425	27933	27968	ayako_franck_lafay	71200	2017	4	Femelle	9	Tetrapoda	Mammalia	Eulipotyphla	Talpidae	Talpidae	talpa	Talpa_sp	other_mammals	10.237	830	42
1426	3253	3275	ayako_franck_lafay	71200	2015	9	Femelle	7	Tetrapoda	Squamata	Squamata	Lacertilia	Anguidae	anguis	Anguis_fragilis	lacertilia	10.237	830	42
1427	26078	26113	azathot_camille_resseguier	91300	2017	3	Male	6	Tetrapoda	Mammalia	Eulipotyphla	Soricidae	Soricidae	sorex	Sorex_araneus	soricids	11.2998	631	93
1428	26175	26210	azathot_camille_resseguier	91300	2017	3	Male	6	Tetrapoda	Mammalia	Eulipotyphla	Soricidae	Soricidae	sorex	Sorex_araneus	soricids	11.2998	631	93
1429	26211	26246	azathot_camille_resseguier	91300	2017	3	Male	6	Tetrapoda	Mammalia	Eulipotyphla	Soricidae	Soricidae	sorex	Sorex_araneus	soricids	11.2998	631	93
1430	26483	26518	azathot_camille_resseguier	91300	2017	4	Male	6	Tetrapoda	Mammalia	Eulipotyphla	Soricidae	Soricidae	sorex	Sorex_araneus	soricids	11.2998	631	93
1431	27625	27660	azathot_camille_resseguier	91300	2017	5	Male	6	Tetrapoda	Mammalia	Eulipotyphla	Soricidae	Soricidae	sorex	Sorex_araneus	soricids	11.2998	631	93
1432	28348	28383	azathot_camille_resseguier	91300	2017	6	Male	6	Tetrapoda	Mammalia	Eulipotyphla	Soricidae	Soricidae	sorex	Sorex_araneus	soricids	11.2998	631	93
1433	28055	28090	azathot_camille_resseguier	91300	2017	6	Male	6	Tetrapoda	Mammalia	Rodentia	Myomorpha	Muridae	mus	Mus_musculus	muroids	11.2998	631	93
1434	28496	28531	azathot_camille_resseguier	91300	2017	6	Male	6	Tetrapoda	Mammalia	Rodentia	Myomorpha	Muridae	mus	Mus_musculus	muroids	11.2998	631	93
1435	NA	NA	azel_amandine_dubernet	24460	2021	8	Femelle	0	Tetrapoda	Mammalia	Rodentia	Myomorpha	Muroidea_fam_gen_sp	Muroidea_fam_gen_sp	Muroidea_fam_gen_sp	muroids	12.3883	976	60
1436	21677	21712	azur_ric_desflaches	14210	2016	8	Male	9	Tetrapoda	Mammalia	Rodentia	Myomorpha	Cricetidae	microtus	Microtus_arvalis	cricetids	10.9824	765	57
1437	21723	21758	azur_ric_desflaches	14210	2016	8	Male	9	Tetrapoda	Mammalia	Rodentia	Myomorpha	Cricetidae	microtus	Microtus_arvalis	cricetids	10.9824	765	57
1438	11016	11051	azur_ric_desflaches	14210	2016	2	Male	9	Tetrapoda	Mammalia	Rodentia	Myomorpha	Cricetidae	microtus	Microtus_arvalis	cricetids	10.7994	789	56
1439	13767	13802	azur_ric_desflaches	14210	2016	4	Male	9	Tetrapoda	Mammalia	Rodentia	Myomorpha	Cricetidae	microtus	Microtus_arvalis	cricetids	10.7994	789	56
1440	17543	17578	azur_ric_desflaches	14210	2016	6	Male	9	Tetrapoda	Mammalia	Rodentia	Myomorpha	Cricetidae	microtus	Microtus_arvalis	cricetids	10.7994	789	56
1441	18283	18318	azur_ric_desflaches	14210	2016	6	Male	9	Tetrapoda	Mammalia	Rodentia	Myomorpha	Cricetidae	microtus	Microtus_arvalis	cricetids	10.7994	789	56
1442	16365	16400	azur_ric_desflaches	14210	2016	5	Male	9	Tetrapoda	Mammalia	Rodentia	Myomorpha	Cricetidae	Cricetidae_gen_sp	Cricetidae_gen_sp	cricetids	10.7994	789	56
1443	7801	7828	azur_ric_desflaches	14210	2015	11	Male	8	Tetrapoda	Mammalia	Chiroptera	Chiroptera_fam_gen_sp	Chiroptera_fam_gen_sp	Chiroptera_fam_gen_sp	Chiroptera_fam_gen_sp	other_mammals	10.7994	789	56
1444	5805	5827	azur_ric_desflaches	14210	2015	10	Male	8	Tetrapoda	Mammalia	Rodentia	Myomorpha	Cricetidae	arvicola	Arvicola_sp	cricetids	10.7994	789	56
1445	11074	11109	azur_ric_desflaches	14210	2016	3	Male	9	Tetrapoda	Mammalia	Lagomorpha	Leporidae	Leporidae	oryctolagus	Oryctolagus_cuniculus	other_mammals	10.7994	789	56
1446	11507	11542	azur_ric_desflaches	14210	2016	3	Male	9	Tetrapoda	Mammalia	Rodentia	Myomorpha	Cricetidae	Cricetidae_gen_sp	Cricetidae_gen_sp	cricetids	10.7994	789	56
1447	18284	18319	azur_ric_desflaches	14210	2016	6	Male	9	Tetrapoda	Mammalia	Rodentia	Myomorpha	Cricetidae	Cricetidae_gen_sp	Cricetidae_gen_sp	cricetids	10.7994	789	56
1448	21720	21755	azur_ric_desflaches	14210	2016	8	Male	9	Tetrapoda	Mammalia	Rodentia	Myomorpha	Muroidea_fam_gen_sp	Muroidea_fam_gen_sp	Muroidea_fam_gen_sp	muroids	10.9824	765	57
1449	22166	22201	azur_ric_desflaches	14210	2016	9	Male	9	Tetrapoda	Mammalia	Rodentia	Myomorpha	Muroidea_fam_gen_sp	Muroidea_fam_gen_sp	Muroidea_fam_gen_sp	muroids	10.9824	765	57
1450	5372	5394	azur_ric_desflaches	14210	2015	10	Male	8	Tetrapoda	Mammalia	Rodentia	Myomorpha	Muroidea_fam_gen_sp	Muroidea_fam_gen_sp	Muroidea_fam_gen_sp	muroids	10.7994	789	56
1451	5783	5805	azur_ric_desflaches	14210	2015	10	Male	8	Tetrapoda	Mammalia	Rodentia	Myomorpha	Muroidea_fam_gen_sp	Muroidea_fam_gen_sp	Muroidea_fam_gen_sp	muroids	10.7994	789	56
1452	6352	6374	azur_ric_desflaches	14210	2015	10	Male	8	Tetrapoda	Mammalia	Rodentia	Myomorpha	Muroidea_fam_gen_sp	Muroidea_fam_gen_sp	Muroidea_fam_gen_sp	muroids	10.7994	789	56
1453	7052	7079	azur_ric_desflaches	14210	2015	10	Male	8	Tetrapoda	Mammalia	Rodentia	Myomorpha	Muroidea_fam_gen_sp	Muroidea_fam_gen_sp	Muroidea_fam_gen_sp	muroids	10.7994	789	56
1454	7053	7080	azur_ric_desflaches	14210	2015	10	Male	8	Tetrapoda	Mammalia	Rodentia	Myomorpha	Muroidea_fam_gen_sp	Muroidea_fam_gen_sp	Muroidea_fam_gen_sp	muroids	10.7994	789	56
1455	7883	7910	azur_ric_desflaches	14210	2015	11	Male	8	Tetrapoda	Mammalia	Rodentia	Myomorpha	Muroidea_fam_gen_sp	Muroidea_fam_gen_sp	Muroidea_fam_gen_sp	muroids	10.7994	789	56
1456	9079	9106	azur_ric_desflaches	14210	2015	12	Male	8	Tetrapoda	Mammalia	Rodentia	Myomorpha	Muroidea_fam_gen_sp	Muroidea_fam_gen_sp	Muroidea_fam_gen_sp	muroids	10.7994	789	56
1457	10526	10561	azur_ric_desflaches	14210	2016	2	Male	9	Tetrapoda	Mammalia	Rodentia	Myomorpha	Muroidea_fam_gen_sp	Muroidea_fam_gen_sp	Muroidea_fam_gen_sp	muroids	10.7994	789	56
1458	10769	10804	azur_ric_desflaches	14210	2016	2	Male	9	Tetrapoda	Mammalia	Rodentia	Myomorpha	Muroidea_fam_gen_sp	Muroidea_fam_gen_sp	Muroidea_fam_gen_sp	muroids	10.7994	789	56
1459	11015	11050	azur_ric_desflaches	14210	2016	2	Male	9	Tetrapoda	Mammalia	Rodentia	Myomorpha	Muroidea_fam_gen_sp	Muroidea_fam_gen_sp	Muroidea_fam_gen_sp	muroids	10.7994	789	56
1460	11344	11379	azur_ric_desflaches	14210	2016	3	Male	9	Tetrapoda	Mammalia	Rodentia	Myomorpha	Muroidea_fam_gen_sp	Muroidea_fam_gen_sp	Muroidea_fam_gen_sp	muroids	10.7994	789	56
1461	15303	15338	azur_ric_desflaches	14210	2016	5	Male	9	Tetrapoda	Mammalia	Rodentia	Myomorpha	Muroidea_fam_gen_sp	Muroidea_fam_gen_sp	Muroidea_fam_gen_sp	muroids	10.7994	789	56
1462	18092	18127	azur_ric_desflaches	14210	2016	6	Male	9	Tetrapoda	Mammalia	Rodentia	Myomorpha	Muroidea_fam_gen_sp	Muroidea_fam_gen_sp	Muroidea_fam_gen_sp	muroids	10.7994	789	56
1463	18711	18746	azur_ric_desflaches	14210	2016	6	Male	9	Tetrapoda	Mammalia	Rodentia	Myomorpha	Muroidea_fam_gen_sp	Muroidea_fam_gen_sp	Muroidea_fam_gen_sp	muroids	10.7994	789	56
1464	22165	22200	azur_ric_desflaches	14210	2016	9	Male	9	Tetrapoda	Mammalia	Rodentia	Myomorpha	Muridae	micromys	Micromys_minutus	muroids	10.9824	765	57
1465	7050	7077	azur_ric_desflaches	14210	2015	10	Male	8	Tetrapoda	Mammalia	Rodentia	Myomorpha	Muridae	micromys	Micromys_minutus	muroids	10.7994	789	56
1466	7885	7912	azur_ric_desflaches	14210	2015	11	Male	8	Tetrapoda	Mammalia	Rodentia	Myomorpha	Muridae	micromys	Micromys_minutus	muroids	10.7994	789	56
1467	5370	5392	azur_ric_desflaches	14210	2015	10	Male	8	Tetrapoda	Mammalia	Rodentia	Myomorpha	Muridae	mus	Mus_musculus	muroids	10.7994	789	56
1468	5468	5490	azur_ric_desflaches	14210	2015	10	Male	8	Tetrapoda	Mammalia	Rodentia	Myomorpha	Muridae	mus	Mus_musculus	muroids	10.7994	789	56
1469	6578	6600	azur_ric_desflaches	14210	2015	10	Male	8	Tetrapoda	Mammalia	Rodentia	Myomorpha	Muridae	mus	Mus_musculus	muroids	10.7994	789	56
1470	11506	11541	azur_ric_desflaches	14210	2016	3	Male	9	Tetrapoda	Mammalia	Rodentia	Myomorpha	Muridae	mus	Mus_musculus	muroids	10.7994	789	56
1471	15302	15337	azur_ric_desflaches	14210	2016	5	Male	9	Tetrapoda	Mammalia	Rodentia	Myomorpha	Muridae	mus	Mus_musculus	muroids	10.7994	789	56
1472	16367	16402	azur_ric_desflaches	14210	2016	5	Male	9	Tetrapoda	Mammalia	Rodentia	Myomorpha	Muridae	mus	Mus_musculus	muroids	10.7994	789	56
1473	25229	25264	babayaga_owen_sylvia_guenancia	45380	2016	2	Femelle	10	Tetrapoda	Aves	Passeriformes	Passeri	Paridae	cyanistes	Cyanistes_caeruleus	passeriforms	11.2627	637	90
1474	25228	25263	babayaga_owen_sylvia_guenancia	45380	2016	3	Femelle	10	Tetrapoda	Aves	Passeriformes	Passeri	Paridae	cyanistes	Cyanistes_caeruleus	passeriforms	11.2627	637	90
1475	25227	25262	babayaga_owen_sylvia_guenancia	45380	2016	6	Femelle	10	Tetrapoda	Aves	Passeriformes	Passeri	Paridae	parus	Parus_major	passeriforms	11.2627	637	93
1476	3194	3216	babe_carine_lausseur	74550	2015	9	Femelle	0	Tetrapoda	Aves	Passeriformes	Passeri	Passeridae	passer	Passer_domesticus	passeriforms	8.18942	1248	21
1477	3592	3614	babe_carine_lausseur	74550	2015	9	Femelle	0	Tetrapoda	Aves	Passeriformes	Passeri	Passeridae	passer	Passer_domesticus	passeriforms	8.18942	1248	21
1478	2136	2158	babe_carine_lausseur	74550	2015	8	Femelle	0	Tetrapoda	Mammalia	Rodentia	Myomorpha	Muridae	apodemus	Apodemus_sp	muroids	8.18942	1248	21
1479	2138	2160	babe_carine_lausseur	74550	2015	8	Femelle	0	Tetrapoda	Mammalia	Rodentia	Myomorpha	Muridae	apodemus	Apodemus_sp	muroids	8.18942	1248	21
1480	2139	2161	babe_carine_lausseur	74550	2015	8	Femelle	0	Tetrapoda	Mammalia	Rodentia	Myomorpha	Muridae	apodemus	Apodemus_sp	muroids	8.18942	1248	21
1481	1740	1762	babe_carine_lausseur	74550	2015	8	Femelle	0	Tetrapoda	Mammalia	Eulipotyphla	Soricidae	Soricidae	Soricidae_gen_sp	Soricidae_gen_sp	soricids	8.18942	1248	21
1482	1741	1763	babe_carine_lausseur	74550	2015	8	Femelle	0	Tetrapoda	Mammalia	Eulipotyphla	Soricidae	Soricidae	Soricidae_gen_sp	Soricidae_gen_sp	soricids	8.18942	1248	21
1483	3591	3613	babe_carine_lausseur	74550	2015	9	Femelle	0	Tetrapoda	Mammalia	Rodentia	Myomorpha	Muridae	mus	Mus_musculus	muroids	8.18942	1248	21
1484	NA	NA	babig_violaine_bigot	38360	2022	6	Male	0	Tetrapoda	Aves	Passeriformes	Passeri	Turdidae	turdus	Turdus_merula	passeriforms	8.69333	1169	90
1485	NA	NA	babig_violaine_bigot	38360	2022	6	Male	0	Tetrapoda	Mammalia	Rodentia	Myomorpha	Muroidea_fam_gen_sp	Muroidea_fam_gen_sp	Muroidea_fam_gen_sp	muroids	8.69333	1169	90
1486	16708	16743	babine_thibault_flahaut	59740	2016	4	Femelle	2	Tetrapoda	Mammalia	Eulipotyphla	Soricidae	Soricidae	sorex	Sorex_araneus	soricids	9.29425	846	26
1487	37686	Bonnaillie_11_05_20_13_05_20	babou_audrey_bonnaillie	62230	2020	5	Male	5	Tetrapoda	Mammalia	Eulipotyphla	Soricidae	Soricidae	Soricidae_gen_sp	Soricidae_gen_sp	soricids	10.6175	606	93
1488	2184	2206	babou_catherine_picart	93270	2015	5	Male	5	Tetrapoda	Aves	Passeriformes	Passeri	Paridae	cyanistes	Cyanistes_caeruleus	passeriforms	11.0387	638	93
1489	19325	19360	babou_catherine_picart	93270	2016	7	Male	6	Tetrapoda	Aves	Passeriformes	Passeri	Paridae	parus	Parus_major	passeriforms	11.0387	638	93
1490	36130	36165	babou_catherine_picart	93270	2019	6	Male	9	Tetrapoda	Aves	Passeriformes	Passeri	Passeridae	passer	Passer_domesticus	passeriforms	11.0387	638	93
1491	9605	9632	babou_catherine_picart	93270	2016	1	Male	6	Tetrapoda	Aves	Passeriformes	Passeri	Passeridae	passer	Passer_domesticus	passeriforms	11.0387	638	93
1492	2183	2205	babou_catherine_picart	93270	2015	6	Male	5	Tetrapoda	Aves	Passeriformes	Passeri	Passeridae	passer	Passer_domesticus	passeriforms	11.0387	638	93
1493	19327	19362	babou_catherine_picart	93270	2016	7	Male	6	Tetrapoda	Aves	Passeriformes	Passeri	Passeridae	passer	Passer_domesticus	passeriforms	11.0387	638	93
1494	37104	37161	babou_catherine_picart	93270	2019	10	Male	9	Tetrapoda	Aves	Passeriformes	Passeri	Passeridae	passer	Passer_domesticus	passeriforms	11.0387	638	93
1495	36559	36595	babou_catherine_picart	93270	2019	8	Male	9	Tetrapoda	Aves	Passeriformes	Passeri	Passeridae	passer	Passer_sp	passeriforms	11.0387	638	93
1496	19328	19363	babou_catherine_picart	93270	2016	7	Male	6	Tetrapoda	Aves	Passeriformes	Passeri	Muscicapidae	phoenicurus	Phoenicurus_ochruros	passeriforms	11.0387	638	93
1497	34762	34797	babou_catherine_picart	93270	2019	2	Male	9	Tetrapoda	Mammalia	Carnivora	Caniformia	Mustelidae	martes	Martes_foina	other_mammals	11.0387	638	93
1498	167	189	babou_kim_genuy	72560	2015	7	Femelle	7	Tetrapoda	Aves	Passeriformes	Passeri	Turdidae	turdus	Turdus_merula	passeriforms	11.2744	673	84
1499	168	190	babou_kim_genuy	72560	2015	7	Femelle	7	Tetrapoda	Aves	Passeriformes	Passeri	Turdidae	turdus	Turdus_merula	passeriforms	11.2744	673	84
1500	235	257	babou_kim_genuy	72560	2015	7	Femelle	7	Tetrapoda	Mammalia	Eulipotyphla	Soricidae	Soricidae	Soricidae_gen_sp	Soricidae_gen_sp	soricids	11.2744	673	84
1501	2755	2777	babou_olivier_baillon	45340	2015	8	Male	4	Tetrapoda	Mammalia	Eulipotyphla	Soricidae	Soricidae	Soricidae_gen_sp	Soricidae_gen_sp	soricids	10.62	651	34
1502	2754	2776	babou_olivier_baillon	45340	2015	8	Male	4	Tetrapoda	Mammalia	Rodentia	Myomorpha	Cricetidae	Cricetidae_gen_sp	Cricetidae_gen_sp	cricetids	10.62	651	34
1503	7027	7054	babouche_claire_morin	21610	2015	10	Male	9	Tetrapoda	Aves	Aves_ord_fam_gen_sp	Aves_ord_fam_gen_sp	Aves_ord_fam_gen_sp	Aves_ord_fam_gen_sp	Aves_ord_fam_gen_sp	other_birds	10.3482	870	42
1504	13650	13685	babouche_claire_morin	21610	2016	4	Male	10	Tetrapoda	Mammalia	Rodentia	Myomorpha	Cricetidae	Cricetidae_gen_sp	Cricetidae_gen_sp	cricetids	10.3482	870	42
1505	25453	25488	babouche_dos_santos_david	56690	2017	1	Femelle	8	Tetrapoda	Aves	Passeriformes	Passeri	Paridae	cyanistes	Cyanistes_caeruleus	passeriforms	12.1727	904	65
1506	24683	24718	babouche_dos_santos_david	56690	2016	12	Femelle	7	Tetrapoda	Aves	Passeriformes	Passeri	Paridae	periparus	Periparus_ater	passeriforms	12.1727	904	65
1507	24684	24719	babouche_dos_santos_david	56690	2016	12	Femelle	7	Tetrapoda	Mammalia	Chiroptera	Chiroptera_fam_gen_sp	Chiroptera_fam_gen_sp	Chiroptera_fam_gen_sp	Chiroptera_fam_gen_sp	other_mammals	12.1727	904	65
1508	5652	5674	babouche_julien_clesse	69003	2015	10	Femelle	3	Tetrapoda	Aves	Passeriformes	Passeri	Passeridae	passer	Passer_montanus	passeriforms	11.9155	836	93
1509	5654	5676	babouche_julien_clesse	69003	2015	10	Femelle	3	Tetrapoda	Aves	Passeriformes	Passeri	Passeridae	passer	Passer_montanus	passeriforms	11.9155	836	93
1510	5655	5677	babouche_julien_clesse	69003	2015	10	Femelle	3	Tetrapoda	Aves	Passeriformes	Passeri	Passeridae	passer	Passer_montanus	passeriforms	11.9155	836	93
1511	5656	5678	babouche_julien_clesse	69003	2015	10	Femelle	3	Tetrapoda	Aves	Passeriformes	Passeri	Passeridae	passer	Passer_montanus	passeriforms	11.9155	836	93
1512	4429	4451	babouche_marina_ferry	35600	2015	9	Male	3	Tetrapoda	Mammalia	Rodentia	Myomorpha	Muroidea_fam_gen_sp	Muroidea_fam_gen_sp	Muroidea_fam_gen_sp	muroids	12.0942	799	84
1513	3105	3127	baby_brigitte_delboe	59134	2015	9	Male	8	Tetrapoda	Mammalia	Rodentia	Sciuromorpha	Gliridae	eliomys	Eliomys_quercinus	other_mammals	10.2736	696	67
1514	36025	36060	baby_brigitte_delboe	59134	2019	7	Male	12	Tetrapoda	Mammalia	Eulipotyphla	Soricidae	Soricidae	Soricidae_gen_sp	Soricidae_gen_sp	soricids	10.2736	696	67
1515	6358	6380	bacchus_jean_pierre_heyraud	35520	2015	10	Femelle	1	Tetrapoda	Aves	Passeriformes	Passeri	Turdidae	turdus	Turdus_merula	passeriforms	11.2453	744	64
1516	4270	4292	bacchus_jean_pierre_heyraud	35520	2015	9	Femelle	1	Tetrapoda	Aves	Columbiformes	Columbiformes	Columbidae	columba	Columba_palumbus	other_birds	11.2453	744	64
1517	6357	6379	bacchus_jean_pierre_heyraud	35520	2015	10	Femelle	1	Tetrapoda	Mammalia	Rodentia	Myomorpha	Muroidea_fam_gen_sp	Muroidea_fam_gen_sp	Muroidea_fam_gen_sp	muroids	11.2453	744	64
1518	3934	3956	bagera_elsa_bouiller	25970	2015	9	Femelle	6	Tetrapoda	Mammalia	Rodentia	Myomorpha	Muroidea_fam_gen_sp	Muroidea_fam_gen_sp	Muroidea_fam_gen_sp	muroids	10.0895	1138	84
1519	757	779	bagera_elsa_bouiller	25970	2015	8	Femelle	6	Tetrapoda	Mammalia	Rodentia	Myomorpha	Muroidea_fam_gen_sp	Muroidea_fam_gen_sp	Muroidea_fam_gen_sp	muroids	10.0895	1138	84
1520	477	499	bagghera_charlene_vielet	33820	2015	7	Femelle	3	Tetrapoda	Aves	Passeriformes	Passeri	Fringillidae	carduelis	Carduelis_carduelis	passeriforms	12.9021	891	59
1521	22840	22875	bagghera_charlene_vielet	33820	2016	9	Femelle	4	Tetrapoda	Mammalia	Rodentia	Myomorpha	Muridae	rattus	Rattus_norvegicus	muroids	12.9021	891	59
1522	22068	22103	bagghera_charlene_vielet	33820	2016	8	Femelle	4	Tetrapoda	Mammalia	Rodentia	Myomorpha	Muridae	mus	Mus_musculus	muroids	12.9021	891	59
1523	4304	4326	baggio_sam_montagu	53240	2015	9	Male	11	Tetrapoda	Mammalia	Rodentia	Myomorpha	Muridae	apodemus	Apodemus_sp	muroids	11.2446	756	32
1524	9072	9099	bagheera_julie_chedot	27430	2015	12	Male	3	Tetrapoda	Aves	Passeriformes	Passeri	Prunellidae	prunella	Prunella_modularis	passeriforms	10.6305	661	73
1525	16619	16654	bagheera_julie_chedot	27430	2016	5	Male	4	Tetrapoda	Aves	Anseriformes	Anseri	Anatidae	anas	Anas_platyrhynchos	other_birds	10.6305	661	73
1526	16941	16976	bagheera_julie_chedot	27430	2016	6	Male	4	Tetrapoda	Aves	Passeriformes	Passeri	Sturnidae	sturnus	Sturnus_vulgaris	passeriforms	10.6305	661	73
1527	17529	17564	bagheera_julie_chedot	27430	2016	6	Male	4	Tetrapoda	Aves	Passeriformes	Passeri	Sturnidae	sturnus	Sturnus_vulgaris	passeriforms	10.6305	661	73
1528	20208	20243	bagheera_julie_chedot	27430	2016	7	Male	4	Tetrapoda	Aves	Passeriformes	Passeri	Sturnidae	sturnus	Sturnus_vulgaris	passeriforms	10.6305	661	73
1529	20209	20244	bagheera_julie_chedot	27430	2016	7	Male	4	Tetrapoda	Aves	Passeriformes	Passeri	Sturnidae	sturnus	Sturnus_vulgaris	passeriforms	10.6305	661	73
1530	8288	8315	bagheera_julie_chedot	27430	2015	11	Male	3	Tetrapoda	Aves	Galliformes	Phasiani	Phasianidae	phasianus	Phasianus_colchicus	other_birds	10.6305	661	73
1531	6707	6734	bagheera_julie_chedot	27430	2015	7	Male	3	Tetrapoda	Aves	Passeriformes	Passeri	Hirundinidae	delichon	Delichon_urbicum	passeriforms	10.6305	661	73
1532	10258	10293	bagheera_julie_chedot	27430	2016	2	Male	4	Tetrapoda	Aves	Passeriformes	Passeri	Turdidae	turdus	Turdus_merula	passeriforms	10.6305	661	73
1533	23872	23907	bagheera_julie_chedot	27430	2016	10	Male	4	Tetrapoda	Aves	Passeriformes	Passeri	Turdidae	turdus	Turdus_merula	passeriforms	10.6305	661	73
1534	11076	11111	bagheera_julie_chedot	27430	2016	3	Male	4	Tetrapoda	Aves	Passeriformes	Passeri	Paridae	parus	Parus_major	passeriforms	10.6305	661	73
1535	4219	4241	bagheera_julie_chedot	27430	2015	9	Male	3	Tetrapoda	Aves	Passeriformes	Passeri	Passeridae	passer	Passer_domesticus	passeriforms	10.6305	661	73
1536	13434	13469	bagheera_julie_chedot	27430	2016	4	Male	4	Tetrapoda	Aves	Aves_ord_fam_gen_sp	Aves_ord_fam_gen_sp	Aves_ord_fam_gen_sp	Aves_ord_fam_gen_sp	Aves_ord_fam_gen_sp	other_birds	10.6305	661	73
1537	17296	17331	bagheera_julie_chedot	27430	2016	6	Male	4	Tetrapoda	Aves	Aves_ord_fam_gen_sp	Aves_ord_fam_gen_sp	Aves_ord_fam_gen_sp	Aves_ord_fam_gen_sp	Aves_ord_fam_gen_sp	other_birds	10.6305	661	73
1538	13436	13471	bagheera_julie_chedot	27430	2016	4	Male	4	Tetrapoda	Aves	Columbiformes	Columbiformes	Columbidae	columba	Columba_sp	other_birds	10.6305	661	73
1539	12607	12642	bagheera_julie_chedot	27430	2016	4	Male	4	Tetrapoda	Aves	Passeriformes	Passeri	Muscicapidae	erithacus	Erithacus_rubecula	passeriforms	10.6305	661	73
1540	5212	5234	bagheera_julie_chedot	27430	2015	10	Male	3	Tetrapoda	Aves	Columbiformes	Columbiformes	Columbidae	streptopelia	Streptopelia_decaocto	other_birds	10.6305	661	73
1541	16939	16974	bagheera_julie_chedot	27430	2016	6	Male	4	Tetrapoda	Aves	Columbiformes	Columbiformes	Columbidae	streptopelia	Streptopelia_decaocto	other_birds	10.6305	661	73
1542	20211	20246	bagheera_julie_chedot	27430	2016	7	Male	4	Tetrapoda	Aves	Columbiformes	Columbiformes	Columbidae	streptopelia	Streptopelia_decaocto	other_birds	10.6305	661	73
1543	5213	5235	bagheera_julie_chedot	27430	2015	10	Male	3	Tetrapoda	Aves	Passeriformes	Passeri	Troglodytidae	troglodytes	Troglodytes_troglodytes	passeriforms	10.6305	661	73
1544	6821	6848	bagheera_julie_chedot	27430	2015	10	Male	3	Tetrapoda	Mammalia	Mammalia_ord_fam_gen_sp	Mammalia_ord_fam_gen_sp	Mammalia_ord_fam_gen_sp	Mammalia_ord_fam_gen_sp	Mammalia_ord_fam_gen_sp	other_mammals	10.6305	661	73
1545	7358	7385	bagheera_julie_chedot	27430	2015	10	Male	3	Tetrapoda	Mammalia	Rodentia	Myomorpha	Muridae	apodemus	Apodemus_sp	muroids	10.6305	661	73
1546	16622	16657	bagheera_julie_chedot	27430	2016	5	Male	4	Tetrapoda	Mammalia	Rodentia	Myomorpha	Muridae	apodemus	Apodemus_sp	muroids	10.6305	661	73
1547	17642	17677	bagheera_julie_chedot	27430	2016	6	Male	4	Tetrapoda	Mammalia	Rodentia	Myomorpha	Muridae	apodemus	Apodemus_sp	muroids	10.6305	661	73
1548	18848	18883	bagheera_julie_chedot	27430	2016	7	Male	4	Tetrapoda	Mammalia	Rodentia	Myomorpha	Muridae	apodemus	Apodemus_sp	muroids	10.6305	661	73
1549	20210	20245	bagheera_julie_chedot	27430	2016	7	Male	4	Tetrapoda	Mammalia	Rodentia	Myomorpha	Muridae	apodemus	Apodemus_sp	muroids	10.6305	661	73
1550	20212	20247	bagheera_julie_chedot	27430	2016	7	Male	4	Tetrapoda	Mammalia	Rodentia	Myomorpha	Muridae	apodemus	Apodemus_sp	muroids	10.6305	661	73
1551	20213	20248	bagheera_julie_chedot	27430	2016	7	Male	4	Tetrapoda	Mammalia	Rodentia	Myomorpha	Muridae	apodemus	Apodemus_sp	muroids	10.6305	661	73
1552	23871	23906	bagheera_julie_chedot	27430	2016	10	Male	4	Tetrapoda	Mammalia	Rodentia	Myomorpha	Muridae	apodemus	Apodemus_sp	muroids	10.6305	661	73
1553	18849	18884	bagheera_julie_chedot	27430	2016	7	Male	4	Tetrapoda	Mammalia	Rodentia	Myomorpha	Cricetidae	Cricetidae_gen_sp	Cricetidae_gen_sp	cricetids	10.6305	661	73
1554	NA	NA	baghera_florence_giardi	28130	2022	4	Femelle	0	Tetrapoda	Aves	Passeriformes	Passeri	Fringillidae	carduelis	Carduelis_chloris	passeriforms	10.34	600	40
1555	4758	4780	bagouze_aimee_guilbot	33380	2015	9	Femelle	3	Tetrapoda	Mammalia	Rodentia	Myomorpha	Muridae	mus	Mus_musculus	muroids	12.8061	907	60
1556	21132	21167	baguera_edwin_duflos	95280	2016	8	Femelle	3	Tetrapoda	Mammalia	Eulipotyphla	Soricidae	Soricidae	sorex	Sorex_araneus	soricids	10.9899	632	84
1557	21131	21166	baguera_edwin_duflos	95280	2016	8	Femelle	3	Tetrapoda	Mammalia	Eulipotyphla	Soricidae	Soricidae	Soricidae_gen_sp	Soricidae_gen_sp	soricids	10.9899	632	84
1558	17850	17885	baguera_emmanuel_birrer	94340	2016	1	Male	4	Arthropoda	Arachnida	Araneae	Araneae_gen_sp	Araneae_gen_sp	Araneae_gen_sp	Araneae_gen_sp	arachnids	10.4207	655	40
1559	17849	17884	baguera_emmanuel_birrer	94340	2015	7	Male	3	Tetrapoda	Aves	Passeriformes	Passeri	Paridae	cyanistes	Cyanistes_caeruleus	passeriforms	10.4207	655	40
1560	17926	17961	baguera_emmanuel_birrer	94340	2016	2	Male	4	Tetrapoda	Aves	Passeriformes	Passeri	Passeridae	passer	Passer_domesticus	passeriforms	11.5423	625	90
1561	17797	17832	baguera_emmanuel_birrer	94340	2015	8	Male	3	Arthropoda	Hexapoda	Mantodea	Mantoidea	Mantidae	mantis	Mantis_religiosa	hexapods	13.3953	666	29
1562	18793	18828	baguera_emmanuel_birrer	94340	2016	6	Male	4	Arthropoda	Hexapoda	Lepidoptera	Lepidoptera_fam_gen_sp	Lepidoptera_fam_gen_sp	Lepidoptera_fam_gen_sp	Lepidoptera_fam_gen_sp	hexapods	11.5423	625	90
1563	17795	17830	baguera_emmanuel_birrer	94340	2015	7	Male	3	Tetrapoda	Mammalia	Eulipotyphla	Soricidae	Soricidae	Soricidae_gen_sp	Soricidae_gen_sp	soricids	10.4207	655	40
1564	17794	17829	baguera_emmanuel_birrer	94340	2015	8	Male	3	Tetrapoda	Squamata	Squamata	Lacertilia	Lacertidae	podarcis	Podarcis_muralis	lacertilia	10.4207	655	40
1565	17851	17886	baguera_emmanuel_birrer	94340	2015	7	Male	3	Tetrapoda	Squamata	Squamata	Lacertilia	Lacertidae	podarcis	Podarcis_muralis	lacertilia	10.4207	655	40
1566	17925	17960	baguera_emmanuel_birrer	94340	2015	7	Male	3	Tetrapoda	Squamata	Squamata	Lacertilia	Lacertidae	podarcis	Podarcis_muralis	lacertilia	13.3953	666	29
1567	18141	18176	baguera_emmanuel_birrer	94340	2015	8	Male	3	Tetrapoda	Squamata	Squamata	Lacertilia	Lacertidae	zootoca	Zootoca_vivipara	lacertilia	10.4207	655	40
1568	17853	17888	baguera_emmanuel_birrer	94340	2015	7	Male	3	Tetrapoda	Squamata	Squamata	Lacertilia	Lacertidae	zootoca	Zootoca_vivipara	lacertilia	10.4207	655	40
1569	30140	30175	baguerra_pouder_florent_le	46100	2017	9	Male	2	Tetrapoda	Aves	Passeriformes	Passeri	Turdidae	turdus	Turdus_merula	passeriforms	11.8822	753	70
1570	30141	30176	baguerra_pouder_florent_le	46100	2017	9	Male	2	Tetrapoda	Mammalia	Lagomorpha	Leporidae	Leporidae	oryctolagus	Oryctolagus_cuniculus	other_mammals	11.8822	753	70
1571	30142	30177	baguerra_pouder_florent_le	46100	2017	9	Male	2	Tetrapoda	Mammalia	Rodentia	Myomorpha	Cricetidae	Cricetidae_gen_sp	Cricetidae_gen_sp	cricetids	11.8822	753	70
1572	29260	29295	bakounine_dominique_cointreau	78550	2017	5	Male	5	Tetrapoda	Aves	Passeriformes	Passeri	Turdidae	turdus	Turdus_merula	passeriforms	10.4523	611	53
1573	17220	17255	bakounine_dominique_cointreau	78550	2016	6	Male	5	Tetrapoda	Aves	Passeriformes	Passeri	Paridae	cyanistes	Cyanistes_caeruleus	passeriforms	10.4523	611	53
1574	29259	29294	bakounine_dominique_cointreau	78550	2017	4	Male	5	Tetrapoda	Aves	Passeriformes	Passeri	Paridae	cyanistes	Cyanistes_caeruleus	passeriforms	10.4523	611	53
1575	25257	25292	bakounine_dominique_cointreau	78550	2017	1	Male	5	Tetrapoda	Mammalia	Rodentia	Myomorpha	Cricetidae	arvicola	Arvicola_sp	cricetids	10.4523	611	53
1576	25258	25293	bakounine_dominique_cointreau	78550	2017	1	Male	5	Tetrapoda	Mammalia	Rodentia	Myomorpha	Cricetidae	arvicola	Arvicola_sp	cricetids	10.4523	611	53
1577	4049	4071	bakounine_dominique_cointreau	78550	2015	9	Male	5	Tetrapoda	Mammalia	Mammalia_ord_fam_gen_sp	Mammalia_ord_fam_gen_sp	Mammalia_ord_fam_gen_sp	Mammalia_ord_fam_gen_sp	Mammalia_ord_fam_gen_sp	other_mammals	10.4523	611	53
1578	4050	4072	bakounine_dominique_cointreau	78550	2015	9	Male	5	Tetrapoda	Mammalia	Mammalia_ord_fam_gen_sp	Mammalia_ord_fam_gen_sp	Mammalia_ord_fam_gen_sp	Mammalia_ord_fam_gen_sp	Mammalia_ord_fam_gen_sp	other_mammals	10.4523	611	53
1579	4980	5002	bakounine_dominique_cointreau	78550	2015	9	Male	5	Tetrapoda	Mammalia	Mammalia_ord_fam_gen_sp	Mammalia_ord_fam_gen_sp	Mammalia_ord_fam_gen_sp	Mammalia_ord_fam_gen_sp	Mammalia_ord_fam_gen_sp	other_mammals	10.4523	611	53
1580	6714	6741	bakounine_dominique_cointreau	78550	2015	10	Male	5	Tetrapoda	Mammalia	Mammalia_ord_fam_gen_sp	Mammalia_ord_fam_gen_sp	Mammalia_ord_fam_gen_sp	Mammalia_ord_fam_gen_sp	Mammalia_ord_fam_gen_sp	other_mammals	10.4523	611	53
1581	1665	1687	bakounine_dominique_cointreau	78550	2015	8	Male	5	Tetrapoda	Mammalia	Rodentia	Myomorpha	Muridae	apodemus	Apodemus_sp	muroids	10.4523	611	53
1582	6469	6491	bakounine_dominique_cointreau	78550	2015	10	Male	5	Tetrapoda	Mammalia	Rodentia	Myomorpha	Muridae	apodemus	Apodemus_sp	muroids	10.4523	611	53
1583	22753	22788	bakounine_dominique_cointreau	78550	2016	9	Male	5	Tetrapoda	Mammalia	Rodentia	Myomorpha	Muridae	apodemus	Apodemus_sp	muroids	10.4523	611	53
1584	22141	22176	bakounine_dominique_cointreau	78550	2016	8	Male	NA	Tetrapoda	Mammalia	Rodentia	Myomorpha	Muridae	apodemus	Apodemus_sp	muroids	10.4523	611	53
1585	1103	1125	bakounine_dominique_cointreau	78550	2015	8	Male	5	Tetrapoda	Mammalia	Rodentia	Myomorpha	Muridae	apodemus	Apodemus_sp	muroids	10.4523	611	57
1586	29261	29296	bakounine_dominique_cointreau	78550	2017	7	Male	5	Tetrapoda	Mammalia	Eulipotyphla	Soricidae	Soricidae	Soricidae_gen_sp	Soricidae_gen_sp	soricids	10.4523	611	53
1587	17915	17950	bakounine_dominique_cointreau	78550	2016	6	Male	NA	Tetrapoda	Mammalia	Rodentia	Myomorpha	Cricetidae	Cricetidae_gen_sp	Cricetidae_gen_sp	cricetids	10.4523	611	53
1588	2221	2243	bakounine_dominique_cointreau	78550	2015	8	Male	5	Tetrapoda	Mammalia	Rodentia	Myomorpha	Cricetidae	Cricetidae_gen_sp	Cricetidae_gen_sp	cricetids	10.4523	611	53
1589	2306	2328	bakounine_dominique_cointreau	78550	2015	8	Male	5	Tetrapoda	Mammalia	Rodentia	Myomorpha	Cricetidae	Cricetidae_gen_sp	Cricetidae_gen_sp	cricetids	10.4523	611	53
1590	2850	2872	bakounine_dominique_cointreau	78550	2015	9	Male	5	Tetrapoda	Mammalia	Rodentia	Myomorpha	Cricetidae	Cricetidae_gen_sp	Cricetidae_gen_sp	cricetids	10.4523	611	53
1591	3284	3306	bakounine_dominique_cointreau	78550	2015	9	Male	5	Tetrapoda	Mammalia	Rodentia	Myomorpha	Cricetidae	Cricetidae_gen_sp	Cricetidae_gen_sp	cricetids	10.4523	611	53
1592	3285	3307	bakounine_dominique_cointreau	78550	2015	9	Male	5	Tetrapoda	Mammalia	Rodentia	Myomorpha	Cricetidae	Cricetidae_gen_sp	Cricetidae_gen_sp	cricetids	10.4523	611	53
1593	6715	6742	bakounine_dominique_cointreau	78550	2015	10	Male	5	Tetrapoda	Mammalia	Rodentia	Myomorpha	Cricetidae	Cricetidae_gen_sp	Cricetidae_gen_sp	cricetids	10.4523	611	53
1594	8692	8719	bakounine_dominique_cointreau	78550	2015	12	Male	5	Tetrapoda	Mammalia	Rodentia	Myomorpha	Cricetidae	Cricetidae_gen_sp	Cricetidae_gen_sp	cricetids	10.4523	611	53
1595	17510	17545	bakounine_dominique_cointreau	78550	2016	6	Male	5	Tetrapoda	Mammalia	Rodentia	Myomorpha	Cricetidae	Cricetidae_gen_sp	Cricetidae_gen_sp	cricetids	10.4523	611	53
1596	24116	24151	bakounine_dominique_cointreau	78550	2016	10	Male	5	Tetrapoda	Mammalia	Rodentia	Myomorpha	Cricetidae	Cricetidae_gen_sp	Cricetidae_gen_sp	cricetids	10.4523	611	53
1597	24117	24152	bakounine_dominique_cointreau	78550	2016	11	Male	5	Tetrapoda	Mammalia	Rodentia	Myomorpha	Cricetidae	Cricetidae_gen_sp	Cricetidae_gen_sp	cricetids	10.4523	611	53
1598	29262	29297	bakounine_dominique_cointreau	78550	2017	7	Male	5	Tetrapoda	Mammalia	Rodentia	Myomorpha	Cricetidae	Cricetidae_gen_sp	Cricetidae_gen_sp	cricetids	10.4523	611	53
1599	22142	22177	bakounine_dominique_cointreau	78550	2016	7	Male	5	Tetrapoda	Mammalia	Rodentia	Myomorpha	Cricetidae	Cricetidae_gen_sp	Cricetidae_gen_sp	cricetids	10.4523	611	53
1600	1661	1683	bakounine_dominique_cointreau	78550	2015	8	Male	5	Tetrapoda	Mammalia	Rodentia	Myomorpha	Muroidea_fam_gen_sp	Muroidea_fam_gen_sp	Muroidea_fam_gen_sp	muroids	10.4523	611	53
1601	1662	1684	bakounine_dominique_cointreau	78550	2015	8	Male	5	Tetrapoda	Mammalia	Rodentia	Myomorpha	Muroidea_fam_gen_sp	Muroidea_fam_gen_sp	Muroidea_fam_gen_sp	muroids	10.4523	611	53
1602	988	1010	bakounine_dominique_cointreau	78550	2015	8	Male	5	Tetrapoda	Mammalia	Rodentia	Myomorpha	Muroidea_fam_gen_sp	Muroidea_fam_gen_sp	Muroidea_fam_gen_sp	muroids	10.4523	611	53
1603	19025	19060	baloo_katia_chevalier	6250	2016	7	Male	6	Tetrapoda	Squamata	Squamata	Lacertilia	Phyllodactylidae	tarentola	Tarentola_mauritanica	lacertilia	14.4379	850	56
1604	19028	19063	baloo_katia_chevalier	6250	2016	6	Male	6	Tetrapoda	Squamata	Squamata	Lacertilia	Phyllodactylidae	tarentola	Tarentola_mauritanica	lacertilia	14.4379	850	56
1605	19029	19064	baloo_katia_chevalier	6250	2016	6	Male	6	Tetrapoda	Squamata	Squamata	Lacertilia	Phyllodactylidae	tarentola	Tarentola_mauritanica	lacertilia	14.4379	850	56
1606	29601	29636	balou_christelle_naveau	72160	2017	8	Male	8	Tetrapoda	Mammalia	Rodentia	Myomorpha	Muridae	apodemus	Apodemus_sp	muroids	10.924	670	32
1607	37459	37516	balou_christelle_naveau	72160	2019	7	Male	10	Tetrapoda	Mammalia	Rodentia	Myomorpha	Muridae	apodemus	Apodemus_sp	muroids	11.4932	680	93
1608	28752	28787	balou_christelle_naveau	72160	2017	7	Male	8	Tetrapoda	Mammalia	Rodentia	Myomorpha	Muroidea_fam_gen_sp	Muroidea_fam_gen_sp	Muroidea_fam_gen_sp	muroids	10.924	670	32
1609	13550	13585	balou_christelle_naveau	72160	2016	4	Male	7	Tetrapoda	Mammalia	Eulipotyphla	Talpidae	Talpidae	talpa	Talpa_sp	other_mammals	10.924	670	32
1610	15055	15090	balou_joelle_ripaille	64260	2016	5	Male	5	Tetrapoda	Aves	Passeriformes	Passeri	Sylviidae	sylvia	Sylvia_atricapilla	passeriforms	12.8614	1102	67
1611	23858	23893	balou_joelle_ripaille	64260	2016	10	Male	5	Tetrapoda	Aves	Passeriformes	Passeri	Turdidae	turdus	Turdus_philomelos	passeriforms	12.8614	1102	67
1612	19869	19904	balou_joelle_ripaille	64260	2016	7	Male	5	Tetrapoda	Aves	Passeriformes	Passeri	Turdidae	turdus	Turdus_merula	passeriforms	12.8614	1102	67
1613	16769	16804	balou_joelle_ripaille	64260	2016	5	Male	5	Tetrapoda	Aves	Passeriformes	Passeri	Passeridae	passer	Passer_domesticus	passeriforms	12.8614	1102	67
1614	16771	16806	balou_joelle_ripaille	64260	2016	6	Male	5	Tetrapoda	Aves	Passeriformes	Passeri	Passeridae	passer	Passer_domesticus	passeriforms	12.8614	1102	67
1615	18757	18792	balou_joelle_ripaille	64260	2016	6	Male	5	Tetrapoda	Aves	Passeriformes	Passeri	Passeridae	passer	Passer_domesticus	passeriforms	12.8614	1102	67
1616	18758	18793	balou_joelle_ripaille	64260	2016	7	Male	5	Tetrapoda	Aves	Passeriformes	Passeri	Passeridae	passer	Passer_domesticus	passeriforms	12.8614	1102	67
1617	18924	18959	balou_joelle_ripaille	64260	2016	7	Male	5	Tetrapoda	Aves	Aves_ord_fam_gen_sp	Aves_ord_fam_gen_sp	Aves_ord_fam_gen_sp	Aves_ord_fam_gen_sp	Aves_ord_fam_gen_sp	other_birds	12.8614	1102	51
1618	5772	5794	balou_joelle_ripaille	64260	2015	10	Male	4	Tetrapoda	Aves	Passeriformes	Passeri	Muscicapidae	erithacus	Erithacus_rubecula	passeriforms	12.8614	1102	67
1619	6711	6738	balou_joelle_ripaille	64260	2015	10	Male	4	Tetrapoda	Aves	Passeriformes	Passeri	Muscicapidae	erithacus	Erithacus_rubecula	passeriforms	12.8614	1102	67
1620	7986	8013	balou_joelle_ripaille	64260	2015	11	Male	4	Tetrapoda	Aves	Passeriformes	Passeri	Muscicapidae	erithacus	Erithacus_rubecula	passeriforms	12.8614	1102	67
1621	23856	23891	balou_joelle_ripaille	64260	2016	10	Male	5	Tetrapoda	Aves	Passeriformes	Passeri	Muscicapidae	erithacus	Erithacus_rubecula	passeriforms	12.8614	1102	67
1622	5771	5793	balou_joelle_ripaille	64260	2015	10	Male	4	Tetrapoda	Aves	Passeriformes	Passeri	Muscicapidae	phoenicurus	Phoenicurus_ochruros	passeriforms	12.8614	1102	67
1623	21509	21544	balou_joelle_ripaille	64260	2016	8	Male	5	Tetrapoda	Aves	Passeriformes	Passeri	Muscicapidae	phoenicurus	Phoenicurus_ochruros	passeriforms	12.8614	1102	67
1624	23857	23892	balou_joelle_ripaille	64260	2016	10	Male	5	Tetrapoda	Aves	Passeriformes	Passeri	Troglodytidae	troglodytes	Troglodytes_troglodytes	passeriforms	12.8614	1102	67
1625	9627	9654	balou_joelle_ripaille	64260	2016	1	Male	5	Tetrapoda	Mammalia	Rodentia	Myomorpha	Muridae	apodemus	Apodemus_sp	muroids	12.8614	1102	67
1626	13773	13808	balou_joelle_ripaille	64260	2016	4	Male	5	Tetrapoda	Mammalia	Rodentia	Myomorpha	Muridae	apodemus	Apodemus_sp	muroids	12.8614	1102	67
1627	16770	16805	balou_joelle_ripaille	64260	2016	5	Male	5	Tetrapoda	Mammalia	Rodentia	Myomorpha	Muridae	apodemus	Apodemus_sp	muroids	12.8614	1102	67
1628	2334	2356	balou_joelle_ripaille	64260	2015	8	Male	4	Tetrapoda	Squamata	Squamata	Lacertilia	Lacertilia_fam_gen_sp	Lacertilia_fam_gen_sp	Lacertilia_fam_gen_sp	lacertilia	12.8614	1102	67
1629	28783	28818	balthazar_sarah_vasseur	62370	2017	7	Male	2	Tetrapoda	Aves	Passeriformes	Passeri	Turdidae	turdus	Turdus_sp	passeriforms	10.5107	650	40
1630	28494	28529	balthazar_sarah_vasseur	62370	2017	6	Male	2	Tetrapoda	Aves	Passeriformes	Passeri	Turdidae	turdus	Turdus_merula	passeriforms	10.5107	650	40
1631	26497	26532	balthazar_sarah_vasseur	62370	2017	4	Male	2	Tetrapoda	Aves	Passeriformes	Passeri	Turdidae	turdus	Turdus_merula	passeriforms	10.5107	650	40
1632	26300	26335	balthazar_sarah_vasseur	62370	2017	3	Male	2	Tetrapoda	Aves	Passeriformes	Passeri	Muscicapidae	erithacus	Erithacus_rubecula	passeriforms	10.5107	650	40
1633	27527	27562	balthazar_sarah_vasseur	62370	2017	5	Male	2	Tetrapoda	Mammalia	Rodentia	Myomorpha	Cricetidae	arvicola	Arvicola_sp	cricetids	10.5107	650	40
1634	29419	29454	balthazar_sarah_vasseur	62370	2017	8	Male	2	Tetrapoda	Mammalia	Rodentia	Myomorpha	Muroidea_fam_gen_sp	Muroidea_fam_gen_sp	Muroidea_fam_gen_sp	muroids	10.5107	650	40
1635	26841	26876	balthazar_sarah_vasseur	62370	2017	4	Male	2	Tetrapoda	Mammalia	Eulipotyphla	Soricidae	Soricidae	Soricidae_gen_sp	Soricidae_gen_sp	soricids	10.5107	650	40
1636	26496	26531	balthazar_sarah_vasseur	62370	2017	4	Male	2	Tetrapoda	Mammalia	Eulipotyphla	Soricidae	Soricidae	Soricidae_gen_sp	Soricidae_gen_sp	soricids	10.5107	650	40
1637	27528	27563	balthazar_sarah_vasseur	62370	2017	5	Male	2	Tetrapoda	Mammalia	Eulipotyphla	Soricidae	Soricidae	Soricidae_gen_sp	Soricidae_gen_sp	soricids	10.5107	650	40
1638	28120	28155	balthazar_sarah_vasseur	62370	2017	6	Male	2	Tetrapoda	Mammalia	Rodentia	Myomorpha	Cricetidae	Cricetidae_gen_sp	Cricetidae_gen_sp	cricetids	10.5107	650	40
1639	28655	28690	balthazar_sarah_vasseur	62370	2017	7	Male	2	Tetrapoda	Mammalia	Rodentia	Myomorpha	Muridae	mus	Mus_musculus	muroids	10.5107	650	40
1640	3229	3251	baltimore_annabelle_joubaud	44600	2015	9	Male	12	Tetrapoda	Mammalia	Rodentia	Myomorpha	Muridae	apodemus	Apodemus_sp	muroids	12.5208	802	73
1641	4421	4443	baltimore_annabelle_joubaud	44600	2015	9	Male	12	Tetrapoda	Mammalia	Rodentia	Myomorpha	Muridae	apodemus	Apodemus_sp	muroids	12.5208	802	73
1642	NA	NA	balto_dominique_ropers	81190	2021	7	Male	0	Tetrapoda	Mammalia	Rodentia	Myomorpha	Muroidea_fam_gen_sp	Muroidea_fam_gen_sp	Muroidea_fam_gen_sp	muroids	12.0016	757	21
1643	31016	31051	bamboo_sandrine_bize	77400	2017	12	Male	1	Tetrapoda	Aves	Passeriformes	Passeri	Sturnidae	sturnus	Sturnus_vulgaris	passeriforms	10.6829	634	78
1644	31196	31231	bamboo_sandrine_bize	77400	2017	12	Male	1	Tetrapoda	Aves	Passeriformes	Passeri	Paridae	cyanistes	Cyanistes_caeruleus	passeriforms	10.6829	634	78
1645	35497	35532	bamboo_sandrine_bize	77400	2019	5	Male	3	Tetrapoda	Aves	Passeriformes	Passeri	Passeridae	passer	Passer_domesticus	passeriforms	10.6829	634	78
1646	34600	34635	bamboo_sandrine_bize	77400	2019	1	Male	3	Tetrapoda	Aves	Aves_ord_fam_gen_sp	Aves_ord_fam_gen_sp	Aves_ord_fam_gen_sp	Aves_ord_fam_gen_sp	Aves_ord_fam_gen_sp	other_birds	10.6829	634	78
1647	34599	34634	bamboo_sandrine_bize	77400	2019	2	Male	3	Tetrapoda	Aves	Columbiformes	Columbiformes	Columbidae	columba	Columba_palumbus	other_birds	10.6829	634	78
1648	25209	25244	bamboo_sandrine_bize	77400	2017	1	Male	1	Tetrapoda	Aves	Passeriformes	Passeri	Muscicapidae	erithacus	Erithacus_rubecula	passeriforms	10.6829	634	78
1649	4549	4571	bambou_regine_ract	91190	2015	9	Femelle	6	Tetrapoda	Mammalia	Rodentia	Myomorpha	Muroidea_fam_gen_sp	Muroidea_fam_gen_sp	Muroidea_fam_gen_sp	muroids	10.6036	641	87
1650	13214	13249	bambou_stephanie_janik	73200	2016	4	Femelle	3	Tetrapoda	Aves	Passeriformes	Passeri	Turdidae	turdus	Turdus_merula	passeriforms	8.02817	1161	71
1651	18371	18406	bambou_sylvie_gomes	92500	2016	6	Femelle	7	Tetrapoda	Mammalia	Rodentia	Myomorpha	Muridae	mus	Mus_musculus	muroids	11.5492	630	93
1652	10875	10910	bambou_yveline_teulier	12000	2016	2	Male	10	Tetrapoda	Aves	Passeriformes	Passeri	Turdidae	turdus	Turdus_merula	passeriforms	10.7471	742	79
1653	8408	8435	bambou_yveline_teulier	12000	2015	11	Male	9	Tetrapoda	Mammalia	Rodentia	Myomorpha	Muroidea_fam_gen_sp	Muroidea_fam_gen_sp	Muroidea_fam_gen_sp	muroids	10.7471	742	79
1654	11627	11662	bambou_yveline_teulier	12000	2016	3	Male	10	Tetrapoda	Mammalia	Rodentia	Myomorpha	Muroidea_fam_gen_sp	Muroidea_fam_gen_sp	Muroidea_fam_gen_sp	muroids	10.7471	742	79
1655	8270	8297	bambou_yveline_teulier	12000	2015	11	Male	9	Tetrapoda	Mammalia	Rodentia	Myomorpha	Muridae	apodemus	Apodemus_sp	muroids	10.7471	742	79
1656	8514	8541	bambou_yveline_teulier	12000	2015	11	Male	9	Tetrapoda	Mammalia	Rodentia	Myomorpha	Muridae	apodemus	Apodemus_sp	muroids	10.7471	742	79
1657	11787	11822	bambou_yveline_teulier	12000	2016	3	Male	10	Tetrapoda	Mammalia	Eulipotyphla	Soricidae	Soricidae	Soricidae_gen_sp	Soricidae_gen_sp	soricids	10.7471	742	79
1658	12432	12467	bambou_yveline_teulier	12000	2016	4	Male	10	Tetrapoda	Mammalia	Eulipotyphla	Soricidae	Soricidae	Soricidae_gen_sp	Soricidae_gen_sp	soricids	10.7471	742	79
1659	10606	10641	bambou_yveline_teulier	12000	2016	2	Male	10	Tetrapoda	Mammalia	Rodentia	Myomorpha	Muroidea_fam_gen_sp	Muroidea_fam_gen_sp	Muroidea_fam_gen_sp	muroids	10.7471	742	79
1660	10607	10642	bambou_yveline_teulier	12000	2016	2	Male	10	Tetrapoda	Mammalia	Rodentia	Myomorpha	Muroidea_fam_gen_sp	Muroidea_fam_gen_sp	Muroidea_fam_gen_sp	muroids	10.7471	742	79
1661	10644	10679	bambou_yveline_teulier	12000	2016	2	Male	10	Tetrapoda	Mammalia	Rodentia	Myomorpha	Muroidea_fam_gen_sp	Muroidea_fam_gen_sp	Muroidea_fam_gen_sp	muroids	10.7471	742	79
1662	14250	14285	bambou_yveline_teulier	12000	2016	5	Male	10	Tetrapoda	Squamata	Squamata	Lacertilia	Lacertidae	lacerta	Lacerta_sp	lacertilia	10.7471	742	79
1663	5675	5697	bambou_yveline_teulier	12000	2015	10	Male	9	Tetrapoda	Squamata	Squamata	Lacertilia	Lacertilia_fam_gen_sp	Lacertilia_fam_gen_sp	Lacertilia_fam_gen_sp	lacertilia	10.7471	742	79
1664	11626	11661	bambou_yveline_teulier	12000	2016	3	Male	10	Tetrapoda	Squamata	Squamata	Lacertilia	Lacertilia_fam_gen_sp	Lacertilia_fam_gen_sp	Lacertilia_fam_gen_sp	lacertilia	10.7471	742	79
1665	11786	11821	bambou_yveline_teulier	12000	2016	3	Male	10	Tetrapoda	Squamata	Squamata	Lacertilia	Lacertilia_fam_gen_sp	Lacertilia_fam_gen_sp	Lacertilia_fam_gen_sp	lacertilia	10.7471	742	79
1666	19442	19477	bandit_anne_france_petit	76000	2016	7	Male	2	Tetrapoda	Aves	Passeriformes	Passeri	Passeridae	passer	Passer_domesticus	passeriforms	10.6152	745	93
1667	19443	19478	bandit_anne_france_petit	76000	2016	7	Male	2	Tetrapoda	Aves	Passeriformes	Passeri	Passeridae	passer	Passer_domesticus	passeriforms	10.6152	745	93
1668	19923	19958	bandit_anne_france_petit	76000	2016	7	Male	2	Tetrapoda	Aves	Passeriformes	Passeri	Passeridae	passer	Passer_domesticus	passeriforms	10.6152	745	93
1669	27165	27200	bandit_anne_france_petit	76000	2017	5	Male	3	Tetrapoda	Aves	Aves_ord_fam_gen_sp	Aves_ord_fam_gen_sp	Aves_ord_fam_gen_sp	Aves_ord_fam_gen_sp	Aves_ord_fam_gen_sp	other_birds	10.6152	745	93
1670	20566	20601	bandit_anne_france_petit	76000	2016	7	Male	2	Tetrapoda	Aves	Aves_ord_fam_gen_sp	Aves_ord_fam_gen_sp	Aves_ord_fam_gen_sp	Aves_ord_fam_gen_sp	Aves_ord_fam_gen_sp	other_birds	10.6152	745	93
1671	20726	20761	bandit_anne_france_petit	76000	2016	7	Male	2	Tetrapoda	Aves	Aves_ord_fam_gen_sp	Aves_ord_fam_gen_sp	Aves_ord_fam_gen_sp	Aves_ord_fam_gen_sp	Aves_ord_fam_gen_sp	other_birds	10.6152	745	93
1672	20995	21030	bandit_anne_france_petit	76000	2016	8	Male	2	Tetrapoda	Aves	Aves_ord_fam_gen_sp	Aves_ord_fam_gen_sp	Aves_ord_fam_gen_sp	Aves_ord_fam_gen_sp	Aves_ord_fam_gen_sp	other_birds	10.6152	745	93
1673	32277	32312	bandit_anne_france_petit	76000	2018	5	Male	4	Tetrapoda	Aves	Aves_ord_fam_gen_sp	Aves_ord_fam_gen_sp	Aves_ord_fam_gen_sp	Aves_ord_fam_gen_sp	Aves_ord_fam_gen_sp	other_birds	10.6152	745	93
1674	32278	32313	bandit_anne_france_petit	76000	2018	5	Male	4	Tetrapoda	Aves	Aves_ord_fam_gen_sp	Aves_ord_fam_gen_sp	Aves_ord_fam_gen_sp	Aves_ord_fam_gen_sp	Aves_ord_fam_gen_sp	other_birds	10.6152	745	93
1675	32772	32807	bandit_anne_france_petit	76000	2018	6	Male	4	Tetrapoda	Aves	Aves_ord_fam_gen_sp	Aves_ord_fam_gen_sp	Aves_ord_fam_gen_sp	Aves_ord_fam_gen_sp	Aves_ord_fam_gen_sp	other_birds	10.6152	745	93
1676	35947	35982	bandit_anne_france_petit	76000	2019	7	Male	5	Tetrapoda	Aves	Aves_ord_fam_gen_sp	Aves_ord_fam_gen_sp	Aves_ord_fam_gen_sp	Aves_ord_fam_gen_sp	Aves_ord_fam_gen_sp	other_birds	10.6152	745	93
1677	36391	36426	bandit_anne_france_petit	76000	2019	8	Male	5	Tetrapoda	Aves	Aves_ord_fam_gen_sp	Aves_ord_fam_gen_sp	Aves_ord_fam_gen_sp	Aves_ord_fam_gen_sp	Aves_ord_fam_gen_sp	other_birds	10.6152	745	93
1678	20327	20362	bandit_anne_france_petit	76000	2016	7	Male	2	Tetrapoda	Aves	Aves_ord_fam_gen_sp	Aves_ord_fam_gen_sp	Aves_ord_fam_gen_sp	Aves_ord_fam_gen_sp	Aves_ord_fam_gen_sp	other_birds	10.6152	745	93
1679	24602	24637	bandit_anne_france_petit	76000	2016	12	Male	2	Tetrapoda	Aves	Aves_ord_fam_gen_sp	Aves_ord_fam_gen_sp	Aves_ord_fam_gen_sp	Aves_ord_fam_gen_sp	Aves_ord_fam_gen_sp	other_birds	10.6152	745	93
1680	20328	20363	bandit_anne_france_petit	76000	2016	7	Male	2	Tetrapoda	Aves	Aves_ord_fam_gen_sp	Aves_ord_fam_gen_sp	Aves_ord_fam_gen_sp	Aves_ord_fam_gen_sp	Aves_ord_fam_gen_sp	other_birds	10.6152	745	93
1681	26846	26881	bandit_anne_france_petit	76000	2017	4	Male	3	Tetrapoda	Aves	Aves_ord_fam_gen_sp	Aves_ord_fam_gen_sp	Aves_ord_fam_gen_sp	Aves_ord_fam_gen_sp	Aves_ord_fam_gen_sp	other_birds	10.6152	745	93
1682	19696	19731	bandit_anne_france_petit	76000	2016	7	Male	2	Tetrapoda	Aves	Aves_ord_fam_gen_sp	Aves_ord_fam_gen_sp	Aves_ord_fam_gen_sp	Aves_ord_fam_gen_sp	Aves_ord_fam_gen_sp	other_birds	10.6152	745	93
1683	29785	29820	bandit_anne_france_petit	76000	2017	9	Male	3	Tetrapoda	Mammalia	Chiroptera	Chiroptera_fam_gen_sp	Chiroptera_fam_gen_sp	Chiroptera_fam_gen_sp	Chiroptera_fam_gen_sp	other_mammals	10.6152	745	93
1684	19550	19585	bandit_anne_france_petit	76000	2016	7	Male	2	Tetrapoda	Mammalia	Rodentia	Myomorpha	Muridae	apodemus	Apodemus_sp	muroids	10.6152	745	93
1685	35946	35981	bandit_anne_france_petit	76000	2019	7	Male	5	Tetrapoda	Mammalia	Rodentia	Myomorpha	Muridae	apodemus	Apodemus_sp	muroids	10.6152	745	93
1686	36689	36725	bandit_anne_france_petit	76000	2019	8	Male	5	Tetrapoda	Mammalia	Rodentia	Myomorpha	Muroidea_fam_gen_sp	Muroidea_fam_gen_sp	Muroidea_fam_gen_sp	muroids	10.6152	745	93
1687	33061	33096	bandit_anne_france_petit	76000	2018	7	Male	4	Tetrapoda	Mammalia	Rodentia	Myomorpha	Muridae	mus	Mus_musculus	muroids	10.6152	745	93
1688	29567	29602	bandit_aurelie_obert	34820	2017	8	Male	9	Tetrapoda	Aves	Columbiformes	Columbiformes	Columbidae	streptopelia	Streptopelia_decaocto	other_birds	14.3042	668	71
1689	27739	27774	bandit_aurelie_obert	34820	2017	5	Male	9	Tetrapoda	Mammalia	Lagomorpha	Leporidae	Leporidae	oryctolagus	Oryctolagus_cuniculus	other_mammals	14.3042	668	71
1690	22343	22378	bandit_aurelie_obert	34820	2016	9	Male	8	Tetrapoda	Mammalia	Rodentia	Myomorpha	Cricetidae	Cricetidae_gen_sp	Cricetidae_gen_sp	cricetids	14.3042	668	71
1691	29541	29576	bandit_aurelie_obert	34820	2017	8	Male	9	Tetrapoda	Mammalia	Rodentia	Myomorpha	Muroidea_fam_gen_sp	Muroidea_fam_gen_sp	Muroidea_fam_gen_sp	muroids	14.3042	668	71
1692	5878	5900	bandit_claude_triffault	82120	2015	10	Male	8	Tetrapoda	Mammalia	Rodentia	Myomorpha	Muroidea_fam_gen_sp	Muroidea_fam_gen_sp	Muroidea_fam_gen_sp	muroids	12.7411	892	40
1693	8447	8474	bandit_claude_triffault	82120	2015	11	Male	8	Tetrapoda	Mammalia	Rodentia	Myomorpha	Muridae	mus	Mus_musculus	muroids	12.7411	892	40
1694	9350	9377	bandit_claude_triffault	82120	2015	12	Male	8	Tetrapoda	Mammalia	Rodentia	Myomorpha	Muridae	mus	Mus_musculus	muroids	12.7411	892	40
1695	11705	11740	bandit_claude_triffault	82120	2016	3	Male	9	Tetrapoda	Mammalia	Rodentia	Myomorpha	Muridae	mus	Mus_musculus	muroids	12.7411	892	40
1696	6435	6457	bandit_looc_garnier	71670	2015	10	Male	2	Tetrapoda	Aves	Passeriformes	Passeri	Paridae	cyanistes	Cyanistes_caeruleus	passeriforms	10.3249	822	21
1697	2500	2522	bandit_looc_garnier	71670	2015	8	Male	2	Tetrapoda	Aves	Passeriformes	Passeri	Passeridae	passer	Passer_sp	passeriforms	10.3249	822	21
1698	778	800	bandit_looc_garnier	71670	2015	8	Male	2	Tetrapoda	Mammalia	Rodentia	Myomorpha	Muroidea_fam_gen_sp	Muroidea_fam_gen_sp	Muroidea_fam_gen_sp	muroids	10.3249	822	21
1699	777	799	bandit_looc_garnier	71670	2015	8	Male	2	Tetrapoda	Mammalia	Rodentia	Myomorpha	Muroidea_fam_gen_sp	Muroidea_fam_gen_sp	Muroidea_fam_gen_sp	muroids	10.3249	822	21
1700	793	815	bandit_looc_garnier	71670	2015	8	Male	2	Tetrapoda	Mammalia	Rodentia	Myomorpha	Muroidea_fam_gen_sp	Muroidea_fam_gen_sp	Muroidea_fam_gen_sp	muroids	10.3249	822	21
1701	1048	1070	bandit_looc_garnier	71670	2015	8	Male	2	Tetrapoda	Mammalia	Rodentia	Myomorpha	Muroidea_fam_gen_sp	Muroidea_fam_gen_sp	Muroidea_fam_gen_sp	muroids	10.3249	822	21
1702	1144	1166	bandit_looc_garnier	71670	2015	8	Male	2	Tetrapoda	Mammalia	Rodentia	Myomorpha	Muroidea_fam_gen_sp	Muroidea_fam_gen_sp	Muroidea_fam_gen_sp	muroids	10.3249	822	21
1703	1146	1168	bandit_looc_garnier	71670	2015	8	Male	2	Tetrapoda	Mammalia	Rodentia	Myomorpha	Muroidea_fam_gen_sp	Muroidea_fam_gen_sp	Muroidea_fam_gen_sp	muroids	10.3249	822	21
1704	1209	1231	bandit_looc_garnier	71670	2015	8	Male	2	Tetrapoda	Mammalia	Rodentia	Myomorpha	Muroidea_fam_gen_sp	Muroidea_fam_gen_sp	Muroidea_fam_gen_sp	muroids	10.3249	822	21
1705	1358	1380	bandit_looc_garnier	71670	2015	8	Male	2	Tetrapoda	Mammalia	Rodentia	Myomorpha	Muroidea_fam_gen_sp	Muroidea_fam_gen_sp	Muroidea_fam_gen_sp	muroids	10.3249	822	21
1706	1604	1626	bandit_looc_garnier	71670	2015	8	Male	2	Tetrapoda	Mammalia	Rodentia	Myomorpha	Muroidea_fam_gen_sp	Muroidea_fam_gen_sp	Muroidea_fam_gen_sp	muroids	10.3249	822	21
1707	2317	2339	bandit_looc_garnier	71670	2015	8	Male	2	Tetrapoda	Mammalia	Rodentia	Myomorpha	Muroidea_fam_gen_sp	Muroidea_fam_gen_sp	Muroidea_fam_gen_sp	muroids	10.3249	822	21
1708	2318	2340	bandit_looc_garnier	71670	2015	8	Male	2	Tetrapoda	Mammalia	Rodentia	Myomorpha	Muroidea_fam_gen_sp	Muroidea_fam_gen_sp	Muroidea_fam_gen_sp	muroids	10.3249	822	21
1709	2501	2523	bandit_looc_garnier	71670	2015	8	Male	2	Tetrapoda	Mammalia	Rodentia	Myomorpha	Muroidea_fam_gen_sp	Muroidea_fam_gen_sp	Muroidea_fam_gen_sp	muroids	10.3249	822	21
1710	2585	2607	bandit_looc_garnier	71670	2015	8	Male	2	Tetrapoda	Mammalia	Rodentia	Myomorpha	Muroidea_fam_gen_sp	Muroidea_fam_gen_sp	Muroidea_fam_gen_sp	muroids	10.3249	822	21
1711	3258	3280	bandit_looc_garnier	71670	2015	9	Male	2	Tetrapoda	Mammalia	Rodentia	Myomorpha	Muroidea_fam_gen_sp	Muroidea_fam_gen_sp	Muroidea_fam_gen_sp	muroids	10.3249	822	21
1712	36032	36067	banou_lagorre_corinne_gaston	9140	2019	6	Femelle	6	Tetrapoda	Mammalia	Eulipotyphla	Talpidae	Talpidae	talpa	Talpa_sp	other_mammals	10.5875	988	45
1713	31264	31299	banzao_marianne_monsacre	92340	2017	10	Male	1	Tetrapoda	Mammalia	Eulipotyphla	Soricidae	Soricidae	Soricidae_gen_sp	Soricidae_gen_sp	soricids	11.5229	646	93
1714	18406	18441	banzao_oliveira_sandri_de	93320	2016	6	Male	3	Tetrapoda	Aves	Aves_ord_fam_gen_sp	Aves_ord_fam_gen_sp	Aves_ord_fam_gen_sp	Aves_ord_fam_gen_sp	Aves_ord_fam_gen_sp	other_birds	11.388	645	93
1715	13780	13815	banzao_oliveira_sandri_de	93320	2016	4	Male	3	Tetrapoda	Mammalia	Rodentia	Myomorpha	Muridae	apodemus	Apodemus_sp	muroids	11.388	645	93
1716	13840	13875	banzao_oliveira_sandri_de	93320	2016	4	Male	3	Tetrapoda	Mammalia	Rodentia	Myomorpha	Muridae	apodemus	Apodemus_sp	muroids	11.388	645	93
1717	14020	14055	banzao_oliveira_sandri_de	93320	2016	4	Male	3	Tetrapoda	Mammalia	Rodentia	Myomorpha	Muridae	apodemus	Apodemus_sp	muroids	11.388	645	93
1718	14283	14318	banzao_oliveira_sandri_de	93320	2016	5	Male	3	Tetrapoda	Mammalia	Rodentia	Myomorpha	Muridae	apodemus	Apodemus_sp	muroids	11.388	645	93
1719	15647	15682	banzao_oliveira_sandri_de	93320	2016	5	Male	3	Tetrapoda	Mammalia	Rodentia	Myomorpha	Muridae	apodemus	Apodemus_sp	muroids	11.388	645	93
1720	17321	17356	banzao_oliveira_sandri_de	93320	2016	6	Male	3	Tetrapoda	Mammalia	Rodentia	Myomorpha	Muridae	apodemus	Apodemus_sp	muroids	11.388	645	93
1721	22720	22755	banzao_oliveira_sandri_de	93320	2016	9	Male	3	Tetrapoda	Mammalia	Rodentia	Myomorpha	Muridae	mus	Mus_musculus	muroids	11.388	645	93
1722	18925	18960	barbichette_gisele_verduci	22300	2016	7	Femelle	2	Tetrapoda	Aves	Passeriformes	Passeri	Muscicapidae	erithacus	Erithacus_rubecula	passeriforms	11.2869	985	60
1723	29418	29453	barbotine_guilloteau_elenore	41190	2017	8	Femelle	11	Tetrapoda	Aves	Passeriformes	Passeri	Muscicapidae	erithacus	Erithacus_rubecula	passeriforms	11.0947	674	46
1724	29547	29582	barbotine_guilloteau_elenore	41190	2017	8	Femelle	11	Tetrapoda	Mammalia	Rodentia	Myomorpha	Muridae	apodemus	Apodemus_sp	muroids	11.0947	674	46
1725	11675	11710	barbotine_guilloteau_elenore	41190	2016	3	Femelle	10	Tetrapoda	Mammalia	Rodentia	Myomorpha	Cricetidae	Cricetidae_gen_sp	Cricetidae_gen_sp	cricetids	11.0947	674	51
1726	5288	5310	barbotine_guilloteau_elenore	41190	2015	10	Femelle	9	Tetrapoda	Mammalia	Rodentia	Myomorpha	Cricetidae	Cricetidae_gen_sp	Cricetidae_gen_sp	cricetids	11.0947	674	51
1727	5289	5311	barbotine_guilloteau_elenore	41190	2015	9	Femelle	9	Tetrapoda	Mammalia	Rodentia	Myomorpha	Cricetidae	Cricetidae_gen_sp	Cricetidae_gen_sp	cricetids	11.0947	674	51
1728	8561	8588	barbotine_guilloteau_elenore	41190	2015	11	Femelle	9	Tetrapoda	Mammalia	Rodentia	Myomorpha	Cricetidae	Cricetidae_gen_sp	Cricetidae_gen_sp	cricetids	11.0947	674	51
1729	17833	17868	barbotine_guilloteau_elenore	41190	2016	6	Femelle	10	Tetrapoda	Mammalia	Rodentia	Myomorpha	Cricetidae	Cricetidae_gen_sp	Cricetidae_gen_sp	cricetids	11.0947	674	51
1730	24187	24222	barbotine_guilloteau_elenore	41190	2016	11	Femelle	10	Tetrapoda	Mammalia	Rodentia	Myomorpha	Cricetidae	Cricetidae_gen_sp	Cricetidae_gen_sp	cricetids	11.0947	674	51
1731	24188	24223	barbotine_guilloteau_elenore	41190	2016	11	Femelle	10	Tetrapoda	Mammalia	Rodentia	Myomorpha	Cricetidae	Cricetidae_gen_sp	Cricetidae_gen_sp	cricetids	11.0947	674	51
1732	24749	24784	barbotine_guilloteau_elenore	41190	2016	12	Femelle	10	Tetrapoda	Mammalia	Rodentia	Myomorpha	Cricetidae	Cricetidae_gen_sp	Cricetidae_gen_sp	cricetids	11.0947	674	51
1733	17832	17867	barbotine_guilloteau_elenore	41190	2016	6	Femelle	10	Tetrapoda	Mammalia	Rodentia	Myomorpha	Cricetidae	Cricetidae_gen_sp	Cricetidae_gen_sp	cricetids	11.0947	674	46
1734	21818	21853	barbotine_guilloteau_elenore	41190	2016	8	Femelle	10	Tetrapoda	Mammalia	Rodentia	Myomorpha	Cricetidae	Cricetidae_gen_sp	Cricetidae_gen_sp	cricetids	11.0947	674	46
1735	20774	20809	barbotine_guilloteau_elenore	41190	2016	7	Femelle	10	Tetrapoda	Mammalia	Rodentia	Myomorpha	Cricetidae	Cricetidae_gen_sp	Cricetidae_gen_sp	cricetids	11.0947	674	46
1736	20772	20807	barbotine_guilloteau_elenore	41190	2016	7	Femelle	10	Tetrapoda	Mammalia	Rodentia	Myomorpha	Cricetidae	Cricetidae_gen_sp	Cricetidae_gen_sp	cricetids	11.0947	674	46
1737	32766	32801	barbotine_guilloteau_elenore	41190	2018	6	Femelle	12	Tetrapoda	Mammalia	Rodentia	Myomorpha	Muroidea_fam_gen_sp	Muroidea_fam_gen_sp	Muroidea_fam_gen_sp	muroids	11.0947	674	51
1738	29505	29540	barbotine_guilloteau_elenore	41190	2017	8	Femelle	11	Tetrapoda	Mammalia	Rodentia	Myomorpha	Muroidea_fam_gen_sp	Muroidea_fam_gen_sp	Muroidea_fam_gen_sp	muroids	11.0947	674	51
1739	10418	10453	barbotine_guilloteau_elenore	41190	2016	2	Femelle	10	Tetrapoda	Mammalia	Rodentia	Myomorpha	Muroidea_fam_gen_sp	Muroidea_fam_gen_sp	Muroidea_fam_gen_sp	muroids	11.0947	674	51
1740	8360	8387	barbotine_guilloteau_elenore	41190	2015	11	Femelle	9	Tetrapoda	Mammalia	Rodentia	Myomorpha	Muroidea_fam_gen_sp	Muroidea_fam_gen_sp	Muroidea_fam_gen_sp	muroids	11.0947	674	51
1741	20776	20811	barbotine_guilloteau_elenore	41190	2016	7	Femelle	10	Tetrapoda	Mammalia	Rodentia	Myomorpha	Muroidea_fam_gen_sp	Muroidea_fam_gen_sp	Muroidea_fam_gen_sp	muroids	11.0947	674	51
1742	20765	20800	barbotine_guilloteau_elenore	41190	2016	7	Femelle	10	Tetrapoda	Mammalia	Rodentia	Myomorpha	Muroidea_fam_gen_sp	Muroidea_fam_gen_sp	Muroidea_fam_gen_sp	muroids	11.0947	674	51
1743	20766	20801	barbotine_guilloteau_elenore	41190	2016	7	Femelle	10	Tetrapoda	Mammalia	Rodentia	Myomorpha	Muroidea_fam_gen_sp	Muroidea_fam_gen_sp	Muroidea_fam_gen_sp	muroids	11.0947	674	51
1744	20767	20802	barbotine_guilloteau_elenore	41190	2016	7	Femelle	10	Tetrapoda	Mammalia	Rodentia	Myomorpha	Muroidea_fam_gen_sp	Muroidea_fam_gen_sp	Muroidea_fam_gen_sp	muroids	11.0947	674	51
1745	11740	11775	barbotine_guilloteau_elenore	41190	2016	3	Femelle	10	Tetrapoda	Mammalia	Rodentia	Myomorpha	Muroidea_fam_gen_sp	Muroidea_fam_gen_sp	Muroidea_fam_gen_sp	muroids	11.0947	674	51
1746	24712	24747	barbotine_guilloteau_elenore	41190	2016	12	Femelle	10	Tetrapoda	Mammalia	Rodentia	Myomorpha	Muroidea_fam_gen_sp	Muroidea_fam_gen_sp	Muroidea_fam_gen_sp	muroids	11.0947	674	51
1747	29224	29259	barbotine_guilloteau_elenore	41190	2017	7	Femelle	11	Tetrapoda	Mammalia	Rodentia	Myomorpha	Muroidea_fam_gen_sp	Muroidea_fam_gen_sp	Muroidea_fam_gen_sp	muroids	11.0947	674	51
1748	22060	22095	barbotine_guilloteau_elenore	41190	2016	8	Femelle	10	Tetrapoda	Mammalia	Rodentia	Myomorpha	Muroidea_fam_gen_sp	Muroidea_fam_gen_sp	Muroidea_fam_gen_sp	muroids	11.0947	674	51
1749	30575	30610	barbotine_guilloteau_elenore	41190	2017	10	Femelle	11	Tetrapoda	Mammalia	Rodentia	Myomorpha	Muroidea_fam_gen_sp	Muroidea_fam_gen_sp	Muroidea_fam_gen_sp	muroids	11.0947	674	51
1750	22719	22754	barbotine_guilloteau_elenore	41190	2016	9	Femelle	10	Tetrapoda	Mammalia	Rodentia	Myomorpha	Muroidea_fam_gen_sp	Muroidea_fam_gen_sp	Muroidea_fam_gen_sp	muroids	11.0947	674	51
1751	24285	24320	barbotine_guilloteau_elenore	41190	2016	11	Femelle	10	Tetrapoda	Mammalia	Rodentia	Myomorpha	Muroidea_fam_gen_sp	Muroidea_fam_gen_sp	Muroidea_fam_gen_sp	muroids	11.0947	674	51
1752	27189	27224	barbotine_guilloteau_elenore	41190	2017	5	Femelle	11	Tetrapoda	Mammalia	Rodentia	Myomorpha	Muroidea_fam_gen_sp	Muroidea_fam_gen_sp	Muroidea_fam_gen_sp	muroids	11.0947	674	51
1753	31277	31312	barbotine_guilloteau_elenore	41190	2018	1	Femelle	12	Tetrapoda	Mammalia	Rodentia	Myomorpha	Muroidea_fam_gen_sp	Muroidea_fam_gen_sp	Muroidea_fam_gen_sp	muroids	11.0947	674	46
1754	20769	20804	barbotine_guilloteau_elenore	41190	2016	7	Femelle	10	Tetrapoda	Mammalia	Rodentia	Myomorpha	Muroidea_fam_gen_sp	Muroidea_fam_gen_sp	Muroidea_fam_gen_sp	muroids	11.0947	674	46
1755	20770	20805	barbotine_guilloteau_elenore	41190	2016	7	Femelle	10	Tetrapoda	Mammalia	Rodentia	Myomorpha	Muroidea_fam_gen_sp	Muroidea_fam_gen_sp	Muroidea_fam_gen_sp	muroids	11.0947	674	46
1756	29751	29786	barbotine_guilloteau_elenore	41190	2017	8	Femelle	11	Tetrapoda	Mammalia	Rodentia	Myomorpha	Muroidea_fam_gen_sp	Muroidea_fam_gen_sp	Muroidea_fam_gen_sp	muroids	11.0947	674	46
1757	24321	24356	barbotine_guilloteau_elenore	41190	2016	11	Femelle	10	Tetrapoda	Mammalia	Rodentia	Myomorpha	Muroidea_fam_gen_sp	Muroidea_fam_gen_sp	Muroidea_fam_gen_sp	muroids	11.0947	674	46
1758	21819	21854	barbotine_guilloteau_elenore	41190	2016	8	Femelle	10	Tetrapoda	Mammalia	Rodentia	Myomorpha	Muroidea_fam_gen_sp	Muroidea_fam_gen_sp	Muroidea_fam_gen_sp	muroids	11.0947	674	46
1759	23286	23321	barbotine_guilloteau_elenore	41190	2016	9	Femelle	10	Tetrapoda	Mammalia	Rodentia	Myomorpha	Muroidea_fam_gen_sp	Muroidea_fam_gen_sp	Muroidea_fam_gen_sp	muroids	11.0947	674	46
1760	30574	30609	barbotine_guilloteau_elenore	41190	2017	10	Femelle	11	Tetrapoda	Mammalia	Rodentia	Myomorpha	Muroidea_fam_gen_sp	Muroidea_fam_gen_sp	Muroidea_fam_gen_sp	muroids	11.0947	674	46
1761	13398	13433	barbotine_guilloteau_elenore	41190	2016	4	Femelle	10	Tetrapoda	Mammalia	Rodentia	Myomorpha	Muroidea_fam_gen_sp	Muroidea_fam_gen_sp	Muroidea_fam_gen_sp	muroids	11.0947	674	46
1762	22062	22097	barbotine_guilloteau_elenore	41190	2016	8	Femelle	10	Tetrapoda	Mammalia	Rodentia	Myomorpha	Muroidea_fam_gen_sp	Muroidea_fam_gen_sp	Muroidea_fam_gen_sp	muroids	11.0947	674	46
1763	22061	22096	barbotine_guilloteau_elenore	41190	2016	8	Femelle	10	Tetrapoda	Mammalia	Rodentia	Myomorpha	Muroidea_fam_gen_sp	Muroidea_fam_gen_sp	Muroidea_fam_gen_sp	muroids	11.0947	674	46
1764	2774	2796	barbouille_annie_trebern	29720	2015	7	Male	8	Tetrapoda	Amphibia	Anoura	Anoura	Bufonidae	bufo	Bufo_bufo	amphibians	12.0177	1028	32
1765	4557	4579	barbouille_annie_trebern	29720	2015	9	Male	8	Tetrapoda	Mammalia	Rodentia	Myomorpha	Muroidea_fam_gen_sp	Muroidea_fam_gen_sp	Muroidea_fam_gen_sp	muroids	12.0177	1028	32
1766	10253	10288	barbouille_annie_trebern	29720	2016	1	Male	9	Tetrapoda	Mammalia	Rodentia	Myomorpha	Muridae	apodemus	Apodemus_sp	muroids	12.0177	1028	32
1767	9316	9343	barbouille_annie_trebern	29720	2015	12	Male	8	Tetrapoda	Mammalia	Rodentia	Myomorpha	Cricetidae	ondatra	Ondatra_zibethicus	cricetids	12.0177	1028	32
1768	2945	2967	barbouille_annie_trebern	29720	2015	9	Male	8	Tetrapoda	Mammalia	Rodentia	Myomorpha	Muridae	rattus	Rattus_norvegicus	muroids	12.0177	1028	32
1769	23083	23118	barbouille_philippe_astorgue	76000	2016	9	Male	1	Arthropoda	Hexapoda	Diptera	Diptera_fam_gen_sp	Diptera_fam_gen_sp	Diptera_fam_gen_sp	Diptera_fam_gen_sp	hexapods	10.6152	745	93
1770	23085	23120	barbouille_philippe_astorgue	76000	2016	9	Male	1	Arthropoda	Hexapoda	Diptera	Diptera_fam_gen_sp	Diptera_fam_gen_sp	Diptera_fam_gen_sp	Diptera_fam_gen_sp	hexapods	10.6152	745	93
1771	23087	23122	barbouille_philippe_astorgue	76000	2016	9	Male	1	Arthropoda	Hexapoda	Diptera	Diptera_fam_gen_sp	Diptera_fam_gen_sp	Diptera_fam_gen_sp	Diptera_fam_gen_sp	hexapods	10.6152	745	93
1772	23084	23119	barbouille_philippe_astorgue	76000	2016	9	Male	1	Arthropoda	Hexapoda	Lepidoptera	Lepidoptera_fam_gen_sp	Lepidoptera_fam_gen_sp	Lepidoptera_fam_gen_sp	Lepidoptera_fam_gen_sp	hexapods	10.6152	745	93
1773	23086	23121	barbouille_philippe_astorgue	76000	2016	9	Male	1	Arthropoda	Hexapoda	Orthoptera	Orthoptera_fam_gen_sp	Orthoptera_fam_gen_sp	Orthoptera_fam_gen_sp	Orthoptera_fam_gen_sp	hexapods	10.6152	745	93
1774	1070	1092	barnabe_wilfried_bouiller	39190	2015	5	Male	5	Tetrapoda	Aves	Passeriformes	Passeri	Muscicapidae	phoenicurus	Phoenicurus_ochruros	passeriforms	11.2592	1110	46
1775	1071	1093	barnabe_wilfried_bouiller	39190	2015	7	Male	5	Tetrapoda	Mammalia	Rodentia	Myomorpha	Cricetidae	Cricetidae_gen_sp	Cricetidae_gen_sp	cricetids	11.2592	1110	46
1776	2237	2259	barnabe_wilfried_bouiller	39190	2015	8	Male	5	Tetrapoda	Mammalia	Rodentia	Myomorpha	Cricetidae	Cricetidae_gen_sp	Cricetidae_gen_sp	cricetids	11.2592	1110	46
1777	23587	23622	barrette_marc_edouard_alvarez	7160	2016	10	Femelle	2	Tetrapoda	Mammalia	Rodentia	Myomorpha	Muridae	mus	Mus_musculus	muroids	9.20896	967	25
1778	24201	24236	barrette_marc_edouard_alvarez	7160	2016	11	Femelle	2	Tetrapoda	Mammalia	Rodentia	Myomorpha	Muridae	mus	Mus_musculus	muroids	9.20896	967	25
1779	13387	13422	barrette_marc_edouard_alvarez	7160	2016	4	Femelle	2	Tetrapoda	Mammalia	Rodentia	Myomorpha	Muridae	mus	Mus_musculus	muroids	9.20896	967	25
1780	879	901	basile_annelaure_montmeat	63370	2015	6	Male	3	Tetrapoda	Aves	Passeriformes	Passeri	Turdidae	turdus	Turdus_merula	passeriforms	11.1796	603	90
1781	6263	6285	basile_annelaure_montmeat	63370	2015	10	Male	3	Tetrapoda	Aves	Passeriformes	Passeri	Turdidae	turdus	Turdus_merula	passeriforms	11.1796	603	90
1782	8187	8214	basile_annelaure_montmeat	63370	2015	11	Male	3	Tetrapoda	Aves	Passeriformes	Passeri	Passeridae	passer	Passer_sp	passeriforms	11.1796	603	90
1783	25734	25769	basile_corine_issaly	34500	2017	2	Male	4	Arthropoda	Arachnida	Araneae	Araneae_gen_sp	Araneae_gen_sp	Araneae_gen_sp	Araneae_gen_sp	arachnids	15.0114	573	89
1784	25735	25770	basile_corine_issaly	34500	2017	1	Male	4	Tetrapoda	Aves	Passeriformes	Passeri	Passeridae	passer	Passer_domesticus	passeriforms	15.0114	573	89
1785	25551	25586	basile_corine_issaly	34500	2017	1	Male	4	Tetrapoda	Aves	Passeriformes	Passeri	Passeridae	passer	Passer_sp	passeriforms	15.0114	573	89
1786	15177	15212	bastet_agnes_argentini	54690	2016	4	Femelle	10	Tetrapoda	Aves	Passeriformes	Passeri	Fringillidae	pyrrhula	Pyrrhula_pyrrhula	passeriforms	9.8455	779	84
1787	20833	20868	bastet_agnes_argentini	54690	2016	8	Femelle	10	Tetrapoda	Aves	Passeriformes	Passeri	Paridae	parus	Parus_major	passeriforms	9.8455	779	84
1788	21383	21418	bastet_agnes_argentini	54690	2016	8	Femelle	10	Tetrapoda	Aves	Passeriformes	Passeri	Troglodytidae	troglodytes	Troglodytes_troglodytes	passeriforms	9.8455	779	84
1789	10110	10137	bastet_agnes_argentini	54690	2016	1	Femelle	10	Tetrapoda	Mammalia	Rodentia	Myomorpha	Cricetidae	microtus	Microtus_arvalis	cricetids	9.8455	779	84
1790	17527	17562	bastet_agnes_argentini	54690	2016	6	Femelle	10	Tetrapoda	Mammalia	Rodentia	Myomorpha	Cricetidae	Cricetidae_gen_sp	Cricetidae_gen_sp	cricetids	9.8455	779	84
1791	20231	20266	bastet_agnes_argentini	54690	2016	7	Femelle	10	Tetrapoda	Mammalia	Rodentia	Myomorpha	Cricetidae	Cricetidae_gen_sp	Cricetidae_gen_sp	cricetids	9.8455	779	84
1792	20430	20465	bastet_agnes_argentini	54690	2016	7	Femelle	10	Tetrapoda	Mammalia	Rodentia	Myomorpha	Cricetidae	Cricetidae_gen_sp	Cricetidae_gen_sp	cricetids	9.8455	779	84
1793	20431	20466	bastet_agnes_argentini	54690	2016	7	Femelle	10	Tetrapoda	Mammalia	Rodentia	Myomorpha	Cricetidae	Cricetidae_gen_sp	Cricetidae_gen_sp	cricetids	9.8455	779	84
1794	20834	20869	bastet_agnes_argentini	54690	2016	8	Femelle	10	Tetrapoda	Mammalia	Rodentia	Myomorpha	Cricetidae	Cricetidae_gen_sp	Cricetidae_gen_sp	cricetids	9.8455	779	84
1795	21384	21419	bastet_agnes_argentini	54690	2016	8	Femelle	10	Tetrapoda	Mammalia	Rodentia	Myomorpha	Cricetidae	arvicola	Arvicola_sp	cricetids	9.8455	779	84
1796	7886	7913	bastet_agnes_argentini	54690	2015	11	Femelle	9	Tetrapoda	Mammalia	Mammalia_ord_fam_gen_sp	Mammalia_ord_fam_gen_sp	Mammalia_ord_fam_gen_sp	Mammalia_ord_fam_gen_sp	Mammalia_ord_fam_gen_sp	other_mammals	9.8455	779	84
1797	4797	4819	bastet_agnes_argentini	54690	2015	9	Femelle	9	Tetrapoda	Mammalia	Rodentia	Myomorpha	Muridae	apodemus	Apodemus_sp	muroids	9.8455	779	84
1798	6300	6322	bastet_agnes_argentini	54690	2015	10	Femelle	9	Tetrapoda	Mammalia	Rodentia	Myomorpha	Muridae	apodemus	Apodemus_sp	muroids	9.8455	779	84
1799	19605	19640	bastet_agnes_argentini	54690	2016	7	Femelle	10	Tetrapoda	Mammalia	Rodentia	Myomorpha	Muridae	apodemus	Apodemus_sp	muroids	9.8455	779	84
1800	19606	19641	bastet_agnes_argentini	54690	2016	7	Femelle	10	Tetrapoda	Mammalia	Rodentia	Myomorpha	Muridae	apodemus	Apodemus_sp	muroids	9.8455	779	84
1801	9760	9787	bastet_agnes_argentini	54690	2015	12	Femelle	9	Tetrapoda	Mammalia	Rodentia	Myomorpha	Cricetidae	Cricetidae_gen_sp	Cricetidae_gen_sp	cricetids	9.8455	779	84
1802	15178	15213	bastet_agnes_argentini	54690	2016	5	Femelle	10	Tetrapoda	Mammalia	Rodentia	Myomorpha	Cricetidae	Cricetidae_gen_sp	Cricetidae_gen_sp	cricetids	9.8455	779	84
1803	10109	10136	bastet_agnes_argentini	54690	2016	1	Femelle	10	Tetrapoda	Mammalia	Rodentia	Myomorpha	Muroidea_fam_gen_sp	Muroidea_fam_gen_sp	Muroidea_fam_gen_sp	muroids	9.8455	779	84
1804	29274	29309	bastet_catherine_bocquin	58000	2017	7	Femelle	NA	Tetrapoda	Mammalia	Rodentia	Myomorpha	Muroidea_fam_gen_sp	Muroidea_fam_gen_sp	Muroidea_fam_gen_sp	muroids	10.8083	773	65
1805	32476	32511	bastet_emmanuelle_figueras	34270	2018	5	Femelle	2	Tetrapoda	Squamata	Squamata	Lacertilia	Phyllodactylidae	tarentola	Tarentola_mauritanica	lacertilia	13.6142	718	34
1806	NA	NA	bastet_marc_lucile_ottavioli_jaworski	79510	2022	7	Femelle	0	Arthropoda	Arachnida	Araneae	Araneae_gen_sp	Araneae_gen_sp	Araneae_gen_sp	Araneae_gen_sp	arachnids	12.287	789	46
1807	NA	NA	bastet_marc_lucile_ottavioli_jaworski	79510	2022	7	Femelle	0	Arthropoda	Arachnida	Araneae	Araneae_gen_sp	Araneae_gen_sp	Araneae_gen_sp	Araneae_gen_sp	arachnids	12.287	789	46
1808	NA	NA	bastet_marc_lucile_ottavioli_jaworski	79510	2022	5	Femelle	0	Arthropoda	Arachnida	Araneae	Araneae_gen_sp	Araneae_gen_sp	Araneae_gen_sp	Araneae_gen_sp	arachnids	12.287	789	46
1809	NA	NA	bastet_marc_lucile_ottavioli_jaworski	79510	2022	8	Femelle	0	Arthropoda	Arthropoda	Arthropoda_ord_fam_gen_sp	Arthropoda_ord_fam_gen_sp	Arthropoda_ord_fam_gen_sp	Arthropoda_ord_fam_gen_sp	Arthropoda_ord_fam_gen_sp	chilopods	12.287	789	46
1810	NA	NA	bastet_marc_lucile_ottavioli_jaworski	79510	2022	8	Femelle	0	Arthropoda	Arthropoda	Arthropoda_ord_fam_gen_sp	Arthropoda_ord_fam_gen_sp	Arthropoda_ord_fam_gen_sp	Arthropoda_ord_fam_gen_sp	Arthropoda_ord_fam_gen_sp	arthropods	12.287	789	46
1811	NA	NA	bastet_marc_lucile_ottavioli_jaworski	79510	2022	5	Femelle	0	Arthropoda	Arthropoda	Arthropoda_ord_fam_gen_sp	Arthropoda_ord_fam_gen_sp	Arthropoda_ord_fam_gen_sp	Arthropoda_ord_fam_gen_sp	Arthropoda_ord_fam_gen_sp	arthropods	12.287	789	46
1812	NA	NA	bastet_marc_lucile_ottavioli_jaworski	79510	2022	8	Femelle	0	Arthropoda	Arthropoda	Arthropoda_ord_fam_gen_sp	Arthropoda_ord_fam_gen_sp	Arthropoda_ord_fam_gen_sp	Arthropoda_ord_fam_gen_sp	Arthropoda_ord_fam_gen_sp	arthropods	12.287	789	46
1813	NA	NA	bastet_marc_lucile_ottavioli_jaworski	79510	2022	7	Femelle	0	Arthropoda	Arthropoda	Arthropoda_ord_fam_gen_sp	Arthropoda_ord_fam_gen_sp	Arthropoda_ord_fam_gen_sp	Arthropoda_ord_fam_gen_sp	Arthropoda_ord_fam_gen_sp	arthropods	12.287	789	46
1814	NA	NA	bastet_marc_lucile_ottavioli_jaworski	79510	2022	2	Femelle	0	Arthropoda	Arthropoda	Arthropoda_ord_fam_gen_sp	Arthropoda_ord_fam_gen_sp	Arthropoda_ord_fam_gen_sp	Arthropoda_ord_fam_gen_sp	Arthropoda_ord_fam_gen_sp	arthropods	12.287	789	46
1815	NA	NA	bastet_marc_lucile_ottavioli_jaworski	79510	2022	5	Femelle	0	Arthropoda	Arthropoda	Arthropoda_ord_fam_gen_sp	Arthropoda_ord_fam_gen_sp	Arthropoda_ord_fam_gen_sp	Arthropoda_ord_fam_gen_sp	Arthropoda_ord_fam_gen_sp	arthropods	12.287	789	46
1816	NA	NA	bastet_marc_lucile_ottavioli_jaworski	79510	2022	5	Femelle	0	Arthropoda	Arthropoda	Arthropoda_ord_fam_gen_sp	Arthropoda_ord_fam_gen_sp	Arthropoda_ord_fam_gen_sp	Arthropoda_ord_fam_gen_sp	Arthropoda_ord_fam_gen_sp	arthropods	12.287	789	46
1817	NA	NA	bastet_marc_lucile_ottavioli_jaworski	79510	2021	11	Femelle	0	Tetrapoda	Aves	Passeriformes	Passeri	Paridae	parus	Parus_major	passeriforms	12.287	789	46
1818	NA	NA	bastet_marc_lucile_ottavioli_jaworski	79510	2022	7	Femelle	0	Tetrapoda	Aves	Aves_ord_fam_gen_sp	Aves_ord_fam_gen_sp	Aves_ord_fam_gen_sp	Aves_ord_fam_gen_sp	Aves_ord_fam_gen_sp	other_birds	12.287	789	46
1819	NA	NA	bastet_marc_lucile_ottavioli_jaworski	79510	2021	11	Femelle	0	Tetrapoda	Aves	Passeriformes	Passeri	Phylloscopidae	phylloscopus	Phylloscopus_collybita	passeriforms	12.287	789	46
1820	NA	NA	bastet_marc_lucile_ottavioli_jaworski	79510	2022	5	Femelle	0	Arthropoda	Hexapoda	Coleoptera_ord_fam_gen_sp	Coleoptera_ord_fam_gen_sp	Coleoptera_ord_fam_gen_sp	Coleoptera_ord_fam_gen_sp	Coleoptera_ord_fam_gen_sp	hexapods	12.287	789	46
1821	NA	NA	bastet_marc_lucile_ottavioli_jaworski	79510	2022	4	Femelle	0	Arthropoda	Hexapoda	Coleoptera_ord_fam_gen_sp	Coleoptera_ord_fam_gen_sp	Coleoptera_ord_fam_gen_sp	Coleoptera_ord_fam_gen_sp	Coleoptera_ord_fam_gen_sp	hexapods	12.287	789	46
1822	NA	NA	bastet_marc_lucile_ottavioli_jaworski	79510	2021	12	Femelle	0	Arthropoda	Hexapoda	Diptera	Diptera_fam_gen_sp	Diptera_fam_gen_sp	Diptera_fam_gen_sp	Diptera_fam_gen_sp	hexapods	12.287	789	46
1823	NA	NA	bastet_marc_lucile_ottavioli_jaworski	79510	2022	2	Femelle	0	Arthropoda	Hexapoda	Diptera	Diptera_fam_gen_sp	Diptera_fam_gen_sp	Diptera_fam_gen_sp	Diptera_fam_gen_sp	hexapods	12.287	789	46
1824	NA	NA	bastet_marc_lucile_ottavioli_jaworski	79510	2022	2	Femelle	0	Arthropoda	Hexapoda	Diptera	Diptera_fam_gen_sp	Diptera_fam_gen_sp	Diptera_fam_gen_sp	Diptera_fam_gen_sp	hexapods	12.287	789	46
1825	NA	NA	bastet_marc_lucile_ottavioli_jaworski	79510	2022	5	Femelle	0	Arthropoda	Hexapoda	Diptera	Diptera_fam_gen_sp	Diptera_fam_gen_sp	Diptera_fam_gen_sp	Diptera_fam_gen_sp	hexapods	12.287	789	46
1826	NA	NA	bastet_marc_lucile_ottavioli_jaworski	79510	2022	2	Femelle	0	Arthropoda	Hexapoda	Diptera	Diptera_fam_gen_sp	Diptera_fam_gen_sp	Diptera_fam_gen_sp	Diptera_fam_gen_sp	hexapods	12.287	789	46
1827	NA	NA	bastet_marc_lucile_ottavioli_jaworski	79510	2021	12	Femelle	0	Arthropoda	Hexapoda	Diptera	Diptera_fam_gen_sp	Diptera_fam_gen_sp	Diptera_fam_gen_sp	Diptera_fam_gen_sp	hexapods	12.287	789	46
1828	NA	NA	bastet_marc_lucile_ottavioli_jaworski	79510	2022	5	Femelle	0	Arthropoda	Hexapoda	Diptera	Diptera_fam_gen_sp	Diptera_fam_gen_sp	Diptera_fam_gen_sp	Diptera_fam_gen_sp	hexapods	12.287	789	46
1829	NA	NA	bastet_marc_lucile_ottavioli_jaworski	79510	2021	11	Femelle	0	Arthropoda	Hexapoda	Diptera	Diptera_fam_gen_sp	Diptera_fam_gen_sp	Diptera_fam_gen_sp	Diptera_fam_gen_sp	hexapods	12.287	789	46
1830	NA	NA	bastet_marc_lucile_ottavioli_jaworski	79510	2021	11	Femelle	0	Arthropoda	Hexapoda	Diptera	Diptera_fam_gen_sp	Diptera_fam_gen_sp	Diptera_fam_gen_sp	Diptera_fam_gen_sp	hexapods	12.287	789	46
1831	NA	NA	bastet_marc_lucile_ottavioli_jaworski	79510	2022	7	Femelle	0	Arthropoda	Hexapoda	Lepidoptera	Lepidoptera_fam_gen_sp	Lepidoptera_fam_gen_sp	Lepidoptera_fam_gen_sp	Lepidoptera_fam_gen_sp	hexapods	12.287	789	46
1832	NA	NA	bastet_marc_lucile_ottavioli_jaworski	79510	2022	8	Femelle	0	Arthropoda	Hexapoda	Lepidoptera	Lepidoptera_fam_gen_sp	Lepidoptera_fam_gen_sp	Lepidoptera_fam_gen_sp	Lepidoptera_fam_gen_sp	hexapods	12.287	789	46
1833	NA	NA	bastet_marc_lucile_ottavioli_jaworski	79510	2022	7	Femelle	0	Arthropoda	Hexapoda	Lepidoptera	Lepidoptera_fam_gen_sp	Lepidoptera_fam_gen_sp	Lepidoptera_fam_gen_sp	Lepidoptera_fam_gen_sp	hexapods	12.287	789	46
1834	NA	NA	bastet_marc_lucile_ottavioli_jaworski	79510	2022	8	Femelle	0	Arthropoda	Hexapoda	Lepidoptera	Lepidoptera_fam_gen_sp	Lepidoptera_fam_gen_sp	Lepidoptera_fam_gen_sp	Lepidoptera_fam_gen_sp	hexapods	12.287	789	46
1835	NA	NA	bastet_marc_lucile_ottavioli_jaworski	79510	2021	12	Femelle	0	Arthropoda	Hexapoda	Lepidoptera	Lepidoptera_fam_gen_sp	Lepidoptera_fam_gen_sp	Lepidoptera_fam_gen_sp	Lepidoptera_fam_gen_sp	hexapods	12.287	789	46
1836	NA	NA	bastet_marc_lucile_ottavioli_jaworski	79510	2022	1	Femelle	0	Arthropoda	Hexapoda	Lepidoptera	Lepidoptera_fam_gen_sp	Lepidoptera_fam_gen_sp	Lepidoptera_fam_gen_sp	Lepidoptera_fam_gen_sp	hexapods	12.287	789	46
1837	NA	NA	bastet_marc_lucile_ottavioli_jaworski	79510	2021	12	Femelle	0	Arthropoda	Hexapoda	Lepidoptera	Lepidoptera_fam_gen_sp	Lepidoptera_fam_gen_sp	Lepidoptera_fam_gen_sp	Lepidoptera_fam_gen_sp	hexapods	12.287	789	46
1838	NA	NA	bastet_marc_lucile_ottavioli_jaworski	79510	2022	2	Femelle	0	Arthropoda	Hexapoda	Lepidoptera	Lepidoptera_fam_gen_sp	Lepidoptera_fam_gen_sp	Lepidoptera_fam_gen_sp	Lepidoptera_fam_gen_sp	hexapods	12.287	789	46
1839	NA	NA	bastet_marc_lucile_ottavioli_jaworski	79510	2022	1	Femelle	0	Arthropoda	Hexapoda	Lepidoptera	Lepidoptera_fam_gen_sp	Lepidoptera_fam_gen_sp	Lepidoptera_fam_gen_sp	Lepidoptera_fam_gen_sp	hexapods	12.287	789	46
1840	NA	NA	bastet_marc_lucile_ottavioli_jaworski	79510	2022	4	Femelle	0	Arthropoda	Hexapoda	Lepidoptera	Lepidoptera_fam_gen_sp	Lepidoptera_fam_gen_sp	Lepidoptera_fam_gen_sp	Lepidoptera_fam_gen_sp	hexapods	12.287	789	46
1841	NA	NA	bastet_marc_lucile_ottavioli_jaworski	79510	2022	4	Femelle	0	Arthropoda	Hexapoda	Lepidoptera	Lepidoptera_fam_gen_sp	Lepidoptera_fam_gen_sp	Lepidoptera_fam_gen_sp	Lepidoptera_fam_gen_sp	hexapods	12.287	789	46
1842	NA	NA	bastet_marc_lucile_ottavioli_jaworski	79510	2022	2	Femelle	0	Arthropoda	Hexapoda	Lepidoptera	Lepidoptera_fam_gen_sp	Lepidoptera_fam_gen_sp	Lepidoptera_fam_gen_sp	Lepidoptera_fam_gen_sp	hexapods	12.287	789	46
1843	NA	NA	bastet_marc_lucile_ottavioli_jaworski	79510	2022	2	Femelle	0	Arthropoda	Hexapoda	Lepidoptera	Lepidoptera_fam_gen_sp	Lepidoptera_fam_gen_sp	Lepidoptera_fam_gen_sp	Lepidoptera_fam_gen_sp	hexapods	12.287	789	46
1844	NA	NA	bastet_marc_lucile_ottavioli_jaworski	79510	2022	2	Femelle	0	Arthropoda	Hexapoda	Lepidoptera	Lepidoptera_fam_gen_sp	Lepidoptera_fam_gen_sp	Lepidoptera_fam_gen_sp	Lepidoptera_fam_gen_sp	hexapods	12.287	789	46
1845	NA	NA	bastet_marc_lucile_ottavioli_jaworski	79510	2022	2	Femelle	0	Arthropoda	Hexapoda	Lepidoptera	Lepidoptera_fam_gen_sp	Lepidoptera_fam_gen_sp	Lepidoptera_fam_gen_sp	Lepidoptera_fam_gen_sp	hexapods	12.287	789	46
1846	NA	NA	bastet_marc_lucile_ottavioli_jaworski	79510	2022	5	Femelle	0	Arthropoda	Hexapoda	Lepidoptera	Lepidoptera_fam_gen_sp	Lepidoptera_fam_gen_sp	Lepidoptera_fam_gen_sp	Lepidoptera_fam_gen_sp	hexapods	12.287	789	46
1847	NA	NA	bastet_marc_lucile_ottavioli_jaworski	79510	2022	4	Femelle	0	Arthropoda	Hexapoda	Lepidoptera	Lepidoptera_fam_gen_sp	Lepidoptera_fam_gen_sp	Lepidoptera_fam_gen_sp	Lepidoptera_fam_gen_sp	hexapods	12.287	789	46
1848	NA	NA	bastet_marc_lucile_ottavioli_jaworski	79510	2022	3	Femelle	0	Arthropoda	Hexapoda	Lepidoptera	Lepidoptera_fam_gen_sp	Lepidoptera_fam_gen_sp	Lepidoptera_fam_gen_sp	Lepidoptera_fam_gen_sp	hexapods	12.287	789	46
1849	NA	NA	bastet_marc_lucile_ottavioli_jaworski	79510	2021	12	Femelle	0	Arthropoda	Hexapoda	Lepidoptera	Lepidoptera_fam_gen_sp	Lepidoptera_fam_gen_sp	Lepidoptera_fam_gen_sp	Lepidoptera_fam_gen_sp	hexapods	12.287	789	46
1850	NA	NA	bastet_marc_lucile_ottavioli_jaworski	79510	2022	2	Femelle	0	Arthropoda	Hexapoda	Lepidoptera	Lepidoptera_fam_gen_sp	Lepidoptera_fam_gen_sp	Lepidoptera_fam_gen_sp	Lepidoptera_fam_gen_sp	hexapods	12.287	789	46
1851	NA	NA	bastet_marc_lucile_ottavioli_jaworski	79510	2022	4	Femelle	0	Arthropoda	Hexapoda	Lepidoptera	Lepidoptera_fam_gen_sp	Lepidoptera_fam_gen_sp	Lepidoptera_fam_gen_sp	Lepidoptera_fam_gen_sp	hexapods	12.287	789	46
1852	NA	NA	bastet_marc_lucile_ottavioli_jaworski	79510	2022	2	Femelle	0	Arthropoda	Hexapoda	Lepidoptera	Lepidoptera_fam_gen_sp	Lepidoptera_fam_gen_sp	Lepidoptera_fam_gen_sp	Lepidoptera_fam_gen_sp	hexapods	12.287	789	46
1853	NA	NA	bastet_marc_lucile_ottavioli_jaworski	79510	2022	5	Femelle	0	Arthropoda	Hexapoda	Lepidoptera	Lepidoptera_fam_gen_sp	Lepidoptera_fam_gen_sp	Lepidoptera_fam_gen_sp	Lepidoptera_fam_gen_sp	hexapods	12.287	789	46
1854	NA	NA	bastet_marc_lucile_ottavioli_jaworski	79510	2022	5	Femelle	0	Arthropoda	Hexapoda	Lepidoptera	Lepidoptera_fam_gen_sp	Lepidoptera_fam_gen_sp	Lepidoptera_fam_gen_sp	Lepidoptera_fam_gen_sp	hexapods	12.287	789	46
1855	NA	NA	bastet_marc_lucile_ottavioli_jaworski	79510	2022	4	Femelle	0	Arthropoda	Hexapoda	Lepidoptera	Lepidoptera_fam_gen_sp	Lepidoptera_fam_gen_sp	Lepidoptera_fam_gen_sp	Lepidoptera_fam_gen_sp	hexapods	12.287	789	46
1856	NA	NA	bastet_marc_lucile_ottavioli_jaworski	79510	2022	2	Femelle	0	Arthropoda	Hexapoda	Lepidoptera	Lepidoptera_fam_gen_sp	Lepidoptera_fam_gen_sp	Lepidoptera_fam_gen_sp	Lepidoptera_fam_gen_sp	hexapods	12.287	789	46
1857	NA	NA	bastet_marc_lucile_ottavioli_jaworski	79510	2022	3	Femelle	0	Arthropoda	Hexapoda	Lepidoptera	Lepidoptera_fam_gen_sp	Lepidoptera_fam_gen_sp	Lepidoptera_fam_gen_sp	Lepidoptera_fam_gen_sp	hexapods	12.287	789	46
1858	NA	NA	bastet_marc_lucile_ottavioli_jaworski	79510	2022	2	Femelle	0	Arthropoda	Hexapoda	Lepidoptera	Lepidoptera_fam_gen_sp	Lepidoptera_fam_gen_sp	Lepidoptera_fam_gen_sp	Lepidoptera_fam_gen_sp	hexapods	12.287	789	46
1859	NA	NA	bastet_marc_lucile_ottavioli_jaworski	79510	2022	4	Femelle	0	Arthropoda	Hexapoda	Lepidoptera	Lepidoptera_fam_gen_sp	Lepidoptera_fam_gen_sp	Lepidoptera_fam_gen_sp	Lepidoptera_fam_gen_sp	hexapods	12.287	789	46
1860	NA	NA	bastet_marc_lucile_ottavioli_jaworski	79510	2022	4	Femelle	0	Arthropoda	Hexapoda	Lepidoptera	Lepidoptera_fam_gen_sp	Lepidoptera_fam_gen_sp	Lepidoptera_fam_gen_sp	Lepidoptera_fam_gen_sp	hexapods	12.287	789	46
1861	NA	NA	bastet_marc_lucile_ottavioli_jaworski	79510	2022	3	Femelle	0	Arthropoda	Hexapoda	Lepidoptera	Lepidoptera_fam_gen_sp	Lepidoptera_fam_gen_sp	Lepidoptera_fam_gen_sp	Lepidoptera_fam_gen_sp	hexapods	12.287	789	46
1862	NA	NA	bastet_marc_lucile_ottavioli_jaworski	79510	2022	5	Femelle	0	Arthropoda	Hexapoda	Lepidoptera	Lepidoptera_fam_gen_sp	Lepidoptera_fam_gen_sp	Lepidoptera_fam_gen_sp	Lepidoptera_fam_gen_sp	hexapods	12.287	789	46
1863	NA	NA	bastet_marc_lucile_ottavioli_jaworski	79510	2022	4	Femelle	0	Arthropoda	Hexapoda	Lepidoptera	Lepidoptera_fam_gen_sp	Lepidoptera_fam_gen_sp	Lepidoptera_fam_gen_sp	Lepidoptera_fam_gen_sp	hexapods	12.287	789	46
1864	NA	NA	bastet_marc_lucile_ottavioli_jaworski	79510	2022	5	Femelle	0	Arthropoda	Hexapoda	Lepidoptera	Lepidoptera_fam_gen_sp	Lepidoptera_fam_gen_sp	Lepidoptera_fam_gen_sp	Lepidoptera_fam_gen_sp	hexapods	12.287	789	46
1865	NA	NA	bastet_marc_lucile_ottavioli_jaworski	79510	2022	4	Femelle	0	Arthropoda	Hexapoda	Lepidoptera	Lepidoptera_fam_gen_sp	Lepidoptera_fam_gen_sp	Lepidoptera_fam_gen_sp	Lepidoptera_fam_gen_sp	hexapods	12.287	789	46
1866	NA	NA	bastet_marc_lucile_ottavioli_jaworski	79510	2022	4	Femelle	0	Arthropoda	Hexapoda	Lepidoptera	Lepidoptera_fam_gen_sp	Lepidoptera_fam_gen_sp	Lepidoptera_fam_gen_sp	Lepidoptera_fam_gen_sp	hexapods	12.287	789	46
1867	NA	NA	bastet_marc_lucile_ottavioli_jaworski	79510	2022	5	Femelle	0	Arthropoda	Hexapoda	Lepidoptera	Lepidoptera_fam_gen_sp	Lepidoptera_fam_gen_sp	Lepidoptera_fam_gen_sp	Lepidoptera_fam_gen_sp	hexapods	12.287	789	46
1868	NA	NA	bastet_marc_lucile_ottavioli_jaworski	79510	2022	2	Femelle	0	Arthropoda	Hexapoda	Lepidoptera	Lepidoptera_fam_gen_sp	Lepidoptera_fam_gen_sp	Lepidoptera_fam_gen_sp	Lepidoptera_fam_gen_sp	hexapods	12.287	789	46
1869	NA	NA	bastet_marc_lucile_ottavioli_jaworski	79510	2022	4	Femelle	0	Arthropoda	Hexapoda	Lepidoptera	Lepidoptera_fam_gen_sp	Lepidoptera_fam_gen_sp	Lepidoptera_fam_gen_sp	Lepidoptera_fam_gen_sp	hexapods	12.287	789	46
1870	NA	NA	bastet_marc_lucile_ottavioli_jaworski	79510	2021	12	Femelle	0	Arthropoda	Hexapoda	Lepidoptera	Lepidoptera_fam_gen_sp	Lepidoptera_fam_gen_sp	Lepidoptera_fam_gen_sp	Lepidoptera_fam_gen_sp	hexapods	12.287	789	46
1871	NA	NA	bastet_marc_lucile_ottavioli_jaworski	79510	2022	2	Femelle	0	Arthropoda	Hexapoda	Lepidoptera	Lepidoptera_fam_gen_sp	Lepidoptera_fam_gen_sp	Lepidoptera_fam_gen_sp	Lepidoptera_fam_gen_sp	hexapods	12.287	789	46
1872	NA	NA	bastet_marc_lucile_ottavioli_jaworski	79510	2022	4	Femelle	0	Arthropoda	Hexapoda	Lepidoptera	Lepidoptera_fam_gen_sp	Lepidoptera_fam_gen_sp	Lepidoptera_fam_gen_sp	Lepidoptera_fam_gen_sp	hexapods	12.287	789	46
1873	NA	NA	bastet_marc_lucile_ottavioli_jaworski	79510	2022	7	Femelle	0	Arthropoda	Hexapoda	Lepidoptera	Lepidoptera_fam_gen_sp	Lepidoptera_fam_gen_sp	Lepidoptera_fam_gen_sp	Lepidoptera_fam_gen_sp	hexapods	12.287	789	46
1874	NA	NA	bastet_marc_lucile_ottavioli_jaworski	79510	2022	4	Femelle	0	Arthropoda	Hexapoda	Lepidoptera	Lepidoptera_fam_gen_sp	Lepidoptera_fam_gen_sp	Lepidoptera_fam_gen_sp	Lepidoptera_fam_gen_sp	hexapods	12.287	789	46
1875	NA	NA	bastet_marc_lucile_ottavioli_jaworski	79510	2022	8	Femelle	0	Arthropoda	Hexapoda	Lepidoptera	Lepidoptera_fam_gen_sp	Lepidoptera_fam_gen_sp	Lepidoptera_fam_gen_sp	Lepidoptera_fam_gen_sp	hexapods	12.287	789	46
1876	NA	NA	bastet_marc_lucile_ottavioli_jaworski	79510	2022	4	Femelle	0	Arthropoda	Hexapoda	Lepidoptera	Lepidoptera_fam_gen_sp	Lepidoptera_fam_gen_sp	Lepidoptera_fam_gen_sp	Lepidoptera_fam_gen_sp	hexapods	12.287	789	46
1877	NA	NA	bastet_marc_lucile_ottavioli_jaworski	79510	2022	7	Femelle	0	Arthropoda	Hexapoda	Lepidoptera	Lepidoptera_fam_gen_sp	Lepidoptera_fam_gen_sp	Lepidoptera_fam_gen_sp	Lepidoptera_fam_gen_sp	hexapods	12.287	789	46
1878	NA	NA	bastet_marc_lucile_ottavioli_jaworski	79510	2022	6	Femelle	0	Arthropoda	Hexapoda	Lepidoptera	Lepidoptera_fam_gen_sp	Lepidoptera_fam_gen_sp	Lepidoptera_fam_gen_sp	Lepidoptera_fam_gen_sp	hexapods	12.287	789	46
1879	NA	NA	bastet_marc_lucile_ottavioli_jaworski	79510	2022	7	Femelle	0	Arthropoda	Hexapoda	Lepidoptera	Lepidoptera_fam_gen_sp	Lepidoptera_fam_gen_sp	Lepidoptera_fam_gen_sp	Lepidoptera_fam_gen_sp	hexapods	12.287	789	46
1880	NA	NA	bastet_marc_lucile_ottavioli_jaworski	79510	2022	6	Femelle	0	Arthropoda	Hexapoda	Lepidoptera	Lepidoptera_fam_gen_sp	Lepidoptera_fam_gen_sp	Lepidoptera_fam_gen_sp	Lepidoptera_fam_gen_sp	hexapods	12.287	789	46
1881	NA	NA	bastet_marc_lucile_ottavioli_jaworski	79510	2022	8	Femelle	0	Arthropoda	Hexapoda	Lepidoptera	Lepidoptera_fam_gen_sp	Lepidoptera_fam_gen_sp	Lepidoptera_fam_gen_sp	Lepidoptera_fam_gen_sp	hexapods	12.287	789	46
1882	NA	NA	bastet_marc_lucile_ottavioli_jaworski	79510	2022	5	Femelle	0	Arthropoda	Hexapoda	Lepidoptera	Lepidoptera_fam_gen_sp	Lepidoptera_fam_gen_sp	Lepidoptera_fam_gen_sp	Lepidoptera_fam_gen_sp	hexapods	12.287	789	46
1883	NA	NA	bastet_marc_lucile_ottavioli_jaworski	79510	2022	4	Femelle	0	Arthropoda	Hexapoda	Lepidoptera	Lepidoptera_fam_gen_sp	Lepidoptera_fam_gen_sp	Lepidoptera_fam_gen_sp	Lepidoptera_fam_gen_sp	hexapods	12.287	789	46
1884	NA	NA	bastet_marc_lucile_ottavioli_jaworski	79510	2022	7	Femelle	0	Arthropoda	Hexapoda	Lepidoptera	Lepidoptera_fam_gen_sp	Lepidoptera_fam_gen_sp	Lepidoptera_fam_gen_sp	Lepidoptera_fam_gen_sp	hexapods	12.287	789	46
1885	NA	NA	bastet_marc_lucile_ottavioli_jaworski	79510	2022	6	Femelle	0	Arthropoda	Hexapoda	Lepidoptera	Lepidoptera_fam_gen_sp	Lepidoptera_fam_gen_sp	Lepidoptera_fam_gen_sp	Lepidoptera_fam_gen_sp	hexapods	12.287	789	46
1886	NA	NA	bastet_marc_lucile_ottavioli_jaworski	79510	2022	8	Femelle	0	Arthropoda	Hexapoda	Lepidoptera	Lepidoptera_fam_gen_sp	Lepidoptera_fam_gen_sp	Lepidoptera_fam_gen_sp	Lepidoptera_fam_gen_sp	hexapods	12.287	789	46
1887	NA	NA	bastet_marc_lucile_ottavioli_jaworski	79510	2022	7	Femelle	0	Arthropoda	Hexapoda	Lepidoptera	Lepidoptera_fam_gen_sp	Lepidoptera_fam_gen_sp	Lepidoptera_fam_gen_sp	Lepidoptera_fam_gen_sp	hexapods	12.287	789	46
1888	NA	NA	bastet_marc_lucile_ottavioli_jaworski	79510	2022	8	Femelle	0	Arthropoda	Hexapoda	Lepidoptera	Lepidoptera_fam_gen_sp	Lepidoptera_fam_gen_sp	Lepidoptera_fam_gen_sp	Lepidoptera_fam_gen_sp	hexapods	12.287	789	46
1889	NA	NA	bastet_marc_lucile_ottavioli_jaworski	79510	2022	6	Femelle	0	Arthropoda	Hexapoda	Lepidoptera	Lepidoptera_fam_gen_sp	Lepidoptera_fam_gen_sp	Lepidoptera_fam_gen_sp	Lepidoptera_fam_gen_sp	hexapods	12.287	789	46
1890	NA	NA	bastet_marc_lucile_ottavioli_jaworski	79510	2022	7	Femelle	0	Arthropoda	Hexapoda	Lepidoptera	Lepidoptera_fam_gen_sp	Lepidoptera_fam_gen_sp	Lepidoptera_fam_gen_sp	Lepidoptera_fam_gen_sp	hexapods	12.287	789	46
1891	NA	NA	bastet_marc_lucile_ottavioli_jaworski	79510	2022	4	Femelle	0	Arthropoda	Hexapoda	Lepidoptera	Lepidoptera_fam_gen_sp	Lepidoptera_fam_gen_sp	Lepidoptera_fam_gen_sp	Lepidoptera_fam_gen_sp	hexapods	12.287	789	46
1892	NA	NA	bastet_marc_lucile_ottavioli_jaworski	79510	2022	4	Femelle	0	Arthropoda	Hexapoda	Lepidoptera	Lepidoptera_fam_gen_sp	Lepidoptera_fam_gen_sp	Lepidoptera_fam_gen_sp	Lepidoptera_fam_gen_sp	hexapods	12.287	789	46
1893	NA	NA	bastet_marc_lucile_ottavioli_jaworski	79510	2022	5	Femelle	0	Arthropoda	Hexapoda	Lepidoptera	Lepidoptera_fam_gen_sp	Lepidoptera_fam_gen_sp	Lepidoptera_fam_gen_sp	Lepidoptera_fam_gen_sp	hexapods	12.287	789	46
1894	NA	NA	bastet_marc_lucile_ottavioli_jaworski	79510	2022	5	Femelle	0	Arthropoda	Hexapoda	Lepidoptera	Lepidoptera_fam_gen_sp	Lepidoptera_fam_gen_sp	Lepidoptera_fam_gen_sp	Lepidoptera_fam_gen_sp	hexapods	12.287	789	46
1895	NA	NA	bastet_marc_lucile_ottavioli_jaworski	79510	2022	5	Femelle	0	Arthropoda	Hexapoda	Lepidoptera	Lepidoptera_fam_gen_sp	Lepidoptera_fam_gen_sp	Lepidoptera_fam_gen_sp	Lepidoptera_fam_gen_sp	hexapods	12.287	789	46
1896	NA	NA	bastet_marc_lucile_ottavioli_jaworski	79510	2022	7	Femelle	0	Arthropoda	Hexapoda	Lepidoptera	Lepidoptera_fam_gen_sp	Lepidoptera_fam_gen_sp	Lepidoptera_fam_gen_sp	Lepidoptera_fam_gen_sp	hexapods	12.287	789	46
1897	NA	NA	bastet_marc_lucile_ottavioli_jaworski	79510	2022	6	Femelle	0	Arthropoda	Hexapoda	Lepidoptera	Lepidoptera_fam_gen_sp	Lepidoptera_fam_gen_sp	Lepidoptera_fam_gen_sp	Lepidoptera_fam_gen_sp	hexapods	12.287	789	46
1898	NA	NA	bastet_marc_lucile_ottavioli_jaworski	79510	2022	3	Femelle	0	Arthropoda	Hexapoda	Lepidoptera	Lepidoptera_fam_gen_sp	Lepidoptera_fam_gen_sp	Lepidoptera_fam_gen_sp	Lepidoptera_fam_gen_sp	hexapods	12.287	789	46
1899	NA	NA	bastet_marc_lucile_ottavioli_jaworski	79510	2022	5	Femelle	0	Arthropoda	Hexapoda	Lepidoptera	Lepidoptera_fam_gen_sp	Lepidoptera_fam_gen_sp	Lepidoptera_fam_gen_sp	Lepidoptera_fam_gen_sp	hexapods	12.287	789	46
1900	NA	NA	bastet_marc_lucile_ottavioli_jaworski	79510	2022	6	Femelle	0	Arthropoda	Hexapoda	Lepidoptera	Lepidoptera_fam_gen_sp	Lepidoptera_fam_gen_sp	Lepidoptera_fam_gen_sp	Lepidoptera_fam_gen_sp	hexapods	12.287	789	46
1901	NA	NA	bastet_marc_lucile_ottavioli_jaworski	79510	2022	8	Femelle	0	Arthropoda	Hexapoda	Orthoptera	Orthoptera_fam_gen_sp	Orthoptera_fam_gen_sp	Orthoptera_fam_gen_sp	Orthoptera_fam_gen_sp	hexapods	12.287	789	46
1902	NA	NA	bastet_marc_lucile_ottavioli_jaworski	79510	2022	7	Femelle	0	Arthropoda	Hexapoda	Orthoptera	Orthoptera_fam_gen_sp	Orthoptera_fam_gen_sp	Orthoptera_fam_gen_sp	Orthoptera_fam_gen_sp	hexapods	12.287	789	46
1903	NA	NA	bastet_marc_lucile_ottavioli_jaworski	79510	2022	8	Femelle	0	Arthropoda	Hexapoda	Orthoptera	Orthoptera_fam_gen_sp	Orthoptera_fam_gen_sp	Orthoptera_fam_gen_sp	Orthoptera_fam_gen_sp	hexapods	12.287	789	46
1904	NA	NA	bastet_marc_lucile_ottavioli_jaworski	79510	2022	8	Femelle	0	Arthropoda	Hexapoda	Orthoptera	Orthoptera_fam_gen_sp	Orthoptera_fam_gen_sp	Orthoptera_fam_gen_sp	Orthoptera_fam_gen_sp	hexapods	12.287	789	46
1905	NA	NA	bastet_marc_lucile_ottavioli_jaworski	79510	2022	7	Femelle	0	Tetrapoda	Mammalia	Rodentia	Myomorpha	Cricetidae	microtus	Microtus_arvalis	cricetids	12.287	789	46
1906	NA	NA	bastet_marc_lucile_ottavioli_jaworski	79510	2022	5	Femelle	0	Tetrapoda	Mammalia	Rodentia	Myomorpha	Cricetidae	microtus	Microtus_arvalis	cricetids	12.287	789	46
1907	NA	NA	bastet_marc_lucile_ottavioli_jaworski	79510	2022	6	Femelle	0	Tetrapoda	Mammalia	Rodentia	Myomorpha	Cricetidae	microtus	Microtus_arvalis	cricetids	12.287	789	46
1908	NA	NA	bastet_marc_lucile_ottavioli_jaworski	79510	2022	6	Femelle	0	Tetrapoda	Mammalia	Rodentia	Myomorpha	Cricetidae	microtus	Microtus_arvalis	cricetids	12.287	789	46
1909	NA	NA	bastet_marc_lucile_ottavioli_jaworski	79510	2022	7	Femelle	0	Tetrapoda	Mammalia	Rodentia	Myomorpha	Cricetidae	microtus	Microtus_arvalis	cricetids	12.287	789	46
1910	NA	NA	bastet_marc_lucile_ottavioli_jaworski	79510	2022	5	Femelle	0	Tetrapoda	Mammalia	Rodentia	Myomorpha	Cricetidae	microtus	Microtus_arvalis	cricetids	12.287	789	46
1911	NA	NA	bastet_marc_lucile_ottavioli_jaworski	79510	2022	7	Femelle	0	Tetrapoda	Mammalia	Rodentia	Myomorpha	Cricetidae	microtus	Microtus_arvalis	cricetids	12.287	789	46
1912	NA	NA	bastet_marc_lucile_ottavioli_jaworski	79510	2022	7	Femelle	0	Tetrapoda	Mammalia	Rodentia	Myomorpha	Cricetidae	microtus	Microtus_arvalis	cricetids	12.287	789	46
1913	NA	NA	bastet_marc_lucile_ottavioli_jaworski	79510	2022	6	Femelle	0	Tetrapoda	Mammalia	Rodentia	Myomorpha	Cricetidae	microtus	Microtus_arvalis	cricetids	12.287	789	46
1914	NA	NA	bastet_marc_lucile_ottavioli_jaworski	79510	2022	7	Femelle	0	Tetrapoda	Mammalia	Rodentia	Myomorpha	Cricetidae	microtus	Microtus_arvalis	cricetids	12.287	789	46
1915	NA	NA	bastet_marc_lucile_ottavioli_jaworski	79510	2022	8	Femelle	0	Tetrapoda	Mammalia	Rodentia	Sciuromorpha	Gliridae	eliomys	Eliomys_quercinus	other_mammals	12.287	789	46
1916	NA	NA	bastet_marc_lucile_ottavioli_jaworski	79510	2021	11	Femelle	0	Tetrapoda	Mammalia	Rodentia	Myomorpha	Muridae	apodemus	Apodemus_sp	muroids	12.287	789	46
1917	NA	NA	bastet_marc_lucile_ottavioli_jaworski	79510	2021	11	Femelle	0	Tetrapoda	Mammalia	Rodentia	Myomorpha	Muridae	apodemus	Apodemus_sp	muroids	12.287	789	46
1918	NA	NA	bastet_marc_lucile_ottavioli_jaworski	79510	2021	11	Femelle	0	Tetrapoda	Mammalia	Rodentia	Myomorpha	Muridae	apodemus	Apodemus_sp	muroids	12.287	789	46
1919	NA	NA	bastet_marc_lucile_ottavioli_jaworski	79510	2022	1	Femelle	0	Tetrapoda	Mammalia	Rodentia	Myomorpha	Muridae	apodemus	Apodemus_sp	muroids	12.287	789	46
1920	NA	NA	bastet_marc_lucile_ottavioli_jaworski	79510	2022	3	Femelle	0	Tetrapoda	Mammalia	Rodentia	Myomorpha	Muridae	apodemus	Apodemus_sp	muroids	12.287	789	46
1921	NA	NA	bastet_marc_lucile_ottavioli_jaworski	79510	2022	6	Femelle	0	Tetrapoda	Mammalia	Rodentia	Myomorpha	Muridae	apodemus	Apodemus_sp	muroids	12.287	789	46
1922	NA	NA	bastet_marc_lucile_ottavioli_jaworski	79510	2022	8	Femelle	0	Tetrapoda	Mammalia	Rodentia	Myomorpha	Muridae	apodemus	Apodemus_sp	muroids	12.287	789	46
1923	NA	NA	bastet_marc_lucile_ottavioli_jaworski	79510	2022	8	Femelle	0	Tetrapoda	Mammalia	Rodentia	Myomorpha	Muridae	apodemus	Apodemus_sp	muroids	12.287	789	46
1924	NA	NA	bastet_marc_lucile_ottavioli_jaworski	79510	2022	7	Femelle	0	Tetrapoda	Mammalia	Rodentia	Myomorpha	Muridae	apodemus	Apodemus_sylvaticus	muroids	12.287	789	46
1925	NA	NA	bastet_marc_lucile_ottavioli_jaworski	79510	2022	7	Femelle	0	Tetrapoda	Mammalia	Rodentia	Myomorpha	Muridae	apodemus	Apodemus_sylvaticus	muroids	12.287	789	46
1926	NA	NA	bastet_marc_lucile_ottavioli_jaworski	79510	2022	7	Femelle	0	Tetrapoda	Mammalia	Rodentia	Myomorpha	Muridae	apodemus	Apodemus_sylvaticus	muroids	12.287	789	46
1927	NA	NA	bastet_marc_lucile_ottavioli_jaworski	79510	2022	6	Femelle	0	Tetrapoda	Mammalia	Eulipotyphla	Soricidae	Soricidae	Soricidae_gen_sp	Soricidae_gen_sp	soricids	12.287	789	46
1928	NA	NA	bastet_marc_lucile_ottavioli_jaworski	79510	2022	7	Femelle	0	Tetrapoda	Mammalia	Eulipotyphla	Soricidae	Soricidae	Soricidae_gen_sp	Soricidae_gen_sp	soricids	12.287	789	46
1929	NA	NA	bastet_marc_lucile_ottavioli_jaworski	79510	2022	6	Femelle	0	Tetrapoda	Mammalia	Eulipotyphla	Soricidae	Soricidae	Soricidae_gen_sp	Soricidae_gen_sp	soricids	12.287	789	46
1930	NA	NA	bastet_marc_lucile_ottavioli_jaworski	79510	2022	7	Femelle	0	Tetrapoda	Mammalia	Eulipotyphla	Soricidae	Soricidae	Soricidae_gen_sp	Soricidae_gen_sp	soricids	12.287	789	46
1931	NA	NA	bastet_marc_lucile_ottavioli_jaworski	79510	2022	5	Femelle	0	Tetrapoda	Mammalia	Eulipotyphla	Soricidae	Soricidae	Soricidae_gen_sp	Soricidae_gen_sp	soricids	12.287	789	46
1932	NA	NA	bastet_marc_lucile_ottavioli_jaworski	79510	2022	6	Femelle	0	Tetrapoda	Mammalia	Eulipotyphla	Soricidae	Soricidae	Soricidae_gen_sp	Soricidae_gen_sp	soricids	12.287	789	46
1933	NA	NA	bastet_marc_lucile_ottavioli_jaworski	79510	2022	3	Femelle	0	Tetrapoda	Mammalia	Eulipotyphla	Soricidae	Soricidae	Soricidae_gen_sp	Soricidae_gen_sp	soricids	12.287	789	46
1934	NA	NA	bastet_marc_lucile_ottavioli_jaworski	79510	2022	4	Femelle	0	Tetrapoda	Mammalia	Eulipotyphla	Soricidae	Soricidae	Soricidae_gen_sp	Soricidae_gen_sp	soricids	12.287	789	46
1935	NA	NA	bastet_marc_lucile_ottavioli_jaworski	79510	2022	7	Femelle	0	Tetrapoda	Mammalia	Eulipotyphla	Soricidae	Soricidae	Soricidae_gen_sp	Soricidae_gen_sp	soricids	12.287	789	46
1936	NA	NA	bastet_marc_lucile_ottavioli_jaworski	79510	2022	7	Femelle	0	Tetrapoda	Mammalia	Eulipotyphla	Soricidae	Soricidae	Soricidae_gen_sp	Soricidae_gen_sp	soricids	12.287	789	46
1937	NA	NA	bastet_marc_lucile_ottavioli_jaworski	79510	2022	6	Femelle	0	Tetrapoda	Mammalia	Eulipotyphla	Soricidae	Soricidae	Soricidae_gen_sp	Soricidae_gen_sp	soricids	12.287	789	46
1938	NA	NA	bastet_marc_lucile_ottavioli_jaworski	79510	2022	6	Femelle	0	Tetrapoda	Mammalia	Eulipotyphla	Soricidae	Soricidae	Soricidae_gen_sp	Soricidae_gen_sp	soricids	12.287	789	46
1939	NA	NA	bastet_marc_lucile_ottavioli_jaworski	79510	2022	8	Femelle	0	Tetrapoda	Mammalia	Rodentia	Myomorpha	Cricetidae	Cricetidae_gen_sp	Cricetidae_gen_sp	cricetids	12.287	789	46
1940	NA	NA	bastet_marc_lucile_ottavioli_jaworski	79510	2022	8	Femelle	0	Tetrapoda	Mammalia	Rodentia	Myomorpha	Cricetidae	Cricetidae_gen_sp	Cricetidae_gen_sp	cricetids	12.287	789	46
1941	NA	NA	bastet_marc_lucile_ottavioli_jaworski	79510	2022	4	Femelle	0	Tetrapoda	Mammalia	Rodentia	Myomorpha	Muroidea_fam_gen_sp	Muroidea_fam_gen_sp	Muroidea_fam_gen_sp	muroids	12.287	789	46
1942	NA	NA	bastet_marc_lucile_ottavioli_jaworski	79510	2021	11	Femelle	0	Tetrapoda	Mammalia	Rodentia	Myomorpha	Muroidea_fam_gen_sp	Muroidea_fam_gen_sp	Muroidea_fam_gen_sp	muroids	12.287	789	46
1943	NA	NA	bastet_marc_lucile_ottavioli_jaworski	79510	2021	11	Femelle	0	Tetrapoda	Mammalia	Rodentia	Myomorpha	Muroidea_fam_gen_sp	Muroidea_fam_gen_sp	Muroidea_fam_gen_sp	muroids	12.287	789	46
1944	NA	NA	bastet_marc_lucile_ottavioli_jaworski	79510	2021	11	Femelle	0	Tetrapoda	Mammalia	Rodentia	Myomorpha	Muroidea_fam_gen_sp	Muroidea_fam_gen_sp	Muroidea_fam_gen_sp	muroids	12.287	789	46
1945	NA	NA	bastet_marc_lucile_ottavioli_jaworski	79510	2022	7	Femelle	0	Tetrapoda	Mammalia	Rodentia	Myomorpha	Muroidea_fam_gen_sp	Muroidea_fam_gen_sp	Muroidea_fam_gen_sp	muroids	12.287	789	46
1946	NA	NA	bastet_marc_lucile_ottavioli_jaworski	79510	2022	8	Femelle	0	Tetrapoda	Mammalia	Rodentia	Myomorpha	Muroidea_fam_gen_sp	Muroidea_fam_gen_sp	Muroidea_fam_gen_sp	muroids	12.287	789	46
1947	NA	NA	bastet_marc_lucile_ottavioli_jaworski	79510	2022	7	Femelle	0	Tetrapoda	Mammalia	Rodentia	Myomorpha	Muroidea_fam_gen_sp	Muroidea_fam_gen_sp	Muroidea_fam_gen_sp	muroids	12.287	789	46
1948	NA	NA	bastet_marc_lucile_ottavioli_jaworski	79510	2022	7	Femelle	0	Tetrapoda	Mammalia	Rodentia	Myomorpha	Muroidea_fam_gen_sp	Muroidea_fam_gen_sp	Muroidea_fam_gen_sp	muroids	12.287	789	46
1949	NA	NA	bastet_marc_lucile_ottavioli_jaworski	79510	2021	11	Femelle	0	Tetrapoda	Mammalia	Rodentia	Myomorpha	Muroidea_fam_gen_sp	Muroidea_fam_gen_sp	Muroidea_fam_gen_sp	muroids	12.287	789	46
1950	NA	NA	bastet_marc_lucile_ottavioli_jaworski	79510	2022	6	Femelle	0	Tetrapoda	Mammalia	Rodentia	Myomorpha	Muridae	mus	Mus_musculus	muroids	12.287	789	46
1951	NA	NA	bastet_marc_lucile_ottavioli_jaworski	79510	2022	8	Femelle	0	Tetrapoda	Mammalia	Rodentia	Myomorpha	Muridae	mus	Mus_musculus	muroids	12.287	789	46
1952	NA	NA	bastet_marc_lucile_ottavioli_jaworski	79510	2021	11	Femelle	0	Tetrapoda	Mammalia	Rodentia	Myomorpha	Muridae	mus	Mus_musculus	muroids	12.287	789	46
1953	NA	NA	bastet_marc_lucile_ottavioli_jaworski	79510	2022	6	Femelle	0	Tetrapoda	Mammalia	Rodentia	Myomorpha	Muridae	mus	Mus_musculus	muroids	12.287	789	46
1954	NA	NA	bastet_marc_lucile_ottavioli_jaworski	79510	2022	8	Femelle	0	Tetrapoda	Mammalia	Rodentia	Myomorpha	Muridae	mus	Mus_musculus	muroids	12.287	789	46
1955	NA	NA	bastet_marc_lucile_ottavioli_jaworski	79510	2022	8	Femelle	0	Tetrapoda	Squamata	Squamata	Serpentes	Colubridae	zamenis	Zamenis_longissimus	other_squamata	12.287	789	46
1956	NA	NA	bastet_marc_lucile_ottavioli_jaworski	79510	2022	5	Femelle	0	Tetrapoda	Squamata	Squamata	Serpentes	Colubridae	zamenis	Zamenis_longissimus	other_squamata	12.287	789	46
1957	NA	NA	bastet_marc_lucile_ottavioli_jaworski	79510	2022	4	Femelle	0	Tetrapoda	Squamata	Squamata	Serpentes	Colubridae	zamenis	Zamenis_longissimus	other_squamata	12.287	789	46
1958	NA	NA	bastet_marc_lucile_ottavioli_jaworski	79510	2022	5	Femelle	0	Tetrapoda	Squamata	Squamata	Serpentes	Colubridae	zamenis	Zamenis_longissimus	other_squamata	12.287	789	46
1959	NA	NA	bastet_marc_lucile_ottavioli_jaworski	79510	2022	6	Femelle	0	Tetrapoda	Squamata	Squamata	Lacertilia	Lacertidae	podarcis	Podarcis_muralis	lacertilia	12.287	789	46
1960	NA	NA	bastet_marc_lucile_ottavioli_jaworski	79510	2022	6	Femelle	0	Tetrapoda	Squamata	Squamata	Lacertilia	Lacertidae	podarcis	Podarcis_muralis	lacertilia	12.287	789	46
1961	NA	NA	bastet_marc_lucile_ottavioli_jaworski	79510	2022	4	Femelle	0	Tetrapoda	Squamata	Squamata	Lacertilia	Lacertidae	podarcis	Podarcis_muralis	lacertilia	12.287	789	46
1962	NA	NA	bastet_marc_lucile_ottavioli_jaworski	79510	2022	4	Femelle	0	Tetrapoda	Squamata	Squamata	Lacertilia	Lacertidae	podarcis	Podarcis_muralis	lacertilia	12.287	789	46
1963	NA	NA	bastet_marc_lucile_ottavioli_jaworski	79510	2022	5	Femelle	0	Tetrapoda	Squamata	Squamata	Lacertilia	Lacertidae	podarcis	Podarcis_muralis	lacertilia	12.287	789	46
1964	NA	NA	bastet_marc_lucile_ottavioli_jaworski	79510	2022	5	Femelle	0	Tetrapoda	Squamata	Squamata	Lacertilia	Lacertidae	podarcis	Podarcis_muralis	lacertilia	12.287	789	46
1965	NA	NA	bastet_marc_lucile_ottavioli_jaworski	79510	2022	8	Femelle	0	Tetrapoda	Squamata	Squamata	Lacertilia	Lacertidae	podarcis	Podarcis_muralis	lacertilia	12.287	789	46
1966	15086	15121	batman_clement_burel	76430	2016	5	Male	5	Tetrapoda	Mammalia	Rodentia	Myomorpha	Muroidea_fam_gen_sp	Muroidea_fam_gen_sp	Muroidea_fam_gen_sp	muroids	10.8647	769	59
1967	12844	12879	batman_clement_burel	76430	2016	4	Male	5	Tetrapoda	Mammalia	Rodentia	Myomorpha	Muroidea_fam_gen_sp	Muroidea_fam_gen_sp	Muroidea_fam_gen_sp	muroids	10.8647	769	59
1968	12849	12884	batman_clement_burel	76430	2016	4	Male	5	Tetrapoda	Mammalia	Rodentia	Myomorpha	Muroidea_fam_gen_sp	Muroidea_fam_gen_sp	Muroidea_fam_gen_sp	muroids	10.8647	769	59
1969	12926	12961	batman_clement_burel	76430	2015	3	Male	4	Tetrapoda	Mammalia	Rodentia	Myomorpha	Muroidea_fam_gen_sp	Muroidea_fam_gen_sp	Muroidea_fam_gen_sp	muroids	10.8647	769	59
1970	15087	15122	batman_clement_burel	76430	2016	5	Male	5	Tetrapoda	Mammalia	Rodentia	Myomorpha	Muroidea_fam_gen_sp	Muroidea_fam_gen_sp	Muroidea_fam_gen_sp	muroids	10.8647	769	59
1971	17790	17825	batman_clement_burel	76430	2016	6	Male	5	Tetrapoda	Mammalia	Rodentia	Myomorpha	Muroidea_fam_gen_sp	Muroidea_fam_gen_sp	Muroidea_fam_gen_sp	muroids	10.8647	769	59
1972	12934	12969	batman_clement_burel	76430	2015	9	Male	4	Tetrapoda	Mammalia	Eulipotyphla	Talpidae	Talpidae	talpa	Talpa_sp	other_mammals	10.8647	769	59
1973	2228	2250	batman_matthieu_cosson	44680	2015	7	Male	3	Tetrapoda	Mammalia	Rodentia	Sciuromorpha	Gliridae	eliomys	Eliomys_quercinus	other_mammals	12.108	776	40
1974	17519	17554	batman_sylvie_gasnet	26780	2016	4	Male	2	Tetrapoda	Aves	Passeriformes	Passeri	Turdidae	turdus	Turdus_philomelos	passeriforms	13.0037	923	62
1975	17522	17557	batman_sylvie_gasnet	26780	2015	7	Male	1	Tetrapoda	Aves	Passeriformes	Passeri	Turdidae	turdus	Turdus_merula	passeriforms	13.0037	923	62
1976	17524	17559	batman_sylvie_gasnet	26780	2016	5	Male	2	Tetrapoda	Mammalia	Eulipotyphla	Soricidae	Soricidae	Soricidae_gen_sp	Soricidae_gen_sp	soricids	13.0037	923	62
1977	17525	17560	batman_sylvie_gasnet	26780	2015	8	Male	1	Tetrapoda	Squamata	Squamata	Lacertilia	Lacertidae	lacerta	Lacerta_bilineata	lacertilia	13.0037	923	62
1978	8387	8414	batmane_nicolas_baivel	78810	2015	11	Femelle	3	Tetrapoda	Mammalia	Rodentia	Myomorpha	Muridae	apodemus	Apodemus_sp	muroids	10.5106	642	60
1979	4830	4852	batna_joelle_royet	60120	2015	9	Femelle	2	Tetrapoda	Aves	Aves_ord_fam_gen_sp	Aves_ord_fam_gen_sp	Aves_ord_fam_gen_sp	Aves_ord_fam_gen_sp	Aves_ord_fam_gen_sp	other_birds	9.95083	676	40
1980	6135	6157	batna_joelle_royet	60120	2015	10	Femelle	2	Tetrapoda	Mammalia	Rodentia	Myomorpha	Muroidea_fam_gen_sp	Muroidea_fam_gen_sp	Muroidea_fam_gen_sp	muroids	9.95083	676	40
1981	22092	22127	batou_isabelle_bernier	15300	2016	8	Male	1	Tetrapoda	Squamata	Squamata	Lacertilia	Lacertidae	podarcis	Podarcis_muralis	lacertilia	7.22304	932	62
1982	23345	23380	batou_isabelle_bernier	15300	2016	10	Male	1	Tetrapoda	Squamata	Squamata	Lacertilia	Lacertidae	podarcis	Podarcis_muralis	lacertilia	7.22304	932	62
1983	15720	15755	baudouin_cecile_bouzin	59173	2016	5	Male	3	Tetrapoda	Aves	Passeriformes	Passeri	Fringillidae	carduelis	Carduelis_carduelis	passeriforms	10.248	683	40
1984	27196	27231	baudouin_cecile_bouzin	59173	2017	5	Male	4	Tetrapoda	Aves	Passeriformes	Passeri	Paridae	parus	Parus_major	passeriforms	10.248	683	40
1985	27311	27346	baudouin_cecile_bouzin	59173	2017	5	Male	4	Tetrapoda	Aves	Passeriformes	Passeri	Paridae	parus	Parus_major	passeriforms	10.248	683	40
1986	24168	24203	baudouin_cecile_bouzin	59173	2016	11	Male	3	Tetrapoda	Aves	Passeriformes	Passeri_fam_gen_sp	Passeri_fam_gen_sp	Passeri_fam_gen_sp	Passeri_fam_gen_sp	passeriforms	10.248	683	40
1987	15719	15754	baudouin_cecile_bouzin	59173	2016	5	Male	3	Tetrapoda	Mammalia	Eulipotyphla	Soricidae	Soricidae	Soricidae_gen_sp	Soricidae_gen_sp	soricids	10.248	683	40
1988	20832	20867	baudouin_cecile_bouzin	59173	2016	8	Male	3	Tetrapoda	Mammalia	Eulipotyphla	Soricidae	Soricidae	Soricidae_gen_sp	Soricidae_gen_sp	soricids	10.248	683	40
1989	21364	21399	baudouin_cecile_bouzin	59173	2016	8	Male	3	Tetrapoda	Mammalia	Eulipotyphla	Soricidae	Soricidae	Soricidae_gen_sp	Soricidae_gen_sp	soricids	10.248	683	40
1990	5586	5608	baudouin_cecile_bouzin	59173	2015	10	Male	2	Tetrapoda	Mammalia	Rodentia	Myomorpha	Muridae	mus	Mus_musculus	muroids	10.248	683	40
1991	6243	6265	baudouin_cecile_bouzin	59173	2015	10	Male	2	Tetrapoda	Mammalia	Rodentia	Myomorpha	Muridae	mus	Mus_musculus	muroids	10.248	683	40
1992	6524	6546	baudouin_cecile_bouzin	59173	2015	10	Male	2	Tetrapoda	Mammalia	Rodentia	Myomorpha	Muridae	mus	Mus_musculus	muroids	10.248	683	40
1993	35208	35243	baufidjiel_cecile_bouzin	59173	2019	4	NA	NA	Tetrapoda	Aves	Passeriformes	Passeri	Passeridae	passer	Passer_sp	passeriforms	10.248	683	40
1994	32652	32687	baufidjiel_cecile_bouzin	59173	2018	5	NA	NA	Tetrapoda	Aves	Aves_ord_fam_gen_sp	Aves_ord_fam_gen_sp	Aves_ord_fam_gen_sp	Aves_ord_fam_gen_sp	Aves_ord_fam_gen_sp	other_birds	10.248	683	40
1995	33771	33806	baufidjiel_cecile_bouzin	59173	2018	9	NA	NA	Tetrapoda	Aves	Aves_ord_fam_gen_sp	Aves_ord_fam_gen_sp	Aves_ord_fam_gen_sp	Aves_ord_fam_gen_sp	Aves_ord_fam_gen_sp	other_birds	10.248	683	40
1996	32236	32271	baufidjiel_cecile_bouzin	59173	2018	5	NA	NA	Tetrapoda	Aves	Passeriformes	Passeri_fam_gen_sp	Passeri_fam_gen_sp	Passeri_fam_gen_sp	Passeri_fam_gen_sp	passeriforms	10.248	683	40
1997	32922	32957	baufidjiel_cecile_bouzin	59173	2018	6	NA	NA	Tetrapoda	Mammalia	Lagomorpha	Leporidae	Leporidae	Leporidae_gen_sp	Leporidae_gen_sp	other_mammals	10.248	683	40
1998	24754	24789	baufidjiel_cecile_bouzin	59173	2016	12	NA	NA	Tetrapoda	Mammalia	Eulipotyphla	Soricidae	Soricidae	Soricidae_gen_sp	Soricidae_gen_sp	soricids	10.248	683	40
1999	32718	32753	baufidjiel_cecile_bouzin	59173	2018	6	NA	NA	Tetrapoda	Mammalia	Eulipotyphla	Soricidae	Soricidae	Soricidae_gen_sp	Soricidae_gen_sp	soricids	10.248	683	40
[truncated: 35,713 more rows]
